# Supplementary material for: Profiling of proteins secreted in the bovine oviduct reveals diverse functions of this luminal microenvironment
Source: PLoS One. 2017 Nov 20;12(11):e0188105. doi: 10.1371/journal.pone.0188105 (PMC5695823; doi:10.1371/journal.pone.0188105)
Supplement: S1 Dataset — (XLSX) [file pone.0188105.s005.xlsx]

## Sheet: TOTAL PROTEINS
	Total proteins identified (OF + OEC-48 + OEC-S4)
	tr|Q8SQ28|Q8SQ28_BOVIN	Serum amyloid A protein OS=Bos taurus GN=Saa3 PE=2 SV=1
	tr|Q861S4|Q861S4_BOVIN	Similar to ribosomal protein L21 (Fragment) OS=Bos taurus GN=RPL21 PE=2 SV=1
	tr|Q6QRN7|Q6QRN7_BOVIN	PP1201 protein OS=Bos taurus GN=RECS1 PE=2 SV=1
	tr|Q5GF34|Q5GF34_BOVIN	UBA7 protein OS=Bos taurus GN=UBA7 PE=2 SV=1
	tr|Q5E9F1|Q5E9F1_BOVIN	B-cell receptor-associated protein 31 OS=Bos taurus GN=BCAP31 PE=2 SV=1
	tr|Q5E970|Q5E970_BOVIN	DEAD (Asp-Glu-Ala-Asp) box polypeptide 39 isoform 1 OS=Bos taurus GN=DDX39 PE=2 SV=1
	tr|Q58DQ0|Q58DQ0_BOVIN	Arsenic (+3 oxidation state) methyltransferase OS=Bos taurus GN=AS3MT PE=2 SV=1
	tr|Q58DP6|Q58DP6_BOVIN	Ribonuclease 4 OS=Bos taurus GN=RNASE4 PE=2 SV=1
	tr|Q58DL9|Q58DL9_BOVIN	Phospholipid transfer protein OS=Bos taurus GN=PLTP PE=2 SV=1
	tr|Q56JY8|Q56JY8_BOVIN	Btf3 protein OS=Bos taurus GN=BTF3 PE=2 SV=1
	tr|Q3ZCI4|Q3ZCI4_BOVIN	6-phosphogluconate dehydrogenase, decarboxylating OS=Bos taurus GN=PGD PE=2 SV=2
	tr|Q3ZCA7|Q3ZCA7_BOVIN	Guanine nucleotide binding protein (G protein), alpha inhibiting activity polypeptide 3 OS=Bos taurus GN=GNAI3 PE=2 SV=1
	tr|Q3ZC32|Q3ZC32_BOVIN	Optineurin OS=Bos taurus GN=OPTN PE=2 SV=1
	tr|Q3ZBY4|Q3ZBY4_BOVIN	Fructose-bisphosphate aldolase OS=Bos taurus GN=ALDOC PE=2 SV=2
	tr|Q3ZBX5|Q3ZBX5_BOVIN	Small inducible cytokine subfamily E, member 1 (Endothelial monocyte-activating) OS=Bos taurus GN=SCYE1 PE=2 SV=2
	tr|Q3ZBH5|Q3ZBH5_BOVIN	Proliferation-associated 2G4, 38kDa OS=Bos taurus GN=PA2G4 PE=2 SV=1
	tr|Q3ZBH2|Q3ZBH2_BOVIN	NAD(P)H dehydrogenase, quinone 1 OS=Bos taurus GN=NQO1 PE=2 SV=1
	tr|Q3ZBG1|Q3ZBG1_BOVIN	RAB14 protein OS=Bos taurus GN=RAB14 PE=2 SV=2
	tr|Q3T105|Q3T105_BOVIN	GALE protein OS=Bos taurus GN=GALE PE=2 SV=2
	tr|Q3T0Y1|Q3T0Y1_BOVIN	OTU domain, ubiquitin aldehyde binding 1 OS=Bos taurus GN=OTUB1 PE=2 SV=1
	tr|Q3T0S7|Q3T0S7_BOVIN	Chromosome 14 open reading frame 166 ortholog OS=Bos taurus GN=C10H14ORF166 PE=2 SV=1
	tr|Q3T0G3|Q3T0G3_BOVIN	AHA1, activator of heat shock 90kDa protein ATPase homolog 1 (Yeast) OS=Bos taurus GN=AHSA1 PE=2 SV=1
	tr|Q3T076|Q3T076_BOVIN	Ribosomal protein S14 OS=Bos taurus GN=RPS14 PE=2 SV=1
	tr|Q3T010|Q3T010_BOVIN	Phosphatidylethanolamine-binding protein 4 OS=Bos taurus GN=PEBP4 PE=2 SV=1
	tr|Q3SZH5|Q3SZH5_BOVIN	Angiotensinogen OS=Bos taurus GN=AGT PE=2 SV=1
	tr|Q3SZA6|Q3SZA6_BOVIN	Syndecan binding protein (Syntenin) OS=Bos taurus GN=SDCBP PE=2 SV=1
	tr|Q3SZ32|Q3SZ32_BOVIN	Elongin B OS=Bos taurus GN=TCEB2 PE=4 SV=1
	tr|Q3SZ15|Q3SZ15_BOVIN	Eukaryotic translation elongation factor 1 epsilon 1 OS=Bos taurus GN=EEF1E1 PE=2 SV=1
	tr|Q3SYW7|Q3SYW7_BOVIN	SPARC-like 1 (Hevin) OS=Bos taurus GN=SPARCL1 PE=2 SV=1
	tr|Q3SYT9|Q3SYT9_BOVIN	Poly(RC) binding protein 2 OS=Bos taurus GN=PCBP2 PE=2 SV=1
	tr|Q3SYR8|Q3SYR8_BOVIN	Immunoglobulin J chain OS=Bos taurus GN=IGJ PE=2 SV=1
	tr|Q3SX33|Q3SX33_BOVIN	Thy-1 cell surface antigen OS=Bos taurus GN=THY1 PE=2 SV=1
	tr|Q3SX32|Q3SX32_BOVIN	Perilipin OS=Bos taurus GN=M6PRBP1 PE=2 SV=1
	tr|Q3MHG3|Q3MHG3_BOVIN	Sulfurtransferase OS=Bos taurus GN=MPST PE=2 SV=1
	tr|Q32PA1|Q32PA1_BOVIN	CD59 molecule, complement regulatory protein OS=Bos taurus GN=CD59 PE=2 SV=1
	tr|Q32LH2|Q32LH2_BOVIN	Centrin 4 OS=Bos taurus GN=CETN4 PE=2 SV=1
	tr|Q32LF7|Q32LF7_BOVIN	UDP-Gal:betaGlcNAc beta 1,4-galactosyltransferase, polypeptide 4 OS=Bos taurus GN=B4GALT4 PE=2 SV=1
	tr|Q32LC3|Q32LC3_BOVIN	Eukaryotic translation initiation factor 1A, X-linked OS=Bos taurus GN=EIF1AX PE=2 SV=1
	tr|Q32L46|Q32L46_BOVIN	5'-nucleotidase, cytosolic III OS=Bos taurus GN=NT5C3 PE=2 SV=1
	tr|Q32KU8|Q32KU8_BOVIN	NudC domain containing 2 OS=Bos taurus GN=NUDCD2 PE=2 SV=1
	tr|Q2T9M8|Q2T9M8_BOVIN	Synaptosomal-associated protein OS=Bos taurus GN=SNAP23 PE=2 SV=1
	tr|Q2NKU4|Q2NKU4_BOVIN	Calcium regulated heat stable protein 1, 24kDa OS=Bos taurus GN=CARHSP1 PE=2 SV=1
	tr|Q2LGB8|Q2LGB8_BOVIN	Caspase 8 OS=Bos taurus GN=CASP8 PE=2 SV=1
	tr|Q2KJE7|Q2KJE7_BOVIN	Proteasome (Prosome, macropain) activator subunit 1 (PA28 alpha) OS=Bos taurus GN=PSME1 PE=2 SV=1
	tr|Q2KJ86|Q2KJ86_BOVIN	Haloacid dehalogenase-like hydrolase domain containing 1A OS=Bos taurus GN=HDHD1A PE=2 SV=1
	tr|Q2KJ41|Q2KJ41_BOVIN	Tetraspanin 14 OS=Bos taurus GN=TSPAN14 PE=2 SV=1
	tr|Q2KJ23|Q2KJ23_BOVIN	Bridging integrator 1 OS=Bos taurus GN=BIN1 PE=2 SV=1
	tr|Q2KIW4|Q2KIW4_BOVIN	Lecithin-cholesterol acyltransferase OS=Bos taurus GN=LCAT PE=2 SV=1
	tr|Q2KIW1|Q2KIW1_BOVIN	Paraoxonase 1 OS=Bos taurus GN=PON1 PE=2 SV=1
	tr|Q2KIT8|Q2KIT8_BOVIN	Tissue specific transplantation antigen P35B OS=Bos taurus GN=TSTA3 PE=2 SV=1
	tr|Q2KII3|Q2KII3_BOVIN	Hepatitis A virus cellular receptor 1 N-terminal domain containing protein OS=Bos taurus GN=MGC137099 PE=2 SV=1
	tr|Q2KIF2|Q2KIF2_BOVIN	Leucine-rich alpha-2-glycoprotein 1 OS=Bos taurus GN=LRG1 PE=2 SV=1
	tr|Q2KIC7|Q2KIC7_BOVIN	PPP6C protein OS=Bos taurus GN=PPP6C PE=2 SV=2
	tr|Q2KI86|Q2KI86_BOVIN	Replication protein A2, 32kDa OS=Bos taurus GN=RPA2 PE=2 SV=1
	tr|Q2KI59|Q2KI59_BOVIN	Proteasome (Prosome, macropain) 26S subunit, non-ATPase, 10 OS=Bos taurus GN=PSMD10 PE=2 SV=1
	tr|Q2KI57|Q2KI57_BOVIN	Transportin 2 OS=Bos taurus GN=TNPO2 PE=2 SV=1
	tr|Q2HJ26|Q2HJ26_BOVIN	Phosphoribosylaminoimidazole carboxylase, phosphoribosylaminoimidazole succinocarboxamide synthetase OS=Bos taurus GN=PAICS PE=2 SV=1
	tr|Q24K01|Q24K01_BOVIN	NudC domain containing 3 OS=Bos taurus GN=NUDCD3 PE=2 SV=1
	tr|Q1RMX7|Q1RMX7_BOVIN	N-acetylneuraminic acid synthase OS=Bos taurus GN=NANS PE=2 SV=1
	tr|Q1RMW4|Q1RMW4_BOVIN	Adaptor protein, phosphotyrosine interaction, PH domain and leucine zipper containing 2 OS=Bos taurus GN=APPL2 PE=2 SV=1
	tr|Q1RMV5|Q1RMV5_BOVIN	Chromosome 5 open reading frame 22 ortholog OS=Bos taurus GN=C20H5ORF22 PE=2 SV=1
	tr|Q1RMR9|Q1RMR9_BOVIN	Protein kinase C and casein kinase substrate in neurons 2 OS=Bos taurus GN=PACSIN2 PE=2 SV=1
	tr|Q1RMR3|Q1RMR3_BOVIN	Cortactin OS=Bos taurus GN=CTTN PE=2 SV=1
	tr|Q1RMM2|Q1RMM2_BOVIN	Lymphocyte antigen 6 complex, locus E OS=Bos taurus GN=LY6E PE=2 SV=1
	tr|Q1RMH5|Q1RMH5_BOVIN	C1QC protein (Fragment) OS=Bos taurus GN=C1QC PE=2 SV=1
	tr|Q1LZ72|Q1LZ72_BOVIN	Canopy 2 homolog (Zebrafish) OS=Bos taurus GN=CNPY2 PE=2 SV=1
	tr|Q17QP9|Q17QP9_BOVIN	Proteasome (Prosome, macropain) 26S subunit, non-ATPase, 14 OS=Bos taurus GN=PSMD14 PE=2 SV=1
	tr|Q17QI3|Q17QI3_BOVIN	Acetyl-Coenzyme A acetyltransferase 2 OS=Bos taurus GN=ACAT2 PE=2 SV=1
	tr|Q17QH1|Q17QH1_BOVIN	APOF protein OS=Bos taurus GN=APOF PE=2 SV=2
	tr|Q17QC8|Q17QC8_BOVIN	Complement factor properdin OS=Bos taurus GN=CFP PE=2 SV=1
	tr|Q148G9|Q148G9_BOVIN	LSM6 homolog, U6 small nuclear RNA associated (S. cerevisiae) OS=Bos taurus GN=LSM6 PE=4 SV=1
	tr|Q148D3|Q148D3_BOVIN	Fumarate hydratase OS=Bos taurus GN=FH PE=2 SV=1
	tr|Q0VD49|Q0VD49_BOVIN	Histone deacetylase 10 OS=Bos taurus GN=HDAC10 PE=2 SV=1
	tr|Q0VD16|Q0VD16_BOVIN	MAP2K1 protein OS=Bos taurus GN=MAP2K1 PE=2 SV=2
	tr|Q0VCY8|Q0VCY8_BOVIN	Phosphoprotein enriched in astrocytes 15 OS=Bos taurus GN=PEA15 PE=2 SV=1
	tr|Q0VC96|Q0VC96_BOVIN	Thymocyte nuclear protein 1 OS=Bos taurus GN=THYN1 PE=2 SV=1
	tr|Q0VC51|Q0VC51_BOVIN	Interleukin 1 receptor accessory protein OS=Bos taurus GN=IL1RAP PE=2 SV=1
	tr|Q0VBY4|Q0VBY4_BOVIN	Tumor protein D52-like 1 OS=Bos taurus GN=TPD52L1 PE=2 SV=1
	tr|Q0V7N2|Q0V7N2_BOVIN	Complement C2 OS=Bos taurus GN=C2 PE=2 SV=1
	tr|Q0P5E0|Q0P5E0_BOVIN	Lymphocyte-specific protein 1 OS=Bos taurus GN=LSP1 PE=2 SV=1
	tr|Q0P5D6|Q0P5D6_BOVIN	Retinoic acid receptor responder (Tazarotene induced) 1 OS=Bos taurus GN=RARRES1 PE=2 SV=1
	tr|Q0P592|Q0P592_BOVIN	Fructosamine 3 kinase related protein OS=Bos taurus GN=FN3KRP PE=2 SV=1
	tr|Q0P568|Q0P568_BOVIN	Ubiquitin fusion degradation 1 like OS=Bos taurus GN=UFD1L PE=2 SV=1
	tr|Q0IIM6|Q0IIM6_BOVIN	Ubiquitin carboxyl-terminal hydrolase OS=Bos taurus GN=USP8 PE=2 SV=1
	tr|Q0IIH5|Q0IIH5_BOVIN	Nucleobindin 2 OS=Bos taurus GN=NUCB2 PE=2 SV=1
	tr|Q08E32|Q08E32_BOVIN	CHMP4B protein OS=Bos taurus GN=CHMP4B PE=2 SV=2
	tr|Q08DV2|Q08DV2_BOVIN	Glucosamine-phosphate N-acetyltransferase 1 OS=Bos taurus GN=GNPNAT1 PE=2 SV=1
	tr|Q08DB4|Q08DB4_BOVIN	Copine I OS=Bos taurus GN=CPNE1 PE=2 SV=1
	tr|Q05B69|Q05B69_BOVIN	NEDD8 ultimate buster 1 OS=Bos taurus GN=NUB1 PE=2 SV=1
	tr|H7BWW0|H7BWW0_BOVIN	Coronin OS=Bos taurus GN=CORO1B PE=2 SV=1
	tr|G8JL06|G8JL06_BOVIN	Histone H2B OS=Bos taurus GN=HIST1H2BB PE=3 SV=1
	tr|G8JKV5|G8JKV5_BOVIN	60S ribosomal protein L14 OS=Bos taurus GN=RPL14 PE=2 SV=1
	tr|G5E630|G5E630_BOVIN	Ubiquitin carboxyl-terminal hydrolase OS=Bos taurus GN=USP9X PE=3 SV=1
	tr|G5E5C8|G5E5C8_BOVIN	Transaldolase OS=Bos taurus GN=TALDO1 PE=2 SV=1
	tr|G5E589|G5E589_BOVIN	Proteasome subunit beta type OS=Bos taurus GN=PSMB1 PE=3 SV=1
	tr|G5E567|G5E567_BOVIN	Uncharacterized protein (Fragment) OS=Bos taurus GN=IPO9 PE=4 SV=1
	tr|G5E531|G5E531_BOVIN	T-complex protein 1 subunit alpha OS=Bos taurus GN=TCP1 PE=3 SV=1
	tr|G3X7D2|G3X7D2_BOVIN	Chitinase-3-like protein 1 OS=Bos taurus GN=CHI3L1 PE=3 SV=1
	tr|G3X757|G3X757_BOVIN	Transitional endoplasmic reticulum ATPase OS=Bos taurus GN=VCP PE=4 SV=1
	tr|G3X746|G3X746_BOVIN	Uncharacterized protein (Fragment) OS=Bos taurus GN=CABIN1 PE=4 SV=1
	tr|G3N3D4|G3N3D4_BOVIN	Uncharacterized protein OS=Bos taurus GN=KCTD12 PE=4 SV=1
	tr|G3N314|G3N314_BOVIN	Uncharacterized protein (Fragment) OS=Bos taurus GN=HEATR2 PE=4 SV=1
	tr|G3N2V5|G3N2V5_BOVIN	Heat shock protein HSP 90-beta OS=Bos taurus GN=HSP90AB1 PE=3 SV=1
	tr|G3N2H7|G3N2H7_BOVIN	Uncharacterized protein OS=Bos taurus GN=LOC786628 PE=4 SV=1
	tr|G3N2F0|G3N2F0_BOVIN	Elongation factor 1-alpha OS=Bos taurus PE=3 SV=1
	tr|G3N0T0|G3N0T0_BOVIN	Uncharacterized protein OS=Bos taurus GN=LOC510369 PE=4 SV=1
	tr|G3MZZ0|G3MZZ0_BOVIN	Glutathione peroxidase (Fragment) OS=Bos taurus GN=GPX2 PE=3 SV=1
	tr|G3MZC1|G3MZC1_BOVIN	5'-nucleotidase (Fragment) OS=Bos taurus GN=NT5E PE=4 SV=1
	tr|G3MYC1|G3MYC1_BOVIN	Uncharacterized protein OS=Bos taurus PE=3 SV=1
	tr|G3MY87|G3MY87_BOVIN	Uncharacterized protein OS=Bos taurus GN=MGAM PE=4 SV=1
	tr|G3MY23|G3MY23_BOVIN	Uncharacterized protein OS=Bos taurus GN=PARK2 PE=4 SV=1
	tr|G3MY14|G3MY14_BOVIN	Uncharacterized protein (Fragment) OS=Bos taurus GN=PRPS2 PE=4 SV=1
	tr|G3MXM1|G3MXM1_BOVIN	60S ribosomal protein L13a (Fragment) OS=Bos taurus GN=RPL13A PE=4 SV=1
	tr|G1K122|G1K122_BOVIN	Retinol-binding protein 4 OS=Bos taurus GN=RBP4 PE=2 SV=1
	tr|F6S1Q0|F6S1Q0_BOVIN	Uncharacterized protein OS=Bos taurus GN=KRT18 PE=2 SV=1
	tr|F6RM11|F6RM11_BOVIN	Uncharacterized protein OS=Bos taurus GN=NPTN PE=4 SV=1
	tr|F6QVC9|F6QVC9_BOVIN	Annexin OS=Bos taurus GN=ANXA5 PE=2 SV=1
	tr|F6QHN4|F6QHN4_BOVIN	Prolyl endopeptidase (Fragment) OS=Bos taurus GN=PREP PE=4 SV=1
	tr|F6QEL0|F6QEL0_BOVIN	Cystatin-B OS=Bos taurus GN=CST6 PE=4 SV=1
	tr|F6Q751|F6Q751_BOVIN	Uncharacterized protein OS=Bos taurus GN=GSTM2 PE=2 SV=1
	tr|F6Q0Z5|F6Q0Z5_BOVIN	Uncharacterized protein OS=Bos taurus GN=LRRC57 PE=2 SV=1
	tr|F6Q087|F6Q087_BOVIN	G1 to S phase transition 1 OS=Bos taurus GN=GSPT1 PE=4 SV=1
	tr|F2Z4J5|F2Z4J5_BOVIN	Eukaryotic translation initiation factor 3 subunit G OS=Bos taurus GN=EIF3G PE=3 SV=1
	tr|F2Z4J1|F2Z4J1_BOVIN	Histone H2A OS=Bos taurus GN=HIST1H2AC PE=3 SV=1
	tr|F2Z4D5|F2Z4D5_BOVIN	Ras-related protein Rab-11A OS=Bos taurus GN=RAB11A PE=3 SV=1
	tr|F1N7X5|F1N7X5_BOVIN	Uncharacterized protein (Fragment) OS=Bos taurus GN=AQP9 PE=3 SV=2
	tr|F1N7X3|F1N7X3_BOVIN	Nucleosome assembly protein 1-like 4 OS=Bos taurus GN=NAP1L4 PE=3 SV=1
	tr|F1N7M6|F1N7M6_BOVIN	Uncharacterized protein (Fragment) OS=Bos taurus GN=CEP85 PE=4 SV=1
	tr|F1N7H5|F1N7H5_BOVIN	Mannose-1-phosphate guanyltransferase beta OS=Bos taurus GN=GMPPB PE=4 SV=2
	tr|F1N7D7|F1N7D7_BOVIN	Dystroglycan OS=Bos taurus GN=DAG1 PE=4 SV=1
	tr|F1N782|F1N782_BOVIN	Complex III assembly factor LYRM7 OS=Bos taurus GN=LYRM7 PE=4 SV=1
	tr|F1N734|F1N734_BOVIN	Uncharacterized protein (Fragment) OS=Bos taurus GN=CHD6 PE=4 SV=2
	tr|F1N719|F1N719_BOVIN	Serine/threonine-protein phosphatase OS=Bos taurus GN=PPP5C PE=2 SV=1
	tr|F1N6W2|F1N6W2_BOVIN	Uncharacterized protein OS=Bos taurus GN=PPIL4 PE=2 SV=1
	tr|F1N6I5|F1N6I5_BOVIN	Versican core protein OS=Bos taurus GN=VCAN PE=2 SV=1
	tr|F1N6E0|F1N6E0_BOVIN	Uncharacterized protein OS=Bos taurus GN=OAS1Z PE=2 SV=2
	tr|F1N647|F1N647_BOVIN	Fatty acid synthase OS=Bos taurus GN=FASN PE=4 SV=2
	tr|F1N619|F1N619_BOVIN	Cadherin-1 (Fragment) OS=Bos taurus GN=CDH1 PE=2 SV=2
	tr|F1N5Z0|F1N5Z0_BOVIN	Uncharacterized protein OS=Bos taurus GN=AQP5 PE=3 SV=2
	tr|F1N5M2|F1N5M2_BOVIN	Vitamin D-binding protein OS=Bos taurus GN=GC PE=4 SV=2
	tr|F1N5I0|F1N5I0_BOVIN	Uncharacterized protein (Fragment) OS=Bos taurus GN=LYPD6B PE=4 SV=1
	tr|F1N5F7|F1N5F7_BOVIN	Eukaryotic translation initiation factor 3 subunit M OS=Bos taurus GN=EIF3M PE=3 SV=1
	tr|F1N596|F1N596_BOVIN	Uncharacterized protein OS=Bos taurus GN=CLK1 PE=4 SV=1
	tr|F1N594|F1N594_BOVIN	Uncharacterized protein OS=Bos taurus GN=RTDR1 PE=4 SV=2
	tr|F1N4W4|F1N4W4_BOVIN	Membrane cofactor protein OS=Bos taurus GN=CD46 PE=2 SV=2
	tr|F1N4R4|F1N4R4_BOVIN	dCTP pyrophosphatase 1 OS=Bos taurus GN=DCTPP1 PE=4 SV=1
	tr|F1N4A1|F1N4A1_BOVIN	Uncharacterized protein (Fragment) OS=Bos taurus GN=ARMC12 PE=4 SV=1
	tr|F1N458|F1N458_BOVIN	Uncharacterized protein (Fragment) OS=Bos taurus GN=ARHGAP17 PE=4 SV=1
	tr|F1N430|F1N430_BOVIN	Metalloproteinase inhibitor 2 OS=Bos taurus GN=TIMP2 PE=2 SV=1
	tr|F1N401|F1N401_BOVIN	Collagen alpha-1(XII) chain OS=Bos taurus GN=COL12A1 PE=2 SV=2
	tr|F1N3V0|F1N3V0_BOVIN	Malic enzyme OS=Bos taurus GN=ME1 PE=3 SV=2
	tr|F1N3S4|F1N3S4_BOVIN	Uncharacterized protein (Fragment) OS=Bos taurus GN=CUL4A PE=3 SV=2
	tr|F1N3Q7|F1N3Q7_BOVIN	Apolipoprotein A-IV OS=Bos taurus GN=APOA4 PE=3 SV=1
	tr|F1N3P2|F1N3P2_BOVIN	Ubiquitin carboxyl-terminal hydrolase OS=Bos taurus GN=USP5 PE=3 SV=2
	tr|F1N2A2|F1N2A2_BOVIN	Serpin B6 OS=Bos taurus GN=SERPINB6 PE=3 SV=2
	tr|F1N1X8|F1N1X8_BOVIN	Uncharacterized protein OS=Bos taurus GN=UBE2Z PE=2 SV=1
	tr|F1N1K6|F1N1K6_BOVIN	Uncharacterized protein (Fragment) OS=Bos taurus GN=DNHD1 PE=4 SV=2
	tr|F1N1I6|F1N1I6_BOVIN	Gelsolin OS=Bos taurus GN=GSN PE=2 SV=1
	tr|F1N1A3|F1N1A3_BOVIN	Uncharacterized protein OS=Bos taurus GN=UBQLN1 PE=2 SV=1
	tr|F1N161|F1N161_BOVIN	Calpastatin OS=Bos taurus GN=CAST PE=2 SV=2
	tr|F1N124|F1N124_BOVIN	Leucine-rich repeat-containing protein 23 OS=Bos taurus GN=LRRC23 PE=4 SV=2
	tr|F1N120|F1N120_BOVIN	Uncharacterized protein OS=Bos taurus GN=LXN PE=4 SV=2
	tr|F1N0T3|F1N0T3_BOVIN	Uncharacterized protein OS=Bos taurus GN=LOC404051 PE=3 SV=2
	tr|F1N0S5|F1N0S5_BOVIN	Cadherin-2 OS=Bos taurus GN=CDH2 PE=2 SV=2
	tr|F1N0E5|F1N0E5_BOVIN	T-complex protein 1 subunit delta OS=Bos taurus GN=CCT4 PE=3 SV=2
	tr|F1MZX0|F1MZX0_BOVIN	Protein kinase C delta type OS=Bos taurus GN=PRKCD PE=3 SV=1
	tr|F1MZW8|F1MZW8_BOVIN	Ribosomal protein S6 kinase OS=Bos taurus GN=RPS6KA3 PE=3 SV=1
	tr|F1MZ03|F1MZ03_BOVIN	Uncharacterized protein (Fragment) OS=Bos taurus GN=ACAP2 PE=2 SV=1
	tr|F1MYB8|F1MYB8_BOVIN	von Willebrand factor A domain-containing protein 7 OS=Bos taurus GN=VWA7 PE=4 SV=2
	tr|F1MY85|F1MY85_BOVIN	Complement C5a anaphylatoxin OS=Bos taurus GN=C5 PE=2 SV=2
	tr|F1MXU5|F1MXU5_BOVIN	Uncharacterized protein OS=Bos taurus GN=STARD10 PE=4 SV=2
	tr|F1MXH8|F1MXH8_BOVIN	Uncharacterized protein (Fragment) OS=Bos taurus GN=DMRTB1 PE=4 SV=1
	tr|F1MX63|F1MX63_BOVIN	Prolargin OS=Bos taurus GN=PRELP PE=4 SV=1
	tr|F1MWU9|F1MWU9_BOVIN	Uncharacterized protein OS=Bos taurus GN=HSPA6 PE=3 SV=2
	tr|F1MWT4|F1MWT4_BOVIN	Uncharacterized protein (Fragment) OS=Bos taurus GN=LEKR1 PE=4 SV=1
	tr|F1MWQ2|F1MWQ2_BOVIN	Annexin OS=Bos taurus GN=ANXA3 PE=3 SV=1
	tr|F1MWH2|F1MWH2_BOVIN	Adenosylhomocysteinase OS=Bos taurus GN=AHCYL1 PE=2 SV=2
	tr|F1MW00|F1MW00_BOVIN	Uncharacterized protein (Fragment) OS=Bos taurus GN=HIPK2 PE=4 SV=2
	tr|F1MV90|F1MV90_BOVIN	Uncharacterized protein OS=Bos taurus GN=LOC101906472 PE=3 SV=2
	tr|F1MV51|F1MV51_BOVIN	Uncharacterized protein OS=Bos taurus GN=APC PE=4 SV=2
	tr|F1MUZ9|F1MUZ9_BOVIN	60 kDa heat shock protein, mitochondrial OS=Bos taurus GN=HSPD1 PE=3 SV=1
	tr|F1MUK3|F1MUK3_BOVIN	Insulin-like growth factor-binding protein 6 OS=Bos taurus GN=IGFBP6 PE=4 SV=1
	tr|F1MU12|F1MU12_BOVIN	Keratin, type II cytoskeletal 8 OS=Bos taurus GN=KRT8 PE=3 SV=1
	tr|F1MTX7|F1MTX7_BOVIN	Aspartate--tRNA ligase, cytoplasmic OS=Bos taurus GN=DARS PE=3 SV=1
	tr|F1MTP5|F1MTP5_BOVIN	WD repeat-containing protein 1 OS=Bos taurus GN=WDR1 PE=4 SV=2
	tr|F1MTI7|F1MTI7_BOVIN	Protein CutA OS=Bos taurus GN=CUTA PE=2 SV=1
	tr|F1MSZ6|F1MSZ6_BOVIN	Antithrombin-III OS=Bos taurus GN=SERPINC1 PE=3 SV=1
	tr|F1MSR5|F1MSR5_BOVIN	Uncharacterized protein OS=Bos taurus GN=TBCK PE=4 SV=2
	tr|F1MSJ9|F1MSJ9_BOVIN	Uncharacterized protein OS=Bos taurus GN=RAB35 PE=3 SV=2
	tr|F1MSF1|F1MSF1_BOVIN	Ribonucleoside-diphosphate reductase OS=Bos taurus GN=RRM1 PE=3 SV=2
	tr|F1MSB5|F1MSB5_BOVIN	Uncharacterized protein OS=Bos taurus GN=GORASP2 PE=4 SV=1
	tr|F1MRG7|F1MRG7_BOVIN	Actin-related protein 2 OS=Bos taurus GN=ACTR2 PE=3 SV=2
	tr|F1MR96|F1MR96_BOVIN	Calpastatin OS=Bos taurus GN=CAST PE=2 SV=2
	tr|F1MR07|F1MR07_BOVIN	Uncharacterized protein OS=Bos taurus GN=HDDC3 PE=4 SV=2
	tr|F1MQN0|F1MQN0_BOVIN	Uncharacterized protein OS=Bos taurus GN=PPP2R1B PE=4 SV=2
	tr|F1MQJ0|F1MQJ0_BOVIN	Angiotensin-converting enzyme (Fragment) OS=Bos taurus GN=ACE PE=4 SV=2
	tr|F1MPJ8|F1MPJ8_BOVIN	Uncharacterized protein (Fragment) OS=Bos taurus GN=NPEPL1 PE=4 SV=2
	tr|F1MPG6|F1MPG6_BOVIN	Uncharacterized protein (Fragment) OS=Bos taurus GN=PTBP3 PE=4 SV=2
	tr|F1MNW4|F1MNW4_BOVIN	Inter-alpha-trypsin inhibitor heavy chain H2 OS=Bos taurus GN=ITIH2 PE=4 SV=2
	tr|F1MNV5|F1MNV5_BOVIN	Kininogen-1 OS=Bos taurus GN=KNG1 PE=2 SV=2
	tr|F1MNS2|F1MNS2_BOVIN	Uncharacterized protein (Fragment) OS=Bos taurus GN=SRPK2 PE=4 SV=2
	tr|F1MNF8|F1MNF8_BOVIN	Uncharacterized protein OS=Bos taurus GN=LOC100141266 PE=2 SV=1
	tr|F1MN63|F1MN63_BOVIN	Uncharacterized protein OS=Bos taurus GN=DEPDC5 PE=4 SV=2
	tr|F1MMU4|F1MMU4_BOVIN	Uncharacterized protein OS=Bos taurus GN=H1FX PE=3 SV=2
	tr|F1MMT2|F1MMT2_BOVIN	Uncharacterized protein (Fragment) OS=Bos taurus GN=LAMA2 PE=4 SV=2
	tr|F1MMP5|F1MMP5_BOVIN	Inter-alpha-trypsin inhibitor heavy chain H1 OS=Bos taurus GN=ITIH1 PE=4 SV=1
	tr|F1MMK9|F1MMK9_BOVIN	Protein AMBP OS=Bos taurus GN=AMBP PE=4 SV=2
	tr|F1MMK8|F1MMK8_BOVIN	Lysine--tRNA ligase OS=Bos taurus GN=KARS PE=3 SV=1
	tr|F1MMK2|F1MMK2_BOVIN	Glucose-6-phosphate 1-dehydrogenase OS=Bos taurus GN=G6PD PE=3 SV=1
	tr|F1MM32|F1MM32_BOVIN	Sulfhydryl oxidase OS=Bos taurus GN=QSOX1 PE=3 SV=2
	tr|F1MLV1|F1MLV1_BOVIN	26S protease regulatory subunit 10B OS=Bos taurus GN=PSMC6 PE=4 SV=2
	tr|F1MLH6|F1MLH6_BOVIN	Calmodulin OS=Bos taurus GN=CALM PE=4 SV=2
	tr|F1ML12|F1ML12_BOVIN	Glutaredoxin-3 OS=Bos taurus GN=GLRX3 PE=4 SV=2
	tr|F1MKW3|F1MKW3_BOVIN	Uncharacterized protein (Fragment) OS=Bos taurus GN=PLEKHS1 PE=4 SV=2
	tr|F1MKS5|F1MKS5_BOVIN	Histidine-rich glycoprotein OS=Bos taurus GN=HRG PE=4 SV=2
	tr|F1MJQ3|F1MJQ3_BOVIN	Uncharacterized protein OS=Bos taurus GN=AMY2B PE=3 SV=1
	tr|F1MJQ1|F1MJQ1_BOVIN	Ras-related protein Rab-7a OS=Bos taurus GN=RAB7A PE=3 SV=1
	tr|F1MJH8|F1MJH8_BOVIN	Uncharacterized protein (Fragment) OS=Bos taurus GN=ARHGAP18 PE=2 SV=2
	tr|F1MJ56|F1MJ56_BOVIN	Unconventional myosin-Id OS=Bos taurus GN=MYO1D PE=4 SV=1
	tr|F1MIR2|F1MIR2_BOVIN	Uncharacterized protein OS=Bos taurus GN=EXOC6B PE=4 SV=2
	tr|F1MIF2|F1MIF2_BOVIN	Uncharacterized protein OS=Bos taurus GN=AP1B1 PE=4 SV=1
	tr|F1MIE2|F1MIE2_BOVIN	Uncharacterized protein OS=Bos taurus GN=SQSTM1 PE=4 SV=2
	tr|F1MI78|F1MI78_BOVIN	Uncharacterized protein OS=Bos taurus GN=MAP9 PE=4 SV=2
	tr|F1MI43|F1MI43_BOVIN	Sperm surface protein Sp17 OS=Bos taurus GN=SPA17 PE=3 SV=1
	tr|F1MHG5|F1MHG5_BOVIN	Uncharacterized protein (Fragment) OS=Bos taurus GN=ARHGAP21 PE=4 SV=2
	tr|F1MHE7|F1MHE7_BOVIN	Uncharacterized protein OS=Bos taurus GN=LRRC40 PE=4 SV=1
	tr|F1MGU7|F1MGU7_BOVIN	Fibrinogen gamma-B chain OS=Bos taurus GN=FGG PE=2 SV=1
	tr|F1MG56|F1MG56_BOVIN	Serine/threonine-protein phosphatase 2A 55 kDa regulatory subunit B OS=Bos taurus GN=PPP2R2A PE=3 SV=2
	tr|F1MFY7|F1MFY7_BOVIN	Anoctamin (Fragment) OS=Bos taurus GN=ANO6 PE=3 SV=1
	tr|F1MFU5|F1MFU5_BOVIN	Uncharacterized protein OS=Bos taurus GN=RPAP3 PE=2 SV=2
	tr|F1MFC6|F1MFC6_BOVIN	Uncharacterized protein OS=Bos taurus GN=FARP1 PE=4 SV=2
	tr|F1MF92|F1MF92_BOVIN	Uncharacterized protein OS=Bos taurus GN=ZMYM6 PE=4 SV=2
	tr|F1MEN8|F1MEN8_BOVIN	Protein disulfide-isomerase A4 OS=Bos taurus GN=PDIA4 PE=2 SV=1
	tr|F1MEG3|F1MEG3_BOVIN	Uncharacterized protein OS=Bos taurus GN=LAMA1 PE=4 SV=2
	tr|F1MDT8|F1MDT8_BOVIN	Uncharacterized protein (Fragment) OS=Bos taurus GN=SETD2 PE=4 SV=2
	tr|F1MD74|F1MD74_BOVIN	Calpastatin OS=Bos taurus GN=CAST PE=2 SV=2
	tr|F1MD66|F1MD66_BOVIN	Annexin OS=Bos taurus GN=ANXA11 PE=2 SV=2
	tr|F1MD24|F1MD24_BOVIN	Uncharacterized protein OS=Bos taurus GN=SLC5A1 PE=2 SV=2
	tr|F1MD00|F1MD00_BOVIN	Uncharacterized protein (Fragment) OS=Bos taurus GN=FAM214A PE=2 SV=1
	tr|F1MCX1|F1MCX1_BOVIN	Uncharacterized protein (Fragment) OS=Bos taurus GN=GPC4 PE=3 SV=1
	tr|F1MC50|F1MC50_BOVIN	Uncharacterized protein (Fragment) OS=Bos taurus GN=ITSN2 PE=4 SV=2
	tr|F1MC45|F1MC45_BOVIN	Complement factor H (Fragment) OS=Bos taurus GN=CFH PE=4 SV=2
	tr|F1MC22|F1MC22_BOVIN	Uncharacterized protein OS=Bos taurus GN=C1H21orf59 PE=4 SV=1
	tr|F1MC11|F1MC11_BOVIN	Keratin, type I cytoskeletal 14 OS=Bos taurus GN=KRT14 PE=3 SV=2
	tr|F1MBS3|F1MBS3_BOVIN	Transforming growth factor-beta-induced protein ig-h3 (Fragment) OS=Bos taurus GN=TGFBI PE=4 SV=2
	tr|F1MBM9|F1MBM9_BOVIN	Uncharacterized protein OS=Bos taurus GN=ARHGEF7 PE=4 SV=2
	tr|F1MBI1|F1MBI1_BOVIN	Proteasome subunit beta type OS=Bos taurus GN=PSMB7 PE=3 SV=2
	tr|F1MBG6|F1MBG6_BOVIN	Uncharacterized protein OS=Bos taurus GN=GIT1 PE=4 SV=2
	tr|F1MB52|F1MB52_BOVIN	Uncharacterized protein OS=Bos taurus GN=BBS7 PE=4 SV=2
	tr|F1MAZ3|F1MAZ3_BOVIN	Microtubule-associated protein OS=Bos taurus GN=MAP4 PE=2 SV=2
	tr|F1MAV0|F1MAV0_BOVIN	Fibrinogen beta chain OS=Bos taurus GN=FGB PE=2 SV=2
	tr|F1MAU6|F1MAU6_BOVIN	Uncharacterized protein OS=Bos taurus GN=FSD1L PE=4 SV=2
	tr|E1BPW1|E1BPW1_BOVIN	Oxysterol-binding protein (Fragment) OS=Bos taurus GN=OSBP PE=3 SV=2
	tr|E1BNX1|E1BNX1_BOVIN	Uncharacterized protein OS=Bos taurus GN=RAB3D PE=3 SV=1
	tr|E1BN47|E1BN47_BOVIN	Cytoplasmic FMR1-interacting protein 1 OS=Bos taurus GN=CYFIP1 PE=4 SV=2
	tr|E1BN34|E1BN34_BOVIN	Uncharacterized protein OS=Bos taurus GN=BBS1 PE=4 SV=1
	tr|E1BMW9|E1BMW9_BOVIN	Uncharacterized protein OS=Bos taurus GN=PURA PE=4 SV=2
	tr|E1BMG2|E1BMG2_BOVIN	Uncharacterized protein OS=Bos taurus GN=DNAH5 PE=4 SV=2
	tr|E1BM92|E1BM92_BOVIN	Uncharacterized protein OS=Bos taurus GN=PROM2 PE=4 SV=2
	tr|E1BM12|E1BM12_BOVIN	Uncharacterized protein OS=Bos taurus GN=SRM PE=3 SV=1
	tr|E1BLL9|E1BLL9_BOVIN	Uncharacterized protein OS=Bos taurus GN=OAF PE=4 SV=2
	tr|E1BL62|E1BL62_BOVIN	Aldehyde oxidase 4 OS=Bos taurus GN=AOX4 PE=2 SV=1
	tr|E1BL45|E1BL45_BOVIN	Uncharacterized protein OS=Bos taurus GN=EHBP1L1 PE=4 SV=2
	tr|E1BKF9|E1BKF9_BOVIN	Uncharacterized protein OS=Bos taurus GN=WDR16 PE=4 SV=1
	tr|E1BKD0|E1BKD0_BOVIN	Ribosomal protein OS=Bos taurus PE=3 SV=2
	tr|E1BK70|E1BK70_BOVIN	Uncharacterized protein OS=Bos taurus PE=3 SV=2
	tr|E1BJB1|E1BJB1_BOVIN	Tubulin beta-2B chain OS=Bos taurus GN=TUBB2B PE=2 SV=1
	tr|E1BJ55|E1BJ55_BOVIN	Uncharacterized protein OS=Bos taurus GN=ZNF428 PE=4 SV=1
	tr|E1BIH1|E1BIH1_BOVIN	P2X purinoceptor OS=Bos taurus GN=P2RX2 PE=3 SV=2
	tr|E1BI28|E1BI28_BOVIN	Uncharacterized protein OS=Bos taurus GN=GM2A PE=4 SV=1
	tr|E1BHY4|E1BHY4_BOVIN	Uncharacterized protein OS=Bos taurus PE=4 SV=1
	tr|E1BHX7|E1BHX7_BOVIN	Uncharacterized protein OS=Bos taurus GN=PLCB3 PE=4 SV=1
	tr|E1BHV1|E1BHV1_BOVIN	Uncharacterized protein OS=Bos taurus GN=RYR2 PE=4 SV=2
	tr|E1BHJ5|E1BHJ5_BOVIN	Uncharacterized protein OS=Bos taurus GN=BBS9 PE=4 SV=2
	tr|E1BHH0|E1BHH0_BOVIN	Uncharacterized protein (Fragment) OS=Bos taurus GN=PHC1 PE=4 SV=2
	tr|E1BGA6|E1BGA6_BOVIN	Uncharacterized protein OS=Bos taurus GN=COG3 PE=4 SV=2
	tr|E1BFI8|E1BFI8_BOVIN	Uncharacterized protein OS=Bos taurus GN=SPAG1 PE=4 SV=2
	tr|E1BFG0|E1BFG0_BOVIN	Alpha-aminoadipic semialdehyde dehydrogenase OS=Bos taurus GN=ALDH7A1 PE=3 SV=2
	tr|E1BFC3|E1BFC3_BOVIN	Uncharacterized protein OS=Bos taurus GN=DFNA5 PE=4 SV=1
	tr|E1BEX4|E1BEX4_BOVIN	Uroporphyrinogen decarboxylase OS=Bos taurus GN=UROD PE=3 SV=1
	tr|E1BEU1|E1BEU1_BOVIN	Uncharacterized protein OS=Bos taurus GN=TTC12 PE=4 SV=2
	tr|E1BE13|E1BE13_BOVIN	Uncharacterized protein OS=Bos taurus GN=BIRC6 PE=4 SV=2
	tr|E1BCX9|E1BCX9_BOVIN	Uncharacterized protein (Fragment) OS=Bos taurus GN=EPS8 PE=2 SV=2
	tr|E1BCW0|E1BCW0_BOVIN	Uncharacterized protein (Fragment) OS=Bos taurus GN=HGFAC PE=3 SV=2
	tr|E1BCA5|E1BCA5_BOVIN	Uncharacterized protein OS=Bos taurus GN=SERPINI1 PE=3 SV=2
	tr|E1BC98|E1BC98_BOVIN	Transcription elongation factor SPT5 OS=Bos taurus GN=SUPT5H PE=2 SV=2
	tr|E1BC55|E1BC55_BOVIN	Uncharacterized protein OS=Bos taurus GN=KIAA1671 PE=4 SV=2
	tr|E1BBH1|E1BBH1_BOVIN	Uncharacterized protein OS=Bos taurus GN=PHLDB2 PE=4 SV=1
	tr|E1BB91|E1BB91_BOVIN	Uncharacterized protein OS=Bos taurus GN=COL6A3 PE=2 SV=1
	tr|E1BA62|E1BA62_BOVIN	Uncharacterized protein OS=Bos taurus GN=DNM3 PE=3 SV=2
	tr|E1B9Q4|E1B9Q4_BOVIN	Uncharacterized protein OS=Bos taurus GN=MSH6 PE=3 SV=2
	tr|E1B9F6|E1B9F6_BOVIN	Elongation factor 1-alpha OS=Bos taurus GN=EEF1A1 PE=3 SV=2
	tr|E1B9D9|E1B9D9_BOVIN	Uncharacterized protein (Fragment) OS=Bos taurus GN=TRAF2 PE=4 SV=2
	tr|E1B8P9|E1B8P9_BOVIN	Uncharacterized protein OS=Bos taurus GN=MAPK3 PE=4 SV=1
	tr|E1B7R4|E1B7R4_BOVIN	Eukaryotic translation initiation factor 3 subunit A OS=Bos taurus GN=EIF3A PE=3 SV=2
	tr|E1B7F6|E1B7F6_BOVIN	Uncharacterized protein OS=Bos taurus GN=PLXNB1 PE=4 SV=2
	tr|E1B726|E1B726_BOVIN	Plasminogen OS=Bos taurus GN=PLG PE=2 SV=2
	tr|E1B6Y1|E1B6Y1_BOVIN	Uncharacterized protein OS=Bos taurus GN=CCDC90A PE=4 SV=2
	tr|D3JUI8|D3JUI8_BOVIN	RNA-binding motif protein, X chromosome OS=Bos taurus GN=RBMX PE=2 SV=1
	tr|C4T8B4|C4T8B4_BOVIN	C-reactive protein OS=Bos taurus GN=CRP PE=2 SV=1
	tr|B0JYL6|B0JYL6_BOVIN	Signal transducer and activator of transcription OS=Bos taurus GN=STAT1 PE=2 SV=1
	tr|A8YXZ2|A8YXZ2_BOVIN	C8G protein OS=Bos taurus GN=C8G PE=2 SV=1
	tr|A8E4P2|A8E4P2_BOVIN	FARSB protein OS=Bos taurus GN=FARSB PE=2 SV=1
	tr|A7Z081|A7Z081_BOVIN	C3H1ORF92 protein OS=Bos taurus GN=C3H1ORF92 PE=2 SV=1
	tr|A7Z057|A7Z057_BOVIN	14-3-3 protein gamma OS=Bos taurus GN=YWHAG PE=2 SV=1
	tr|A7Z055|A7Z055_BOVIN	PLAA protein OS=Bos taurus GN=PLAA PE=2 SV=1
	tr|A7Z051|A7Z051_BOVIN	SAPS3 protein OS=Bos taurus GN=SAPS3 PE=2 SV=1
	tr|A7Z037|A7Z037_BOVIN	CHN1 protein OS=Bos taurus GN=CHN1 PE=2 SV=1
	tr|A7Z024|A7Z024_BOVIN	RP2 protein OS=Bos taurus GN=RP2 PE=2 SV=1
	tr|A7Z014|A7Z014_BOVIN	Transketolase OS=Bos taurus GN=TKT PE=2 SV=1
	tr|A7YY43|A7YY43_BOVIN	DUSP3 protein OS=Bos taurus GN=DUSP3 PE=2 SV=1
	tr|A7YY24|A7YY24_BOVIN	IGBP1 protein OS=Bos taurus GN=IGBP1 PE=2 SV=1
	tr|A7YWC6|A7YWC6_BOVIN	SUB1 protein OS=Bos taurus GN=SUB1 PE=2 SV=1
	tr|A7MBI5|A7MBI5_BOVIN	DPYSL3 protein OS=Bos taurus GN=DPYSL3 PE=2 SV=1
	tr|A7MBH9|A7MBH9_BOVIN	GNAI2 protein OS=Bos taurus GN=GNAI2 PE=2 SV=1
	tr|A7MBG8|A7MBG8_BOVIN	RUVBL1 protein OS=Bos taurus GN=RUVBL1 PE=2 SV=1
	tr|A7MBD4|A7MBD4_BOVIN	FARSA protein OS=Bos taurus GN=FARSA PE=2 SV=1
	tr|A7MBC5|A7MBC5_BOVIN	IARS protein OS=Bos taurus GN=IARS PE=2 SV=1
	tr|A7MBA2|A7MBA2_BOVIN	PSMD1 protein OS=Bos taurus GN=PSMD1 PE=2 SV=1
	tr|A7MB57|A7MB57_BOVIN	Uncharacterized protein OS=Bos taurus GN=YES1 PE=2 SV=1
	tr|A7MB18|A7MB18_BOVIN	NTN4 protein OS=Bos taurus GN=NTN4 PE=2 SV=1
	tr|A7E3T7|A7E3T7_BOVIN	S-adenosylmethionine synthase OS=Bos taurus GN=MAT2A PE=2 SV=1
	tr|A7E3S8|A7E3S8_BOVIN	Heat shock 70kD protein binding protein OS=Bos taurus GN=ST13 PE=2 SV=1
	tr|A6QR68|A6QR68_BOVIN	SLC31A1 protein OS=Bos taurus GN=SLC31A1 PE=2 SV=1
	tr|A6QR61|A6QR61_BOVIN	SNX12 protein OS=Bos taurus GN=SNX12 PE=2 SV=1
	tr|A6QR52|A6QR52_BOVIN	ACOT11 protein OS=Bos taurus GN=ACOT11 PE=2 SV=1
	tr|A6QR35|A6QR35_BOVIN	SCAMP2 protein OS=Bos taurus GN=SCAMP2 PE=2 SV=1
	tr|A6QR28|A6QR28_BOVIN	Phosphoserine aminotransferase OS=Bos taurus GN=PSAT1 PE=2 SV=1
	tr|A6QR15|A6QR15_BOVIN	LOC535277 protein OS=Bos taurus GN=LOC535277 PE=2 SV=1
	tr|A6QQP0|A6QQP0_BOVIN	MYEF2 protein OS=Bos taurus GN=MYEF2 PE=2 SV=1
	tr|A6QQ11|A6QQ11_BOVIN	PGM2 protein (Fragment) OS=Bos taurus GN=PGM2 PE=2 SV=1
	tr|A6QPZ0|A6QPZ0_BOVIN	CSTB protein OS=Bos taurus GN=CSTB PE=4 SV=1
	tr|A6QPS1|A6QPS1_BOVIN	PPCS protein OS=Bos taurus GN=PPCS PE=2 SV=1
	tr|A6QPP2|A6QPP2_BOVIN	SERPIND1 protein OS=Bos taurus GN=SERPIND1 PE=2 SV=1
	tr|A6QP44|A6QP44_BOVIN	FUK protein OS=Bos taurus GN=FUK PE=2 SV=1
	tr|A6QP40|A6QP40_BOVIN	LRRFIP1 protein OS=Bos taurus GN=LRRFIP1 PE=2 SV=1
	tr|A6QP39|A6QP39_BOVIN	MSLN protein OS=Bos taurus GN=MSLN PE=2 SV=1
	tr|A6QP30|A6QP30_BOVIN	CPN2 protein OS=Bos taurus GN=CPN2 PE=2 SV=1
	tr|A6QNZ5|A6QNZ5_BOVIN	MGC151537 protein OS=Bos taurus GN=MGC151537 PE=2 SV=1
	tr|A6QNL5|A6QNL5_BOVIN	PDIA6 protein (Fragment) OS=Bos taurus GN=PDIA6 PE=2 SV=1
	tr|A6QLZ0|A6QLZ0_BOVIN	Galectin OS=Bos taurus GN=LGALS3 PE=2 SV=1
	tr|A6QLT9|A6QLT9_BOVIN	AARS protein OS=Bos taurus GN=AARS PE=2 SV=1
	tr|A6QLS9|A6QLS9_BOVIN	RAB10 protein OS=Bos taurus GN=RAB10 PE=2 SV=1
	tr|A6QLR2|A6QLR2_BOVIN	LARS protein OS=Bos taurus GN=LARS PE=2 SV=1
	tr|A6QLL8|A6QLL8_BOVIN	Fructose-bisphosphate aldolase OS=Bos taurus GN=ALDOA PE=2 SV=1
	tr|A6QLG1|A6QLG1_BOVIN	LOC515358 protein OS=Bos taurus GN=LOC515358 PE=2 SV=1
	tr|A6QLF9|A6QLF9_BOVIN	BBS5 protein OS=Bos taurus GN=BBS5 PE=2 SV=1
	tr|A6QLD6|A6QLD6_BOVIN	MYO1B protein OS=Bos taurus GN=MYO1B PE=2 SV=1
	tr|A6QLB7|A6QLB7_BOVIN	Adenylyl cyclase-associated protein OS=Bos taurus GN=CAP1 PE=2 SV=1
	tr|A6QLA8|A6QLA8_BOVIN	TRIM25 protein OS=Bos taurus GN=TRIM25 PE=2 SV=1
	tr|A6H7J6|A6H7J6_BOVIN	P4HB protein OS=Bos taurus GN=P4HB PE=2 SV=1
	tr|A6H7E3|A6H7E3_BOVIN	PDZ and LIM domain 1 OS=Bos taurus GN=PDLIM1 PE=2 SV=1
	tr|A6H7A2|A6H7A2_BOVIN	Adenosine deaminase OS=Bos taurus GN=ADA PE=2 SV=1
	tr|A5PKK0|A5PKK0_BOVIN	FAM151B protein OS=Bos taurus GN=FAM151B PE=2 SV=1
	tr|A5PKI0|A5PKI0_BOVIN	APPL1 protein OS=Bos taurus GN=APPL1 PE=2 SV=1
	tr|A5PKC2|A5PKC2_BOVIN	SHBG protein OS=Bos taurus GN=SHBG PE=2 SV=1
	tr|A5PK96|A5PK96_BOVIN	ACP1 protein OS=Bos taurus GN=ACP1 PE=2 SV=1
	tr|A5PJY9|A5PJY9_BOVIN	CPNE3 protein OS=Bos taurus GN=CPNE3 PE=2 SV=1
	tr|A5PJX0|A5PJX0_BOVIN	FBXO22 protein OS=Bos taurus GN=FBXO22 PE=2 SV=1
	tr|A5PJT7|A5PJT7_BOVIN	ECM1 protein OS=Bos taurus GN=ECM1 PE=2 SV=1
	tr|A5PJE3|A5PJE3_BOVIN	Fibrinogen alpha chain OS=Bos taurus GN=FGA PE=2 SV=1
	tr|A5PJ69|A5PJ69_BOVIN	SERPINA10 protein OS=Bos taurus GN=SERPINA10 PE=2 SV=1
	tr|A5D9H5|A5D9H5_BOVIN	Heterogeneous nuclear ribonucleoprotein D OS=Bos taurus GN=HNRPD PE=2 SV=1
	tr|A5D9E9|A5D9E9_BOVIN	Complement component 1, r subcomponent OS=Bos taurus GN=C1R PE=2 SV=1
	tr|A5D984|A5D984_BOVIN	Pyruvate kinase OS=Bos taurus GN=PKM2 PE=2 SV=1
	tr|A5D973|A5D973_BOVIN	Alpha isoform of regulatory subunit A, protein phosphatase 2 OS=Bos taurus GN=PPP2R1A PE=2 SV=1
	tr|A5D7V3|A5D7V3_BOVIN	ESM1 protein OS=Bos taurus GN=ESM1 PE=2 SV=1
	tr|A5D7P3|A5D7P3_BOVIN	Platelet-activating factor acetylhydrolase IB subunit alpha OS=Bos taurus GN=PAFAH1B1 PE=2 SV=1
	tr|A5D7L4|A5D7L4_BOVIN	LOC781700 protein OS=Bos taurus GN=LOC781700 PE=2 SV=1
	tr|A5D7K0|A5D7K0_BOVIN	BLVRA protein OS=Bos taurus GN=BLVRA PE=2 SV=1
	tr|A5D7J6|A5D7J6_BOVIN	CALR protein OS=Bos taurus GN=CALR PE=2 SV=1
	tr|A5D7H6|A5D7H6_BOVIN	KLRAQ1 protein OS=Bos taurus GN=KLRAQ1 PE=2 SV=1
	tr|A5D7E8|A5D7E8_BOVIN	PDIA3 protein OS=Bos taurus GN=PDIA3 PE=2 SV=1
	tr|A5D7E6|A5D7E6_BOVIN	CD82 protein OS=Bos taurus GN=CD82 PE=2 SV=1
	tr|A5D7A2|A5D7A2_BOVIN	GARS protein OS=Bos taurus GN=GARS PE=2 SV=1
	tr|A4IFV2|A4IFV2_BOVIN	CA8 protein OS=Bos taurus GN=CA8 PE=2 SV=1
	tr|A4IFN7|A4IFN7_BOVIN	UBE3A protein OS=Bos taurus GN=UBE3A PE=2 SV=1
	tr|A4IFE6|A4IFE6_BOVIN	ABCE1 protein OS=Bos taurus GN=ABCE1 PE=2 SV=1
	tr|A4IFD1|A4IFD1_BOVIN	PDCD4 protein OS=Bos taurus GN=PDCD4 PE=2 SV=1
	tr|A4IFC3|A4IFC3_BOVIN	PABPC4 protein OS=Bos taurus GN=PABPC4 PE=2 SV=1
	tr|A4IFB8|A4IFB8_BOVIN	IPO4 protein OS=Bos taurus GN=IPO4 PE=2 SV=1
	tr|A4FV69|A4FV69_BOVIN	SERPINB5 protein OS=Bos taurus GN=SERPINB5 PE=2 SV=1
	tr|A4FV23|A4FV23_BOVIN	DDX21 protein OS=Bos taurus GN=DDX21 PE=2 SV=1
	tr|A4FUZ3|A4FUZ3_BOVIN	Proteasome (Prosome, macropain) 26S subunit, ATPase, 1 OS=Bos taurus GN=PSMC1 PE=2 SV=1
	tr|A4FUZ1|A4FUZ1_BOVIN	GLO1 protein OS=Bos taurus GN=GLO1 PE=2 SV=1
	tr|A4FUD0|A4FUD0_BOVIN	MTHFD1 protein OS=Bos taurus GN=MTHFD1 PE=2 SV=1
	tr|A4FUC8|A4FUC8_BOVIN	CARS protein OS=Bos taurus GN=CARS PE=2 SV=1
	tr|A3KN51|A3KN51_BOVIN	TSG101 protein OS=Bos taurus GN=TSG101 PE=2 SV=1
	tr|A3KLR9|A3KLR9_BOVIN	Superoxide dismutase [Cu-Zn] OS=Bos taurus GN=ECSOD PE=2 SV=1
	tr|A2VE92|A2VE92_BOVIN	CD55 protein OS=Bos taurus GN=CD55 PE=2 SV=1
	tr|A2VE41|A2VE41_BOVIN	EGF-containing fibulin-like extracellular matrix protein 1 OS=Bos taurus GN=EFEMP1 PE=2 SV=1
	tr|A2VDW0|A2VDW0_BOVIN	Lymphocyte antigen 6 complex, locus G6E OS=Bos taurus GN=LY6G6E PE=2 SV=1
	tr|A2VDQ0|A2VDQ0_BOVIN	Intraflagellar transport 81 homolog (Chlamydomonas) OS=Bos taurus GN=IFT81 PE=2 SV=1
	tr|A1L5B7|A1L5B7_BOVIN	SERPINE1 mRNA binding protein 1 OS=Bos taurus GN=SERBP1 PE=2 SV=1
	tr|A1L579|A1L579_BOVIN	Oviduct-specific glycoprotein OS=Bos taurus GN=OVGP1 PE=2 SV=1
	tr|A1L528|A1L528_BOVIN	RAB1A, member RAS oncogene family OS=Bos taurus GN=RAB1A PE=2 SV=1
	tr|A1A4L7|A1A4L7_BOVIN	Glutathione S-transferase Mu 1 OS=Bos taurus GN=GSTM4 PE=2 SV=1
	tr|A1A4I8|A1A4I8_BOVIN	Uncharacterized protein OS=Bos taurus GN=XPO7 PE=2 SV=1
	tr|A0JNE9|A0JNE9_BOVIN	CTP synthase OS=Bos taurus GN=CTPS PE=2 SV=1
	tr|A0JN77|A0JN77_BOVIN	Bifunctional ATP-dependent dihydroxyacetone kinase/FAD-AMP lyase (cyclizing) OS=Bos taurus GN=DAK PE=2 SV=1
	sp|Q9XTA2|PPCE_BOVIN	Prolyl endopeptidase OS=Bos taurus GN=PREP PE=2 SV=1
	sp|Q9XSK7|HDGF_BOVIN	Hepatoma-derived growth factor OS=Bos taurus GN=HDGF PE=2 SV=1
	sp|Q9XSJ4|ENOA_BOVIN	Alpha-enolase OS=Bos taurus GN=ENO1 PE=1 SV=4
	sp|Q9XSI3|RL10_BOVIN	60S ribosomal protein L10 OS=Bos taurus GN=RPL10 PE=2 SV=4
	sp|Q9XSG3|IDHC_BOVIN	Isocitrate dehydrogenase [NADP] cytoplasmic OS=Bos taurus GN=IDH1 PE=2 SV=1
	sp|Q9XSA7|CLIC4_BOVIN	Chloride intracellular channel protein 4 OS=Bos taurus GN=CLIC4 PE=2 SV=3
	sp|Q9TTE1|SPA31_BOVIN	Serpin A3-1 OS=Bos taurus GN=SERPINA3-1 PE=1 SV=3
	sp|Q9TT36|THBG_BOVIN	Thyroxine-binding globulin OS=Bos taurus GN=SERPINA7 PE=2 SV=1
	sp|Q9TRY0|FKBP4_BOVIN	Peptidyl-prolyl cis-trans isomerase FKBP4 OS=Bos taurus GN=FKBP4 PE=1 SV=4
	sp|Q9TR36|PIPNB_BOVIN	Phosphatidylinositol transfer protein beta isoform OS=Bos taurus GN=PITPNB PE=1 SV=3
	sp|Q9N2I2|IPSP_BOVIN	Plasma serine protease inhibitor OS=Bos taurus GN=SERPINA5 PE=1 SV=1
	sp|Q9N0V4|GSTM1_BOVIN	Glutathione S-transferase Mu 1 OS=Bos taurus GN=GSTM1 PE=1 SV=3
	sp|Q9N0T5|IF4E_BOVIN	Eukaryotic translation initiation factor 4E OS=Bos taurus GN=EIF4E PE=2 SV=2
	sp|Q9N0K1|CD47_BOVIN	Leukocyte surface antigen CD47 OS=Bos taurus GN=CD47 PE=2 SV=1
	sp|Q9MZ08|BCAM_BOVIN	Basal cell adhesion molecule OS=Bos taurus GN=BCAM PE=2 SV=2
	sp|Q9HWK6|LYSC_PSEAE	Lysyl endopeptidase OS=Pseudomonas aeruginosa (strain ATCC 15692 / PAO1 / 1C / PRS 101 / LMG 12228) GN=prpL PE=1 SV=1
	sp|Q9GMB8|SYSC_BOVIN	Serine--tRNA ligase, cytoplasmic OS=Bos taurus GN=SARS PE=2 SV=3
	sp|Q9GKN8|PRELP_BOVIN	Prolargin OS=Bos taurus GN=PRELP PE=2 SV=1
	sp|Q9BGI3|PRDX2_BOVIN	Peroxiredoxin-2 OS=Bos taurus GN=PRDX2 PE=2 SV=1
	sp|Q9BGI2|PRDX4_BOVIN	Peroxiredoxin-4 OS=Bos taurus GN=PRDX4 PE=2 SV=1
	sp|Q9BGI1|PRDX5_BOVIN	Peroxiredoxin-5, mitochondrial OS=Bos taurus GN=PRDX5 PE=2 SV=2
	sp|Q95M18|ENPL_BOVIN	Endoplasmin OS=Bos taurus GN=HSP90B1 PE=2 SV=1
	sp|Q95L54|ANXA8_BOVIN	Annexin A8 OS=Bos taurus GN=ANXA8 PE=2 SV=1
	sp|Q95140|RLA0_BOVIN	60S acidic ribosomal protein P0 OS=Bos taurus GN=RPLP0 PE=2 SV=3
	sp|Q95121|PEDF_BOVIN	Pigment epithelium-derived factor OS=Bos taurus GN=SERPINF1 PE=1 SV=1
	sp|Q95114|MFGM_BOVIN	Lactadherin OS=Bos taurus GN=MFGE8 PE=1 SV=2
	sp|Q95107|WASL_BOVIN	Neural Wiskott-Aldrich syndrome protein OS=Bos taurus GN=WASL PE=1 SV=1
	sp|Q8WN55|PTBP1_BOVIN	Polypyrimidine tract-binding protein 1 OS=Bos taurus GN=PTBP1 PE=2 SV=1
	sp|Q8WMY2|FPPS_BOVIN	Farnesyl pyrophosphate synthase OS=Bos taurus GN=FDPS PE=1 SV=1
	sp|Q8WML4|MUC1_BOVIN	Mucin-1 OS=Bos taurus GN=MUC1 PE=1 SV=1
	sp|Q8SPP7|PGRP1_BOVIN	Peptidoglycan recognition protein 1 OS=Bos taurus GN=PGLYRP1 PE=1 SV=1
	sp|Q8MKF0|L2GL1_BOVIN	Lethal(2) giant larvae protein homolog 1 OS=Bos taurus GN=LLGL1 PE=2 SV=1
	sp|Q8MJ50|OSTF1_BOVIN	Osteoclast-stimulating factor 1 OS=Bos taurus GN=OSTF1 PE=2 SV=1
	sp|Q8HYI9|PFD5_BOVIN	Prefoldin subunit 5 OS=Bos taurus GN=PFDN5 PE=2 SV=1
	sp|Q864V4|UPK3B_BOVIN	Uroplakin-3b OS=Bos taurus GN=UPK3B PE=1 SV=1
	sp|Q863D4|KCNRG_BOVIN	Potassium channel regulatory protein OS=Bos taurus GN=KCNRG PE=2 SV=1
	sp|Q863B3|SND1_BOVIN	Staphylococcal nuclease domain-containing protein 1 OS=Bos taurus GN=SND1 PE=1 SV=1
	sp|Q862I1|RL24_BOVIN	60S ribosomal protein L24 OS=Bos taurus GN=RPL24 PE=2 SV=2
	sp|Q7YRQ8|TFPI2_BOVIN	Tissue factor pathway inhibitor 2 OS=Bos taurus GN=TFPI2 PE=2 SV=1
	sp|Q7SIH1|A2MG_BOVIN	Alpha-2-macroglobulin OS=Bos taurus GN=A2M PE=1 SV=2
	sp|Q76LV2|HS90A_BOVIN	Heat shock protein HSP 90-alpha OS=Bos taurus GN=HSP90AA1 PE=1 SV=3
	sp|Q76LV1|HS90B_BOVIN	Heat shock protein HSP 90-beta OS=Bos taurus GN=HSP90AB1 PE=2 SV=3
	sp|Q76I82|RS15A_BOVIN	40S ribosomal protein S15a OS=Bos taurus GN=RPS15A PE=2 SV=1
	sp|Q76I81|RS12_BOVIN	40S ribosomal protein S12 OS=Bos taurus GN=RPS12 PE=2 SV=1
	sp|Q71SP7|FAS_BOVIN	Fatty acid synthase OS=Bos taurus GN=FASN PE=2 SV=1
	sp|Q6QRN6|NNRE_BOVIN	NAD(P)H-hydrate epimerase OS=Bos taurus GN=APOA1BP PE=2 SV=1
	sp|Q6Q137|SEPT7_BOVIN	Septin-7 OS=Bos taurus GN=SEPT7 PE=2 SV=2
	sp|Q6EWQ7|IF5A1_BOVIN	Eukaryotic translation initiation factor 5A-1 OS=Bos taurus GN=EIF5A PE=2 SV=3
	sp|Q6B857|CP080_BOVIN	UPF0468 protein C16orf80 homolog OS=Bos taurus PE=2 SV=1
	sp|Q6B856|TBB2B_BOVIN	Tubulin beta-2B chain OS=Bos taurus GN=TUBB2B PE=1 SV=2
	sp|Q6B855|TKT_BOVIN	Transketolase OS=Bos taurus GN=TKT PE=2 SV=1
	sp|Q5XQN5|K2C5_BOVIN	Keratin, type II cytoskeletal 5 OS=Bos taurus GN=KRT5 PE=1 SV=1
	sp|Q5KR49|TPM1_BOVIN	Tropomyosin alpha-1 chain OS=Bos taurus GN=TPM1 PE=2 SV=1
	sp|Q5KR47|TPM3_BOVIN	Tropomyosin alpha-3 chain OS=Bos taurus GN=TPM3 PE=2 SV=1
	sp|Q5EAE6|DAP1_BOVIN	Death-associated protein 1 OS=Bos taurus GN=DAP PE=3 SV=3
	sp|Q5EAD6|RL15_BOVIN	60S ribosomal protein L15 OS=Bos taurus GN=RPL15 PE=2 SV=3
	sp|Q5EAD2|SERA_BOVIN	D-3-phosphoglycerate dehydrogenase OS=Bos taurus GN=PHGDH PE=2 SV=3
	sp|Q5EAD0|BAIP2_BOVIN	Brain-specific angiogenesis inhibitor 1-associated protein 2 OS=Bos taurus GN=BAIAP2 PE=2 SV=1
	sp|Q5EAC6|CDC37_BOVIN	Hsp90 co-chaperone Cdc37 OS=Bos taurus GN=CDC37 PE=2 SV=1
	sp|Q5EAC2|GSHB_BOVIN	Glutathione synthetase OS=Bos taurus GN=GSS PE=2 SV=1
	sp|Q5EA95|IFT57_BOVIN	Intraflagellar transport protein 57 homolog OS=Bos taurus GN=IFT57 PE=1 SV=1
	sp|Q5EA79|GALM_BOVIN	Aldose 1-epimerase OS=Bos taurus GN=GALM PE=2 SV=1
	sp|Q5EA61|KCRB_BOVIN	Creatine kinase B-type OS=Bos taurus GN=CKB PE=2 SV=1
	sp|Q5EA01|B3GN1_BOVIN	N-acetyllactosaminide beta-1,3-N-acetylglucosaminyltransferase OS=Bos taurus GN=B3GNT1 PE=2 SV=2
	sp|Q5E9X4|LRC59_BOVIN	Leucine-rich repeat-containing protein 59 OS=Bos taurus GN=LRRC59 PE=2 SV=1
	sp|Q5E9T9|RTCB_BOVIN	tRNA-splicing ligase RtcB homolog OS=Bos taurus GN=RTCB PE=2 SV=1
	sp|Q5E9R3|EHD1_BOVIN	EH domain-containing protein 1 OS=Bos taurus GN=EHD1 PE=1 SV=1
	sp|Q5E9K0|PSB2_BOVIN	Proteasome subunit beta type-2 OS=Bos taurus GN=PSMB2 PE=1 SV=1
	sp|Q5E9J1|HNRPF_BOVIN	Heterogeneous nuclear ribonucleoprotein F OS=Bos taurus GN=HNRNPF PE=2 SV=3
	sp|Q5E9I7|MEP50_BOVIN	Methylosome protein 50 OS=Bos taurus GN=WDR77 PE=2 SV=1
	sp|Q5E9G3|PSME2_BOVIN	Proteasome activator complex subunit 2 OS=Bos taurus GN=PSME2 PE=1 SV=3
	sp|Q5E9F9|PRS7_BOVIN	26S protease regulatory subunit 7 OS=Bos taurus GN=PSMC2 PE=2 SV=3
	sp|Q5E9F7|COF1_BOVIN	Cofilin-1 OS=Bos taurus GN=CFL1 PE=2 SV=3
	sp|Q5E9F5|TAGL2_BOVIN	Transgelin-2 OS=Bos taurus GN=TAGLN2 PE=2 SV=3
	sp|Q5E9E6|RL10A_BOVIN	60S ribosomal protein L10a OS=Bos taurus GN=RPL10A PE=2 SV=3
	sp|Q5E9D5|DEST_BOVIN	Destrin OS=Bos taurus GN=DSTN PE=2 SV=3
	sp|Q5E9D0|IF2B_BOVIN	Eukaryotic translation initiation factor 2 subunit 2 OS=Bos taurus GN=EIF2S2 PE=2 SV=1
	sp|Q5E9B7|CLIC1_BOVIN	Chloride intracellular channel protein 1 OS=Bos taurus GN=CLIC1 PE=2 SV=3
	sp|Q5E9B5|ACTH_BOVIN	Actin, gamma-enteric smooth muscle OS=Bos taurus GN=ACTG2 PE=2 SV=1
	sp|Q5E9B1|LDHB_BOVIN	L-lactate dehydrogenase B chain OS=Bos taurus GN=LDHB PE=2 SV=4
	sp|Q5E9A3|PCBP1_BOVIN	Poly(rC)-binding protein 1 OS=Bos taurus GN=PCBP1 PE=2 SV=1
	sp|Q5E9A1|NACA_BOVIN	Nascent polypeptide-associated complex subunit alpha OS=Bos taurus GN=NACA PE=1 SV=1
	sp|Q5E997|CAZA2_BOVIN	F-actin-capping protein subunit alpha-2 OS=Bos taurus GN=CAPZA2 PE=1 SV=3
	sp|Q5E995|RS6_BOVIN	40S ribosomal protein S6 OS=Bos taurus GN=RPS6 PE=2 SV=1
	sp|Q5E992|PPIL1_BOVIN	Peptidyl-prolyl cis-trans isomerase-like 1 OS=Bos taurus GN=PPIL1 PE=2 SV=1
	sp|Q5E988|RS5_BOVIN	40S ribosomal protein S5 OS=Bos taurus GN=RPS5 PE=2 SV=3
	sp|Q5E987|PSA5_BOVIN	Proteasome subunit alpha type-5 OS=Bos taurus GN=PSMA5 PE=1 SV=1
	sp|Q5E984|TCTP_BOVIN	Translationally-controlled tumor protein OS=Bos taurus GN=TPT1 PE=2 SV=1
	sp|Q5E983|EF1B_BOVIN	Elongation factor 1-beta OS=Bos taurus GN=EEF1B PE=2 SV=3
	sp|Q5E973|RL18_BOVIN	60S ribosomal protein L18 OS=Bos taurus GN=RPL18 PE=2 SV=3
	sp|Q5E971|TMEDA_BOVIN	Transmembrane emp24 domain-containing protein 10 OS=Bos taurus GN=TMED10 PE=2 SV=1
	sp|Q5E966|EIF3I_BOVIN	Eukaryotic translation initiation factor 3 subunit I OS=Bos taurus GN=EIF3I PE=2 SV=1
	sp|Q5E964|PSD13_BOVIN	26S proteasome non-ATPase regulatory subunit 13 OS=Bos taurus GN=PSMD13 PE=2 SV=1
	sp|Q5E963|ARP5L_BOVIN	Actin-related protein 2/3 complex subunit 5-like protein OS=Bos taurus GN=ARPC5L PE=2 SV=1
	sp|Q5E959|STRAP_BOVIN	Serine-threonine kinase receptor-associated protein OS=Bos taurus GN=STRAP PE=2 SV=1
	sp|Q5E958|RS8_BOVIN	40S ribosomal protein S8 OS=Bos taurus GN=RPS8 PE=2 SV=3
	sp|Q5E956|TPIS_BOVIN	Triosephosphate isomerase OS=Bos taurus GN=TPI1 PE=2 SV=3
	sp|Q5E954|DNJA1_BOVIN	DnaJ homolog subfamily A member 1 OS=Bos taurus GN=DNAJA1 PE=2 SV=2
	sp|Q5E953|UFC1_BOVIN	Ubiquitin-fold modifier-conjugating enzyme 1 OS=Bos taurus GN=UFC1 PE=2 SV=1
	sp|Q5E951|TBCB_BOVIN	Tubulin-folding cofactor B OS=Bos taurus GN=TBCB PE=2 SV=1
	sp|Q5E947|PRDX1_BOVIN	Peroxiredoxin-1 OS=Bos taurus GN=PRDX1 PE=2 SV=1
	sp|Q5E946|PARK7_BOVIN	Protein DJ-1 OS=Bos taurus GN=PARK7 PE=2 SV=1
	sp|Q5E938|EIF1_BOVIN	Eukaryotic translation initiation factor 1 OS=Bos taurus GN=EIF1 PE=3 SV=1
	sp|Q5BIR5|SPB8_BOVIN	Serpin B8 OS=Bos taurus GN=SERPINB8 PE=2 SV=1
	sp|Q5BIN5|PIN1_BOVIN	Peptidyl-prolyl cis-trans isomerase NIMA-interacting 1 OS=Bos taurus GN=PIN1 PE=2 SV=1
	sp|Q5BIM1|TRI45_BOVIN	Tripartite motif-containing protein 45 OS=Bos taurus GN=TRIM45 PE=2 SV=1
	sp|Q59A32|PUR2_BOVIN	Trifunctional purine biosynthetic protein adenosine-3 OS=Bos taurus GN=GART PE=2 SV=1
	sp|Q59A28|QORL1_BOVIN	Quinone oxidoreductase-like protein 1 OS=Bos taurus GN=CRYZL1 PE=2 SV=1
	sp|Q58DW5|RL5_BOVIN	60S ribosomal protein L5 OS=Bos taurus GN=RPL5 PE=2 SV=3
	sp|Q58DW3|RL29_BOVIN	60S ribosomal protein L29 OS=Bos taurus GN=RPL29 PE=2 SV=3
	sp|Q58DW0|RL4_BOVIN	60S ribosomal protein L4 OS=Bos taurus GN=RPL4 PE=2 SV=3
	sp|Q58DV7|HNMT_BOVIN	Histamine N-methyltransferase OS=Bos taurus GN=HNMT PE=2 SV=1
	sp|Q58DU7|SH3L1_BOVIN	SH3 domain-binding glutamic acid-rich-like protein OS=Bos taurus GN=SH3BGRL PE=3 SV=1
	sp|Q58DU5|PSA3_BOVIN	Proteasome subunit alpha type-3 OS=Bos taurus GN=PSMA3 PE=1 SV=3
	sp|Q58DT1|RL7_BOVIN	60S ribosomal protein L7 OS=Bos taurus GN=RPL7 PE=2 SV=1
	sp|Q58DS9|RAB5C_BOVIN	Ras-related protein Rab-5C OS=Bos taurus GN=RAB5C PE=2 SV=1
	sp|Q58DS5|RAB13_BOVIN	Ras-related protein Rab-13 OS=Bos taurus GN=RAB13 PE=1 SV=1
	sp|Q58DQ3|RL6_BOVIN	60S ribosomal protein L6 OS=Bos taurus GN=RPL6 PE=2 SV=3
	sp|Q58DN4|PPME1_BOVIN	Protein phosphatase methylesterase 1 OS=Bos taurus GN=PPME1 PE=2 SV=3
	sp|Q58DK5|HEM2_BOVIN	Delta-aminolevulinic acid dehydratase OS=Bos taurus GN=ALAD PE=2 SV=1
	sp|Q58DC0|CPPED_BOVIN	Calcineurin-like phosphoesterase domain-containing protein 1 OS=Bos taurus GN=CPPED1 PE=2 SV=1
	sp|Q58DA0|PSMD4_BOVIN	26S proteasome non-ATPase regulatory subunit 4 OS=Bos taurus GN=PSMD4 PE=2 SV=1
	sp|Q58D84|FSTL1_BOVIN	Follistatin-related protein 1 OS=Bos taurus GN=FSTL1 PE=2 SV=1
	sp|Q58D62|FETUB_BOVIN	Fetuin-B OS=Bos taurus GN=FETUB PE=2 SV=1
	sp|Q58D31|DHSO_BOVIN	Sorbitol dehydrogenase OS=Bos taurus GN=SORD PE=2 SV=3
	sp|Q58D08|P5CR3_BOVIN	Pyrroline-5-carboxylate reductase 3 OS=Bos taurus GN=PYCRL PE=2 SV=1
	sp|Q58CY6|PGFS_BOVIN	Prostamide/prostaglandin F synthase OS=Bos taurus GN=FAM213B PE=2 SV=1
	sp|Q58CU2|E41L5_BOVIN	Band 4.1-like protein 5 OS=Bos taurus GN=EPB41L5 PE=2 SV=1
	sp|Q58CQ9|VNN1_BOVIN	Pantetheinase OS=Bos taurus GN=VNN1 PE=2 SV=1
	sp|Q58CQ2|ARC1B_BOVIN	Actin-related protein 2/3 complex subunit 1B OS=Bos taurus GN=ARPC1B PE=1 SV=4
	sp|Q56K14|RLA1_BOVIN	60S acidic ribosomal protein P1 OS=Bos taurus GN=RPLP1 PE=3 SV=1
	sp|Q56K10|RS15_BOVIN	40S ribosomal protein S15 OS=Bos taurus GN=RPS15 PE=2 SV=3
	sp|Q56K04|CRIP1_BOVIN	Cysteine-rich protein 1 OS=Bos taurus GN=CRIP1 PE=3 SV=3
	sp|Q56K03|RL27A_BOVIN	60S ribosomal protein L27a OS=Bos taurus GN=RPL27A PE=2 SV=3
	sp|Q56JZ5|EIF3H_BOVIN	Eukaryotic translation initiation factor 3 subunit H OS=Bos taurus GN=EIF3H PE=2 SV=1
	sp|Q56JZ1|RL13_BOVIN	60S ribosomal protein L13 OS=Bos taurus GN=RPL13 PE=2 SV=3
	sp|Q56JY1|RL35A_BOVIN	60S ribosomal protein L35a OS=Bos taurus GN=RPL35A PE=3 SV=1
	sp|Q56JX8|RS13_BOVIN	40S ribosomal protein S13 OS=Bos taurus GN=RPS13 PE=2 SV=3
	sp|Q56JX6|RS28_BOVIN	40S ribosomal protein S28 OS=Bos taurus GN=RPS28 PE=3 SV=1
	sp|Q56JX5|RS25_BOVIN	40S ribosomal protein S25 OS=Bos taurus GN=RPS25 PE=2 SV=1
	sp|Q56JX3|RL31_BOVIN	60S ribosomal protein L31 OS=Bos taurus GN=RPL31 PE=2 SV=1
	sp|Q56JW4|APT_BOVIN	Adenine phosphoribosyltransferase OS=Bos taurus GN=APRT PE=2 SV=1
	sp|Q56JV9|RS3A_BOVIN	40S ribosomal protein S3a OS=Bos taurus GN=RPS3A PE=2 SV=3
	sp|Q56JV6|TWF1_BOVIN	Twinfilin-1 OS=Bos taurus GN=TWF1 PE=2 SV=1
	sp|Q56JV1|RS26_BOVIN	40S ribosomal protein S26 OS=Bos taurus GN=RPS26 PE=3 SV=3
	sp|Q56JU9|RS24_BOVIN	40S ribosomal protein S24 OS=Bos taurus GN=RPS24 PE=2 SV=2
	sp|Q3ZCL8|SH3L3_BOVIN	SH3 domain-binding glutamic acid-rich-like protein 3 OS=Bos taurus GN=SH3BGRL3 PE=3 SV=1
	sp|Q3ZCK9|PSA4_BOVIN	Proteasome subunit alpha type-4 OS=Bos taurus GN=PSMA4 PE=1 SV=1
	sp|Q3ZCK3|BPNT1_BOVIN	3'(2'),5'-bisphosphate nucleotidase 1 OS=Bos taurus GN=BPNT1 PE=2 SV=1
	sp|Q3ZCK1|EIF3L_BOVIN	Eukaryotic translation initiation factor 3 subunit L OS=Bos taurus GN=EIF3L PE=2 SV=1
	sp|Q3ZCJ2|AK1A1_BOVIN	Alcohol dehydrogenase [NADP(+)] OS=Bos taurus GN=AKR1A1 PE=2 SV=1
	sp|Q3ZCI9|TCPQ_BOVIN	T-complex protein 1 subunit theta OS=Bos taurus GN=CCT8 PE=1 SV=3
	sp|Q3ZCH9|HDHD2_BOVIN	Haloacid dehalogenase-like hydrolase domain-containing protein 2 OS=Bos taurus GN=HDHD2 PE=2 SV=1
	sp|Q3ZCH5|ZA2G_BOVIN	Zinc-alpha-2-glycoprotein OS=Bos taurus GN=AZGP1 PE=2 SV=1
	sp|Q3ZCF7|UB2D3_BOVIN	Ubiquitin-conjugating enzyme E2 D3 OS=Bos taurus GN=UBE2D3 PE=2 SV=1
	sp|Q3ZCF3|SKP1_BOVIN	S-phase kinase-associated protein 1 OS=Bos taurus GN=SKP1 PE=2 SV=1
	sp|Q3ZCF0|DCTN2_BOVIN	Dynactin subunit 2 OS=Bos taurus GN=DCTN2 PE=2 SV=1
	sp|Q3ZCE8|RBM8A_BOVIN	RNA-binding protein 8A OS=Bos taurus GN=RBM8A PE=2 SV=2
	sp|Q3ZCE0|LSM8_BOVIN	U6 snRNA-associated Sm-like protein LSm8 OS=Bos taurus GN=LSM8 PE=3 SV=3
	sp|Q3ZCC9|SEC13_BOVIN	Protein SEC13 homolog OS=Bos taurus GN=SEC13 PE=2 SV=1
	sp|Q3ZCC8|TPPP3_BOVIN	Tubulin polymerization-promoting protein family member 3 OS=Bos taurus GN=TPPP3 PE=1 SV=1
	sp|Q3ZC84|CNDP2_BOVIN	Cytosolic non-specific dipeptidase OS=Bos taurus GN=CNDP2 PE=2 SV=1
	sp|Q3ZC64|EFNA1_BOVIN	Ephrin-A1 OS=Bos taurus GN=EFNA1 PE=2 SV=1
	sp|Q3ZC55|ACTN2_BOVIN	Alpha-actinin-2 OS=Bos taurus GN=ACTN2 PE=2 SV=1
	sp|Q3ZC42|ADHX_BOVIN	Alcohol dehydrogenase class-3 OS=Bos taurus GN=ADH5 PE=2 SV=1
	sp|Q3ZC13|AP2M1_BOVIN	AP-2 complex subunit mu OS=Bos taurus GN=AP2M1 PE=1 SV=1
	sp|Q3ZC09|ENOB_BOVIN	Beta-enolase OS=Bos taurus GN=ENO3 PE=2 SV=1
	sp|Q3ZC07|ACTC_BOVIN	Actin, alpha cardiac muscle 1 OS=Bos taurus GN=ACTC1 PE=2 SV=1
	sp|Q3ZBZ8|STIP1_BOVIN	Stress-induced-phosphoprotein 1 OS=Bos taurus GN=STIP1 PE=2 SV=1
	sp|Q3ZBZ1|CAB45_BOVIN	45 kDa calcium-binding protein OS=Bos taurus GN=SDF4 PE=2 SV=1
	sp|Q3ZBV8|SYTC_BOVIN	Threonine--tRNA ligase, cytoplasmic OS=Bos taurus GN=TARS PE=2 SV=1
	sp|Q3ZBV4|HMGN3_BOVIN	High mobility group nucleosome-binding domain-containing protein 3 OS=Bos taurus GN=HMGN3 PE=2 SV=1
	sp|Q3ZBV1|IST1_BOVIN	IST1 homolog OS=Bos taurus GN=IST1 PE=2 SV=1
	sp|Q3ZBN0|ABRAL_BOVIN	Costars family protein ABRACL OS=Bos taurus GN=ABRACL PE=3 SV=1
	sp|Q3ZBM5|SNX5_BOVIN	Sorting nexin-5 OS=Bos taurus GN=SNX5 PE=2 SV=1
	sp|Q3ZBL4|LZTL1_BOVIN	Leucine zipper transcription factor-like protein 1 OS=Bos taurus GN=LZTFL1 PE=2 SV=1
	sp|Q3ZBL1|MTND_BOVIN	1,2-dihydroxy-3-keto-5-methylthiopentene dioxygenase OS=Bos taurus GN=ADI1 PE=2 SV=2
	sp|Q3ZBH8|RS20_BOVIN	40S ribosomal protein S20 OS=Bos taurus GN=RPS20 PE=3 SV=1
	sp|Q3ZBH0|TCPB_BOVIN	T-complex protein 1 subunit beta OS=Bos taurus GN=CCT2 PE=1 SV=3
	sp|Q3ZBG0|PSA7_BOVIN	Proteasome subunit alpha type-7 OS=Bos taurus GN=PSMA7 PE=1 SV=1
	sp|Q3ZBF9|PLPP_BOVIN	Pyridoxal phosphate phosphatase OS=Bos taurus GN=PDXP PE=1 SV=1
	sp|Q3ZBF7|TEBP_BOVIN	Prostaglandin E synthase 3 OS=Bos taurus GN=PTGES3 PE=1 SV=1
	sp|Q3ZBF0|NADE_BOVIN	Glutamine-dependent NAD(+) synthetase OS=Bos taurus GN=NADSYN1 PE=2 SV=1
	sp|Q3ZBD9|MARE1_BOVIN	Microtubule-associated protein RP/EB family member 1 OS=Bos taurus GN=MAPRE1 PE=2 SV=3
	sp|Q3ZBD7|G6PI_BOVIN	Glucose-6-phosphate isomerase OS=Bos taurus GN=GPI PE=2 SV=4
	sp|Q3ZBD3|PHS_BOVIN	Pterin-4-alpha-carbinolamine dehydratase OS=Bos taurus GN=PCBD1 PE=3 SV=2
	sp|Q3ZBD2|ARP10_BOVIN	Actin-related protein 10 OS=Bos taurus GN=ACTR10 PE=2 SV=1
	sp|Q3ZBD0|PSMD7_BOVIN	26S proteasome non-ATPase regulatory subunit 7 OS=Bos taurus GN=PSMD7 PE=2 SV=1
	sp|Q3ZBA8|NDRG2_BOVIN	Protein NDRG2 OS=Bos taurus GN=NDRG2 PE=2 SV=1
	sp|Q3Y5Z3|ADIPO_BOVIN	Adiponectin OS=Bos taurus GN=ADIPOQ PE=1 SV=1
	sp|Q3T199|RS23_BOVIN	40S ribosomal protein S23 OS=Bos taurus GN=RPS23 PE=2 SV=1
	sp|Q3T178|VPS28_BOVIN	Vacuolar protein sorting-associated protein 28 homolog OS=Bos taurus GN=VPS28 PE=2 SV=1
	sp|Q3T171|RL36_BOVIN	60S ribosomal protein L36 OS=Bos taurus GN=RPL36 PE=3 SV=3
	sp|Q3T169|RS3_BOVIN	40S ribosomal protein S3 OS=Bos taurus GN=RPS3 PE=2 SV=1
	sp|Q3T168|CYBP_BOVIN	Calcyclin-binding protein OS=Bos taurus GN=CACYBP PE=2 SV=1
	sp|Q3T149|HSPB1_BOVIN	Heat shock protein beta-1 OS=Bos taurus GN=HSPB1 PE=2 SV=1
	sp|Q3T147|DX39B_BOVIN	Spliceosome RNA helicase DDX39B OS=Bos taurus GN=DDX39B PE=2 SV=1
	sp|Q3T145|MDHC_BOVIN	Malate dehydrogenase, cytoplasmic OS=Bos taurus GN=MDH1 PE=2 SV=3
	sp|Q3T140|DLRB1_BOVIN	Dynein light chain roadblock-type 1 OS=Bos taurus GN=DYNLRB1 PE=3 SV=1
	sp|Q3T122|EIF3D_BOVIN	Eukaryotic translation initiation factor 3 subunit D OS=Bos taurus GN=EIF3D PE=2 SV=1
	sp|Q3T114|UK114_BOVIN	Ribonuclease UK114 OS=Bos taurus GN=HRSP12 PE=2 SV=3
	sp|Q3T108|PSB4_BOVIN	Proteasome subunit beta type-4 OS=Bos taurus GN=PSMB4 PE=1 SV=1
	sp|Q3T102|EIF3E_BOVIN	Eukaryotic translation initiation factor 3 subunit E OS=Bos taurus GN=EIF3E PE=2 SV=1
	sp|Q3T0Z7|DHPR_BOVIN	Dihydropteridine reductase OS=Bos taurus GN=QDPR PE=2 SV=1
	sp|Q3T0Y5|PSA2_BOVIN	Proteasome subunit alpha type-2 OS=Bos taurus GN=PSMA2 PE=1 SV=3
	sp|Q3T0X6|RS16_BOVIN	40S ribosomal protein S16 OS=Bos taurus GN=RPS16 PE=2 SV=3
	sp|Q3T0X5|PSA1_BOVIN	Proteasome subunit alpha type-1 OS=Bos taurus GN=PSMA1 PE=1 SV=1
	sp|Q3T0W9|RL19_BOVIN	60S ribosomal protein L19 OS=Bos taurus GN=RPL19 PE=2 SV=1
	sp|Q3T0W4|PP1R7_BOVIN	Protein phosphatase 1 regulatory subunit 7 OS=Bos taurus GN=PPP1R7 PE=1 SV=1
	sp|Q3T0V4|RS11_BOVIN	40S ribosomal protein S11 OS=Bos taurus GN=RPS11 PE=2 SV=3
	sp|Q3T0V3|EIF3K_BOVIN	Eukaryotic translation initiation factor 3 subunit K OS=Bos taurus GN=EIF3K PE=2 SV=1
	sp|Q3T0U7|FA96A_BOVIN	MIP18 family protein FAM96A OS=Bos taurus GN=FAM96A PE=2 SV=1
	sp|Q3T0U2|RL14_BOVIN	60S ribosomal protein L14 OS=Bos taurus GN=RPL14 PE=2 SV=3
	sp|Q3T0T1|PSB10_BOVIN	Proteasome subunit beta type-10 OS=Bos taurus GN=PSMB10 PE=1 SV=1
	sp|Q3T0S6|RL8_BOVIN	60S ribosomal protein L8 OS=Bos taurus GN=RPL8 PE=2 SV=3
	sp|Q3T0R1|RS18_BOVIN	40S ribosomal protein S18 OS=Bos taurus GN=RPS18 PE=2 SV=3
	sp|Q3T0Q6|CNBP_BOVIN	Cellular nucleic acid-binding protein OS=Bos taurus GN=CNBP PE=2 SV=1
	sp|Q3T0Q4|NDKB_BOVIN	Nucleoside diphosphate kinase B OS=Bos taurus GN=NME2 PE=1 SV=1
	sp|Q3T0P6|PGK1_BOVIN	Phosphoglycerate kinase 1 OS=Bos taurus GN=PGK1 PE=2 SV=3
	sp|Q3T0P5|CASP6_BOVIN	Caspase-6 OS=Bos taurus GN=CASP6 PE=2 SV=1
	sp|Q3T0M7|RANG_BOVIN	Ran-specific GTPase-activating protein OS=Bos taurus GN=RANBP1 PE=2 SV=1
	sp|Q3T0M0|VPS29_BOVIN	Vacuolar protein sorting-associated protein 29 OS=Bos taurus GN=VPS29 PE=2 SV=1
	sp|Q3T0L7|RL28_BOVIN	60S ribosomal protein L28 OS=Bos taurus GN=RPL28 PE=2 SV=3
	sp|Q3T0L2|ERP44_BOVIN	Endoplasmic reticulum resident protein 44 OS=Bos taurus GN=ERP44 PE=2 SV=1
	sp|Q3T0K2|TCPG_BOVIN	T-complex protein 1 subunit gamma OS=Bos taurus GN=CCT3 PE=1 SV=1
	sp|Q3T0I5|FIS1_BOVIN	Mitochondrial fission 1 protein OS=Bos taurus GN=FIS1 PE=2 SV=1
	sp|Q3T0G5|PROSC_BOVIN	Proline synthase co-transcribed bacterial homolog protein OS=Bos taurus GN=PROSC PE=2 SV=1
	sp|Q3T0F7|MTPN_BOVIN	Myotrophin OS=Bos taurus GN=MTPN PE=1 SV=3
	sp|Q3T0F4|RS10_BOVIN	40S ribosomal protein S10 OS=Bos taurus GN=RPS10 PE=2 SV=1
	sp|Q3T0E7|PP1A_BOVIN	Serine/threonine-protein phosphatase PP1-alpha catalytic subunit OS=Bos taurus GN=PPP1CA PE=2 SV=1
	sp|Q3T0E0|ATOX1_BOVIN	Copper transport protein ATOX1 OS=Bos taurus GN=ATOX1 PE=3 SV=1
	sp|Q3T0D5|RL30_BOVIN	60S ribosomal protein L30 OS=Bos taurus GN=RPL30 PE=3 SV=3
	sp|Q3T0D0|HNRPK_BOVIN	Heterogeneous nuclear ribonucleoprotein K OS=Bos taurus GN=HNRNPK PE=2 SV=1
	sp|Q3T0C7|STMN1_BOVIN	Stathmin OS=Bos taurus GN=STMN1 PE=2 SV=3
	sp|Q3T0B2|PSMD6_BOVIN	26S proteasome non-ATPase regulatory subunit 6 OS=Bos taurus GN=PSMD6 PE=2 SV=1
	sp|Q3T0A3|CFAD_BOVIN	Complement factor D OS=Bos taurus GN=CFD PE=2 SV=1
	sp|Q3T087|RL11_BOVIN	60S ribosomal protein L11 OS=Bos taurus GN=RPL11 PE=2 SV=3
	sp|Q3T057|RL23_BOVIN	60S ribosomal protein L23 OS=Bos taurus GN=RPL23 PE=2 SV=2
	sp|Q3T054|RAN_BOVIN	GTP-binding nuclear protein Ran OS=Bos taurus GN=RAN PE=2 SV=3
	sp|Q3T052|ITIH4_BOVIN	Inter-alpha-trypsin inhibitor heavy chain H4 OS=Bos taurus GN=ITIH4 PE=1 SV=1
	sp|Q3T051|RL39_BOVIN	60S ribosomal protein L39 OS=Bos taurus GN=RPL39 PE=3 SV=3
	sp|Q3T046|BDH2_BOVIN	3-hydroxybutyrate dehydrogenase type 2 OS=Bos taurus GN=BDH2 PE=2 SV=1
	sp|Q3T035|ARPC3_BOVIN	Actin-related protein 2/3 complex subunit 3 OS=Bos taurus GN=ARPC3 PE=1 SV=3
	sp|Q3T030|PRS6B_BOVIN	26S protease regulatory subunit 6B OS=Bos taurus GN=PSMC4 PE=2 SV=1
	sp|Q3T025|RL17_BOVIN	60S ribosomal protein L17 OS=Bos taurus GN=RPL17 PE=2 SV=3
	sp|Q3T024|ROP1L_BOVIN	Ropporin-1-like protein OS=Bos taurus GN=ROPN1L PE=2 SV=1
	sp|Q3T005|PDLI4_BOVIN	PDZ and LIM domain protein 4 OS=Bos taurus GN=PDLIM4 PE=2 SV=1
	sp|Q3T003|RL18A_BOVIN	60S ribosomal protein L18a OS=Bos taurus GN=RPL18A PE=2 SV=1
	sp|Q3SZX2|IPP2_BOVIN	Protein phosphatase inhibitor 2 OS=Bos taurus GN=PPP1R2 PE=2 SV=1
	sp|Q3SZV7|HEMO_BOVIN	Hemopexin OS=Bos taurus GN=HPX PE=2 SV=1
	sp|Q3SZV3|EF1G_BOVIN	Elongation factor 1-gamma OS=Bos taurus GN=EEF1G PE=2 SV=1
	sp|Q3SZR3|A1AG_BOVIN	Alpha-1-acid glycoprotein OS=Bos taurus GN=ORM1 PE=2 SV=1
	sp|Q3SZQ6|RL32_BOVIN	60S ribosomal protein L32 OS=Bos taurus GN=RPL32 PE=2 SV=3
	sp|Q3SZN2|SC23B_BOVIN	Protein transport protein Sec23B OS=Bos taurus GN=SEC23B PE=2 SV=1
	sp|Q3SZK8|NHRF1_BOVIN	Na(+)/H(+) exchange regulatory cofactor NHE-RF1 OS=Bos taurus GN=SLC9A3R1 PE=2 SV=1
	sp|Q3SZJ9|PMM2_BOVIN	Phosphomannomutase 2 OS=Bos taurus GN=PMM2 PE=2 SV=1
	sp|Q3SZJ4|PTGR1_BOVIN	Prostaglandin reductase 1 OS=Bos taurus GN=PTGR1 PE=2 SV=1
	sp|Q3SZJ0|ARLY_BOVIN	Argininosuccinate lyase OS=Bos taurus GN=ASL PE=2 SV=1
	sp|Q3SZI4|1433T_BOVIN	14-3-3 protein theta OS=Bos taurus GN=YWHAQ PE=2 SV=1
	sp|Q3SZI0|MPI_BOVIN	Mannose-6-phosphate isomerase OS=Bos taurus GN=MPI PE=2 SV=3
	sp|Q3SZH7|LKHA4_BOVIN	Leukotriene A-4 hydrolase OS=Bos taurus GN=LTA4H PE=2 SV=3
	sp|Q3SZF2|ARF4_BOVIN	ADP-ribosylation factor 4 OS=Bos taurus GN=ARF4 PE=2 SV=3
	sp|Q3SZE2|PFD1_BOVIN	Prefoldin subunit 1 OS=Bos taurus GN=PFDN1 PE=2 SV=1
	sp|Q3SZC6|AN32B_BOVIN	Acidic leucine-rich nuclear phosphoprotein 32 family member B OS=Bos taurus GN=ANP32B PE=2 SV=1
	sp|Q3SZC4|NSF1C_BOVIN	NSFL1 cofactor p47 OS=Bos taurus GN=NSFL1C PE=2 SV=1
	sp|Q3SZC2|PSB9_BOVIN	Proteasome subunit beta type-9 OS=Bos taurus GN=PSMB9 PE=1 SV=1
	sp|Q3SZB7|F16P1_BOVIN	Fructose-1,6-bisphosphatase 1 OS=Bos taurus GN=FBP1 PE=2 SV=3
	sp|Q3SZA5|SPSY_BOVIN	Spermine synthase OS=Bos taurus GN=SMS PE=2 SV=1
	sp|Q3SZA0|CSN4_BOVIN	COP9 signalosome complex subunit 4 OS=Bos taurus GN=COPS4 PE=2 SV=1
	sp|Q3SZ90|RL13A_BOVIN	60S ribosomal protein L13a OS=Bos taurus GN=RPL13A PE=2 SV=3
	sp|Q3SZ65|IF4A2_BOVIN	Eukaryotic initiation factor 4A-II OS=Bos taurus GN=EIF4A2 PE=2 SV=1
	sp|Q3SZ62|PGAM1_BOVIN	Phosphoglycerate mutase 1 OS=Bos taurus GN=PGAM1 PE=2 SV=3
	sp|Q3SZ59|RL36A_BOVIN	60S ribosomal protein L36a OS=Bos taurus GN=RPL36A PE=3 SV=3
	sp|Q3SZ54|IF4A1_BOVIN	Eukaryotic initiation factor 4A-I OS=Bos taurus GN=EIF4A1 PE=2 SV=1
	sp|Q3SZ43|UB2V2_BOVIN	Ubiquitin-conjugating enzyme E2 variant 2 OS=Bos taurus GN=UBE2V2 PE=2 SV=3
	sp|Q3SZ19|PSMD9_BOVIN	26S proteasome non-ATPase regulatory subunit 9 OS=Bos taurus GN=PSMD9 PE=1 SV=1
	sp|Q3SZ18|HPRT_BOVIN	Hypoxanthine-guanine phosphoribosyltransferase OS=Bos taurus GN=HPRT1 PE=2 SV=3
	sp|Q3SZ16|IAH1_BOVIN	Isoamyl acetate-hydrolyzing esterase 1 homolog OS=Bos taurus GN=IAH1 PE=2 SV=1
	sp|Q3SYX9|ARPC5_BOVIN	Actin-related protein 2/3 complex subunit 5 OS=Bos taurus GN=ARPC5 PE=1 SV=3
	sp|Q3SYW6|EIF3C_BOVIN	Eukaryotic translation initiation factor 3 subunit C OS=Bos taurus GN=EIF3C PE=2 SV=1
	sp|Q3SYV4|CAP1_BOVIN	Adenylyl cyclase-associated protein 1 OS=Bos taurus GN=CAP1 PE=2 SV=3
	sp|Q3SYU9|MVP_BOVIN	Major vault protein OS=Bos taurus GN=MVP PE=2 SV=1
	sp|Q3SYU7|TNPO1_BOVIN	Transportin-1 OS=Bos taurus GN=TNPO1 PE=1 SV=2
	sp|Q3SYU2|EF2_BOVIN	Elongation factor 2 OS=Bos taurus GN=EEF2 PE=2 SV=3
	sp|Q3SYS9|KBP_BOVIN	KIF1-binding protein OS=Bos taurus GN=KBP PE=2 SV=1
	sp|Q3SYR7|RL9_BOVIN	60S ribosomal protein L9 OS=Bos taurus GN=RPL9 PE=2 SV=1
	sp|Q3SX44|DDAH2_BOVIN	N(G),N(G)-dimethylarginine dimethylaminohydrolase 2 OS=Bos taurus GN=DDAH2 PE=2 SV=1
	sp|Q3SWY3|IMDH2_BOVIN	Inosine-5'-monophosphate dehydrogenase 2 OS=Bos taurus GN=IMPDH2 PE=2 SV=1
	sp|Q3SWX8|RBBP7_BOVIN	Histone-binding protein RBBP7 OS=Bos taurus GN=RBBP7 PE=2 SV=1
	sp|Q3SWW9|PP1B_BOVIN	Serine/threonine-protein phosphatase PP1-beta catalytic subunit OS=Bos taurus GN=PPP1CB PE=2 SV=1
	sp|Q3MIC0|RL37A_BOVIN	60S ribosomal protein L37a OS=Bos taurus GN=RPL37A PE=3 SV=3
	sp|Q3MHY1|CSRP1_BOVIN	Cysteine and glycine-rich protein 1 OS=Bos taurus GN=CSRP1 PE=2 SV=3
	sp|Q3MHR7|ARPC2_BOVIN	Actin-related protein 2/3 complex subunit 2 OS=Bos taurus GN=ARPC2 PE=1 SV=1
	sp|Q3MHR0|LYPA1_BOVIN	Acyl-protein thioesterase 1 OS=Bos taurus GN=LYPLA1 PE=2 SV=1
	sp|Q3MHP3|S10AE_BOVIN	Protein S100-A14 OS=Bos taurus GN=S100A14 PE=3 SV=1
	sp|Q3MHP2|RB11B_BOVIN	Ras-related protein Rab-11B OS=Bos taurus GN=RAB11B PE=2 SV=3
	sp|Q3MHP1|UB2L3_BOVIN	Ubiquitin-conjugating enzyme E2 L3 OS=Bos taurus GN=UBE2L3 PE=2 SV=1
	sp|Q3MHN2|CO9_BOVIN	Complement component C9 OS=Bos taurus GN=C9 PE=2 SV=1
	sp|Q3MHN0|PSB6_BOVIN	Proteasome subunit beta type-6 OS=Bos taurus GN=PSMB6 PE=1 SV=1
	sp|Q3MHM7|RL35_BOVIN	60S ribosomal protein L35 OS=Bos taurus GN=RPL35 PE=2 SV=3
	sp|Q3MHM5|TBB4B_BOVIN	Tubulin beta-4B chain OS=Bos taurus GN=TUBB4B PE=2 SV=1
	sp|Q3MHL7|TCPZ_BOVIN	T-complex protein 1 subunit zeta OS=Bos taurus GN=CCT6A PE=1 SV=3
	sp|Q3MHL4|SAHH_BOVIN	Adenosylhomocysteinase OS=Bos taurus GN=AHCY PE=2 SV=3
	sp|Q3MHH4|SYQ_BOVIN	Glutamine--tRNA ligase OS=Bos taurus GN=QARS PE=2 SV=1
	sp|Q3MHF8|LS14A_BOVIN	Protein LSM14 homolog A OS=Bos taurus GN=LSM14A PE=2 SV=1
	sp|Q3MHF7|MTAP_BOVIN	S-methyl-5'-thioadenosine phosphorylase OS=Bos taurus GN=MTAP PE=1 SV=1
	sp|Q3B7N2|ACTN1_BOVIN	Alpha-actinin-1 OS=Bos taurus GN=ACTN1 PE=2 SV=1
	sp|Q3B7M9|PYGB_BOVIN	Glycogen phosphorylase, brain form OS=Bos taurus GN=PYGB PE=2 SV=3
	sp|Q3B7M5|LASP1_BOVIN	LIM and SH3 domain protein 1 OS=Bos taurus GN=LASP1 PE=2 SV=1
	sp|Q3B7M2|GLO2_BOVIN	Hydroxyacylglutathione hydrolase, mitochondrial OS=Bos taurus GN=HAGH PE=2 SV=3
	sp|Q32PI5|2AAA_BOVIN	Serine/threonine-protein phosphatase 2A 65 kDa regulatory subunit A alpha isoform OS=Bos taurus GN=PPP2R1A PE=1 SV=1
	sp|Q32PH8|EF1A2_BOVIN	Elongation factor 1-alpha 2 OS=Bos taurus GN=EEF1A2 PE=2 SV=1
	sp|Q32PF2|ACLY_BOVIN	ATP-citrate synthase OS=Bos taurus GN=ACLY PE=2 SV=1
	sp|Q32PE9|LSM3_BOVIN	U6 snRNA-associated Sm-like protein LSm3 OS=Bos taurus GN=LSM3 PE=3 SV=3
	sp|Q32PD5|RS19_BOVIN	40S ribosomal protein S19 OS=Bos taurus GN=RPS19 PE=2 SV=3
	sp|Q32PC9|AR2BP_BOVIN	ADP-ribosylation factor-like protein 2-binding protein OS=Bos taurus GN=ARL2BP PE=1 SV=2
	sp|Q32PB9|RL38_BOVIN	60S ribosomal protein L38 OS=Bos taurus GN=RPL38 PE=3 SV=4
	sp|Q32PB8|RS21_BOVIN	40S ribosomal protein S21 OS=Bos taurus GN=RPS21 PE=3 SV=1
	sp|Q32PA9|FKBP2_BOVIN	Peptidyl-prolyl cis-trans isomerase FKBP2 OS=Bos taurus GN=FKBP2 PE=2 SV=1
	sp|Q32PA8|AAMDC_BOVIN	Mth938 domain-containing protein OS=Bos taurus GN=AAMDC PE=2 SV=1
	sp|Q32PA4|PHP14_BOVIN	14 kDa phosphohistidine phosphatase OS=Bos taurus GN=PHPT1 PE=2 SV=1
	sp|Q32P85|DLRB2_BOVIN	Dynein light chain roadblock-type 2 OS=Bos taurus GN=DYNLRB2 PE=3 SV=1
	sp|Q32LP2|RADI_BOVIN	Radixin OS=Bos taurus GN=RDX PE=2 SV=1
	sp|Q32LM2|SGTA_BOVIN	Small glutamine-rich tetratricopeptide repeat-containing protein alpha OS=Bos taurus GN=SGTA PE=2 SV=1
	sp|Q32LK1|AASD1_BOVIN	Alanyl-tRNA editing protein Aarsd1 OS=Bos taurus GN=AARSD1 PE=2 SV=1
	sp|Q32LH4|NIT1_BOVIN	Nitrilase homolog 1 OS=Bos taurus GN=NIT1 PE=2 SV=1
	sp|Q32LG3|MDHM_BOVIN	Malate dehydrogenase, mitochondrial OS=Bos taurus GN=MDH2 PE=1 SV=1
	sp|Q32LE5|ASGL1_BOVIN	Isoaspartyl peptidase/L-asparaginase OS=Bos taurus GN=ASRGL1 PE=2 SV=1
	sp|Q32L99|PTGR2_BOVIN	Prostaglandin reductase 2 OS=Bos taurus GN=PTGR2 PE=2 SV=1
	sp|Q32L93|GMPR2_BOVIN	GMP reductase 2 OS=Bos taurus GN=GMPR2 PE=2 SV=1
	sp|Q32L41|GFRP_BOVIN	GTP cyclohydrolase 1 feedback regulatory protein OS=Bos taurus GN=GCHFR PE=3 SV=1
	sp|Q32L09|CS066_BOVIN	UPF0515 protein C19orf66 homolog OS=Bos taurus PE=2 SV=1
	sp|Q32KY3|MLF1_BOVIN	Myeloid leukemia factor 1 OS=Bos taurus GN=MLF1 PE=2 SV=1
	sp|Q32KY0|APOD_BOVIN	Apolipoprotein D OS=Bos taurus GN=APOD PE=2 SV=1
	sp|Q32KX8|CP013_BOVIN	UPF0585 protein C16orf13 homolog OS=Bos taurus PE=2 SV=1
	sp|Q32KW2|UBXN1_BOVIN	UBX domain-containing protein 1 OS=Bos taurus GN=UBXN1 PE=2 SV=1
	sp|Q32KV0|PGAM2_BOVIN	Phosphoglycerate mutase 2 OS=Bos taurus GN=PGAM2 PE=2 SV=1
	sp|Q32KS0|TBCE_BOVIN	Tubulin-specific chaperone E OS=Bos taurus GN=TBCE PE=2 SV=1
	sp|Q32KP9|NTF2_BOVIN	Nuclear transport factor 2 OS=Bos taurus GN=NUTF2 PE=2 SV=1
	sp|Q32KL2|PSB5_BOVIN	Proteasome subunit beta type-5 OS=Bos taurus GN=PSMB5 PE=1 SV=1
	sp|Q2YDM1|ARL1_BOVIN	ADP-ribosylation factor-like protein 1 OS=Bos taurus GN=ARL1 PE=2 SV=1
	sp|Q2YDG0|GPC5C_BOVIN	G-protein coupled receptor family C group 5 member C OS=Bos taurus GN=GPRC5C PE=2 SV=2
	sp|Q2YDE9|TES_BOVIN	Testin OS=Bos taurus GN=TES PE=2 SV=1
	sp|Q2YDE4|PSA6_BOVIN	Proteasome subunit alpha type-6 OS=Bos taurus GN=PSMA6 PE=1 SV=1
	sp|Q2YDD1|FR1OP_BOVIN	FGFR1 oncogene partner OS=Bos taurus GN=FGFR1OP PE=2 SV=1
	sp|Q2UVX4|CO3_BOVIN	Complement C3 OS=Bos taurus GN=C3 PE=1 SV=2
	sp|Q2TBX2|PFD3_BOVIN	Prefoldin subunit 3 OS=Bos taurus GN=VBP1 PE=2 SV=1
	sp|Q2TBW7|SNX2_BOVIN	Sorting nexin-2 OS=Bos taurus GN=SNX2 PE=2 SV=1
	sp|Q2TBW6|ARL3_BOVIN	ADP-ribosylation factor-like protein 3 OS=Bos taurus GN=ARL3 PE=2 SV=1
	sp|Q2TBW0|ATX10_BOVIN	Ataxin-10 OS=Bos taurus GN=ATXN10 PE=2 SV=1
	sp|Q2TBU0|HPT_BOVIN	Haptoglobin OS=Bos taurus GN=HP PE=2 SV=1
	sp|Q2TBR8|CALR3_BOVIN	Calreticulin-3 OS=Bos taurus GN=CALR3 PE=2 SV=1
	sp|Q2TBQ8|6PGL_BOVIN	6-phosphogluconolactonase OS=Bos taurus GN=PGLS PE=2 SV=1
	sp|Q2TBQ5|RL7A_BOVIN	60S ribosomal protein L7a OS=Bos taurus GN=RPL7A PE=2 SV=3
	sp|Q2TBQ3|GAMT_BOVIN	Guanidinoacetate N-methyltransferase OS=Bos taurus GN=GAMT PE=2 SV=1
	sp|Q2TBN9|IFT43_BOVIN	Intraflagellar transport protein 43 homolog OS=Bos taurus GN=IFT43 PE=2 SV=1
	sp|Q2TBN5|COMD9_BOVIN	COMM domain-containing protein 9 OS=Bos taurus GN=COMMD9 PE=2 SV=1
	sp|Q2TBN3|CETN2_BOVIN	Centrin-2 OS=Bos taurus GN=CETN2 PE=2 SV=1
	sp|Q2TBG8|UCHL3_BOVIN	Ubiquitin carboxyl-terminal hydrolase isozyme L3 OS=Bos taurus GN=UCHL3 PE=2 SV=1
	sp|Q2TA49|VASP_BOVIN	Vasodilator-stimulated phosphoprotein OS=Bos taurus GN=VASP PE=2 SV=3
	sp|Q2TA37|ARL2_BOVIN	ADP-ribosylation factor-like protein 2 OS=Bos taurus GN=ARL2 PE=1 SV=1
	sp|Q2T9Y6|GSH0_BOVIN	Glutamate--cysteine ligase regulatory subunit OS=Bos taurus GN=GCLM PE=2 SV=1
	sp|Q2T9W2|THUM3_BOVIN	THUMP domain-containing protein 3 OS=Bos taurus GN=THUMPD3 PE=2 SV=1
	sp|Q2T9V8|DTD1_BOVIN	D-tyrosyl-tRNA(Tyr) deacylase 1 OS=Bos taurus GN=DTD1 PE=2 SV=1
	sp|Q2T9T9|FBXW9_BOVIN	F-box/WD repeat-containing protein 9 OS=Bos taurus GN=FBXW9 PE=2 SV=1
	sp|Q2T9S4|PGP_BOVIN	Phosphoglycolate phosphatase OS=Bos taurus GN=PGP PE=2 SV=1
	sp|Q2T9S0|TBB3_BOVIN	Tubulin beta-3 chain OS=Bos taurus GN=TUBB3 PE=2 SV=1
	sp|Q2T9L8|SYMC_BOVIN	Methionine--tRNA ligase, cytoplasmic OS=Bos taurus GN=MARS PE=2 SV=1
	sp|Q2NL31|MTNA_BOVIN	Methylthioribose-1-phosphate isomerase OS=Bos taurus GN=MRI1 PE=2 SV=1
	sp|Q2NL29|INO1_BOVIN	Inositol-3-phosphate synthase 1 OS=Bos taurus GN=ISYNA1 PE=2 SV=1
	sp|Q2NL24|PSMG2_BOVIN	Proteasome assembly chaperone 2 OS=Bos taurus GN=PSMG2 PE=2 SV=1
	sp|Q2NKZ1|TCPH_BOVIN	T-complex protein 1 subunit eta OS=Bos taurus GN=CCT7 PE=1 SV=1
	sp|Q2NKY7|SEPT2_BOVIN	Septin-2 OS=Bos taurus GN=SEPT2 PE=2 SV=1
	sp|Q2LGB5|TOLIP_BOVIN	Toll-interacting protein OS=Bos taurus GN=TOLLIP PE=2 SV=1
	sp|Q2KJJ9|F16P2_BOVIN	Fructose-1,6-bisphosphatase isozyme 2 OS=Bos taurus GN=FBP2 PE=2 SV=1
	sp|Q2KJI2|STT3A_BOVIN	Dolichyl-diphosphooligosaccharide--protein glycosyltransferase subunit STT3A OS=Bos taurus GN=STT3A PE=2 SV=1
	sp|Q2KJH9|AL9A1_BOVIN	4-trimethylaminobutyraldehyde dehydrogenase OS=Bos taurus GN=ALDH9A1 PE=2 SV=1
	sp|Q2KJH6|SERPH_BOVIN	Serpin H1 OS=Bos taurus GN=SERPINH1 PE=2 SV=1
	sp|Q2KJH4|WDR1_BOVIN	WD repeat-containing protein 1 OS=Bos taurus GN=WDR1 PE=2 SV=3
	sp|Q2KJG3|SYNC_BOVIN	Asparagine--tRNA ligase, cytoplasmic OS=Bos taurus GN=NARS PE=2 SV=3
	sp|Q2KJG2|UFM1_BOVIN	Ubiquitin-fold modifier 1 OS=Bos taurus GN=UFM1 PE=3 SV=1
	sp|Q2KJF1|A1BG_BOVIN	Alpha-1B-glycoprotein OS=Bos taurus GN=A1BG PE=1 SV=1
	sp|Q2KJD0|TBB5_BOVIN	Tubulin beta-5 chain OS=Bos taurus GN=TUBB5 PE=2 SV=1
	sp|Q2KJ93|CDC42_BOVIN	Cell division control protein 42 homolog OS=Bos taurus GN=CDC42 PE=1 SV=1
	sp|Q2KJ46|PSMD3_BOVIN	26S proteasome non-ATPase regulatory subunit 3 OS=Bos taurus GN=PSMD3 PE=2 SV=1
	sp|Q2KJ44|PTPA_BOVIN	Serine/threonine-protein phosphatase 2A activator OS=Bos taurus GN=PPP2R4 PE=2 SV=1
	sp|Q2KJ32|SBP1_BOVIN	Selenium-binding protein 1 OS=Bos taurus GN=SELENBP1 PE=1 SV=1
	sp|Q2KJ25|PSD12_BOVIN	26S proteasome non-ATPase regulatory subunit 12 OS=Bos taurus GN=PSMD12 PE=2 SV=3
	sp|Q2KJ22|FA63A_BOVIN	Protein FAM63A OS=Bos taurus GN=FAM63A PE=2 SV=1
	sp|Q2KIY7|BT3L4_BOVIN	Transcription factor BTF3 homolog 4 OS=Bos taurus GN=BTF3L4 PE=2 SV=1
	sp|Q2KIX7|HP251_BOVIN	Protein HP-25 homolog 1 OS=Bos taurus PE=1 SV=1
	sp|Q2KIW9|KCY_BOVIN	UMP-CMP kinase OS=Bos taurus GN=CMPK1 PE=2 SV=2
	sp|Q2KIU7|RSPH9_BOVIN	Radial spoke head protein 9 homolog OS=Bos taurus GN=RSPH9 PE=2 SV=1
	sp|Q2KIU3|HP252_BOVIN	Protein HP-25 homolog 2 OS=Bos taurus PE=2 SV=1
	sp|Q2KIT0|HP20_BOVIN	Protein HP-20 homolog OS=Bos taurus PE=2 SV=1
	sp|Q2KIS7|TETN_BOVIN	Tetranectin OS=Bos taurus GN=CLEC3B PE=2 SV=1
	sp|Q2KIK0|SUGT1_BOVIN	Suppressor of G2 allele of SKP1 homolog OS=Bos taurus GN=SUGT1 PE=2 SV=1
	sp|Q2KII4|ELOC_BOVIN	Transcription elongation factor B polypeptide 1 OS=Bos taurus GN=TCEB1 PE=3 SV=1
	sp|Q2KID4|DNAL1_BOVIN	Dynein light chain 1, axonemal OS=Bos taurus GN=DNAL1 PE=2 SV=1
	sp|Q2KIB0|FAHD2_BOVIN	Fumarylacetoacetate hydrolase domain-containing protein 2 OS=Bos taurus GN=FAHD2 PE=2 SV=1
	sp|Q2KIA5|DNM1L_BOVIN	Dynamin-1-like protein OS=Bos taurus GN=DNM1L PE=2 SV=1
	sp|Q2KIA2|TR112_BOVIN	tRNA methyltransferase 112 homolog OS=Bos taurus GN=TRMT112 PE=2 SV=1
	sp|Q2KI84|SYHC_BOVIN	Histidine--tRNA ligase, cytoplasmic OS=Bos taurus GN=HARS PE=2 SV=1
	sp|Q2KI42|PSD11_BOVIN	26S proteasome non-ATPase regulatory subunit 11 OS=Bos taurus GN=PSMD11 PE=2 SV=3
	sp|Q2KHU8|IF2G_BOVIN	Eukaryotic translation initiation factor 2 subunit 3 OS=Bos taurus GN=EIF2S3 PE=2 SV=1
	sp|Q2HJJ0|KLC4_BOVIN	Kinesin light chain 4 OS=Bos taurus GN=KLC4 PE=2 SV=2
	sp|Q2HJH3|CK054_BOVIN	Ester hydrolase C11orf54 homolog OS=Bos taurus PE=2 SV=1
	sp|Q2HJH2|RAB1B_BOVIN	Ras-related protein Rab-1B OS=Bos taurus GN=RAB1B PE=2 SV=1
	sp|Q2HJH1|DNPEP_BOVIN	Aspartyl aminopeptidase OS=Bos taurus GN=DNPEP PE=1 SV=1
	sp|Q2HJG5|VPS35_BOVIN	Vacuolar protein sorting-associated protein 35 OS=Bos taurus GN=VPS35 PE=2 SV=1
	sp|Q2HJF7|KCC2D_BOVIN	Calcium/calmodulin-dependent protein kinase type II subunit delta OS=Bos taurus GN=CAMK2D PE=2 SV=1
	sp|Q2HJB0|MBLC1_BOVIN	Metallo-beta-lactamase domain-containing protein 1 OS=Bos taurus GN=MBLAC1 PE=2 SV=1
	sp|Q2HJ94|DNJA2_BOVIN	DnaJ homolog subfamily A member 2 OS=Bos taurus GN=DNAJA2 PE=2 SV=1
	sp|Q2HJ86|TBA1D_BOVIN	Tubulin alpha-1D chain OS=Bos taurus GN=TUBA1D PE=1 SV=1
	sp|Q2HJ81|TBB6_BOVIN	Tubulin beta-6 chain OS=Bos taurus GN=TUBB6 PE=2 SV=1
	sp|Q2HJ60|ROA2_BOVIN	Heterogeneous nuclear ribonucleoproteins A2/B1 OS=Bos taurus GN=HNRNPA2B1 PE=2 SV=1
	sp|Q2HJ58|PRPS1_BOVIN	Ribose-phosphate pyrophosphokinase 1 OS=Bos taurus GN=PRPS1 PE=2 SV=3
	sp|Q2HJ57|COTL1_BOVIN	Coactosin-like protein OS=Bos taurus GN=COTL1 PE=2 SV=3
	sp|Q2HJ54|PIPNA_BOVIN	Phosphatidylinositol transfer protein alpha isoform OS=Bos taurus GN=PITPNA PE=1 SV=3
	sp|Q2HJ49|MOES_BOVIN	Moesin OS=Bos taurus GN=MSN PE=2 SV=3
	sp|Q2HJ47|DENR_BOVIN	Density-regulated protein OS=Bos taurus GN=DENR PE=2 SV=1
	sp|Q2HJ33|OLA1_BOVIN	Obg-like ATPase 1 OS=Bos taurus GN=OLA1 PE=2 SV=1
	sp|Q29S21|K2C7_BOVIN	Keratin, type II cytoskeletal 7 OS=Bos taurus GN=KRT7 PE=2 SV=1
	sp|Q29S11|NUCKS_BOVIN	Nuclear ubiquitous casein and cyclin-dependent kinase substrate 1 OS=Bos taurus GN=NUCKS1 PE=2 SV=1
	sp|Q29S00|OSCP1_BOVIN	Protein OSCP1 OS=Bos taurus GN=OSCP1 PE=2 SV=1
	sp|Q29RU4|CO6_BOVIN	Complement component C6 OS=Bos taurus GN=C6 PE=2 SV=1
	sp|Q29RQ1|CO7_BOVIN	Complement component C7 OS=Bos taurus GN=C7 PE=2 SV=1
	sp|Q29RL2|CHRD1_BOVIN	Cysteine and histidine-rich domain-containing protein 1 OS=Bos taurus GN=CHORDC1 PE=2 SV=1
	sp|Q29RK4|RD23B_BOVIN	UV excision repair protein RAD23 homolog B OS=Bos taurus GN=RAD23B PE=2 SV=1
	sp|Q29RI9|MAT2B_BOVIN	Methionine adenosyltransferase 2 subunit beta OS=Bos taurus GN=MAT2B PE=2 SV=1
	sp|Q29RI6|CAB39_BOVIN	Calcium-binding protein 39 OS=Bos taurus GN=CAB39 PE=2 SV=1
	sp|Q29465|SYYC_BOVIN	Tyrosine--tRNA ligase, cytoplasmic OS=Bos taurus GN=YARS PE=2 SV=4
	sp|Q29460|PA1B3_BOVIN	Platelet-activating factor acetylhydrolase IB subunit gamma OS=Bos taurus GN=PAFAH1B3 PE=1 SV=1
	sp|Q29437|AOCX_BOVIN	Primary amine oxidase, liver isozyme OS=Bos taurus PE=1 SV=1
	sp|Q28205|TBCD_BOVIN	Tubulin-specific chaperone D OS=Bos taurus GN=TBCD PE=1 SV=1
	sp|Q28198|TPA_BOVIN	Tissue-type plasminogen activator OS=Bos taurus GN=PLAT PE=2 SV=1
	sp|Q28107|FA5_BOVIN	Coagulation factor V OS=Bos taurus GN=F5 PE=1 SV=1
	sp|Q28106|CNTN1_BOVIN	Contactin-1 OS=Bos taurus GN=CNTN1 PE=2 SV=1
	sp|Q28104|COPE_BOVIN	Coatomer subunit epsilon OS=Bos taurus GN=COPE PE=1 SV=3
	sp|Q28085|CFAH_BOVIN	Complement factor H OS=Bos taurus GN=CFH PE=1 SV=3
	sp|Q28065|C4BPA_BOVIN	C4b-binding protein alpha chain OS=Bos taurus GN=C4BPA PE=2 SV=1
	sp|Q28042|OVGP1_BOVIN	Oviduct-specific glycoprotein (Fragment) OS=Bos taurus GN=OVGP1 PE=1 SV=1
	sp|Q28035|GSTA1_BOVIN	Glutathione S-transferase A1 OS=Bos taurus GN=GSTA1 PE=2 SV=3
	sp|Q28034|GLU2B_BOVIN	Glucosidase 2 subunit beta OS=Bos taurus GN=PRKCSH PE=2 SV=1
	sp|Q28024|GBG12_BOVIN	Guanine nucleotide-binding protein G(I)/G(S)/G(O) subunit gamma-12 OS=Bos taurus GN=GNG12 PE=1 SV=2
	sp|Q28022|MFAP5_BOVIN	Microfibrillar-associated protein 5 OS=Bos taurus GN=MFAP5 PE=1 SV=1
	sp|Q28007|DPYD_BOVIN	Dihydropyrimidine dehydrogenase [NADP(+)] OS=Bos taurus GN=DPYD PE=1 SV=1
	sp|Q27975|HS71A_BOVIN	Heat shock 70 kDa protein 1A OS=Bos taurus GN=HSPA1A PE=1 SV=2
	sp|Q27971|CAN2_BOVIN	Calpain-2 catalytic subunit OS=Bos taurus GN=CAPN2 PE=2 SV=2
	sp|Q27970|CAN1_BOVIN	Calpain-1 catalytic subunit OS=Bos taurus GN=CAPN1 PE=1 SV=3
	sp|Q27968|DNJC3_BOVIN	DnaJ homolog subfamily C member 3 OS=Bos taurus GN=DNAJC3 PE=1 SV=1
	sp|Q27966|MYO1C_BOVIN	Unconventional myosin-Ic OS=Bos taurus GN=MYO1C PE=1 SV=3
	sp|Q27965|HS71B_BOVIN	Heat shock 70 kDa protein 1B OS=Bos taurus GN=HSPA1B PE=2 SV=1
	sp|Q27960|NPT2B_BOVIN	Sodium-dependent phosphate transport protein 2B OS=Bos taurus GN=SLC34A2 PE=1 SV=1
	sp|Q27957|TPPP_BOVIN	Tubulin polymerization-promoting protein OS=Bos taurus GN=TPPP PE=1 SV=1
	sp|Q27954|COPA_BOVIN	Coatomer subunit alpha OS=Bos taurus GN=COPA PE=1 SV=1
	sp|Q24K21|DPCD_BOVIN	Protein DPCD OS=Bos taurus GN=DPCD PE=2 SV=1
	sp|Q24K00|NUBP1_BOVIN	Cytosolic Fe-S cluster assembly factor NUBP1 OS=Bos taurus GN=NUBP1 PE=2 SV=1
	sp|Q24JY1|RL23A_BOVIN	60S ribosomal protein L23a OS=Bos taurus GN=RPL23A PE=2 SV=1
	sp|Q1RMS2|PYRG2_BOVIN	CTP synthase 2 OS=Bos taurus GN=CTPS2 PE=2 SV=1
	sp|Q1RMJ6|RHOC_BOVIN	Rho-related GTP-binding protein RhoC OS=Bos taurus GN=RHOC PE=2 SV=1
	sp|Q1RMH8|SNX3_BOVIN	Sorting nexin-3 OS=Bos taurus GN=SNX3 PE=2 SV=3
	sp|Q1LZE1|KCMF1_BOVIN	E3 ubiquitin-protein ligase KCMF1 OS=Bos taurus GN=KCMF1 PE=2 SV=1
	sp|Q1LZB4|IFT46_BOVIN	Intraflagellar transport protein 46 homolog OS=Bos taurus GN=IFT46 PE=2 SV=1
	sp|Q1LZA3|ASNS_BOVIN	Asparagine synthetase [glutamine-hydrolyzing] OS=Bos taurus GN=ASNS PE=2 SV=3
	sp|Q1LZ74|OARD1_BOVIN	O-acetyl-ADP-ribose deacetylase 1 OS=Bos taurus GN=OARD1 PE=2 SV=1
	sp|Q1JQD4|GIPC2_BOVIN	PDZ domain-containing protein GIPC2 OS=Bos taurus GN=GIPC2 PE=2 SV=1
	sp|Q1JQ97|BBS4_BOVIN	Bardet-Biedl syndrome 4 protein homolog OS=Bos taurus GN=BBS4 PE=2 SV=1
	sp|Q1JPJ8|THOP1_BOVIN	Thimet oligopeptidase OS=Bos taurus GN=THOP1 PE=2 SV=3
	sp|Q1JPJ2|XPP1_BOVIN	Xaa-Pro aminopeptidase 1 OS=Bos taurus GN=XPNPEP1 PE=2 SV=1
	sp|Q1JPH6|IF4H_BOVIN	Eukaryotic translation initiation factor 4H OS=Bos taurus GN=EIF4H PE=2 SV=1
	sp|Q1JPB0|ILEU_BOVIN	Leukocyte elastase inhibitor OS=Bos taurus GN=SERPINB1 PE=2 SV=2
	sp|Q1JPA0|AL3B1_BOVIN	Aldehyde dehydrogenase family 3 member B1 OS=Bos taurus GN=ALDH3B1 PE=2 SV=1
	sp|Q1JP79|ARC1A_BOVIN	Actin-related protein 2/3 complex subunit 1A OS=Bos taurus GN=ARPC1A PE=2 SV=1
	sp|Q1JP75|DCXR_BOVIN	L-xylulose reductase OS=Bos taurus GN=DCXR PE=2 SV=1
	sp|Q17R07|ARFG3_BOVIN	ADP-ribosylation factor GTPase-activating protein 3 OS=Bos taurus GN=ARFGAP3 PE=2 SV=1
	sp|Q17QS0|SCRN3_BOVIN	Secernin-3 OS=Bos taurus GN=SCRN3 PE=2 SV=1
	sp|Q17QL1|GNPI2_BOVIN	Glucosamine-6-phosphate isomerase 2 OS=Bos taurus GN=GNPDA2 PE=2 SV=1
	sp|Q17QK8|SPRE_BOVIN	Sepiapterin reductase OS=Bos taurus GN=SPR PE=2 SV=1
	sp|Q17QK6|FBX2_BOVIN	F-box only protein 2 OS=Bos taurus GN=FBXO2 PE=2 SV=1
	sp|Q17QG2|NUDC_BOVIN	Nuclear migration protein nudC OS=Bos taurus GN=NUDC PE=2 SV=1
	sp|Q148J6|ARPC4_BOVIN	Actin-related protein 2/3 complex subunit 4 OS=Bos taurus GN=ARPC4 PE=1 SV=3
	sp|Q148G4|TATD1_BOVIN	Putative deoxyribonuclease TATDN1 OS=Bos taurus GN=TATDN1 PE=2 SV=1
	sp|Q148F8|HSPB6_BOVIN	Heat shock protein beta-6 OS=Bos taurus GN=HSPB6 PE=2 SV=1
	sp|Q148C9|HEBP1_BOVIN	Heme-binding protein 1 OS=Bos taurus GN=HEBP1 PE=2 SV=1
	sp|Q0VFX8|CRIP2_BOVIN	Cysteine-rich protein 2 OS=Bos taurus GN=CRIP2 PE=2 SV=1
	sp|Q0VD48|VPS4B_BOVIN	Vacuolar protein sorting-associated protein 4B OS=Bos taurus GN=VPS4B PE=2 SV=1
	sp|Q0VD30|CCZ1_BOVIN	Vacuolar fusion protein CCZ1 homolog OS=Bos taurus GN=CCZ1 PE=2 SV=1
	sp|Q0VD27|ENOPH_BOVIN	Enolase-phosphatase E1 OS=Bos taurus GN=ENOPH1 PE=2 SV=1
	sp|Q0VD22|STK33_BOVIN	Serine/threonine-protein kinase 33 OS=Bos taurus GN=STK33 PE=2 SV=1
	sp|Q0VD18|LHPP_BOVIN	Phospholysine phosphohistidine inorganic pyrophosphate phosphatase OS=Bos taurus GN=LHPP PE=1 SV=1
	sp|Q0VCX4|CTNB1_BOVIN	Catenin beta-1 OS=Bos taurus GN=CTNNB1 PE=1 SV=1
	sp|Q0VCX2|GRP78_BOVIN	78 kDa glucose-regulated protein OS=Bos taurus GN=HSPA5 PE=2 SV=1
	sp|Q0VCX1|C1S_BOVIN	Complement C1s subcomponent OS=Bos taurus GN=C1S PE=2 SV=2
	sp|Q0VCU1|ACOC_BOVIN	Cytoplasmic aconitate hydratase OS=Bos taurus GN=ACO1 PE=2 SV=1
	sp|Q0VCP4|SEPT8_BOVIN	Septin-8 OS=Bos taurus GN=SEPT8 PE=2 SV=3
	sp|Q0VCN3|IFT27_BOVIN	Intraflagellar transport protein 27 homolog OS=Bos taurus GN=IFT27 PE=2 SV=1
	sp|Q0VCN1|NMRL1_BOVIN	NmrA-like family domain-containing protein 1 OS=Bos taurus GN=NMRAL1 PE=2 SV=1
	sp|Q0VCM4|PYGL_BOVIN	Glycogen phosphorylase, liver form OS=Bos taurus GN=PYGL PE=2 SV=1
	sp|Q0VCM0|S10AG_BOVIN	Protein S100-A16 OS=Bos taurus GN=S100A16 PE=3 SV=1
	sp|Q0VCK5|AP2A2_BOVIN	AP-2 complex subunit alpha-2 OS=Bos taurus GN=AP2A2 PE=1 SV=1
	sp|Q0VCK0|PUR9_BOVIN	Bifunctional purine biosynthesis protein PURH OS=Bos taurus GN=ATIC PE=2 SV=1
	sp|Q0VCI6|PIHD1_BOVIN	PIH1 domain-containing protein 1 OS=Bos taurus GN=PIH1D1 PE=2 SV=1
	sp|Q0VCC0|CAYP1_BOVIN	Calcyphosin OS=Bos taurus GN=CAPS PE=2 SV=1
	sp|Q0VC68|SEPT5_BOVIN	Septin-5 OS=Bos taurus GN=SEPT5 PE=2 SV=1
	sp|Q0VC65|ETV6_BOVIN	Transcription factor ETV6 OS=Bos taurus GN=ETV6 PE=2 SV=1
	sp|Q0VBZ9|MRP_BOVIN	MARCKS-related protein OS=Bos taurus GN=MARCKSL1 PE=2 SV=1
	sp|Q0V8S0|HGS_BOVIN	Hepatocyte growth factor-regulated tyrosine kinase substrate OS=Bos taurus GN=HGS PE=2 SV=1
	sp|Q0V8J4|VWA7_BOVIN	von Willebrand factor A domain-containing protein 7 OS=Bos taurus GN=VWA7 PE=2 SV=1
	sp|Q0P5K3|UBE2N_BOVIN	Ubiquitin-conjugating enzyme E2 N OS=Bos taurus GN=UBE2N PE=2 SV=1
	sp|Q0P5F7|PI42C_BOVIN	Phosphatidylinositol 5-phosphate 4-kinase type-2 gamma OS=Bos taurus GN=PIP4K2C PE=2 SV=1
	sp|Q0P5F2|PSMG1_BOVIN	Proteasome assembly chaperone 1 OS=Bos taurus GN=PSMG1 PE=2 SV=1
	sp|Q0P5A6|PSMD5_BOVIN	26S proteasome non-ATPase regulatory subunit 5 OS=Bos taurus GN=PSMD5 PE=2 SV=1
	sp|Q0P569|NUCB1_BOVIN	Nucleobindin-1 OS=Bos taurus GN=NUCB1 PE=2 SV=1
	sp|Q0P565|HDDC2_BOVIN	HD domain-containing protein 2 OS=Bos taurus GN=HDDC2 PE=2 SV=1
	sp|Q0P564|CRBN_BOVIN	Protein cereblon OS=Bos taurus GN=CRBN PE=2 SV=1
	sp|Q0IIM3|HS105_BOVIN	Heat shock protein 105 kDa OS=Bos taurus GN=HSPH1 PE=2 SV=1
	sp|Q0IIM2|ARL6_BOVIN	ADP-ribosylation factor-like protein 6 OS=Bos taurus GN=ARL6 PE=1 SV=1
	sp|Q0IIK5|DDX1_BOVIN	ATP-dependent RNA helicase DDX1 OS=Bos taurus GN=DDX1 PE=2 SV=1
	sp|Q0IIJ2|H10_BOVIN	Histone H1.0 OS=Bos taurus GN=H1F0 PE=2 SV=3
	sp|Q0III3|DC1I2_BOVIN	Cytoplasmic dynein 1 intermediate chain 2 OS=Bos taurus GN=DYNC1I2 PE=1 SV=1
	sp|Q0IIF7|UBP14_BOVIN	Ubiquitin carboxyl-terminal hydrolase 14 OS=Bos taurus GN=USP14 PE=2 SV=3
	sp|Q0II59|PDXK_BOVIN	Pyridoxal kinase OS=Bos taurus GN=PDXK PE=2 SV=1
	sp|Q0II26|AIMP2_BOVIN	Aminoacyl tRNA synthase complex-interacting multifunctional protein 2 OS=Bos taurus GN=AIMP2 PE=2 SV=1
	sp|Q09430|PROF2_BOVIN	Profilin-2 OS=Bos taurus GN=PFN2 PE=1 SV=2
	sp|Q08E20|ESTD_BOVIN	S-formylglutathione hydrolase OS=Bos taurus GN=ESD PE=2 SV=1
	sp|Q08DW2|KPRA_BOVIN	Phosphoribosyl pyrophosphate synthase-associated protein 1 OS=Bos taurus GN=PRPSAP1 PE=2 SV=1
	sp|Q08DP0|PGM1_BOVIN	Phosphoglucomutase-1 OS=Bos taurus GN=PGM1 PE=2 SV=1
	sp|Q08DD1|ARSA_BOVIN	Arylsulfatase A OS=Bos taurus GN=ARSA PE=2 SV=1
	sp|Q07130|UGPA_BOVIN	UTP--glucose-1-phosphate uridylyltransferase OS=Bos taurus GN=UGP2 PE=1 SV=2
	sp|Q05B89|GTPC1_BOVIN	Putative GTP cyclohydrolase 1 type 2 NIF3L1 OS=Bos taurus GN=NIF3L1 PE=2 SV=1
	sp|Q05B60|NUD14_BOVIN	Uridine diphosphate glucose pyrophosphatase OS=Bos taurus GN=NUDT14 PE=2 SV=1
	sp|Q05927|5NTD_BOVIN	5'-nucleotidase OS=Bos taurus GN=NT5E PE=1 SV=2
	sp|Q05717|IBP5_BOVIN	Insulin-like growth factor-binding protein 5 OS=Bos taurus GN=IGFBP5 PE=2 SV=2
	sp|Q05443|LUM_BOVIN	Lumican OS=Bos taurus GN=LUM PE=1 SV=1
	sp|Q03247|APOE_BOVIN	Apolipoprotein E OS=Bos taurus GN=APOE PE=2 SV=1
	sp|P84080|ARF1_BOVIN	ADP-ribosylation factor 1 OS=Bos taurus GN=ARF1 PE=1 SV=2
	sp|P83939|SCRN1_BOVIN	Secernin-1 OS=Bos taurus GN=SCRN1 PE=1 SV=2
	sp|P81948|TBA4A_BOVIN	Tubulin alpha-4A chain OS=Bos taurus GN=TUBA4A PE=1 SV=2
	sp|P81644|APOA2_BOVIN	Apolipoprotein A-II OS=Bos taurus GN=APOA2 PE=1 SV=2
	sp|P81287|ANXA5_BOVIN	Annexin A5 OS=Bos taurus GN=ANXA5 PE=1 SV=3
	sp|P81282|CSPG2_BOVIN	Versican core protein OS=Bos taurus GN=VCAN PE=1 SV=2
	sp|P81265|PIGR_BOVIN	Polymeric immunoglobulin receptor OS=Bos taurus GN=PIGR PE=2 SV=1
	sp|P81187|CFAB_BOVIN	Complement factor B OS=Bos taurus GN=CFB PE=1 SV=2
	sp|P80724|BASP1_BOVIN	Brain acid soluble protein 1 OS=Bos taurus GN=BASP1 PE=1 SV=3
	sp|P80513|MANF_BOVIN	Mesencephalic astrocyte-derived neurotrophic factor OS=Bos taurus GN=MANF PE=1 SV=2
	sp|P80311|PPIB_BOVIN	Peptidyl-prolyl cis-trans isomerase B OS=Bos taurus GN=PPIB PE=1 SV=4
	sp|P80227|ACPH_BOVIN	Acylamino-acid-releasing enzyme OS=Bos taurus GN=APEH PE=1 SV=2
	sp|P80177|MIF_BOVIN	Macrophage migration inhibitory factor OS=Bos taurus GN=MIF PE=1 SV=6
	sp|P79345|NPC2_BOVIN	Epididymal secretory protein E1 OS=Bos taurus GN=NPC2 PE=1 SV=1
	sp|P79334|PYGM_BOVIN	Glycogen phosphorylase, muscle form OS=Bos taurus GN=PYGM PE=1 SV=3
	sp|P79136|CAPZB_BOVIN	F-actin-capping protein subunit beta OS=Bos taurus GN=CAPZB PE=1 SV=1
	sp|P79135|MX1_BOVIN	Interferon-induced GTP-binding protein Mx1 OS=Bos taurus GN=MX1 PE=2 SV=4
	sp|P79103|RS4_BOVIN	40S ribosomal protein S4 OS=Bos taurus GN=RPS4 PE=2 SV=3
	sp|P79098|AMPN_BOVIN	Aminopeptidase N OS=Bos taurus GN=ANPEP PE=2 SV=4
	sp|P68509|1433F_BOVIN	14-3-3 protein eta OS=Bos taurus GN=YWHAH PE=1 SV=2
	sp|P68401|PA1B2_BOVIN	Platelet-activating factor acetylhydrolase IB subunit beta OS=Bos taurus GN=PAFAH1B2 PE=1 SV=1
	sp|P68399|CSK21_BOVIN	Casein kinase II subunit alpha OS=Bos taurus GN=CSNK2A1 PE=1 SV=1
	sp|P68250|1433B_BOVIN	14-3-3 protein beta/alpha OS=Bos taurus GN=YWHAB PE=1 SV=2
	sp|P68103|EF1A1_BOVIN	Elongation factor 1-alpha 1 OS=Bos taurus GN=EEF1A1 PE=2 SV=1
	sp|P68102|IF2A_BOVIN	Eukaryotic translation initiation factor 2 subunit 1 OS=Bos taurus GN=EIF2S1 PE=2 SV=2
	sp|P67868|CSK2B_BOVIN	Casein kinase II subunit beta OS=Bos taurus GN=CSNK2B PE=1 SV=1
	sp|P67808|YBOX1_BOVIN	Nuclease-sensitive element-binding protein 1 OS=Bos taurus GN=YBX1 PE=2 SV=3
	sp|P67774|PP2AA_BOVIN	Serine/threonine-protein phosphatase 2A catalytic subunit alpha isoform OS=Bos taurus GN=PPP2CA PE=1 SV=1
	sp|P63279|UBC9_HUMAN	SUMO-conjugating enzyme UBC9 OS=Homo sapiens GN=UBE2I PE=1 SV=1
	sp|P63258|ACTG_BOVIN	Actin, cytoplasmic 2 OS=Bos taurus GN=ACTG1 PE=1 SV=1
	sp|P63243|GBLP_BOVIN	Guanine nucleotide-binding protein subunit beta-2-like 1 OS=Bos taurus GN=GNB2L1 PE=2 SV=3
	sp|P63103|1433Z_BOVIN	14-3-3 protein zeta/delta OS=Bos taurus GN=YWHAZ PE=1 SV=1
	sp|P63048|RL40_BOVIN	Ubiquitin-60S ribosomal protein L40 OS=Bos taurus GN=UBA52 PE=1 SV=2
	sp|P63009|AP2B1_BOVIN	AP-2 complex subunit beta OS=Bos taurus GN=AP2B1 PE=1 SV=2
	sp|P62998|RAC1_BOVIN	Ras-related C3 botulinum toxin substrate 1 OS=Bos taurus GN=RAC1 PE=1 SV=1
	sp|P62979|RS27A_HUMAN	Ubiquitin-40S ribosomal protein S27a OS=Homo sapiens GN=RPS27A PE=1 SV=2
	sp|P62964|RABP1_BOVIN	Cellular retinoic acid-binding protein 1 OS=Bos taurus GN=CRABP1 PE=1 SV=2
	sp|P62958|HINT1_BOVIN	Histidine triad nucleotide-binding protein 1 OS=Bos taurus GN=HINT1 PE=1 SV=2
	sp|P62935|PPIA_BOVIN	Peptidyl-prolyl cis-trans isomerase A OS=Bos taurus GN=PPIA PE=1 SV=2
	sp|P62871|GBB1_BOVIN	Guanine nucleotide-binding protein G(I)/G(S)/G(T) subunit beta-1 OS=Bos taurus GN=GNB1 PE=1 SV=3
	sp|P62866|RS30_BOVIN	40S ribosomal protein S30 OS=Bos taurus GN=FAU PE=3 SV=1
	sp|P62833|RAP1A_BOVIN	Ras-related protein Rap-1A OS=Bos taurus GN=RAP1A PE=1 SV=1
	sp|P62326|TYB4_BOVIN	Thymosin beta-4 OS=Bos taurus GN=TMSB4 PE=1 SV=2
	sp|P62285|ASPM_BOVIN	Abnormal spindle-like microcephaly-associated protein homolog (Fragment) OS=Bos taurus GN=ASPM PE=2 SV=1
	sp|P62276|RS29_BOVIN	40S ribosomal protein S29 OS=Bos taurus GN=RPS29 PE=3 SV=2
	sp|P62261|1433E_BOVIN	14-3-3 protein epsilon OS=Bos taurus GN=YWHAE PE=2 SV=1
	sp|P62194|PRS8_BOVIN	26S protease regulatory subunit 8 OS=Bos taurus GN=PSMC5 PE=2 SV=1
	sp|P62157|CALM_BOVIN	Calmodulin OS=Bos taurus GN=CALM PE=1 SV=2
	sp|P61955|SUMO2_BOVIN	Small ubiquitin-related modifier 2 OS=Bos taurus GN=SUMO2 PE=3 SV=1
	sp|P61763|STXB1_BOVIN	Syntaxin-binding protein 1 OS=Bos taurus GN=STXBP1 PE=1 SV=1
	sp|P61635|STAT3_BOVIN	Signal transducer and activator of transcription 3 OS=Bos taurus GN=STAT3 PE=2 SV=1
	sp|P61585|RHOA_BOVIN	Transforming protein RhoA OS=Bos taurus GN=RHOA PE=1 SV=1
	sp|P61356|RL27_BOVIN	60S ribosomal protein L27 OS=Bos taurus GN=RPL27 PE=2 SV=2
	sp|P61286|PABP1_BOVIN	Polyadenylate-binding protein 1 OS=Bos taurus GN=PABPC1 PE=2 SV=1
	sp|P61285|DYL1_BOVIN	Dynein light chain 1, cytoplasmic OS=Bos taurus GN=DYNLL1 PE=1 SV=1
	sp|P61283|BAF_BOVIN	Barrier-to-autointegration factor OS=Bos taurus GN=BANF1 PE=3 SV=1
	sp|P61282|NEDD8_BOVIN	NEDD8 OS=Bos taurus GN=NEDD8 PE=3 SV=1
	sp|P61257|RL26_BOVIN	60S ribosomal protein L26 OS=Bos taurus GN=RPL26 PE=2 SV=1
	sp|P61223|RAP1B_BOVIN	Ras-related protein Rap-1b OS=Bos taurus GN=RAP1B PE=2 SV=1
	sp|P61157|ARP3_BOVIN	Actin-related protein 3 OS=Bos taurus GN=ACTR3 PE=1 SV=3
	sp|P61085|UBE2K_BOVIN	Ubiquitin-conjugating enzyme E2 K OS=Bos taurus GN=UBE2K PE=1 SV=3
	sp|P60984|GMFB_BOVIN	Glia maturation factor beta OS=Bos taurus GN=GMFB PE=1 SV=2
	sp|P60902|S10AA_BOVIN	Protein S100-A10 OS=Bos taurus GN=S100A10 PE=1 SV=2
	sp|P60712|ACTB_BOVIN	Actin, cytoplasmic 1 OS=Bos taurus GN=ACTB PE=1 SV=1
	sp|P60661|MYL6_BOVIN	Myosin light polypeptide 6 OS=Bos taurus GN=MYL6 PE=2 SV=2
	sp|P56965|DDAH1_BOVIN	N(G),N(G)-dimethylarginine dimethylaminohydrolase 1 OS=Bos taurus GN=DDAH1 PE=1 SV=3
	sp|P56701|PSMD2_BOVIN	26S proteasome non-ATPase regulatory subunit 2 OS=Bos taurus GN=PSMD2 PE=1 SV=2
	sp|P56658|ADA_BOVIN	Adenosine deaminase OS=Bos taurus GN=ADA PE=1 SV=3
	sp|P55942|MT1H_BOVIN	Metallothionein-I, hippocampal OS=Bos taurus PE=1 SV=1
	sp|P55918|MFAP4_BOVIN	Microfibril-associated glycoprotein 4 OS=Bos taurus GN=MFAP4 PE=1 SV=2
	sp|P55859|PNPH_BOVIN	Purine nucleoside phosphorylase OS=Bos taurus GN=PNP PE=1 SV=3
	sp|P55052|FABP5_BOVIN	Fatty acid-binding protein, epidermal OS=Bos taurus GN=FABP5 PE=1 SV=4
	sp|P54149|MSRA_BOVIN	Mitochondrial peptide methionine sulfoxide reductase OS=Bos taurus GN=MSRA PE=1 SV=2
	sp|P53620|COPG1_BOVIN	Coatomer subunit gamma-1 OS=Bos taurus GN=COPG1 PE=1 SV=1
	sp|P53619|COPD_BOVIN	Coatomer subunit delta OS=Bos taurus GN=ARCN1 PE=1 SV=1
	sp|P52556|BLVRB_BOVIN	Flavin reductase (NADPH) OS=Bos taurus GN=BLVRB PE=1 SV=2
	sp|P52193|CALR_BOVIN	Calreticulin OS=Bos taurus GN=CALR PE=1 SV=2
	sp|P52175|NDKA2_BOVIN	Nucleoside diphosphate kinase A 2 OS=Bos taurus GN=NME1-2 PE=1 SV=3
	sp|P51176|TGM2_BOVIN	Protein-glutamine gamma-glutamyltransferase 2 OS=Bos taurus GN=TGM2 PE=1 SV=1
	sp|P51122|AN32A_BOVIN	Acidic leucine-rich nuclear phosphoprotein 32 family member A OS=Bos taurus GN=ANP32A PE=1 SV=2
	sp|P50397|GDIB_BOVIN	Rab GDP dissociation inhibitor beta OS=Bos taurus GN=GDI2 PE=2 SV=3
	sp|P50227|ST1A1_BOVIN	Sulfotransferase 1A1 OS=Bos taurus GN=SULT1A1 PE=1 SV=2
	sp|P49951|CLH1_BOVIN	Clathrin heavy chain 1 OS=Bos taurus GN=CLTC PE=1 SV=1
	sp|P49907|SEPP1_BOVIN	Selenoprotein P OS=Bos taurus GN=SEPP1 PE=2 SV=2
	sp|P48644|AL1A1_BOVIN	Retinal dehydrogenase 1 OS=Bos taurus GN=ALDH1A1 PE=2 SV=3
	sp|P48427|TBCA_BOVIN	Tubulin-specific chaperone A OS=Bos taurus GN=TBCA PE=1 SV=3
	sp|P48034|AOXA_BOVIN	Aldehyde oxidase 1 OS=Bos taurus GN=AOX1 PE=1 SV=2
	sp|P46196|MK01_BOVIN	Mitogen-activated protein kinase 1 OS=Bos taurus GN=MAPK1 PE=2 SV=3
	sp|P46195|KGUA_BOVIN	Guanylate kinase OS=Bos taurus GN=GUK1 PE=1 SV=2
	sp|P46193|ANXA1_BOVIN	Annexin A1 OS=Bos taurus GN=ANXA1 PE=2 SV=2
	sp|P42899|RLA2_BOVIN	60S acidic ribosomal protein P2 OS=Bos taurus GN=RPLP2 PE=3 SV=1
	sp|P41541|USO1_BOVIN	General vesicular transport factor p115 OS=Bos taurus GN=USO1 PE=1 SV=1
	sp|P41500|ACYP1_BOVIN	Acylphosphatase-1 OS=Bos taurus GN=ACYP1 PE=1 SV=2
	sp|P41361|ANT3_BOVIN	Antithrombin-III OS=Bos taurus GN=SERPINC1 PE=1 SV=2
	sp|P40682|VAS1_BOVIN	V-type proton ATPase subunit S1 OS=Bos taurus GN=ATP6AP1 PE=1 SV=1
	sp|P40673|HMGB2_BOVIN	High mobility group protein B2 OS=Bos taurus GN=HMGB2 PE=1 SV=3
	sp|P39872|RL3_BOVIN	60S ribosomal protein L3 OS=Bos taurus GN=RPL3 PE=2 SV=2
	sp|P37980|IPYR_BOVIN	Inorganic pyrophosphatase OS=Bos taurus GN=PPA1 PE=1 SV=2
	sp|P37359|MT3_BOVIN	Metallothionein-3 OS=Bos taurus GN=MT3 PE=1 SV=2
	sp|P35908|K22E_HUMAN	Keratin, type II cytoskeletal 2 epidermal OS=Homo sapiens GN=KRT2 PE=1 SV=2
	sp|P35705|PRDX3_BOVIN	Thioredoxin-dependent peroxide reductase, mitochondrial OS=Bos taurus GN=PRDX3 PE=1 SV=2
	sp|P35605|COPB2_BOVIN	Coatomer subunit beta' OS=Bos taurus GN=COPB2 PE=1 SV=3
	sp|P35604|COPZ1_BOVIN	Coatomer subunit zeta-1 OS=Bos taurus GN=COPZ1 PE=1 SV=2
	sp|P35527|K1C9_HUMAN	Keratin, type I cytoskeletal 9 OS=Homo sapiens GN=KRT9 PE=1 SV=3
	sp|P35466|S10A4_BOVIN	Protein S100-A4 OS=Bos taurus GN=S100A4 PE=1 SV=2
	sp|P34955|A1AT_BOVIN	Alpha-1-antiproteinase OS=Bos taurus GN=SERPINA1 PE=1 SV=1
	sp|P34933|HSP72_BOVIN	Heat shock-related 70 kDa protein 2 OS=Bos taurus GN=HSPA2 PE=2 SV=2
	sp|P33672|PSB3_BOVIN	Proteasome subunit beta type-3 OS=Bos taurus GN=PSMB3 PE=1 SV=3
	sp|P33433|HRG_BOVIN	Histidine-rich glycoprotein (Fragments) OS=Bos taurus GN=HRG PE=1 SV=1
	sp|P33097|AATC_BOVIN	Aspartate aminotransferase, cytoplasmic OS=Bos taurus GN=GOT1 PE=1 SV=3
	sp|P31976|EZRI_BOVIN	Ezrin OS=Bos taurus GN=EZR PE=1 SV=2
	sp|P31754|UMPS_BOVIN	Uridine 5'-monophosphate synthase OS=Bos taurus GN=UMPS PE=2 SV=1
	sp|P31717|NMT1_BOVIN	Glycylpeptide N-tetradecanoyltransferase 1 OS=Bos taurus GN=NMT1 PE=1 SV=2
	sp|P31408|VATB2_BOVIN	V-type proton ATPase subunit B, brain isoform OS=Bos taurus GN=ATP6V1B2 PE=1 SV=3
	sp|P31404|VATA_BOVIN	V-type proton ATPase catalytic subunit A OS=Bos taurus GN=ATP6V1A PE=2 SV=2
	sp|P31322|KAP3_BOVIN	cAMP-dependent protein kinase type II-beta regulatory subunit OS=Bos taurus GN=PRKAR2B PE=2 SV=2
	sp|P30932|CD9_BOVIN	CD9 antigen OS=Bos taurus GN=CD9 PE=2 SV=2
	sp|P29702|FNTA_BOVIN	Protein farnesyltransferase/geranylgeranyltransferase type-1 subunit alpha OS=Bos taurus GN=FNTA PE=2 SV=2
	sp|P28801|GSTP1_BOVIN	Glutathione S-transferase P OS=Bos taurus GN=GSTP1 PE=1 SV=2
	sp|P28800|A2AP_BOVIN	Alpha-2-antiplasmin OS=Bos taurus GN=SERPINF2 PE=1 SV=2
	sp|P26884|FKBP3_BOVIN	Peptidyl-prolyl cis-trans isomerase FKBP3 OS=Bos taurus GN=FKBP3 PE=1 SV=2
	sp|P26882|PPID_BOVIN	Peptidyl-prolyl cis-trans isomerase D OS=Bos taurus GN=PPID PE=1 SV=6
	sp|P26779|SAP_BOVIN	Prosaposin OS=Bos taurus GN=PSAP PE=1 SV=3
	sp|P26452|RSSA_BOVIN	40S ribosomal protein SA OS=Bos taurus GN=RPSA PE=2 SV=4
	sp|P25975|CATL1_BOVIN	Cathepsin L1 OS=Bos taurus GN=CTSL PE=1 SV=3
	sp|P25417|CYTB_BOVIN	Cystatin-B OS=Bos taurus GN=CSTB PE=1 SV=1
	sp|P24627|TRFL_BOVIN	Lactotransferrin OS=Bos taurus GN=LTF PE=1 SV=2
	sp|P23805|CONG_BOVIN	Conglutinin OS=Bos taurus GN=CGN1 PE=1 SV=2
	sp|P23727|P85A_BOVIN	Phosphatidylinositol 3-kinase regulatory subunit alpha OS=Bos taurus GN=PIK3R1 PE=1 SV=1
	sp|P23196|APEX1_BOVIN	DNA-(apurinic or apyrimidinic site) lyase OS=Bos taurus GN=APEX1 PE=1 SV=2
	sp|P22226|CTHL1_BOVIN	Cathelicidin-1 OS=Bos taurus GN=CATHL1 PE=1 SV=2
	sp|P21856|GDIA_BOVIN	Rab GDP dissociation inhibitor alpha OS=Bos taurus GN=GDI1 PE=1 SV=1
	sp|P21782|PTN_BOVIN	Pleiotrophin OS=Bos taurus GN=PTN PE=1 SV=2
	sp|P21752|TYB10_BOVIN	Thymosin beta-10 OS=Bos taurus GN=TMSB10 PE=1 SV=2
	sp|P20811|ICAL_BOVIN	Calpastatin OS=Bos taurus GN=CAST PE=1 SV=2
	sp|P20456|IMPA1_BOVIN	Inositol monophosphatase 1 OS=Bos taurus GN=IMPA1 PE=1 SV=1
	sp|P20414|TIMP1_BOVIN	Metalloproteinase inhibitor 1 OS=Bos taurus GN=TIMP1 PE=1 SV=1
	sp|P20072|ANXA7_BOVIN	Annexin A7 OS=Bos taurus GN=ANXA7 PE=1 SV=2
	sp|P19858|LDHA_BOVIN	L-lactate dehydrogenase A chain OS=Bos taurus GN=LDHA PE=2 SV=2
	sp|P19803|GDIR1_BOVIN	Rho GDP-dissociation inhibitor 1 OS=Bos taurus GN=ARHGDIA PE=1 SV=3
	sp|P19120|HSP7C_BOVIN	Heat shock cognate 71 kDa protein OS=Bos taurus GN=HSPA8 PE=1 SV=2
	sp|P19035|APOC3_BOVIN	Apolipoprotein C-III OS=Bos taurus GN=APOC3 PE=1 SV=2
	sp|P18203|FKB1A_BOVIN	Peptidyl-prolyl cis-trans isomerase FKBP1A OS=Bos taurus GN=FKBP1A PE=1 SV=2
	sp|P18130|ADA1A_BOVIN	Alpha-1A adrenergic receptor OS=Bos taurus GN=ADRA1A PE=2 SV=1
	sp|P17697|CLUS_BOVIN	Clusterin OS=Bos taurus GN=CLU PE=1 SV=1
	sp|P17690|APOH_BOVIN	Beta-2-glycoprotein 1 OS=Bos taurus GN=APOH PE=1 SV=4
	sp|P17248|SYWC_BOVIN	Tryptophan--tRNA ligase, cytoplasmic OS=Bos taurus GN=WARS PE=1 SV=3
	sp|P15497|APOA1_BOVIN	Apolipoprotein A-I OS=Bos taurus GN=APOA1 PE=1 SV=3
	sp|P15396|ENPP3_BOVIN	Ectonucleotide pyrophosphatase/phosphodiesterase family member 3 OS=Bos taurus GN=ENPP3 PE=1 SV=2
	sp|P15246|PIMT_BOVIN	Protein-L-isoaspartate(D-aspartate) O-methyltransferase OS=Bos taurus GN=PCMT1 PE=1 SV=2
	sp|P15103|GLNA_BOVIN	Glutamine synthetase OS=Bos taurus GN=GLUL PE=2 SV=4
	sp|P13753|HA1B_BOVIN	BOLA class I histocompatibility antigen, alpha chain BL3-7 OS=Bos taurus PE=2 SV=1
	sp|P13696|PEBP1_BOVIN	Phosphatidylethanolamine-binding protein 1 OS=Bos taurus GN=PEBP1 PE=1 SV=2
	sp|P13645|K1C10_HUMAN	Keratin, type I cytoskeletal 10 OS=Homo sapiens GN=KRT10 PE=1 SV=6
	sp|P13384|IBP2_BOVIN	Insulin-like growth factor-binding protein 2 OS=Bos taurus GN=IGFBP2 PE=1 SV=2
	sp|P13214|ANXA4_BOVIN	Annexin A4 OS=Bos taurus GN=ANXA4 PE=1 SV=2
	sp|P13213|SPRC_BOVIN	SPARC OS=Bos taurus GN=SPARC PE=1 SV=2
	sp|P13135|CPNS1_BOVIN	Calpain small subunit 1 OS=Bos taurus GN=CAPNS1 PE=2 SV=1
	sp|P12820|ACE_BOVIN	Angiotensin-converting enzyme (Fragment) OS=Bos taurus GN=ACE PE=1 SV=2
	sp|P12763|FETUA_BOVIN	Alpha-2-HS-glycoprotein OS=Bos taurus GN=AHSG PE=1 SV=2
	sp|P12378|UGDH_BOVIN	UDP-glucose 6-dehydrogenase OS=Bos taurus GN=UGDH PE=1 SV=2
	sp|P11834|OPCM_BOVIN	Opioid-binding protein/cell adhesion molecule OS=Bos taurus GN=OPCML PE=1 SV=1
	sp|P11151|LIPL_BOVIN	Lipoprotein lipase OS=Bos taurus GN=LPL PE=1 SV=2
	sp|P11116|LEG1_BOVIN	Galectin-1 OS=Bos taurus GN=LGALS1 PE=1 SV=2
	sp|P11019|VATE1_BOVIN	V-type proton ATPase subunit E 1 OS=Bos taurus GN=ATP6V1E1 PE=2 SV=1
	sp|P11017|GBB2_BOVIN	Guanine nucleotide-binding protein G(I)/G(S)/G(T) subunit beta-2 OS=Bos taurus GN=GNB2 PE=2 SV=3
	sp|P10462|S10A2_BOVIN	Protein S100-A2 OS=Bos taurus GN=S100A2 PE=1 SV=1
	sp|P10103|HMGB1_BOVIN	High mobility group protein B1 OS=Bos taurus GN=HMGB1 PE=1 SV=3
	sp|P10096|G3P_BOVIN	Glyceraldehyde-3-phosphate dehydrogenase OS=Bos taurus GN=GAPDH PE=1 SV=4
	sp|P0CB32|HS71L_BOVIN	Heat shock 70 kDa protein 1-like OS=Bos taurus GN=HSPA1L PE=3 SV=1
	sp|P0C1G6|SWP70_BOVIN	Switch-associated protein 70 OS=Bos taurus GN=SWAP70 PE=1 SV=1
	sp|P09867|ROA1_BOVIN	Heterogeneous nuclear ribonucleoprotein A1 OS=Bos taurus GN=HNRNPA1 PE=1 SV=2
	sp|P09487|PPBT_BOVIN	Alkaline phosphatase, tissue-nonspecific isozyme OS=Bos taurus GN=ALPL PE=1 SV=2
	sp|P08728|K1C19_BOVIN	Keratin, type I cytoskeletal 19 OS=Bos taurus GN=KRT19 PE=2 SV=1
	sp|P08037|B4GT1_BOVIN	Beta-1,4-galactosyltransferase 1 OS=Bos taurus GN=B4GALT1 PE=1 SV=3
	sp|P07688|CATB_BOVIN	Cathepsin B OS=Bos taurus GN=CTSB PE=1 SV=5
	sp|P07589|FINC_BOVIN	Fibronectin OS=Bos taurus GN=FN1 PE=1 SV=4
	sp|P07107|ACBP_BOVIN	Acyl-CoA-binding protein OS=Bos taurus GN=DBI PE=1 SV=2
	sp|P06868|PLMN_BOVIN	Plasminogen OS=Bos taurus GN=PLG PE=1 SV=2
	sp|P06623|CN37_BOVIN	2',3'-cyclic-nucleotide 3'-phosphodiesterase OS=Bos taurus GN=CNP PE=2 SV=2
	sp|P05786|K2C8_BOVIN	Keratin, type II cytoskeletal 8 OS=Bos taurus GN=KRT8 PE=2 SV=3
	sp|P04973|CLCA_BOVIN	Clathrin light chain A OS=Bos taurus GN=CLTA PE=1 SV=1
	sp|P04896|GNAS2_BOVIN	Guanine nucleotide-binding protein G(s) subunit alpha isoforms short OS=Bos taurus GN=GNAS PE=1 SV=1
	sp|P04745|AMY1_HUMAN	Alpha-amylase 1 OS=Homo sapiens GN=AMY1A PE=1 SV=2
	sp|P04272|ANXA2_BOVIN	Annexin A2 OS=Bos taurus GN=ANXA2 PE=1 SV=2
	sp|P04264|K2C1_HUMAN	Keratin, type II cytoskeletal 1 OS=Homo sapiens GN=KRT1 PE=1 SV=6
	sp|P02769|ALBU_BOVIN	Serum albumin OS=Bos taurus GN=ALB PE=1 SV=4
	sp|P02768|ALBU_HUMAN	Serum albumin OS=Homo sapiens GN=ALB PE=1 SV=2
	sp|P02702|FOLR1_BOVIN	Folate receptor alpha OS=Bos taurus GN=FOLR1 PE=1 SV=3
	sp|P02676|FIBB_BOVIN	Fibrinogen beta chain OS=Bos taurus GN=FGB PE=1 SV=2
	sp|P02639|S10A1_BOVIN	Protein S100-A1 OS=Bos taurus GN=S100A1 PE=1 SV=2
	sp|P02638|S100B_BOVIN	Protein S100-B OS=Bos taurus GN=S100B PE=1 SV=2
	sp|P02584|PROF1_BOVIN	Profilin-1 OS=Bos taurus GN=PFN1 PE=1 SV=2
	sp|P02510|CRYAB_BOVIN	Alpha-crystallin B chain OS=Bos taurus GN=CRYAB PE=1 SV=2
	sp|P02316|HMGN1_BOVIN	Non-histone chromosomal protein HMG-14 OS=Bos taurus GN=HMGN1 PE=1 SV=2
	sp|P02313|HMGN2_BOVIN	Non-histone chromosomal protein HMG-17 OS=Bos taurus GN=HMGN2 PE=1 SV=2
	sp|P02081|HBBF_BOVIN	Hemoglobin fetal subunit beta OS=Bos taurus PE=1 SV=1
	sp|P02070|HBB_BOVIN	Hemoglobin subunit beta OS=Bos taurus GN=HBB PE=1 SV=1
	sp|P01966|HBA_BOVIN	Hemoglobin subunit alpha OS=Bos taurus GN=HBA PE=1 SV=2
	sp|P01888|B2MG_BOVIN	Beta-2-microglobulin OS=Bos taurus GN=B2M PE=1 SV=2
	sp|P01252|PTMA_BOVIN	Prothymosin alpha OS=Bos taurus GN=PTMA PE=1 SV=2
	sp|P01112|RASH_HUMAN	GTPase HRas OS=Homo sapiens GN=HRAS PE=1 SV=1
	sp|P01045|KNG2_BOVIN	Kininogen-2 OS=Bos taurus GN=KNG2 PE=1 SV=1
	sp|P01035|CYTC_BOVIN	Cystatin-C OS=Bos taurus GN=CST3 PE=1 SV=2
	sp|P01008|ANT3_HUMAN	Antithrombin-III OS=Homo sapiens GN=SERPINC1 PE=1 SV=1
	sp|P00974|BPT1_BOVIN	Pancreatic trypsin inhibitor OS=Bos taurus PE=1 SV=2
	sp|P00921|CAH2_BOVIN	Carbonic anhydrase 2 OS=Bos taurus GN=CA2 PE=1 SV=3
	sp|P00761|TRYP_PIG	Trypsin OS=Sus scrofa PE=1 SV=1
	sp|P00745|PROC_BOVIN	Vitamin K-dependent protein C (Fragment) OS=Bos taurus GN=PROC PE=1 SV=1
	sp|P00744|PROZ_BOVIN	Vitamin K-dependent protein Z OS=Bos taurus GN=PROZ PE=1 SV=1
	sp|P00741|FA9_BOVIN	Coagulation factor IX (Fragment) OS=Bos taurus GN=F9 PE=1 SV=1
	sp|P00735|THRB_BOVIN	Prothrombin OS=Bos taurus GN=F2 PE=1 SV=2
	sp|P00727|AMPL_BOVIN	Cytosol aminopeptidase OS=Bos taurus GN=LAP3 PE=1 SV=3
	sp|P00570|KAD1_BOVIN	Adenylate kinase isoenzyme 1 OS=Bos taurus GN=AK1 PE=1 SV=2
	sp|P00515|KAP2_BOVIN	cAMP-dependent protein kinase type II-alpha regulatory subunit OS=Bos taurus GN=PRKAR2A PE=1 SV=2
	sp|P00514|KAP0_BOVIN	cAMP-dependent protein kinase type I-alpha regulatory subunit OS=Bos taurus GN=PRKAR1A PE=1 SV=2
	sp|P00442|SODC_BOVIN	Superoxide dismutase [Cu-Zn] OS=Bos taurus GN=SOD1 PE=1 SV=2
	sp|P00435|GPX1_BOVIN	Glutathione peroxidase 1 OS=Bos taurus GN=GPX1 PE=1 SV=3
	sp|P00432|CATA_BOVIN	Catalase OS=Bos taurus GN=CAT PE=1 SV=3
	sp|O97764|QOR_BOVIN	Zeta-crystallin OS=Bos taurus GN=CRYZ PE=2 SV=2
	sp|O97680|THIO_BOVIN	Thioredoxin OS=Bos taurus GN=TXN PE=3 SV=3
	sp|O77834|PRDX6_BOVIN	Peroxiredoxin-6 OS=Bos taurus GN=PRDX6 PE=1 SV=3
	sp|O62830|PPM1B_BOVIN	Protein phosphatase 1B OS=Bos taurus GN=PPM1B PE=2 SV=2
	sp|O62768|TRXR1_BOVIN	Thioredoxin reductase 1, cytoplasmic OS=Bos taurus GN=TXNRD1 PE=2 SV=3
	sp|O46563|VATH_BOVIN	V-type proton ATPase subunit H OS=Bos taurus GN=ATP6V1H PE=2 SV=2
	sp|O46375|TTHY_BOVIN	Transthyretin OS=Bos taurus GN=TTR PE=1 SV=1
	sp|O18883|TXND9_BOVIN	Thioredoxin domain-containing protein 9 OS=Bos taurus GN=TXNDC9 PE=2 SV=2
	sp|O18789|RS2_BOVIN	40S ribosomal protein S2 OS=Bos taurus GN=RPS2 PE=2 SV=2
	sp|O02853|PTGDS_BOVIN	Prostaglandin-H2 D-isomerase OS=Bos taurus GN=PTGDS PE=1 SV=1
	sp|O02659|MBL2_BOVIN	Mannose-binding protein C OS=Bos taurus GN=MBL PE=2 SV=1
	sp|G3X745|GPC1_BOVIN	Glypican-1 OS=Bos taurus GN=GPC1 PE=2 SV=1
	sp|F1N152|HTRA1_BOVIN	Serine protease HTRA1 OS=Bos taurus GN=HTRA1 PE=2 SV=1
	sp|F1MLB4|DAAF3_BOVIN	Dynein assembly factor 3, axonemal OS=Bos taurus GN=DNAAF3 PE=3 SV=2
	sp|F1MCY2|PHAR4_BOVIN	Phosphatase and actin regulator 4 OS=Bos taurus GN=PHACTR4 PE=2 SV=1
	sp|E1BNQ4|NNRD_BOVIN	ATP-dependent (S)-NAD(P)H-hydrate dehydratase OS=Bos taurus GN=CARKD PE=3 SV=1
	sp|E1BLK7|MIEAP_BOVIN	Mitochondria-eating protein OS=Bos taurus GN=SPATA18 PE=3 SV=1
	sp|E1BF81|CBG_BOVIN	Corticosteroid-binding globulin OS=Bos taurus GN=SERPINA6 PE=3 SV=1
	sp|E1BCH6|ISPD_BOVIN	Isoprenoid synthase domain-containing protein OS=Bos taurus GN=ISPD PE=3 SV=2
	sp|A7YY28|ABHEB_BOVIN	Alpha/beta hydrolase domain-containing protein 14B OS=Bos taurus GN=ABHD14B PE=2 SV=1
	sp|A7YW98|SYRC_BOVIN	Arginine--tRNA ligase, cytoplasmic OS=Bos taurus GN=RARS PE=2 SV=1
	sp|A7YW45|ANM5_BOVIN	Protein arginine N-methyltransferase 5 OS=Bos taurus GN=PRMT5 PE=2 SV=1
	sp|A7MBJ5|CAND1_BOVIN	Cullin-associated NEDD8-dissociated protein 1 OS=Bos taurus GN=CAND1 PE=2 SV=1
	sp|A7MBJ4|PTPRF_BOVIN	Receptor-type tyrosine-protein phosphatase F OS=Bos taurus GN=PTPRF PE=2 SV=1
	sp|A7MBG0|PURA2_BOVIN	Adenylosuccinate synthetase isozyme 2 OS=Bos taurus GN=ADSS PE=2 SV=2
	sp|A7MBC2|PDXD1_BOVIN	Pyridoxal-dependent decarboxylase domain-containing protein 1 OS=Bos taurus GN=PDXDC1 PE=2 SV=1
	sp|A7MBC0|NAGA_BOVIN	Putative N-acetylglucosamine-6-phosphate deacetylase OS=Bos taurus GN=AMDHD2 PE=2 SV=1
	sp|A7MB78|GYS1_BOVIN	Glycogen [starch] synthase, muscle OS=Bos taurus GN=GYS1 PE=2 SV=1
	sp|A7MB62|ARP2_BOVIN	Actin-related protein 2 OS=Bos taurus GN=ACTR2 PE=1 SV=1
	sp|A7MB16|EIF3B_BOVIN	Eukaryotic translation initiation factor 3 subunit B OS=Bos taurus GN=EIF3B PE=2 SV=1
	sp|A7MAZ3|UBA5_BOVIN	Ubiquitin-like modifier-activating enzyme 5 OS=Bos taurus GN=UBA5 PE=2 SV=1
	sp|A7E3W2|LG3BP_BOVIN	Galectin-3-binding protein OS=Bos taurus GN=LGALS3BP PE=1 SV=1
	sp|A7E3Q8|PLST_BOVIN	Plastin-3 OS=Bos taurus GN=PLS3 PE=2 SV=1
	sp|A6QR56|A16A1_BOVIN	Aldehyde dehydrogenase family 16 member A1 OS=Bos taurus GN=ALDH16A1 PE=2 SV=1
	sp|A6QR55|UBP4_BOVIN	Ubiquitin carboxyl-terminal hydrolase 4 OS=Bos taurus GN=USP4 PE=2 SV=1
	sp|A6QQM4|ZN474_BOVIN	Zinc finger protein 474 OS=Bos taurus GN=ZNF474 PE=2 SV=1
	sp|A6QQ85|UPK3L_BOVIN	Uroplakin-3b-like protein OS=Bos taurus GN=UPK3BL PE=2 SV=2
	sp|A6QPY0|OST48_BOVIN	Dolichyl-diphosphooligosaccharide--protein glycosyltransferase 48 kDa subunit OS=Bos taurus GN=DDOST PE=2 SV=2
	sp|A6QPQ2|SPA38_BOVIN	Serpin A3-8 OS=Bos taurus GN=SERPINA3-8 PE=2 SV=1
	sp|A6QP05|DHR12_BOVIN	Dehydrogenase/reductase SDR family member 12 OS=Bos taurus GN=DHRS12 PE=2 SV=1
	sp|A6QLU7|F115C_BOVIN	Protein FAM115C OS=Bos taurus GN=FAM115C PE=2 SV=1
	sp|A6QLJ8|PTER_BOVIN	Phosphotriesterase-related protein OS=Bos taurus GN=PTER PE=2 SV=1
	sp|A6QLG5|RS9_BOVIN	40S ribosomal protein S9 OS=Bos taurus GN=RPS9 PE=2 SV=1
	sp|A6H7I5|DYN2_BOVIN	Dynamin-2 OS=Bos taurus GN=DNM2 PE=2 SV=1
	sp|A6H7G2|DBNL_BOVIN	Drebrin-like protein OS=Bos taurus GN=DBNL PE=2 SV=1
	sp|A6H7B5|CSN3_BOVIN	COP9 signalosome complex subunit 3 OS=Bos taurus GN=COPS3 PE=2 SV=1
	sp|A6H769|RS7_BOVIN	40S ribosomal protein S7 OS=Bos taurus GN=RPS7 PE=2 SV=1
	sp|A6H768|GALK1_BOVIN	Galactokinase OS=Bos taurus GN=GALK1 PE=2 SV=2
	sp|A6H767|NP1L1_BOVIN	Nucleosome assembly protein 1-like 1 OS=Bos taurus GN=NAP1L1 PE=2 SV=1
	sp|A6H742|PLSI_BOVIN	Plastin-1 OS=Bos taurus GN=PLS1 PE=2 SV=1
	sp|A5PKL1|OXR1_BOVIN	Oxidation resistance protein 1 OS=Bos taurus GN=OXR1 PE=2 SV=2
	sp|A5PKH3|FAAA_BOVIN	Fumarylacetoacetase OS=Bos taurus GN=FAH PE=2 SV=1
	sp|A5PK65|DOPD_BOVIN	D-dopachrome decarboxylase OS=Bos taurus GN=DDT PE=3 SV=1
	sp|A5PK63|RS17_BOVIN	40S ribosomal protein S17 OS=Bos taurus GN=RPS17 PE=2 SV=1
	sp|A5PK51|PNCB_BOVIN	Nicotinate phosphoribosyltransferase OS=Bos taurus GN=NAPRT1 PE=2 SV=2
	sp|A5PK00|VPS36_BOVIN	Vacuolar protein-sorting-associated protein 36 OS=Bos taurus GN=VPS36 PE=2 SV=1
	sp|A5D989|EF1D_BOVIN	Elongation factor 1-delta OS=Bos taurus GN=EEF1D PE=2 SV=2
	sp|A5D7D1|ACTN4_BOVIN	Alpha-actinin-4 OS=Bos taurus GN=ACTN4 PE=2 SV=1
	sp|A5D7A0|EFHD2_BOVIN	EF-hand domain-containing protein D2 OS=Bos taurus GN=EFHD2 PE=2 SV=1
	sp|A5D785|XPO2_BOVIN	Exportin-2 OS=Bos taurus GN=CSE1L PE=2 SV=1
	sp|A4IFC4|SH3L2_BOVIN	SH3 domain-binding glutamic acid-rich-like protein 2 OS=Bos taurus GN=SH3BGRL2 PE=3 SV=1
	sp|A4IF97|ML12B_BOVIN	Myosin regulatory light chain 12B OS=Bos taurus GN=MYL12B PE=2 SV=1
	sp|A4IF89|EXOC8_BOVIN	Exocyst complex component 8 OS=Bos taurus GN=EXOC8 PE=2 SV=1
	sp|A4IF78|TFIP8_BOVIN	Tumor necrosis factor alpha-induced protein 8 OS=Bos taurus GN=TNFAIP8 PE=2 SV=1
	sp|A4IF69|NHLC2_BOVIN	NHL repeat-containing protein 2 OS=Bos taurus GN=NHLRC2 PE=2 SV=1
	sp|A4FV54|RAB8A_BOVIN	Ras-related protein Rab-8A OS=Bos taurus GN=RAB8A PE=2 SV=1
	sp|A4FUG8|RABE2_BOVIN	Rab GTPase-binding effector protein 2 OS=Bos taurus GN=RABEP2 PE=2 SV=1
	sp|A4FUE7|ZC21A_BOVIN	Zinc finger C2HC domain-containing protein 1A OS=Bos taurus GN=ZC2HC1A PE=2 SV=1
	sp|A4FUD9|MCM3_BOVIN	DNA replication licensing factor MCM3 OS=Bos taurus GN=MCM3 PE=2 SV=1
	sp|A4FUA8|CAZA1_BOVIN	F-actin-capping protein subunit alpha-1 OS=Bos taurus GN=CAPZA1 PE=2 SV=1
	sp|A3KN12|PUR8_BOVIN	Adenylosuccinate lyase OS=Bos taurus GN=ADSL PE=2 SV=1
	sp|A3KMY4|CTL4_BOVIN	Choline transporter-like protein 4 OS=Bos taurus GN=SLC44A4 PE=2 SV=1
	sp|A3KMX8|CF211_BOVIN	UPF0364 protein C6orf211 homolog OS=Bos taurus PE=2 SV=1
	sp|A3KMV5|UBA1_BOVIN	Ubiquitin-like modifier-activating enzyme 1 OS=Bos taurus GN=UBA1 PE=2 SV=1
	sp|A2VE99|SEP11_BOVIN	Septin-11 OS=Bos taurus GN=SEPT11 PE=2 SV=1
	sp|A2VE14|SAE1_BOVIN	SUMO-activating enzyme subunit 1 OS=Bos taurus GN=SAE1 PE=2 SV=1
	sp|A2VDS0|KPRB_BOVIN	Phosphoribosyl pyrophosphate synthase-associated protein 2 OS=Bos taurus GN=PRPSAP2 PE=2 SV=1
	sp|A2VDK6|WASF2_BOVIN	Wiskott-Aldrich syndrome protein family member 2 OS=Bos taurus GN=WASF2 PE=2 SV=1
	sp|A2I7N3|SPA37_BOVIN	Serpin A3-7 OS=Bos taurus GN=SERPINA3-7 PE=3 SV=1
	sp|A1L5A6|ADRM1_BOVIN	Proteasomal ubiquitin receptor ADRM1 OS=Bos taurus GN=ADRM1 PE=2 SV=1
	sp|A1A4R1|H2A2C_BOVIN	Histone H2A type 2-C OS=Bos taurus GN=HIST2H2AC PE=2 SV=1
	sp|A1A4P5|PFD2_BOVIN	Prefoldin subunit 2 OS=Bos taurus GN=PFDN2 PE=2 SV=1
	sp|A1A4K5|ENPP2_BOVIN	Ectonucleotide pyrophosphatase/phosphodiesterase family member 2 OS=Bos taurus GN=ENPP2 PE=1 SV=1
	sp|A1A4K3|DDB1_BOVIN	DNA damage-binding protein 1 OS=Bos taurus GN=DDB1 PE=2 SV=1
	sp|A1A4J1|K6PL_BOVIN	6-phosphofructokinase, liver type OS=Bos taurus GN=PFKL PE=2 SV=1
	sp|A0JN39|COPB_BOVIN	Coatomer subunit beta OS=Bos taurus GN=COPB1 PE=1 SV=1
	REVERSE_tr|Q5BIR8|Q5BIR8_BOVIN-R	Fasciculation and elongation protein zeta 1 (Zygin I) OS=Bos taurus GN=FEZ1 PE=2 SV=1
	REVERSE_tr|Q1JPG7|Q1JPG7_BOVIN-R	Pyruvate kinase OS=Bos taurus GN=PKLR PE=2 SV=1
	REVERSE_tr|G3X8E2|G3X8E2_BOVIN-R	Uncharacterized protein (Fragment) OS=Bos taurus GN=VPS4A PE=2 SV=1
	REVERSE_tr|G3X7E9|G3X7E9_BOVIN-R	Uncharacterized protein OS=Bos taurus GN=IL13RA1 PE=4 SV=1
	REVERSE_tr|G3N3C7|G3N3C7_BOVIN-R	Uncharacterized protein (Fragment) OS=Bos taurus GN=FAM13B PE=4 SV=1
	REVERSE_tr|G3MYZ4|G3MYZ4_BOVIN-R	Uncharacterized protein OS=Bos taurus GN=DCP2 PE=4 SV=1
	REVERSE_tr|G3MYW8|G3MYW8_BOVIN-R	Uncharacterized protein OS=Bos taurus PE=4 SV=1
	REVERSE_tr|G3MX05|G3MX05_BOVIN-R	Uncharacterized protein OS=Bos taurus GN=EID1 PE=4 SV=1
	REVERSE_tr|F1N4J2|F1N4J2_BOVIN-R	Uncharacterized protein (Fragment) OS=Bos taurus GN=SACS PE=4 SV=2
	REVERSE_tr|F1N325|F1N325_BOVIN-R	Uncharacterized protein OS=Bos taurus GN=TTLL10 PE=4 SV=2
	REVERSE_tr|F1N264|F1N264_BOVIN-R	Uncharacterized protein (Fragment) OS=Bos taurus GN=ZEB1 PE=3 SV=2
	REVERSE_tr|F1N1F8|F1N1F8_BOVIN-R	Uncharacterized protein OS=Bos taurus GN=CENPF PE=4 SV=2
	REVERSE_tr|F1N072|F1N072_BOVIN-R	Uncharacterized protein OS=Bos taurus GN=PPP4R4 PE=4 SV=2
	REVERSE_tr|F1MZV6|F1MZV6_BOVIN-R	Uncharacterized protein (Fragment) OS=Bos taurus GN=C2orf54 PE=4 SV=1
	REVERSE_tr|F1MX80|F1MX80_BOVIN-R	Uncharacterized protein OS=Bos taurus GN=METTL3 PE=4 SV=1
	REVERSE_tr|F1MRB9|F1MRB9_BOVIN-R	Uncharacterized protein OS=Bos taurus GN=NOL8 PE=4 SV=2
	REVERSE_tr|F1MMT3|F1MMT3_BOVIN-R	Uncharacterized protein OS=Bos taurus GN=MPDZ PE=4 SV=2
	REVERSE_tr|F1MLG3|F1MLG3_BOVIN-R	Uncharacterized protein (Fragment) OS=Bos taurus GN=TRAPPC8 PE=4 SV=1
	REVERSE_tr|F1ML08|F1ML08_BOVIN-R	Uncharacterized protein OS=Bos taurus GN=CCDC132 PE=4 SV=1
	REVERSE_tr|F1MJR5|F1MJR5_BOVIN-R	Uncharacterized protein OS=Bos taurus GN=PLEKHA3 PE=4 SV=1
	REVERSE_tr|F1MJ58|F1MJ58_BOVIN-R	Uncharacterized protein OS=Bos taurus GN=ECT2 PE=4 SV=2
	REVERSE_tr|F1MHR6|F1MHR6_BOVIN-R	Uncharacterized protein (Fragment) OS=Bos taurus GN=KHSRP PE=4 SV=2
	REVERSE_tr|F1MHG0|F1MHG0_BOVIN-R	Uncharacterized protein (Fragment) OS=Bos taurus GN=MYO7A PE=4 SV=2
	REVERSE_tr|F1MCE7|F1MCE7_BOVIN-R	Uncharacterized protein OS=Bos taurus GN=BMPR1A PE=2 SV=2
	REVERSE_tr|F1MBI8|F1MBI8_BOVIN-R	Uncharacterized protein OS=Bos taurus GN=SYNGAP1 PE=4 SV=2
	REVERSE_tr|E1BLT9|E1BLT9_BOVIN-R	Uncharacterized protein (Fragment) OS=Bos taurus GN=ARMC5 PE=4 SV=2
	REVERSE_tr|E1BK38|E1BK38_BOVIN-R	Uncharacterized protein (Fragment) OS=Bos taurus GN=ABCA13 PE=4 SV=2
	REVERSE_tr|E1BIE4|E1BIE4_BOVIN-R	Uncharacterized protein OS=Bos taurus GN=EPHB4 PE=4 SV=2
	REVERSE_tr|E1BFC5|E1BFC5_BOVIN-R	Uncharacterized protein OS=Bos taurus GN=FAM222B PE=4 SV=1
	REVERSE_tr|E1BFC3|E1BFC3_BOVIN-R	Uncharacterized protein OS=Bos taurus GN=DFNA5 PE=4 SV=1
	REVERSE_tr|E1BEH3|E1BEH3_BOVIN-R	Uncharacterized protein (Fragment) OS=Bos taurus GN=KCNK15 PE=3 SV=2
	REVERSE_tr|E1BC24|E1BC24_BOVIN-R	Midasin OS=Bos taurus GN=MDN1 PE=3 SV=2
	REVERSE_tr|E1BB39|E1BB39_BOVIN-R	Uncharacterized protein OS=Bos taurus GN=VWA5B1 PE=4 SV=2
	REVERSE_tr|E1BAS5|E1BAS5_BOVIN-R	Insulin-like 3 OS=Bos taurus GN=RLF PE=4 SV=2
	REVERSE_tr|E1B9N6|E1B9N6_BOVIN-R	Uncharacterized protein OS=Bos taurus GN=EVPL PE=4 SV=1
	REVERSE_tr|E1B828|E1B828_BOVIN-R	Uncharacterized protein OS=Bos taurus GN=LEMD2 PE=4 SV=1
	REVERSE_tr|A7MBG2|A7MBG2_BOVIN-R	FAM108B1 protein OS=Bos taurus GN=FAM108B1 PE=2 SV=1
	REVERSE_sp|Q3T131|COQ3_BOVIN-R	Hexaprenyldihydroxybenzoate methyltransferase, mitochondrial OS=Bos taurus GN=COQ3 PE=2 SV=1
	REVERSE_sp|Q2NKY8|DHX30_BOVIN-R	Putative ATP-dependent RNA helicase DHX30 OS=Bos taurus GN=DHX30 PE=2 SV=1
	REVERSE_sp|Q2KI85|SMTL2_BOVIN-R	Smoothelin-like protein 2 OS=Bos taurus GN=SMTNL2 PE=2 SV=1
	REVERSE_sp|Q24K02|IDE_BOVIN-R	Insulin-degrading enzyme OS=Bos taurus GN=IDE PE=2 SV=1
	REVERSE_sp|Q1JQA0|PPT2_BOVIN-R	Lysosomal thioesterase PPT2 OS=Bos taurus GN=PPT2 PE=2 SV=1
	REVERSE_sp|Q0P565|HDDC2_BOVIN-R	HD domain-containing protein 2 OS=Bos taurus GN=HDDC2 PE=2 SV=1
	REVERSE_sp|P82919|RT18A_BOVIN-R	28S ribosomal protein S18a, mitochondrial OS=Bos taurus GN=MRPS18A PE=1 SV=3
	REVERSE_sp|P32749|CHLE_BOVIN-R	Cholinesterase OS=Bos taurus GN=BCHE PE=2 SV=2
	REVERSE_sp|P27922|SC6A3_BOVIN-R	Sodium-dependent dopamine transporter OS=Bos taurus GN=SLC6A3 PE=2 SV=1
	REVERSE_sp|A6QP70|SGCB_BOVIN-R	Beta-sarcoglycan OS=Bos taurus GN=SGCB PE=2 SV=1
	REVERSE_sp|A5D979|SPRTN_BOVIN-R	SprT-like domain-containing protein Spartan OS=Bos taurus GN=SPRTN PE=2 SV=1
	sp|Q05589|UROK_BOVIN	Urokinase-type plasminogen activator OS=Bos taurus GN=PLAU PE=2 SV=1
	tr|Q2HJ34|Q2HJ34_BOVIN	Nephroblastoma overexpressed OS=Bos taurus GN=NOV PE=2 SV=1
	sp|P50291|FST_BOVIN	Follistatin OS=Bos taurus GN=FST PE=2 SV=2
	tr|F1MTV9|F1MTV9_BOVIN	Nucleophosmin OS=Bos taurus GN=NPM1 PE=4 SV=2
	sp|P31096|OSTP_BOVIN	Osteopontin OS=Bos taurus GN=SPP1 PE=1 SV=2
	tr|F1N455|F1N455_BOVIN	Dipeptidyl peptidase 1 OS=Bos taurus GN=CTSC PE=3 SV=1
	tr|A6QPW7|A6QPW7_BOVIN	TNFRSF6B protein OS=Bos taurus GN=TNFRSF6B PE=2 SV=1
	sp|O77588|PLOD1_BOVIN	Procollagen-lysine,2-oxoglutarate 5-dioxygenase 1 OS=Bos taurus GN=PLOD1 PE=2 SV=2
	sp|P20959|IBP3_BOVIN	Insulin-like growth factor-binding protein 3 OS=Bos taurus GN=IGFBP3 PE=1 SV=3
	tr|Q08E54|Q08E54_BOVIN	Amyloid beta (A4) protein OS=Bos taurus GN=APP PE=2 SV=1
	sp|P86435|VGF_BOVIN	Neurosecretory protein VGF OS=Bos taurus GN=VGF PE=1 SV=2
	sp|O18739|CTGF_BOVIN	Connective tissue growth factor OS=Bos taurus GN=CTGF PE=2 SV=2
	tr|F1MZ58|F1MZ58_BOVIN	Low-density lipoprotein receptor OS=Bos taurus GN=LDLR PE=4 SV=2
	sp|A6QLN9|VWA1_BOVIN	von Willebrand factor A domain-containing protein 1 OS=Bos taurus PE=2 SV=1
	tr|Q3ZC35|Q3ZC35_BOVIN	Cysteine-rich, angiogenic inducer, 61 OS=Bos taurus GN=CYR61 PE=2 SV=1
	sp|A7MB70|SEM3C_BOVIN	Semaphorin-3C OS=Bos taurus GN=SEMA3C PE=2 SV=1
	sp|Q8MJ24|LOXL4_BOVIN	Lysyl oxidase homolog 4 OS=Bos taurus GN=LOXL4 PE=2 SV=1
	sp|Q769I5|MET_BOVIN	Hepatocyte growth factor receptor OS=Bos taurus GN=MET PE=2 SV=1
	sp|A5PK39|TPP2_BOVIN	Tripeptidyl-peptidase 2 OS=Bos taurus GN=TPP2 PE=2 SV=1
	sp|A0JNL5|LY66C_BOVIN	Lymphocyte antigen 6 complex locus protein G6c OS=Bos taurus GN=LY6G6C PE=2 SV=1
	tr|F1MM34|F1MM34_BOVIN	Catenin alpha-1 OS=Bos taurus GN=CTNNA1 PE=4 SV=2
	tr|F1N3H1|F1N3H1_BOVIN	Calumenin OS=Bos taurus GN=CALU PE=4 SV=1
	tr|F1MHN8|F1MHN8_BOVIN	CD166 antigen OS=Bos taurus GN=ALCAM PE=4 SV=2
	sp|P53712|ITB1_BOVIN	Integrin beta-1 OS=Bos taurus GN=ITGB1 PE=1 SV=3
	sp|Q3MI05|PPGB_BOVIN	Lysosomal protective protein OS=Bos taurus GN=CTSA PE=2 SV=1
	tr|Q1RMM9|Q1RMM9_BOVIN	Alpha-N-acetylgalactosaminidase OS=Bos taurus GN=NAGA PE=2 SV=1
	tr|A6H7H6|A6H7H6_BOVIN	CDH17 protein OS=Bos taurus GN=CDH17 PE=2 SV=1
	tr|Q2KJJ7|Q2KJJ7_BOVIN	Serine peptidase inhibitor, Kunitz type 1 OS=Bos taurus GN=SPINT1 PE=2 SV=1
	tr|A8E4L8|A8E4L8_BOVIN	LMO7 protein OS=Bos taurus GN=LMO7 PE=2 SV=1
	tr|A7MB83|A7MB83_BOVIN	PLOD2 protein OS=Bos taurus GN=PLOD2 PE=2 SV=1
	tr|E1BKS1|E1BKS1_BOVIN	Syndecan OS=Bos taurus GN=SDC4 PE=3 SV=1
	tr|E1B864|E1B864_BOVIN	Integrin beta OS=Bos taurus GN=ITGB4 PE=3 SV=2
	tr|A1A4Q6|A1A4Q6_BOVIN	Peptidase inhibitor 3, skin-derived (SKALP) OS=Bos taurus GN=PI3 PE=2 SV=1
	sp|Q58DW2|CGL_BOVIN	Cystathionine gamma-lyase OS=Bos taurus GN=CTH PE=2 SV=1
	sp|P10881|LA_BOVIN	Lupus La protein homolog OS=Bos taurus GN=SSB PE=2 SV=2
	sp|P56541|DNS2A_BOVIN	Deoxyribonuclease-2-alpha OS=Bos taurus GN=DNASE2 PE=2 SV=2
	tr|F1MZV1|F1MZV1_BOVIN	Hexokinase-1 OS=Bos taurus GN=HK1 PE=2 SV=2
	tr|Q3ZC44|Q3ZC44_BOVIN	Heterogeneous nuclear ribonucleoprotein A/B OS=Bos taurus GN=HNRNPAB PE=2 SV=1
	sp|Q08DA1|AT1A1_BOVIN	Sodium/potassium-transporting ATPase subunit alpha-1 OS=Bos taurus GN=ATP1A1 PE=2 SV=1
	sp|A6QR11|NELL2_BOVIN	Protein kinase C-binding protein NELL2 OS=Bos taurus GN=NELL2 PE=2 SV=1
	tr|Q0VCZ4|Q0VCZ4_BOVIN	Kallikrein-related peptidase 10 OS=Bos taurus GN=KLK10 PE=2 SV=1
	sp|A5D7R1|TR11B_BOVIN	Tumor necrosis factor receptor superfamily member 11B OS=Bos taurus GN=TNFRSF11B PE=2 SV=1
	sp|Q0VCY7|SRSF1_BOVIN	Serine/arginine-rich splicing factor 1 OS=Bos taurus GN=SRSF1 PE=2 SV=1
	sp|Q29423|CD44_BOVIN	CD44 antigen OS=Bos taurus GN=CD44 PE=2 SV=1
	tr|H7BWW2|H7BWW2_BOVIN	Beta-hexosaminidase OS=Bos taurus GN=HEXB PE=3 SV=1
	sp|A5PJN2|ERO1A_BOVIN	ERO1-like protein alpha OS=Bos taurus GN=ERO1L PE=2 SV=1
	sp|F1MMS9|ITA3_BOVIN	Integrin alpha-3 OS=Bos taurus GN=ITGA3 PE=3 SV=1
	sp|Q27956|LIF_BOVIN	Leukemia inhibitory factor OS=Bos taurus GN=LIF PE=2 SV=1
	sp|Q865V6|CAPG_BOVIN	Macrophage-capping protein OS=Bos taurus GN=CAPG PE=2 SV=1
	sp|Q9TTK8|KCRU_BOVIN	Creatine kinase U-type, mitochondrial OS=Bos taurus GN=CKMT1 PE=2 SV=1
	sp|Q9XT56|JAM1_BOVIN	Junctional adhesion molecule A OS=Bos taurus GN=F11R PE=2 SV=1
	sp|Q05588|UPAR_BOVIN	Urokinase plasminogen activator surface receptor OS=Bos taurus GN=PLAUR PE=2 SV=1
	sp|P81134|RENR_BOVIN	Renin receptor OS=Bos taurus GN=ATP6AP2 PE=1 SV=2
	sp|A6QQ07|BTD_BOVIN	Biotinidase OS=Bos taurus GN=BTD PE=2 SV=1
	sp|P62248|CS010_BOVIN	UPF0556 protein C19orf10 homolog OS=Bos taurus PE=2 SV=1
	sp|P15691|VEGFA_BOVIN	Vascular endothelial growth factor A OS=Bos taurus GN=VEGFA PE=1 SV=1
	sp|A5PKI3|FAM3C_BOVIN	Protein FAM3C OS=Bos taurus GN=FAM3C PE=2 SV=1
	sp|Q3ZCH0|GRP75_BOVIN	Stress-70 protein, mitochondrial OS=Bos taurus GN=HSPA9 PE=2 SV=1
	sp|P12344|AATM_BOVIN	Aspartate aminotransferase, mitochondrial OS=Bos taurus GN=GOT2 PE=1 SV=2
	sp|Q9MZ06|FGFP1_BOVIN	Fibroblast growth factor-binding protein 1 OS=Bos taurus GN=FGFBP1 PE=1 SV=1
	sp|Q9GLE5|MMP2_BOVIN	72 kDa type IV collagenase OS=Bos taurus GN=MMP2 PE=2 SV=1
	sp|O02751|CFDP2_BOVIN	Craniofacial development protein 2 OS=Bos taurus GN=CFDP2 PE=1 SV=2
	sp|Q2KHU0|SERB_BOVIN	Phosphoserine phosphatase OS=Bos taurus GN=PSPH PE=2 SV=1
	sp|Q2KIY5|PLBL2_BOVIN	Putative phospholipase B-like 2 OS=Bos taurus GN=PLBD2 PE=2 SV=1
	sp|Q0IIH7|ST14_BOVIN	Suppressor of tumorigenicity 14 protein homolog OS=Bos taurus GN=ST14 PE=2 SV=1
	tr|F1MLW0|F1MLW0_BOVIN	Non-muscle caldesmon OS=Bos taurus GN=CALD1 PE=4 SV=2
	sp|Q32LC7|G3BP1_BOVIN	Ras GTPase-activating protein-binding protein 1 OS=Bos taurus GN=G3BP PE=2 SV=1
	tr|A2VDN8|A2VDN8_BOVIN	Coronin OS=Bos taurus GN=CORO1C PE=2 SV=1
	sp|P81623|ERP29_BOVIN	Endoplasmic reticulum resident protein 29 OS=Bos taurus GN=ERP29 PE=1 SV=2
	sp|Q3ZBW4|PCNA_BOVIN	Proliferating cell nuclear antigen OS=Bos taurus GN=PCNA PE=2 SV=1
	tr|Q3MHK9|Q3MHK9_BOVIN	Fascin OS=Bos taurus GN=FSCN1 PE=2 SV=1
	tr|E1BBP4|E1BBP4_BOVIN	Tyrosine-protein kinase receptor OS=Bos taurus GN=DDR1 PE=2 SV=2
	sp|Q3MHR5|SRSF2_BOVIN	Serine/arginine-rich splicing factor 2 OS=Bos taurus GN=SRSF2 PE=2 SV=3
	sp|Q1LZB9|FSTL3_BOVIN	Follistatin-related protein 3 OS=Bos taurus GN=FSTL3 PE=2 SV=1
	sp|O77783|EXT2_BOVIN	Exostosin-2 OS=Bos taurus GN=EXT2 PE=1 SV=1
	sp|Q7YQE1|GCNT3_BOVIN	Beta-1,3-galactosyl-O-glycosyl-glycoprotein beta-1,6-N-acetylglucosaminyltransferase 3 OS=Bos taurus GN=GCNT3 PE=1 SV=1
	sp|P02754|LACB_BOVIN	Beta-lactoglobulin OS=Bos taurus GN=LGB PE=1 SV=3
	sp|Q8SPJ1|PLAK_BOVIN	Junction plakoglobin OS=Bos taurus GN=JUP PE=2 SV=1
	sp|Q24K02|IDE_BOVIN	Insulin-degrading enzyme OS=Bos taurus GN=IDE PE=2 SV=1
	tr|A7MB07|A7MB07_BOVIN	ADAMTS1 protein OS=Bos taurus GN=ADAMTS1 PE=2 SV=1
	sp|P08166|KAD2_BOVIN	Adenylate kinase 2, mitochondrial OS=Bos taurus GN=AK2 PE=1 SV=2
	sp|Q2KI95|FHL2_BOVIN	Four and a half LIM domains protein 2 OS=Bos taurus GN=FHL2 PE=2 SV=1
	sp|Q3SZ57|FETA_BOVIN	Alpha-fetoprotein OS=Bos taurus GN=AFP PE=2 SV=1
	tr|F1MU08|F1MU08_BOVIN	Poly [ADP-ribose] polymerase 1 OS=Bos taurus GN=PARP1 PE=4 SV=2
	sp|Q28046|ADSV_BOVIN	Adseverin OS=Bos taurus GN=SCIN PE=1 SV=1
	tr|A3KMY8|A3KMY8_BOVIN	GUSB protein OS=Bos taurus GN=GUSB PE=2 SV=1
	sp|P05689|CATZ_BOVIN	Cathepsin Z OS=Bos taurus GN=CTSZ PE=2 SV=2
	sp|P38573|UPK1B_BOVIN	Uroplakin-1b OS=Bos taurus GN=UPK1B PE=1 SV=4
	sp|A5D7I4|EXT1_BOVIN	Exostosin-1 OS=Bos taurus GN=EXT1 PE=2 SV=1
	sp|Q3SYU6|CNN2_BOVIN	Calponin-2 OS=Bos taurus GN=CNN2 PE=2 SV=3
	tr|A6QLR1|A6QLR1_BOVIN	Poliovirus receptor-related 4 OS=Bos taurus GN=PVRL4 PE=2 SV=1
	sp|Q08E38|PRP19_BOVIN	Pre-mRNA-processing factor 19 OS=Bos taurus GN=PRPF19 PE=2 SV=1
	sp|Q17QB3|ASAH1_BOVIN	Acid ceramidase OS=Bos taurus GN=ASAH1 PE=2 SV=3
	tr|Q3SYV6|Q3SYV6_BOVIN	Importin subunit alpha OS=Bos taurus GN=KPNA2 PE=2 SV=1
	sp|Q32L50|SBSPO_BOVIN	Somatomedin-B and thrombospondin type-1 domain-containing protein OS=Bos taurus GN=SBSPON PE=2 SV=2
	tr|F1N1G1|F1N1G1_BOVIN	Heparanase OS=Bos taurus GN=HPSE PE=4 SV=2
	sp|Q32L92|CNN3_BOVIN	Calponin-3 OS=Bos taurus GN=CNN3 PE=2 SV=1
	tr|A6H7D7|A6H7D7_BOVIN	BZW2 protein OS=Bos taurus GN=BZW2 PE=2 SV=1
	sp|Q5E9F8|H33_BOVIN	Histone H3.3 OS=Bos taurus GN=H3F3A PE=1 SV=3
	sp|P62803|H4_BOVIN	Histone H4 OS=Bos taurus PE=1 SV=2
	sp|Q9TS87|TAGL_BOVIN	Transgelin OS=Bos taurus GN=TAGLN PE=1 SV=4
	tr|Q0III8|Q0III8_BOVIN	RNASET2 protein (Fragment) OS=Bos taurus GN=RNASET2 PE=2 SV=1
	sp|P00829|ATPB_BOVIN	ATP synthase subunit beta, mitochondrial OS=Bos taurus GN=ATP5B PE=1 SV=2
	tr|A6QL85|A6QL85_BOVIN	RCC2 protein OS=Bos taurus GN=RCC2 PE=2 SV=1
	sp|Q1LZH9|GNS_BOVIN	N-acetylglucosamine-6-sulfatase OS=Bos taurus GN=GNS PE=2 SV=1
	sp|Q29451|MA2B1_BOVIN	Lysosomal alpha-mannosidase OS=Bos taurus GN=MAN2B1 PE=1 SV=4
	tr|A6QP36|A6QP36_BOVIN	LMAN2 protein OS=Bos taurus GN=LMAN2 PE=2 SV=1
	tr|Q17QC7|Q17QC7_BOVIN	Poliovirus receptor-related 2 (Herpesvirus entry mediator B) OS=Bos taurus GN=PVRL2 PE=2 SV=1
	tr|Q3SX47|Q3SX47_BOVIN	Heterogeneous nuclear ribonucleoprotein C (C1/C2) OS=Bos taurus GN=HNRPC PE=2 SV=1
	sp|Q3SWZ6|SBDS_BOVIN	Ribosome maturation protein SBDS OS=Bos taurus GN=SBDS PE=2 SV=1
	tr|A6QL81|A6QL81_BOVIN	DKK3 protein OS=Bos taurus GN=DKK3 PE=2 SV=1
	tr|F1MF86|F1MF86_BOVIN	Latent-transforming growth factor beta-binding protein 2 OS=Bos taurus GN=LTBP2 PE=4 SV=1
	sp|Q2KIM0|FUCO_BOVIN	Tissue alpha-L-fucosidase OS=Bos taurus GN=FUCA1 PE=2 SV=1
	tr|A5D7L1|A5D7L1_BOVIN	CLEC11A protein OS=Bos taurus GN=CLEC11A PE=2 SV=1
	sp|Q1LZB6|CAPR1_BOVIN	Caprin-1 OS=Bos taurus GN=CAPRIN1 PE=2 SV=1
	sp|Q3B7L6|SRSF6_BOVIN	Serine/arginine-rich splicing factor 6 OS=Bos taurus GN=SRSF6 PE=2 SV=1
	sp|Q3T0I4|THOC4_BOVIN	THO complex subunit 4 OS=Bos taurus GN=ALYREF PE=2 SV=1
	sp|Q3T106|SRSF7_BOVIN	Serine/arginine-rich splicing factor 7 OS=Bos taurus GN=SRSF7 PE=2 SV=1
	sp|P79105|S10AC_BOVIN	Protein S100-A12 OS=Bos taurus GN=S100A12 PE=1 SV=3
	sp|Q29RT9|CXL16_BOVIN	C-X-C motif chemokine 16 OS=Bos taurus GN=CXCL16 PE=2 SV=1
	sp|Q2KIT5|CREL2_BOVIN	Cysteine-rich with EGF-like domain protein 2 OS=Bos taurus GN=CRELD2 PE=2 SV=1
	sp|Q3T0C8|PDLI2_BOVIN	PDZ and LIM domain protein 2 OS=Bos taurus GN=PDLIM2 PE=2 SV=1
	tr|A4IFS7|A4IFS7_BOVIN	CTSL1 protein OS=Bos taurus GN=CTSL1 PE=2 SV=1
	sp|Q9TU47|IF6_BOVIN	Eukaryotic translation initiation factor 6 OS=Bos taurus GN=EIF6 PE=2 SV=2
	sp|P23356|UCHL1_BOVIN	Ubiquitin carboxyl-terminal hydrolase isozyme L1 OS=Bos taurus GN=UCHL1 PE=1 SV=2
	sp|Q2T9P4|NASP_BOVIN	Nuclear autoantigenic sperm protein OS=Bos taurus GN=NASP PE=2 SV=2
	tr|B5UBG1|B5UBG1_BOVIN	Calcitonin OS=Bos taurus GN=CT PE=2 SV=1
	tr|F1MMR6|F1MMR6_BOVIN	Cathepsin D OS=Bos taurus GN=CTSD PE=2 SV=1
	sp|P61603|CH10_BOVIN	10 kDa heat shock protein, mitochondrial OS=Bos taurus GN=HSPE1 PE=3 SV=2
	sp|P30931|TF_BOVIN	Tissue factor OS=Bos taurus GN=F3 PE=1 SV=1
	sp|Q3T0B6|C1QBP_BOVIN	Complement component 1 Q subcomponent-binding protein, mitochondrial OS=Bos taurus GN=C1QBP PE=2 SV=1
	tr|A4FV12|A4FV12_BOVIN	UBA2 protein OS=Bos taurus GN=UBA2 PE=2 SV=1
	sp|O19131|TNR1A_BOVIN	Tumor necrosis factor receptor superfamily member 1A OS=Bos taurus GN=TNFRSF1A PE=2 SV=1
	sp|Q3T0Z8|RUXF_BOVIN	Small nuclear ribonucleoprotein F OS=Bos taurus GN=SNRPF PE=3 SV=2
	sp|A0JN52|SF3B3_BOVIN	Splicing factor 3B subunit 3 OS=Bos taurus GN=SF3B3 PE=2 SV=1
	tr|Q3T0U5|Q3T0U5_BOVIN	Chromatin modifying protein 2A OS=Bos taurus GN=CHMP2A PE=2 SV=1
	REVERSE_tr|E1BQ37|E1BQ37_BOVIN-R	Uncharacterized protein OS=Bos taurus GN=SFPQ PE=4 SV=1
	sp|Q0V8B6|TPP1_BOVIN	Tripeptidyl-peptidase 1 OS=Bos taurus GN=TPP1 PE=2 SV=1
	sp|Q58D55|BGAL_BOVIN	Beta-galactosidase OS=Bos taurus GN=GLB1 PE=2 SV=1
	sp|Q95M12|LGMN_BOVIN	Legumain OS=Bos taurus GN=LGMN PE=1 SV=1
	tr|A1L570|A1L570_BOVIN	Ephrin-B1 OS=Bos taurus GN=EFNB1 PE=2 SV=1
	sp|Q2HJ74|GATM_BOVIN	Glycine amidinotransferase, mitochondrial OS=Bos taurus GN=GATM PE=2 SV=1
	tr|A7MB21|A7MB21_BOVIN	FERMT2 protein OS=Bos taurus GN=FERMT2 PE=2 SV=1
	sp|Q1JQB5|FBLI1_BOVIN	Filamin-binding LIM protein 1 OS=Bos taurus GN=FBLIM1 PE=2 SV=1
	sp|Q95323|CAH4_BOVIN	Carbonic anhydrase 4 OS=Bos taurus GN=CA4 PE=2 SV=1
	tr|A7Z025|A7Z025_BOVIN	PRPF8 protein OS=Bos taurus GN=PRPF8 PE=2 SV=1
	sp|Q3ZBG9|PLS2_BOVIN	Phospholipid scramblase 2 OS=Bos taurus GN=PLSCR2 PE=2 SV=1
	sp|P79134|ANXA6_BOVIN	Annexin A6 OS=Bos taurus GN=ANXA6 PE=1 SV=2
	tr|A6QM01|A6QM01_BOVIN	NAGLU protein OS=Bos taurus GN=NAGLU PE=2 SV=1
	sp|P14769|GGTA1_BOVIN	N-acetyllactosaminide alpha-1,3-galactosyltransferase OS=Bos taurus GN=GGTA1 PE=1 SV=1
	sp|Q05716|IBP4_BOVIN	Insulin-like growth factor-binding protein 4 OS=Bos taurus GN=IGFBP4 PE=2 SV=1
	sp|Q3SWX5|CADH6_BOVIN	Cadherin-6 OS=Bos taurus GN=CDH6 PE=2 SV=1
	sp|P53710|ITA2_BOVIN	Integrin alpha-2 (Fragment) OS=Bos taurus GN=ITGA2 PE=2 SV=1
	tr|A5PKL2|A5PKL2_BOVIN	RRAS2 protein OS=Bos taurus GN=RRAS2 PE=2 SV=1
	tr|F1N3A1|F1N3A1_BOVIN	Thrombospondin-1 OS=Bos taurus GN=THBS1 PE=4 SV=1
	tr|F1N206|F1N206_BOVIN	Dihydrolipoyl dehydrogenase OS=Bos taurus GN=DLD PE=3 SV=2
	tr|Q3ZBX0|Q3ZBX0_BOVIN	Basigin OS=Bos taurus GN=BSG PE=2 SV=1
	sp|P27674|GTR1_BOVIN	Solute carrier family 2, facilitated glucose transporter member 1 OS=Bos taurus GN=SLC2A1 PE=2 SV=1
	sp|Q17QN3|RSMN_BOVIN	Small nuclear ribonucleoprotein-associated protein N OS=Bos taurus GN=SNRPN PE=2 SV=1
	tr|Q1RMT6|Q1RMT6_BOVIN	Drebrin 1 OS=Bos taurus GN=DBN1 PE=2 SV=1
	sp|Q3ZC10|SMD1_BOVIN	Small nuclear ribonucleoprotein Sm D1 OS=Bos taurus GN=SNRPD1 PE=3 SV=1
	sp|Q58CS8|GNPTG_BOVIN	N-acetylglucosamine-1-phosphotransferase subunit gamma OS=Bos taurus GN=GNPTG PE=1 SV=4
	tr|A0JN47|A0JN47_BOVIN	Plexin domain containing 2 OS=Bos taurus GN=PLXDC2 PE=2 SV=1
	tr|A2VDR3|A2VDR3_BOVIN	Cerebellin 4 OS=Bos taurus GN=CBLN4 PE=2 SV=1
	sp|Q1RMR2|RU17_BOVIN	U1 small nuclear ribonucleoprotein 70 kDa OS=Bos taurus GN=SNRNP70 PE=2 SV=1
	tr|Q2TBX1|Q2TBX1_BOVIN	Cytokine induced protein 29 kDa OS=Bos taurus GN=CIP29 PE=2 SV=1
	REVERSE_tr|Q0VC27|Q0VC27_BOVIN-R	High mobility group AT-hook 1 OS=Bos taurus GN=HMGA1 PE=2 SV=1
	sp|P10731|AMD_BOVIN	Peptidyl-glycine alpha-amidating monooxygenase OS=Bos taurus GN=PAM PE=1 SV=2
	sp|P79255|IL8_BOVIN	Interleukin-8 OS=Bos taurus GN=IL8 PE=3 SV=1
	tr|Q3ZCM0|Q3ZCM0_BOVIN	Lymphocyte-specific protein tyrosine kinase OS=Bos taurus GN=LCK PE=2 SV=1
	sp|P16116|ALDR_BOVIN	Aldose reductase OS=Bos taurus GN=AKR1B1 PE=1 SV=1
	sp|Q28105|EPCR_BOVIN	Endothelial protein C receptor OS=Bos taurus GN=PROCR PE=2 SV=1
	tr|Q3ZBU0|Q3ZBU0_BOVIN	PDZ and LIM domain 5 OS=Bos taurus GN=PDLIM5 PE=2 SV=1
	tr|Q2NKU1|Q2NKU1_BOVIN	Deoxyuridine triphosphatase OS=Bos taurus GN=DUT PE=2 SV=1
	sp|Q08DM8|TSN_BOVIN	Translin OS=Bos taurus GN=TSN PE=2 SV=1
	sp|Q3SYX0|NDRG1_BOVIN	Protein NDRG1 OS=Bos taurus GN=NDRG1 PE=2 SV=1
	sp|P62894|CYC_BOVIN	Cytochrome c OS=Bos taurus GN=CYCS PE=1 SV=2
	tr|G3N0D8|G3N0D8_BOVIN	Claudin OS=Bos taurus GN=CLDN6 PE=3 SV=1
	tr|F1MAU3|F1MAU3_BOVIN	Gamma-interferon-inducible lysosomal thiol reductase OS=Bos taurus GN=IFI30 PE=4 SV=2
	tr|F1MZF2|F1MZF2_BOVIN	Desmocollin-2 OS=Bos taurus GN=DSC2 PE=3 SV=2
	sp|Q3SZF8|SMD2_BOVIN	Small nuclear ribonucleoprotein Sm D2 OS=Bos taurus GN=SNRPD2 PE=3 SV=1
	tr|F6QZF5|F6QZF5_BOVIN	Granzyme A OS=Bos taurus GN=GZMA PE=4 SV=1
	sp|P00732|CBPB1_BOVIN	Carboxypeptidase B OS=Bos taurus GN=CPB1 PE=1 SV=2
	sp|P10152|ANG1_BOVIN	Angiogenin-1 OS=Bos taurus GN=ANG1 PE=1 SV=4
	sp|Q29444|MANBA_BOVIN	Beta-mannosidase OS=Bos taurus GN=MANBA PE=1 SV=1
	sp|Q28009|FUS_BOVIN	RNA-binding protein FUS OS=Bos taurus GN=FUS PE=2 SV=2
	sp|P00366|DHE3_BOVIN	Glutamate dehydrogenase 1, mitochondrial OS=Bos taurus GN=GLUD1 PE=1 SV=2
	sp|Q29RK1|CISY_BOVIN	Citrate synthase, mitochondrial OS=Bos taurus GN=CS PE=1 SV=1
	tr|Q3ZCE2|Q3ZCE2_BOVIN	ELAV (Embryonic lethal, abnormal vision, Drosophila)-like 1 (Hu antigen R) OS=Bos taurus GN=ELAVL1 PE=2 SV=1
	sp|Q3T0L5|EPCAM_BOVIN	Epithelial cell adhesion molecule OS=Bos taurus GN=EPCAM PE=2 SV=1
	tr|Q0VD44|Q0VD44_BOVIN	Twisted gastrulation homolog 1 (Drosophila) OS=Bos taurus GN=TWSG1 PE=2 SV=1
	sp|P01096|ATIF1_BOVIN	ATPase inhibitor, mitochondrial OS=Bos taurus GN=ATPIF1 PE=1 SV=2
	sp|Q0X0C4|HEXI1_BOVIN	Protein HEXIM1 OS=Bos taurus GN=HEXIM1 PE=2 SV=1
	sp|Q3ZBL0|RUXG_BOVIN	Small nuclear ribonucleoprotein G OS=Bos taurus GN=SNRPG PE=3 SV=1
	sp|Q28021|ROCK2_BOVIN	Rho-associated protein kinase 2 OS=Bos taurus GN=ROCK2 PE=1 SV=1
	tr|E1BKZ5|E1BKZ5_BOVIN	Uncharacterized protein OS=Bos taurus GN=GOLGB1 PE=2 SV=2
	tr|Q2KJ17|Q2KJ17_BOVIN	GTPase activating protein (SH3 domain) binding protein 2 OS=Bos taurus GN=G3BP2 PE=2 SV=1
	sp|Q0VCG9|PTX3_BOVIN	Pentraxin-related protein PTX3 OS=Bos taurus GN=PTX3 PE=2 SV=1
	sp|Q8WMV3|CXAR_BOVIN	Coxsackievirus and adenovirus receptor homolog OS=Bos taurus GN=CXADR PE=2 SV=1
	tr|F1MM24|F1MM24_BOVIN	Uncharacterized protein OS=Bos taurus GN=SLC38A4 PE=4 SV=1
	sp|A4FV08|GNPI1_BOVIN	Glucosamine-6-phosphate isomerase 1 OS=Bos taurus GN=GNPDA1 PE=2 SV=1
	sp|Q5PXY7|RABP2_BOVIN	Cellular retinoic acid-binding protein 2 OS=Bos taurus GN=CRABP2 PE=2 SV=3
	sp|A4FUI2|RUXE_BOVIN	Small nuclear ribonucleoprotein E OS=Bos taurus GN=SNRPE PE=3 SV=1
	sp|Q08E11|PPIC_BOVIN	Peptidyl-prolyl cis-trans isomerase C OS=Bos taurus GN=PPIC PE=2 SV=1
	sp|Q32KV6|SIL1_BOVIN	Nucleotide exchange factor SIL1 OS=Bos taurus GN=SIL1 PE=2 SV=1
	sp|Q1LZ95|IDI1_BOVIN	Isopentenyl-diphosphate Delta-isomerase 1 OS=Bos taurus GN=IDI1 PE=2 SV=2
	sp|Q3T186|RPIA_BOVIN	Ribose-5-phosphate isomerase (Fragment) OS=Bos taurus GN=RPIA PE=2 SV=2
	tr|A6QLZ3|A6QLZ3_BOVIN	ARSB protein OS=Bos taurus GN=ARSB PE=2 SV=1
	tr|Q24JZ8|Q24JZ8_BOVIN	U2 small nuclear RNA auxiliary factor 2 OS=Bos taurus GN=U2AF2 PE=2 SV=1
	sp|Q2HJG2|PUF60_BOVIN	Poly(U)-binding-splicing factor PUF60 OS=Bos taurus GN=PUF60 PE=2 SV=1
	sp|Q3SYW1|AP1M2_BOVIN	AP-1 complex subunit mu-2 OS=Bos taurus GN=AP1M2 PE=1 SV=3
	sp|Q1ZYR0|CLN5_BOVIN	Ceroid-lipofuscinosis neuronal protein 5 OS=Bos taurus GN=CLN5 PE=2 SV=1
	sp|P79121|TIMP3_BOVIN	Metalloproteinase inhibitor 3 OS=Bos taurus GN=TIMP3 PE=2 SV=1
	sp|Q3MHL3|RBBP4_BOVIN	Histone-binding protein RBBP4 OS=Bos taurus GN=RBBP4 PE=1 SV=3
	sp|Q32PF3|PCNP_BOVIN	PEST proteolytic signal-containing nuclear protein OS=Bos taurus GN=PCNP PE=2 SV=1
	tr|Q1RMW0|Q1RMW0_BOVIN	Phospholipid scramblase 3 OS=Bos taurus GN=PLSCR3 PE=2 SV=1
	sp|P48452|PP2BA_BOVIN	Serine/threonine-protein phosphatase 2B catalytic subunit alpha isoform OS=Bos taurus GN=PPP3CA PE=1 SV=1
	sp|Q0VCA3|LETM1_BOVIN	LETM1 and EF-hand domain-containing protein 1, mitochondrial OS=Bos taurus GN=LETM1 PE=2 SV=1
	sp|P00792|PEPA_BOVIN	Pepsin A OS=Bos taurus GN=PGA PE=1 SV=2
	sp|P80221|CXCL6_BOVIN	C-X-C motif chemokine 6 OS=Bos taurus GN=CXCL6 PE=1 SV=2
	sp|Q28120|QPCT_BOVIN	Glutaminyl-peptide cyclotransferase OS=Bos taurus GN=QPCT PE=1 SV=1
	sp|Q2TBX4|HSP13_BOVIN	Heat shock 70 kDa protein 13 OS=Bos taurus GN=HSPA13 PE=2 SV=1
	sp|Q95122|CD14_BOVIN	Monocyte differentiation antigen CD14 OS=Bos taurus GN=CD14 PE=2 SV=2
	tr|Q3MHI9|Q3MHI9_BOVIN	Tumor necrosis factor receptor superfamily, member 1B OS=Bos taurus GN=TNFRSF1B PE=2 SV=1
	sp|Q5E994|CHM1B_BOVIN	Charged multivesicular body protein 1b OS=Bos taurus GN=CHMP1B PE=2 SV=1
	tr|Q0IIG0|Q0IIG0_BOVIN	Nucleolar and coiled-body phosphoprotein 1 OS=Bos taurus GN=NOLC1 PE=2 SV=1
	tr|E1BDI4|E1BDI4_BOVIN	Uncharacterized protein OS=Bos taurus GN=FANCI PE=4 SV=2
	tr|F1MNS0|F1MNS0_BOVIN	Uncharacterized protein OS=Bos taurus GN=HERC1 PE=2 SV=2
	sp|A2VDL8|SC23A_BOVIN	Protein transport protein Sec23A OS=Bos taurus GN=SEC23A PE=2 SV=1
	tr|A2VDM7|A2VDM7_BOVIN	Splicing factor 1 OS=Bos taurus GN=SF1 PE=2 SV=1
	sp|Q0VCU8|EIF3J_BOVIN	Eukaryotic translation initiation factor 3 subunit J OS=Bos taurus GN=EIF3J PE=2 SV=1
	sp|Q3T083|SDF2L_BOVIN	Stromal cell-derived factor 2-like protein 1 OS=Bos taurus GN=SDF2L1 PE=2 SV=1
	sp|Q5E9C0|RSU1_BOVIN	Ras suppressor protein 1 OS=Bos taurus GN=RSU1 PE=2 SV=1
	sp|A5PJN8|SF3A2_BOVIN	Splicing factor 3A subunit 2 OS=Bos taurus GN=SF3A2 PE=2 SV=1
	sp|Q0P5F3|LIN7C_BOVIN	Protein lin-7 homolog C OS=Bos taurus GN=LIN7C PE=2 SV=1
	tr|F1MD63|F1MD63_BOVIN	Uncharacterized protein (Fragment) OS=Bos taurus GN=DIXDC1 PE=4 SV=1
	sp|A6H7H1|F120A_BOVIN	Constitutive coactivator of PPAR-gamma-like protein 1 OS=Bos taurus GN=FAM120A PE=2 SV=1
	sp|P10790|FABPH_BOVIN	Fatty acid-binding protein, heart OS=Bos taurus GN=FABP3 PE=1 SV=2
	sp|Q3ZBA6|DJB11_BOVIN	DnaJ homolog subfamily B member 11 OS=Bos taurus GN=DNAJB11 PE=2 SV=1
	sp|P08169|MPRI_BOVIN	Cation-independent mannose-6-phosphate receptor OS=Bos taurus GN=IGF2R PE=1 SV=2
	sp|A5D7H3|CTL2_BOVIN	Choline transporter-like protein 2 OS=Bos taurus GN=SLC44A2 PE=2 SV=1
	sp|A6QLD2|OLM2B_BOVIN	Olfactomedin-like protein 2B OS=Bos taurus GN=OLFML2B PE=2 SV=1
	sp|P21214|TGFB2_BOVIN	Transforming growth factor beta-2 OS=Bos taurus GN=TGFB2 PE=1 SV=3
	sp|Q10741|ADA10_BOVIN	Disintegrin and metalloproteinase domain-containing protein 10 OS=Bos taurus GN=ADAM10 PE=1 SV=1
	tr|E1BPI3|E1BPI3_BOVIN	Uncharacterized protein OS=Bos taurus GN=FRK PE=4 SV=1
	tr|F1MT97|F1MT97_BOVIN	Interstitial collagenase OS=Bos taurus GN=MMP1 PE=4 SV=2
	tr|Q0P5B0|Q0P5B0_BOVIN	Arrestin domain containing 1 OS=Bos taurus GN=ARRDC1 PE=2 SV=1
	tr|F1MYE4|F1MYE4_BOVIN	Chondroadherin OS=Bos taurus GN=CHAD PE=2 SV=2
	tr|Q0VCU3|Q0VCU3_BOVIN	Cathepsin F OS=Bos taurus GN=CTSF PE=2 SV=1
	sp|P10279|PRIO_BOVIN	Major prion protein OS=Bos taurus GN=PRNP PE=1 SV=2
	sp|Q2KIR1|SNRPA_BOVIN	U1 small nuclear ribonucleoprotein A OS=Bos taurus GN=SNRPA PE=2 SV=1
	REVERSE_sp|P10103|HMGB1_BOVIN-R	High mobility group protein B1 OS=Bos taurus GN=HMGB1 PE=1 SV=3
	sp|Q14532|K1H2_HUMAN	Keratin, type I cuticular Ha2 OS=Homo sapiens GN=KRT32 PE=1 SV=3
	tr|F1MHG0|F1MHG0_BOVIN	Uncharacterized protein (Fragment) OS=Bos taurus GN=MYO7A PE=4 SV=2
	tr|E1BMN9|E1BMN9_BOVIN	Uncharacterized protein OS=Bos taurus GN=BSN PE=4 SV=2
	tr|M0QVY0|M0QVY0_BOVIN	Uncharacterized protein OS=Bos taurus GN=KRT6A PE=3 SV=1
	sp|A1L595|K1C17_BOVIN	Keratin, type I cytoskeletal 17 OS=Bos taurus GN=KRT17 PE=2 SV=1
	sp|Q8MJG1|PSIP1_BOVIN	PC4 and SFRS1-interacting protein OS=Bos taurus GN=PSIP1 PE=2 SV=2
	sp|P80209|CATD_BOVIN	Cathepsin D OS=Bos taurus GN=CTSD PE=1 SV=2
	sp|Q0P5D2|CPSF6_BOVIN	Cleavage and polyadenylation specificity factor subunit 6 OS=Bos taurus GN=CPSF6 PE=2 SV=1
	tr|Q3T0F9|Q3T0F9_BOVIN	Growth factor receptor-bound protein 2 OS=Bos taurus GN=GRB2 PE=2 SV=1
	sp|O02741|ISG15_BOVIN	Ubiquitin-like protein ISG15 OS=Bos taurus GN=ISG15 PE=2 SV=3
	tr|F1MV85|F1MV85_BOVIN	Uncharacterized protein OS=Bos taurus GN=PBDC1 PE=4 SV=1
	tr|E1BC32|E1BC32_BOVIN	Uncharacterized protein OS=Bos taurus PE=4 SV=2
	sp|Q3ZBH3|CD151_BOVIN	CD151 antigen OS=Bos taurus GN=CD151 PE=2 SV=1
	tr|F1MX60|F1MX60_BOVIN	Uncharacterized protein OS=Bos taurus GN=CYFIP2 PE=4 SV=2
	tr|G3MZX1|G3MZX1_BOVIN	Uncharacterized protein (Fragment) OS=Bos taurus GN=C6orf132 PE=4 SV=1
	tr|Q0VCZ7|Q0VCZ7_BOVIN	Ladinin 1 OS=Bos taurus GN=LAD1 PE=2 SV=1
	tr|Q2KJ47|Q2KJ47_BOVIN	EH-domain containing 2 OS=Bos taurus GN=EHD2 PE=2 SV=1
	tr|F1MC31|F1MC31_BOVIN	Uncharacterized protein OS=Bos taurus GN=SF3B2 PE=4 SV=1
	sp|Q17QC5|AP2S1_BOVIN	AP-2 complex subunit sigma OS=Bos taurus GN=AP2S1 PE=2 SV=1
	tr|F1MYN8|F1MYN8_BOVIN	Uncharacterized protein OS=Bos taurus GN=SON PE=4 SV=2
	tr|Q148J4|Q148J4_BOVIN	RAB2A, member RAS oncogene family OS=Bos taurus GN=RAB2A PE=2 SV=1
	sp|A6BMK7|NEUR1_BOVIN	Sialidase-1 OS=Bos taurus GN=NEU1 PE=2 SV=2
	sp|P07995|INHBA_BOVIN	Inhibin beta A chain OS=Bos taurus GN=INHBA PE=1 SV=2
	sp|Q3B7N0|CAD13_BOVIN	Cadherin-13 OS=Bos taurus GN=CDH13 PE=2 SV=1
	sp|Q3SX42|CHM2B_BOVIN	Charged multivesicular body protein 2b OS=Bos taurus GN=CHMP2B PE=2 SV=1
	sp|Q3ZC91|ASM3A_BOVIN	Acid sphingomyelinase-like phosphodiesterase 3a OS=Bos taurus GN=SMPDL3A PE=2 SV=1
	sp|A7YWG4|GGH_BOVIN	Gamma-glutamyl hydrolase OS=Bos taurus GN=GGH PE=2 SV=1
	sp|P80929|ANG2_BOVIN	Angiogenin-2 OS=Bos taurus GN=ANG2 PE=1 SV=1
	sp|Q2KHZ8|GLCM_BOVIN	Glucosylceramidase OS=Bos taurus GN=GBA PE=2 SV=1
	sp|A6QQ92|SERP3_BOVIN	Serpin E3 OS=Bos taurus GN=SERPINE3 PE=2 SV=1
	sp|P13605|FMOD_BOVIN	Fibromodulin OS=Bos taurus GN=FMOD PE=1 SV=2
	sp|Q95132|ICAM1_BOVIN	Intercellular adhesion molecule 1 OS=Bos taurus GN=ICAM1 PE=2 SV=1
	sp|Q28193|FURIN_BOVIN	Furin OS=Bos taurus GN=FURIN PE=1 SV=1
	tr|A7Z066|A7Z066_BOVIN	Canx protein OS=Bos taurus GN=canx PE=2 SV=1
	sp|Q0VD19|ASM_BOVIN	Sphingomyelin phosphodiesterase OS=Bos taurus GN=SMPD1 PE=2 SV=1
	sp|P41976|SODM_BOVIN	Superoxide dismutase [Mn], mitochondrial OS=Bos taurus GN=SOD2 PE=2 SV=1
	sp|Q0VCA0|FGF18_BOVIN	Fibroblast growth factor 18 OS=Bos taurus GN=FGF18 PE=2 SV=1
	sp|Q07537|GALT1_BOVIN	Polypeptide N-acetylgalactosaminyltransferase 1 OS=Bos taurus GN=GALNT1 PE=1 SV=1
	tr|A0JNE6|A0JNE6_BOVIN	Eukaryotic translation initiation factor 2-alpha kinase 2 OS=Bos taurus GN=EIF2AK2 PE=2 SV=1
	sp|Q3T0P7|ITM2B_BOVIN	Integral membrane protein 2B OS=Bos taurus GN=ITM2B PE=2 SV=1
	sp|Q3T0I2|CATH_BOVIN	Pro-cathepsin H OS=Bos taurus GN=CTSH PE=2 SV=1
	tr|G3MX46|G3MX46_BOVIN	Uncharacterized protein OS=Bos taurus GN=CIC PE=4 SV=1
	sp|Q5QQ49|XYLT2_BOVIN	Xylosyltransferase 2 OS=Bos taurus GN=XYLT2 PE=2 SV=1
	sp|Q08DK4|GHC1_BOVIN	Mitochondrial glutamate carrier 1 OS=Bos taurus GN=SLC25A22 PE=2 SV=1
	tr|A7YW22|A7YW22_BOVIN	JAM3 protein OS=Bos taurus GN=JAM3 PE=2 SV=1
	sp|O77656|MMP13_BOVIN	Collagenase 3 OS=Bos taurus GN=MMP13 PE=2 SV=1
	tr|E1BN99|E1BN99_BOVIN	Uncharacterized protein OS=Bos taurus GN=ADAMTS15 PE=3 SV=1
	tr|A4FV32|A4FV32_BOVIN	PLEKHB2 protein OS=Bos taurus GN=PLEKHB2 PE=2 SV=1
	tr|B1H0W5|B1H0W5_BOVIN	PDGFB protein OS=Bos taurus GN=PDGFB PE=2 SV=1
	REVERSE_tr|Q5E9I4|Q5E9I4_BOVIN-R	MGAT1 protein OS=Bos taurus GN=MGAT1 PE=2 SV=1
	tr|E1BGF1|E1BGF1_BOVIN	Uncharacterized protein OS=Bos taurus GN=KIAA0513 PE=4 SV=2
	tr|E1BJX9|E1BJX9_BOVIN	Uncharacterized protein OS=Bos taurus GN=CCDC138 PE=2 SV=2
	tr|E1BF55|E1BF55_BOVIN	Uncharacterized protein (Fragment) OS=Bos taurus GN=MAP7D2 PE=4 SV=2
	REVERSE_sp|A6H750|KIF2B_BOVIN-R	Kinesin-like protein KIF2B OS=Bos taurus GN=KIF2B PE=2 SV=1
	REVERSE_tr|F1MZ23|F1MZ23_BOVIN-R	Uncharacterized protein (Fragment) OS=Bos taurus GN=PARD3 PE=4 SV=2
	tr|F1MVZ8|F1MVZ8_BOVIN	Uncharacterized protein (Fragment) OS=Bos taurus GN=NGEF PE=4 SV=2
	sp|A7MAZ5|H13_BOVIN	Histone H1.3 OS=Bos taurus GN=HIST1H1D PE=1 SV=1
	tr|G3MWV5|G3MWV5_BOVIN	Uncharacterized protein OS=Bos taurus GN=HIST1H1E PE=3 SV=1
	sp|P13752|HA1A_BOVIN	BOLA class I histocompatibility antigen, alpha chain BL3-6 OS=Bos taurus PE=2 SV=1
	sp|Q2KJI3|FA49B_BOVIN	Protein FAM49B OS=Bos taurus GN=FAM49B PE=2 SV=1
	REVERSE_tr|E1BH55|E1BH55_BOVIN-R	Uncharacterized protein OS=Bos taurus GN=LOC504623 PE=3 SV=2
	sp|A2VE52|ORN_BOVIN	Oligoribonuclease, mitochondrial OS=Bos taurus GN=REXO2 PE=2 SV=1
	sp|P04975|CLCB_BOVIN	Clathrin light chain B OS=Bos taurus GN=CLTB PE=1 SV=1
	sp|Q3ZCD0|CD81_BOVIN	CD81 antigen OS=Bos taurus GN=CD81 PE=2 SV=1
	tr|E1BP80|E1BP80_BOVIN	Uncharacterized protein OS=Bos taurus GN=ZNF185 PE=4 SV=2
	tr|F1MEV4|F1MEV4_BOVIN	Uncharacterized protein OS=Bos taurus GN=LOC538751 PE=4 SV=1
	tr|F1N605|F1N605_BOVIN	Uncharacterized protein (Fragment) OS=Bos taurus GN=PICALM PE=4 SV=1
	tr|G5E6N7|G5E6N7_BOVIN	Uncharacterized protein OS=Bos taurus GN=CBX1 PE=4 SV=1
	tr|F1MZU1|F1MZU1_BOVIN	Uncharacterized protein (Fragment) OS=Bos taurus GN=LARP1 PE=4 SV=2
	tr|G3MXL3|G3MXL3_BOVIN	Uncharacterized protein (Fragment) OS=Bos taurus GN=KRT3 PE=3 SV=1
	tr|A7MB04|A7MB04_BOVIN	SPOCK2 protein OS=Bos taurus GN=SPOCK2 PE=2 SV=1
	sp|Q2KHT7|RS27_BOVIN	40S ribosomal protein S27 OS=Bos taurus GN=RPS27 PE=3 SV=3
	tr|G3X6B2|G3X6B2_BOVIN	Uncharacterized protein OS=Bos taurus GN=PRRC2C PE=2 SV=1
	sp|Q0V8R6|HEXA_BOVIN	Beta-hexosaminidase subunit alpha OS=Bos taurus GN=HEXA PE=2 SV=1
	sp|Q2NKU3|BUD31_BOVIN	Protein BUD31 homolog OS=Bos taurus GN=BUD31 PE=2 SV=1
	tr|A7MBI8|A7MBI8_BOVIN	NUDT9 protein OS=Bos taurus GN=NUDT9 PE=2 SV=1
	REVERSE_tr|F1MC13|F1MC13_BOVIN-R	Uncharacterized protein (Fragment) OS=Bos taurus GN=LAMA5 PE=4 SV=2
	tr|F1MWX3|F1MWX3_BOVIN	Uncharacterized protein (Fragment) OS=Bos taurus GN=BOLA PE=3 SV=2
	sp|Q148F1|COF2_BOVIN	Cofilin-2 OS=Bos taurus GN=CFL2 PE=2 SV=1
	REVERSE_sp|Q1JQC1|MFSD1_BOVIN-R	Major facilitator superfamily domain-containing protein 1 OS=Bos taurus GN=MFSD1 PE=2 SV=1
	tr|F6RF06|F6RF06_BOVIN	Uncharacterized protein (Fragment) OS=Bos taurus GN=BOLA PE=2 SV=1
	sp|Q3SZC0|ERH_BOVIN	Enhancer of rudimentary homolog OS=Bos taurus GN=ERH PE=3 SV=1
	tr|F2Z4H3|F2Z4H3_BOVIN	Uncharacterized protein OS=Bos taurus GN=POLR2H PE=2 SV=1
	tr|Q1RMI2|Q1RMI2_BOVIN	Ras homolog gene family, member G (Rho G) OS=Bos taurus GN=RHOG PE=2 SV=1
	sp|A6H730|PPAP_BOVIN	Prostatic acid phosphatase OS=Bos taurus GN=ACPP PE=2 SV=1
	sp|P28782|S10A8_BOVIN	Protein S100-A8 OS=Bos taurus GN=S100A8 PE=1 SV=2
	sp|Q05204|LAMP1_BOVIN	Lysosome-associated membrane glycoprotein 1 OS=Bos taurus GN=LAMP1 PE=1 SV=2
	tr|B2Z4B0|B2Z4B0_BOVIN	Angiopoietin-like protein 2 OS=Bos taurus GN=ANGPTL2 PE=2 SV=1
	tr|Q08DU4|Q08DU4_BOVIN	Interleukin 10 receptor, beta OS=Bos taurus GN=IL10RB PE=2 SV=1
	tr|Q1JPD9|Q1JPD9_BOVIN	G protein-coupled receptor, family C, group 5, member B OS=Bos taurus GN=GPRC5B PE=2 SV=1
	tr|Q2LGB2|Q2LGB2_BOVIN	Lymphocyte antigen 96 OS=Bos taurus GN=MD2 PE=2 SV=1
	sp|O46675|GROG_BOVIN	Growth-regulated protein homolog gamma OS=Bos taurus PE=3 SV=1
	tr|A7YW37|A7YW37_BOVIN	CD58 protein (Fragment) OS=Bos taurus GN=CD58 PE=2 SV=1
	sp|Q28132|SCF_BOVIN	Kit ligand OS=Bos taurus GN=KITLG PE=2 SV=1
	sp|Q3SX46|C1GLC_BOVIN	C1GALT1-specific chaperone 1 OS=Bos taurus GN=C1GALT1C1 PE=2 SV=1
	tr|Q2TBX9|Q2TBX9_BOVIN	Integrin alpha FG-GAP repeat containing 1 OS=Bos taurus GN=ITFG1 PE=2 SV=1
	tr|A5PKA3|A5PKA3_BOVIN	CCDC80 protein OS=Bos taurus GN=CCDC80 PE=2 SV=1
	sp|Q28017|PAFA_BOVIN	Platelet-activating factor acetylhydrolase OS=Bos taurus GN=PLA2G7 PE=2 SV=1
	sp|P48818|ACADV_BOVIN	Very long-chain specific acyl-CoA dehydrogenase, mitochondrial OS=Bos taurus GN=ACADVL PE=2 SV=3
	tr|F1N4Y5|F1N4Y5_BOVIN	Uncharacterized protein OS=Bos taurus GN=BOLA-NC1 PE=3 SV=2
	tr|E1BJC9|E1BJC9_BOVIN	Uncharacterized protein OS=Bos taurus GN=C18H19orf33 PE=4 SV=2
	tr|Q08E55|Q08E55_BOVIN	MBTPS1 protein OS=Bos taurus GN=MBTPS1 PE=2 SV=1
	tr|F1N3G9|F1N3G9_BOVIN	Uncharacterized protein (Fragment) OS=Bos taurus GN=KIRREL PE=4 SV=2
	tr|F1MD22|F1MD22_BOVIN	Uncharacterized protein OS=Bos taurus GN=PTPRU PE=4 SV=2
	REVERSE_tr|F1MLY7|F1MLY7_BOVIN-R	Uncharacterized protein (Fragment) OS=Bos taurus GN=ATR PE=4 SV=2
	sp|A7Z035|EPN4_BOVIN	Clathrin interactor 1 OS=Bos taurus GN=CLINT1 PE=2 SV=1
	tr|Q3ZC60|Q3ZC60_BOVIN	CD200 molecule OS=Bos taurus GN=CD200 PE=2 SV=1
	tr|G3N081|G3N081_BOVIN	Histone H4 OS=Bos taurus GN=LOC100337473 PE=3 SV=1
	sp|P79391|OLR1_BOVIN	Oxidized low-density lipoprotein receptor 1 OS=Bos taurus GN=OLR1 PE=1 SV=1
	REVERSE_tr|E1B882|E1B882_BOVIN-R	Uncharacterized protein OS=Bos taurus GN=MXRA5 PE=4 SV=1
	tr|Q32KR9|Q32KR9_BOVIN	Chromatin modifying protein 1A OS=Bos taurus GN=CHMP1A PE=2 SV=1
	REVERSE_tr|E1BBB3|E1BBB3_BOVIN-R	Uncharacterized protein OS=Bos taurus GN=LOC100138004 PE=4 SV=2
	sp|Q2KHV5|NDUF7_BOVIN	NADH dehydrogenase [ubiquinone] complex I, assembly factor 7 OS=Bos taurus GN=NDUFAF7 PE=2 SV=2
	tr|E1BIU0|E1BIU0_BOVIN	Uncharacterized protein OS=Bos taurus GN=SEC24C PE=4 SV=1
	REVERSE_tr|F1MPK7|F1MPK7_BOVIN-R	Uncharacterized protein (Fragment) OS=Bos taurus GN=LOC516421 PE=2 SV=2
	sp|O18963|CP2E1_BOVIN	Cytochrome P450 2E1 OS=Bos taurus GN=CYP2E1 PE=2 SV=1
	tr|E1BM53|E1BM53_BOVIN	Uncharacterized protein OS=Bos taurus GN=RSG1 PE=4 SV=1
	tr|F6R7H1|F6R7H1_BOVIN	Uncharacterized protein OS=Bos taurus GN=UPP2 PE=4 SV=1
	REVERSE_sp|Q32L08|AMN1_BOVIN-R	Protein AMN1 homolog OS=Bos taurus GN=AMN1 PE=2 SV=2
	tr|F1MY95|F1MY95_BOVIN	Uncharacterized protein OS=Bos taurus GN=KCND3 PE=4 SV=2
	REVERSE_tr|F1N2X1|F1N2X1_BOVIN-R	Uncharacterized protein OS=Bos taurus GN=SLC12A6 PE=4 SV=2
	tr|F1MCN4|F1MCN4_BOVIN	Uncharacterized protein OS=Bos taurus GN=STARD13 PE=4 SV=2
	REVERSE_tr|F1MDU7|F1MDU7_BOVIN-R	DNA topoisomerase 2 OS=Bos taurus GN=TOP2A PE=3 SV=2
	tr|G3X6W2|G3X6W2_BOVIN	Uncharacterized protein OS=Bos taurus GN=LOC101909711 PE=4 SV=1
	tr|Q29RS3|Q29RS3_BOVIN	IQ motif containing B1 OS=Bos taurus GN=IQCB1 PE=2 SV=1
	REVERSE_sp|Q24K09|DNMT1_BOVIN-R	DNA (cytosine-5)-methyltransferase 1 OS=Bos taurus GN=DNMT1 PE=2 SV=1
	REVERSE_tr|E1BHE1|E1BHE1_BOVIN-R	Uncharacterized protein OS=Bos taurus GN=TAOK3 PE=4 SV=1
	sp|P26285|F262_BOVIN	6-phosphofructo-2-kinase/fructose-2,6-bisphosphatase 2 OS=Bos taurus GN=PFKFB2 PE=1 SV=2
	sp|Q2T9P3|RGP1_BOVIN	Retrograde Golgi transport protein RGP1 homolog OS=Bos taurus GN=RGP1 PE=2 SV=1
	sp|Q148H5|K2C71_BOVIN	Keratin, type II cytoskeletal 71 OS=Bos taurus GN=KRT71 PE=2 SV=1
	tr|E1BKL5|E1BKL5_BOVIN	Uncharacterized protein OS=Bos taurus GN=PAX7 PE=3 SV=1
	tr|Q17QR2|Q17QR2_BOVIN	STAM binding protein OS=Bos taurus GN=STAMBP PE=2 SV=1
	tr|E1BC58|E1BC58_BOVIN	Uncharacterized protein OS=Bos taurus GN=RAB2B PE=3 SV=1
	sp|Q0VD34|PHYIP_BOVIN	Phytanoyl-CoA hydroxylase-interacting protein OS=Bos taurus GN=PHYHIP PE=2 SV=1
	REVERSE_tr|F1MPC2|F1MPC2_BOVIN-R	Anoctamin (Fragment) OS=Bos taurus GN=ANO5 PE=3 SV=2
	REVERSE_tr|Q0IIG0|Q0IIG0_BOVIN-R	Nucleolar and coiled-body phosphoprotein 1 OS=Bos taurus GN=NOLC1 PE=2 SV=1
	REVERSE_tr|E1BNV7|E1BNV7_BOVIN-R	Uncharacterized protein OS=Bos taurus GN=MYO9B PE=4 SV=2
	sp|Q28178|TSP1_BOVIN	Thrombospondin-1 OS=Bos taurus GN=THBS1 PE=2 SV=2
	sp|A6QPN6|GILT_BOVIN	Gamma-interferon-inducible lysosomal thiol reductase OS=Bos taurus GN=IFI30 PE=2 SV=1
	tr|F1MEP6|F1MEP6_BOVIN	Epithelial cell adhesion molecule OS=Bos taurus GN=EPCAM PE=4 SV=1
	sp|Q6R8F2|CADH1_BOVIN	Cadherin-1 OS=Bos taurus GN=CDH1 PE=2 SV=1
	sp|P02253|H12_BOVIN	Histone H1.2 OS=Bos taurus GN=HIST1H1C PE=1 SV=2
	sp|Q3T0B7|RS27L_BOVIN	40S ribosomal protein S27-like OS=Bos taurus GN=RPS27L PE=3 SV=3
	sp|Q148H7|K2C79_BOVIN	Keratin, type II cytoskeletal 79 OS=Bos taurus GN=KRT79 PE=2 SV=1
	tr|G3MZL8|G3MZL8_BOVIN	Uncharacterized protein (Fragment) OS=Bos taurus PE=3 SV=1
	tr|G3X7S7|G3X7S7_BOVIN	Tropomyosin alpha-1 chain (Fragment) OS=Bos taurus GN=TPM1 PE=3 SV=1
	sp|P33545|DSC2_BOVIN	Desmocollin-2 (Fragment) OS=Bos taurus GN=DSC2 PE=2 SV=1
	tr|A2VDX0|A2VDX0_BOVIN	TWF2 protein OS=Bos taurus GN=TWF2 PE=2 SV=1
	sp|A6QNX5|K2C78_BOVIN	Keratin, type II cytoskeletal 78 OS=Bos taurus GN=KRT78 PE=2 SV=1
	tr|F1MKE7|F1MKE7_BOVIN	Uncharacterized protein (Fragment) OS=Bos taurus PE=3 SV=2
	tr|E1B9E8|E1B9E8_BOVIN	Beta-hexosaminidase OS=Bos taurus PE=3 SV=2
	tr|E1BGX1|E1BGX1_BOVIN	Uncharacterized protein OS=Bos taurus GN=TAF15 PE=4 SV=2
	sp|P61626|LYSC_HUMAN	Lysozyme C OS=Homo sapiens GN=LYZ PE=1 SV=1
	tr|G3MYV4|G3MYV4_BOVIN	Histone H2B OS=Bos taurus GN=LOC520044 PE=3 SV=1
	tr|E1BCW3|E1BCW3_BOVIN	6-phosphofructokinase OS=Bos taurus GN=PFKP PE=3 SV=2
	sp|Q3SZ52|UB2V1_BOVIN	Ubiquitin-conjugating enzyme E2 variant 1 OS=Bos taurus GN=UBE2V1 PE=2 SV=1
	tr|F1MVX6|F1MVX6_BOVIN	Histone H2B OS=Bos taurus GN=LOC101906927 PE=3 SV=2
	sp|P48616|VIME_BOVIN	Vimentin OS=Bos taurus GN=VIM PE=1 SV=3
	sp|A2VE31|S38A2_BOVIN	Sodium-coupled neutral amino acid transporter 2 OS=Bos taurus GN=SLC38A2 PE=2 SV=1
	sp|A2VE47|ADPGK_BOVIN	ADP-dependent glucokinase OS=Bos taurus GN=ADPGK PE=2 SV=1
	sp|F1MH07|MICA1_BOVIN	Protein-methionine sulfoxide oxidase MICAL1 OS=Bos taurus GN=MICAL1 PE=2 SV=1
	sp|P08814|PTMS_BOVIN	Parathymosin OS=Bos taurus GN=PTMS PE=1 SV=2
	sp|P19483|ATPA_BOVIN	ATP synthase subunit alpha, mitochondrial OS=Bos taurus GN=ATP5A1 PE=1 SV=1
	sp|P21327|INPP_BOVIN	Inositol polyphosphate 1-phosphatase OS=Bos taurus GN=INPP1 PE=1 SV=2
	sp|P21809|PGS1_BOVIN	Biglycan OS=Bos taurus GN=BGN PE=1 SV=3
	sp|P52176|MMP9_BOVIN	Matrix metalloproteinase-9 OS=Bos taurus GN=MMP9 PE=2 SV=1
	sp|P60986|PIP_BOVIN	Prolactin-inducible protein homolog OS=Bos taurus GN=PIP PE=3 SV=1
	sp|Q0P570|MVD1_BOVIN	Diphosphomevalonate decarboxylase OS=Bos taurus GN=MVD PE=2 SV=1
	sp|Q1JQA7|TIGAR_BOVIN	Fructose-2,6-bisphosphatase TIGAR OS=Bos taurus GN=TIGAR PE=2 SV=1
	sp|Q32PI9|MPZL1_BOVIN	Myelin protein zero-like protein 1 OS=Bos taurus GN=MPZL1 PE=2 SV=1
	sp|Q3T0N1|MB12A_BOVIN	Multivesicular body subunit 12A OS=Bos taurus GN=MVB12A PE=2 SV=1
	sp|Q92180|GCNT1_BOVIN	Beta-1,3-galactosyl-O-glycosyl-glycoprotein beta-1,6-N-acetylglucosaminyltransferase OS=Bos taurus GN=GCNT1 PE=2 SV=1
	sp|Q9XSC9|TCO2_BOVIN	Transcobalamin-2 OS=Bos taurus GN=TCN2 PE=1 SV=1
	tr|A4IFU2|A4IFU2_BOVIN	RAP2B protein OS=Bos taurus GN=RAP2B PE=2 SV=1
	tr|E1B725|E1B725_BOVIN	Uncharacterized protein OS=Bos taurus GN=GLA PE=4 SV=2
	tr|E1B8A0|E1B8A0_BOVIN	Uncharacterized protein OS=Bos taurus GN=ACP5 PE=2 SV=1
	tr|E1BD36|E1BD36_BOVIN	Uncharacterized protein OS=Bos taurus GN=IL6ST PE=4 SV=1
	tr|E1BDA6|E1BDA6_BOVIN	Fibroblast growth factor OS=Bos taurus GN=FGF21 PE=3 SV=1
	tr|E1BFD0|E1BFD0_BOVIN	Uncharacterized protein OS=Bos taurus GN=CHI3L2 PE=3 SV=1
	tr|E1BQ28|E1BQ28_BOVIN	Uncharacterized protein OS=Bos taurus GN=SLC39A8 PE=4 SV=1
	tr|F1MLT0|F1MLT0_BOVIN	Uncharacterized protein OS=Bos taurus GN=BMP7 PE=2 SV=1
	tr|F1MQX1|F1MQX1_BOVIN	Uncharacterized protein OS=Bos taurus GN=SRPX PE=4 SV=1
	tr|F1MRR1|F1MRR1_BOVIN	Uncharacterized protein (Fragment) OS=Bos taurus GN=KREMEN1 PE=4 SV=1
	tr|F1MTX6|F1MTX6_BOVIN	Uncharacterized protein (Fragment) OS=Bos taurus GN=MMP3 PE=4 SV=2
	tr|F1MUC5|F1MUC5_BOVIN	Uncharacterized protein OS=Bos taurus GN=COL15A1 PE=4 SV=2
	tr|F1MVT9|F1MVT9_BOVIN	Uncharacterized protein (Fragment) OS=Bos taurus GN=SPOCK1 PE=4 SV=2
	tr|F1MXD2|F1MXD2_BOVIN	Uncharacterized protein (Fragment) OS=Bos taurus GN=CDCP1 PE=4 SV=2
	tr|F1N1S6|F1N1S6_BOVIN	Uncharacterized protein (Fragment) OS=Bos taurus GN=C1RL PE=4 SV=2
	tr|F1N2D5|F1N2D5_BOVIN	Uncharacterized protein OS=Bos taurus GN=IDS PE=4 SV=2
	tr|F1N2J8|F1N2J8_BOVIN	Uncharacterized protein OS=Bos taurus GN=C16orf89 PE=4 SV=2
	tr|F1N348|F1N348_BOVIN	Uncharacterized protein OS=Bos taurus GN=AMIGO2 PE=4 SV=2
	tr|F1N5W4|F1N5W4_BOVIN	Uncharacterized protein (Fragment) OS=Bos taurus GN=ENPP5 PE=4 SV=2
	tr|F6QLF1|F6QLF1_BOVIN	Uncharacterized protein OS=Bos taurus GN=HAPLN3 PE=4 SV=1
	tr|G3MWH1|G3MWH1_BOVIN	Uncharacterized protein OS=Bos taurus GN=TPD52L2 PE=2 SV=1
	tr|G3X6G7|G3X6G7_BOVIN	Uncharacterized protein OS=Bos taurus GN=METRNL PE=4 SV=1
	tr|G5E598|G5E598_BOVIN	Uncharacterized protein OS=Bos taurus GN=CD99 PE=4 SV=1
	tr|Q0II49|Q0II49_BOVIN	Interferon-induced protein 35 OS=Bos taurus GN=IFI35 PE=2 SV=1
	tr|Q0VCH9|Q0VCH9_BOVIN	GLI pathogenesis-related 2 OS=Bos taurus GN=GLIPR2 PE=2 SV=1
	tr|Q2KI48|Q2KI48_BOVIN	Pituitary tumor-transforming 1 interacting protein OS=Bos taurus GN=PTTG1IP PE=2 SV=1
	tr|Q2NL04|Q2NL04_BOVIN	TAP binding protein (Tapasin) OS=Bos taurus GN=TAPBP PE=2 SV=1
	tr|Q2YDK6|Q2YDK6_BOVIN	Dickkopf-like 1 (Soggy) OS=Bos taurus GN=DKKL1 PE=2 SV=1
	tr|Q9N0E6|Q9N0E6_BOVIN	Midkine OS=Bos taurus GN=bMK PE=2 SV=1
	sp|Q3T0C6|AT1B3_BOVIN	Sodium/potassium-transporting ATPase subunit beta-3 OS=Bos taurus GN=ATP1B3 PE=2 SV=1
	tr|E1BN54|E1BN54_BOVIN	Uncharacterized protein OS=Bos taurus GN=CER1 PE=4 SV=1
	tr|E1BAU7|E1BAU7_BOVIN	Uncharacterized protein OS=Bos taurus GN=SERPINB7 PE=3 SV=1
	tr|F1MNK0|F1MNK0_BOVIN	Uncharacterized protein OS=Bos taurus GN=BCL2L13 PE=4 SV=1
	tr|F1MUJ7|F1MUJ7_BOVIN	Uncharacterized protein (Fragment) OS=Bos taurus GN=B4GALT5 PE=4 SV=1
	tr|E1BMI4|E1BMI4_BOVIN	Uncharacterized protein OS=Bos taurus GN=UXS1 PE=4 SV=1
	REVERSE_tr|Q2TBH3|Q2TBH3_BOVIN-R	Actin related protein M1 OS=Bos taurus GN=ARPM1 PE=2 SV=1
	sp|A2VDN6|SF3A1_BOVIN	Splicing factor 3A subunit 1 OS=Bos taurus GN=SF3A1 PE=2 SV=1
	tr|E1BB36|E1BB36_BOVIN	Uncharacterized protein (Fragment) OS=Bos taurus GN=MGAT2 PE=4 SV=2
	tr|E1BBU4|E1BBU4_BOVIN	Uncharacterized protein OS=Bos taurus GN=ADAM15 PE=4 SV=2
	sp|A2VDP5|ENPP4_BOVIN	Bis(5'-adenosyl)-triphosphatase ENPP4 OS=Bos taurus GN=ENPP4 PE=2 SV=1
	sp|Q6B411|LYSM_BOVIN	Lysozyme C, milk isozyme OS=Bos taurus PE=2 SV=1
	tr|F1MM68|F1MM68_BOVIN	Interstitial collagenase (Fragment) OS=Bos taurus GN=MMP1 PE=4 SV=2
	tr|G3N2P6|G3N2P6_BOVIN	Uncharacterized protein OS=Bos taurus GN=LOC101905591 PE=3 SV=1
	REVERSE_tr|E1BAE9|E1BAE9_BOVIN-R	Uncharacterized protein OS=Bos taurus GN=ZNF461 PE=4 SV=2
	sp|A5D7M7|TMM88_BOVIN	Transmembrane protein 88 OS=Bos taurus GN=TMEM88 PE=2 SV=1
	REVERSE_sp|Q2KHV7|UBP2_BOVIN-R	Ubiquitin carboxyl-terminal hydrolase 2 OS=Bos taurus GN=USP2 PE=2 SV=1
	tr|F1MHJ6|F1MHJ6_BOVIN	60S ribosomal protein L18a OS=Bos taurus PE=3 SV=2
	tr|G3N222|G3N222_BOVIN	Uncharacterized protein (Fragment) OS=Bos taurus PE=3 SV=1
	REVERSE_sp|Q3ZBY7|DEGS1_BOVIN-R	Sphingolipid delta(4)-desaturase DES1 OS=Bos taurus GN=DEGS1 PE=2 SV=1
	sp|Q3MHE8|SRPR_BOVIN	Signal recognition particle receptor subunit alpha OS=Bos taurus GN=SRPR PE=2 SV=1
	tr|G3N3V1|G3N3V1_BOVIN	Uncharacterized protein OS=Bos taurus PE=3 SV=1
	tr|F1MLK9|F1MLK9_BOVIN	Uncharacterized protein OS=Bos taurus GN=HSCB PE=4 SV=1
	tr|Q08E01|Q08E01_BOVIN	Adducin 3 (Gamma) OS=Bos taurus GN=ADD3 PE=2 SV=1
	tr|E1BHD8|E1BHD8_BOVIN	Uncharacterized protein OS=Bos taurus GN=GXYLT1 PE=4 SV=1
	tr|E1BKB7|E1BKB7_BOVIN	Uncharacterized protein OS=Bos taurus GN=MGA PE=3 SV=2
	REVERSE_tr|E1BIS9|E1BIS9_BOVIN-R	Uncharacterized protein OS=Bos taurus GN=SULT1C3 PE=4 SV=1
	REVERSE_tr|F1MZX0|F1MZX0_BOVIN-R	Protein kinase C delta type OS=Bos taurus GN=PRKCD PE=3 SV=1
	sp|Q3SZU0|GTSF1_BOVIN	Gametocyte-specific factor 1 OS=Bos taurus GN=GTSF1 PE=2 SV=1
	tr|A7MB72|A7MB72_BOVIN	MGC166429 protein OS=Bos taurus GN=MGC166429 PE=2 SV=1
	tr|A7YY64|A7YY64_BOVIN	B3GNT2 protein OS=Bos taurus GN=B3GNT2 PE=2 SV=1
	tr|E1B8U3|E1B8U3_BOVIN	Uncharacterized protein OS=Bos taurus GN=GREB1 PE=4 SV=2
	sp|P04040|CATA_HUMAN	Catalase OS=Homo sapiens GN=CAT PE=1 SV=3
	tr|F1MUT0|F1MUT0_BOVIN	Uncharacterized protein OS=Bos taurus GN=SETD7 PE=4 SV=1
	tr|E1BDM4|E1BDM4_BOVIN	Uncharacterized protein OS=Bos taurus GN=FIBCD1 PE=4 SV=2
	sp|Q58CS6|IFT20_BOVIN	Intraflagellar transport protein 20 homolog OS=Bos taurus GN=IFT20 PE=2 SV=1
	tr|E1BNW5|E1BNW5_BOVIN	Uncharacterized protein OS=Bos taurus GN=SH3D19 PE=4 SV=2
	sp|A6QLR4|FLOT2_BOVIN	Flotillin-2 OS=Bos taurus GN=FLOT2 PE=2 SV=1
	tr|F1MBF0|F1MBF0_BOVIN	Eukaryotic translation initiation factor 2 subunit 1 OS=Bos taurus GN=EIF2A PE=4 SV=1
	sp|Q2KIZ8|MCM6_BOVIN	DNA replication licensing factor MCM6 OS=Bos taurus GN=MCM6 PE=2 SV=1
	sp|A6QPT7|ERAP2_BOVIN	Endoplasmic reticulum aminopeptidase 2 OS=Bos taurus GN=ERAP2 PE=2 SV=1
	sp|Q0V8H6|MOV10_BOVIN	Putative helicase MOV-10 OS=Bos taurus GN=MOV10 PE=2 SV=1
	sp|Q5EAB4|CHID1_BOVIN	Chitinase domain-containing protein 1 OS=Bos taurus GN=CHID1 PE=2 SV=1
	tr|A6QL77|A6QL77_BOVIN	P4HA1 protein OS=Bos taurus GN=P4HA1 PE=2 SV=1
	sp|P79126|PPM1G_BOVIN	Protein phosphatase 1G OS=Bos taurus GN=PPM1G PE=2 SV=2
	tr|A5D7D9|A5D7D9_BOVIN	DHX15 protein OS=Bos taurus GN=DHX15 PE=2 SV=1
	sp|Q3SZR8|SRSF3_BOVIN	Serine/arginine-rich splicing factor 3 OS=Bos taurus GN=SRSF3 PE=2 SV=1
	tr|A6QLJ6|A6QLJ6_BOVIN	SCEL protein OS=Bos taurus GN=SCEL PE=2 SV=1
	sp|A4FUD3|U5S1_BOVIN	116 kDa U5 small nuclear ribonucleoprotein component OS=Bos taurus GN=EFTUD2 PE=2 SV=1
	sp|P80746|ITAV_BOVIN	Integrin alpha-V OS=Bos taurus GN=ITGAV PE=1 SV=3
	tr|F1N405|F1N405_BOVIN	Reticulon OS=Bos taurus GN=RTN4 PE=2 SV=1
	tr|Q5E949|Q5E949_BOVIN	HMT1 hnRNP methyltransferase-like 2 isoform 3 OS=Bos taurus GN=HRMT1L2 PE=2 SV=1
	tr|Q05B79|Q05B79_BOVIN	DEAH (Asp-Glu-Ala-His) box polypeptide 36 OS=Bos taurus GN=DHX36 PE=2 SV=1
	sp|Q0VCX5|ERF1_BOVIN	Eukaryotic peptide chain release factor subunit 1 OS=Bos taurus GN=ETF1 PE=2 SV=3
	sp|Q0VCW8|PDCL3_BOVIN	Phosducin-like protein 3 OS=Bos taurus GN=PDCL3 PE=2 SV=1
	sp|Q0VD53|VP26A_BOVIN	Vacuolar protein sorting-associated protein 26A OS=Bos taurus GN=VPS26A PE=2 SV=1
	tr|E1BIA7|E1BIA7_BOVIN	Clustered mitochondria protein homolog OS=Bos taurus GN=CLUH PE=3 SV=2
	REVERSE_tr|F1ML48|F1ML48_BOVIN-R	Uncharacterized protein OS=Bos taurus GN=MORC4 PE=4 SV=2
	sp|O46411|5NTC_BOVIN	Cytosolic purine 5'-nucleotidase OS=Bos taurus GN=NT5C2 PE=1 SV=1
	sp|Q0V8B7|MCM5_BOVIN	DNA replication licensing factor MCM5 OS=Bos taurus GN=MCM5 PE=2 SV=1
	sp|Q32LE9|CSRP2_BOVIN	Cysteine and glycine-rich protein 2 OS=Bos taurus GN=CSRP2 PE=2 SV=3
	sp|Q3ZBH9|MCM7_BOVIN	DNA replication licensing factor MCM7 OS=Bos taurus GN=MCM7 PE=2 SV=1
	sp|Q3ZC89|MAP2_BOVIN	Methionine aminopeptidase 2 OS=Bos taurus GN=METAP2 PE=2 SV=1
	tr|E1BB38|E1BB38_BOVIN	Signal recognition particle subunit SRP72 OS=Bos taurus GN=SRP72 PE=3 SV=1
	sp|Q5E9Q1|PGLT1_BOVIN	Protein O-glucosyltransferase 1 OS=Bos taurus GN=POGLUT1 PE=2 SV=1
	sp|P20004|ACON_BOVIN	Aconitate hydratase, mitochondrial OS=Bos taurus GN=ACO2 PE=1 SV=4
	sp|Q58DG1|MYG1_BOVIN	UPF0160 protein MYG1, mitochondrial OS=Bos taurus PE=2 SV=1
	sp|Q28141|DHX9_BOVIN	ATP-dependent RNA helicase A OS=Bos taurus GN=DHX9 PE=2 SV=1
	sp|Q1JQB2|BUB3_BOVIN	Mitotic checkpoint protein BUB3 OS=Bos taurus GN=BUB3 PE=2 SV=1
	sp|A4FUC9|RHPN2_BOVIN	Rhophilin-2 OS=Bos taurus GN=RHPN2 PE=2 SV=1
	sp|O62703|CTBL1_BOVIN	Beta-catenin-like protein 1 OS=Bos taurus GN=CTNNBL1 PE=2 SV=3
	sp|P02662|CASA1_BOVIN	Alpha-S1-casein OS=Bos taurus GN=CSN1S1 PE=1 SV=2
	sp|P80457|XDH_BOVIN	Xanthine dehydrogenase/oxidase OS=Bos taurus GN=XDH PE=1 SV=4
	sp|Q3ZBT6|TRA2B_BOVIN	Transformer-2 protein homolog beta OS=Bos taurus GN=TRA2B PE=2 SV=1
	tr|Q7YRE7|Q7YRE7_BOVIN	Protein O-fucosyltransferase 1a OS=Bos taurus GN=pofut1 PE=2 SV=1
	sp|Q3T0U1|MESD_BOVIN	LDLR chaperone MESD OS=Bos taurus GN=MESDC2 PE=2 SV=1
	tr|Q2KJ71|Q2KJ71_BOVIN	Transformer 2 alpha homolog (Drosophila) OS=Bos taurus GN=TRA2A PE=2 SV=1
	sp|E1BBG2|MILK1_BOVIN	MICAL-like protein 1 OS=Bos taurus GN=MICALL1 PE=1 SV=2
	sp|Q76BS1|HGF_BOVIN	Hepatocyte growth factor OS=Bos taurus GN=HGF PE=2 SV=1
	tr|F1MF11|F1MF11_BOVIN	Uncharacterized protein (Fragment) OS=Bos taurus GN=PLCH1 PE=4 SV=1
	REVERSE_tr|E1BNN5|E1BNN5_BOVIN-R	Uncharacterized protein OS=Bos taurus GN=KIF27 PE=3 SV=1
	tr|A0JBZ9|A0JBZ9_BOVIN	Bucentaur-2 OS=Bos taurus GN=p97bcnt2 PE=2 SV=1
	sp|Q28165|PABP2_BOVIN	Polyadenylate-binding protein 2 OS=Bos taurus GN=PABPN1 PE=1 SV=3
	tr|C1JZ67|C1JZ67_BOVIN	Importin subunit alpha OS=Bos taurus GN=KPNA4 PE=2 SV=1
	sp|Q29RL9|TCEA1_BOVIN	Transcription elongation factor A protein 1 OS=Bos taurus GN=TCEA1 PE=2 SV=1
	sp|Q2KI14|NAA10_BOVIN	N-alpha-acetyltransferase 10 OS=Bos taurus GN=NAA10 PE=2 SV=1
	sp|Q5EAC7|CPIN1_BOVIN	Anamorsin OS=Bos taurus GN=CIAPIN1 PE=2 SV=1
	sp|Q3T112|PSB8_BOVIN	Proteasome subunit beta type-8 OS=Bos taurus GN=PSMB8 PE=1 SV=2
	sp|A3KN22|UBC12_BOVIN	NEDD8-conjugating enzyme Ubc12 OS=Bos taurus GN=UBE2M PE=2 SV=1
	tr|Q29RQ2|Q29RQ2_BOVIN	KH domain containing, RNA binding, signal transduction associated 1 OS=Bos taurus GN=KHDRBS1 PE=2 SV=1
	sp|A0JND3|EOGT_BOVIN	EGF domain-specific O-linked N-acetylglucosamine transferase OS=Bos taurus GN=EOGT PE=2 SV=1
	tr|A7Z018|A7Z018_BOVIN	RCC1 protein OS=Bos taurus GN=RCC1 PE=2 SV=1
	sp|Q3SYT7|PSMD8_BOVIN	26S proteasome non-ATPase regulatory subunit 8 OS=Bos taurus GN=PSMD8 PE=2 SV=3
	sp|Q95JC7|AAAT_BOVIN	Neutral amino acid transporter B(0) OS=Bos taurus GN=SLC1A5 PE=2 SV=1
	tr|Q2KII9|Q2KII9_BOVIN	Dynein, cytoplasmic 1, light intermediate chain 1 OS=Bos taurus GN=DYNC1LI1 PE=2 SV=1
	tr|Q3SWY7|Q3SWY7_BOVIN	Splicing factor 3a, subunit 3 OS=Bos taurus GN=SF3A3 PE=2 SV=1
	tr|A6QQW3|A6QQW3_BOVIN	Signal recognition particle subunit SRP68 OS=Bos taurus GN=SRP68 PE=2 SV=1
	tr|F1MU48|F1MU48_BOVIN	DNA topoisomerase 2 (Fragment) OS=Bos taurus GN=TOP2B PE=3 SV=2
	tr|F1MZX7|F1MZX7_BOVIN	Uncharacterized protein (Fragment) OS=Bos taurus GN=KDELC2 PE=4 SV=2
	tr|Q58DR1|Q58DR1_BOVIN	Histone acetyltransferase 1 OS=Bos taurus GN=HAT1 PE=2 SV=1
	sp|Q2HJH0|LSM5_BOVIN	U6 snRNA-associated Sm-like protein LSm5 OS=Bos taurus GN=LSM5 PE=3 SV=3
	sp|O76009|KT33A_HUMAN	Keratin, type I cuticular Ha3-I OS=Homo sapiens GN=KRT33A PE=2 SV=2
	REVERSE_sp|Q32LF0|NPT3_BOVIN-R	Sodium-dependent phosphate transport protein 3 OS=Bos taurus GN=SLC17A2 PE=2 SV=1
	tr|E1B9N6|E1B9N6_BOVIN	Uncharacterized protein OS=Bos taurus GN=EVPL PE=4 SV=1
	REVERSE_tr|F1N6T0|F1N6T0_BOVIN-R	Uncharacterized protein (Fragment) OS=Bos taurus GN=ZFPM1 PE=4 SV=1
	tr|F6RCB9|F6RCB9_BOVIN	Uncharacterized protein OS=Bos taurus PE=4 SV=1
	tr|F1MLS8|F1MLS8_BOVIN	Uncharacterized protein OS=Bos taurus GN=KIAA1217 PE=4 SV=2
	tr|A2VDT8|A2VDT8_BOVIN	Hermansky-Pudlak syndrome 6 OS=Bos taurus GN=HPS6 PE=2 SV=1
	REVERSE_tr|E1BIU4|E1BIU4_BOVIN-R	Uncharacterized protein OS=Bos taurus GN=ZC3H7B PE=4 SV=2
	sp|P02522|CRBB2_BOVIN	Beta-crystallin B2 OS=Bos taurus GN=CRYBB2 PE=1 SV=3
	sp|Q0VC36|1433S_BOVIN	14-3-3 protein sigma OS=Bos taurus GN=SFN PE=2 SV=1
	tr|F1MF50|F1MF50_BOVIN	Rho-associated protein kinase 1 OS=Bos taurus GN=ROCK1 PE=4 SV=2
	tr|A4FUC6|A4FUC6_BOVIN	SFRS9 protein OS=Bos taurus GN=SFRS9 PE=2 SV=1
	sp|A0JND2|K2C80_BOVIN	Keratin, type II cytoskeletal 80 OS=Bos taurus GN=KRT80 PE=2 SV=1
	sp|P00711|LALBA_BOVIN	Alpha-lactalbumin OS=Bos taurus GN=LALBA PE=1 SV=2
	sp|Q0VC24|WDR12_BOVIN	Ribosome biogenesis protein WDR12 OS=Bos taurus GN=WDR12 PE=2 SV=1
	sp|Q32L31|HMGB3_BOVIN	High mobility group protein B3 OS=Bos taurus GN=HMGB3 PE=2 SV=2
	sp|Q3SZ45|SDF2_BOVIN	Stromal cell-derived factor 2 OS=Bos taurus GN=SDF2 PE=2 SV=1
	sp|Q3T058|EI2BD_BOVIN	Translation initiation factor eIF-2B subunit delta OS=Bos taurus GN=EIF2B4 PE=2 SV=1
	sp|Q5EA50|RABEK_BOVIN	Rab9 effector protein with kelch motifs OS=Bos taurus GN=RABEPK PE=2 SV=1
	tr|A7YWH5|A7YWH5_BOVIN	DKC1 protein OS=Bos taurus GN=DKC1 PE=2 SV=1
	tr|Q24K04|Q24K04_BOVIN	RAN binding protein 3 OS=Bos taurus GN=RANBP3 PE=2 SV=1
	tr|Q3ZBU5|Q3ZBU5_BOVIN	FUS interacting protein (Serine/arginine-rich) 1 OS=Bos taurus GN=FUSIP1 PE=2 SV=1
	tr|Q58DA3|Q58DA3_BOVIN	Putative uncharacterized protein LYAR OS=Bos taurus GN=LYAR PE=2 SV=1
	tr|Q5E952|Q5E952_BOVIN	RNA binding protein (Autoantigenic, hnRNP-associated with lethal yellow) short isoform OS=Bos taurus GN=RALY PE=2 SV=1
	sp|Q08DQ0|PKP3_BOVIN	Plakophilin-3 OS=Bos taurus GN=PKP3 PE=2 SV=1
	sp|Q3SZM9|NAGK_BOVIN	N-acetyl-D-glucosamine kinase OS=Bos taurus GN=NAGK PE=2 SV=1
	sp|A1A4K8|U2AF1_BOVIN	Splicing factor U2AF 35 kDa subunit OS=Bos taurus GN=U2AF1 PE=2 SV=1
	sp|Q9TTS3|ACACA_BOVIN	Acetyl-CoA carboxylase 1 OS=Bos taurus GN=ACACA PE=2 SV=1
	sp|Q3T0V7|EDF1_BOVIN	Endothelial differentiation-related factor 1 OS=Bos taurus GN=EDF1 PE=2 SV=1
	sp|A1A4Q4|TMA7_BOVIN	Translation machinery-associated protein 7 OS=Bos taurus GN=TMA7 PE=3 SV=1
	sp|A6QQ21|CSN6_BOVIN	COP9 signalosome complex subunit 6 OS=Bos taurus GN=COPS6 PE=2 SV=1
	tr|F1N556|F1N556_BOVIN	Ubiquitin carboxyl-terminal hydrolase (Fragment) OS=Bos taurus GN=USP7 PE=3 SV=2
	tr|A8E4N0|A8E4N0_BOVIN	AP1G2 protein OS=Bos taurus GN=AP1G2 PE=2 SV=1
	sp|Q1JQD2|GRWD1_BOVIN	Glutamate-rich WD repeat-containing protein 1 OS=Bos taurus GN=GRWD1 PE=2 SV=1
	tr|F1MTN1|F1MTN1_BOVIN	Integrin beta OS=Bos taurus GN=ITGB3 PE=2 SV=1
	sp|Q2NL37|BCCIP_BOVIN	BRCA2 and CDKN1A-interacting protein OS=Bos taurus GN=BCCIP PE=2 SV=1
	tr|Q08DY5|Q08DY5_BOVIN	Nuclear receptor binding protein 1 OS=Bos taurus GN=NRBP1 PE=2 SV=1
	sp|Q1RMM1|ZC3HF_BOVIN	Zinc finger CCCH domain-containing protein 15 OS=Bos taurus GN=ZC3H15 PE=2 SV=1
	sp|Q17QQ2|TPMT_BOVIN	Thiopurine S-methyltransferase OS=Bos taurus GN=TPMT PE=2 SV=1
	tr|Q24JZ4|Q24JZ4_BOVIN	Metadherin OS=Bos taurus GN=MTDH PE=2 SV=1
	sp|Q32PG1|AP3B1_BOVIN	AP-3 complex subunit beta-1 OS=Bos taurus GN=AP3B1 PE=2 SV=1
	sp|Q2KJD7|UBCP1_BOVIN	Ubiquitin-like domain-containing CTD phosphatase 1 OS=Bos taurus GN=UBLCP1 PE=2 SV=1
	sp|Q3MHI4|PHAX_BOVIN	Phosphorylated adapter RNA export protein OS=Bos taurus GN=PHAX PE=2 SV=2
	tr|A5PJQ1|A5PJQ1_BOVIN	DEK protein OS=Bos taurus GN=DEK PE=2 SV=1
	sp|Q32PJ8|HDAC1_BOVIN	Histone deacetylase 1 OS=Bos taurus GN=HDAC1 PE=2 SV=1
	tr|A6QLB2|A6QLB2_BOVIN	DDX23 protein OS=Bos taurus GN=DDX23 PE=2 SV=1
	tr|F1MQ96|F1MQ96_BOVIN	Uncharacterized protein (Fragment) OS=Bos taurus GN=PRKCI PE=4 SV=2
	sp|P79244|RL37_BOVIN	60S ribosomal protein L37 OS=Bos taurus GN=RPL37 PE=3 SV=4
	sp|Q2HJH7|MEMO1_BOVIN	Protein MEMO1 OS=Bos taurus GN=MEMO1 PE=2 SV=1
	tr|E1BHK2|E1BHK2_BOVIN	Uncharacterized protein OS=Bos taurus GN=ADD1 PE=4 SV=1
	sp|P21282|VATC1_BOVIN	V-type proton ATPase subunit C 1 OS=Bos taurus GN=ATP6V1C1 PE=1 SV=3
	tr|F1N3G4|F1N3G4_BOVIN	Condensin complex subunit 1 OS=Bos taurus GN=NCAPD2 PE=2 SV=2
	sp|A5PK19|MET13_BOVIN	Methyltransferase-like protein 13 OS=Bos taurus GN=METTL13 PE=2 SV=1
	sp|Q2NL22|IF4A3_BOVIN	Eukaryotic initiation factor 4A-III OS=Bos taurus GN=EIF4A3 PE=2 SV=3
	sp|Q0V7M1|KPSH1_BOVIN	Serine/threonine-protein kinase H1 OS=Bos taurus GN=PSKH1 PE=2 SV=1
	tr|E1BBN7|E1BBN7_BOVIN	Uncharacterized protein OS=Bos taurus GN=KIF1B PE=3 SV=2
	tr|E1BHR3|E1BHR3_BOVIN	Uncharacterized protein OS=Bos taurus GN=HDGFRP3 PE=4 SV=2
	sp|P08057|TNNI3_BOVIN	Troponin I, cardiac muscle OS=Bos taurus GN=TNNI3 PE=1 SV=2
	tr|E1BDB0|E1BDB0_BOVIN	Uncharacterized protein OS=Bos taurus GN=EPB41L2 PE=4 SV=1
	sp|Q5EA80|PGTA_BOVIN	Geranylgeranyl transferase type-2 subunit alpha OS=Bos taurus GN=RABGGTA PE=2 SV=1
	tr|A6QLW3|A6QLW3_BOVIN	RPRD1B protein OS=Bos taurus GN=RPRD1B PE=2 SV=1
	tr|A5D7B9|A5D7B9_BOVIN	CASK protein OS=Bos taurus GN=CASK PE=2 SV=1
	sp|Q3SX41|LC7L3_BOVIN	Luc7-like protein 3 OS=Bos taurus GN=LUC7L3 PE=2 SV=1
	tr|F1MQ65|F1MQ65_BOVIN	Uncharacterized protein OS=Bos taurus GN=MYO1E PE=4 SV=2
	tr|E1BKQ6|E1BKQ6_BOVIN	Uncharacterized protein OS=Bos taurus GN=MYO18A PE=4 SV=2
	sp|Q3SX40|PDLI7_BOVIN	PDZ and LIM domain protein 7 OS=Bos taurus GN=PDLIM7 PE=2 SV=1
	sp|Q0VC82|SPS1_BOVIN	Selenide, water dikinase 1 OS=Bos taurus GN=SEPHS1 PE=2 SV=1
	sp|Q5E9T4|TPK1_BOVIN	Thiamin pyrophosphokinase 1 OS=Bos taurus GN=TPK1 PE=2 SV=1
	sp|Q95KU9|NEMO_BOVIN	NF-kappa-B essential modulator OS=Bos taurus GN=IKBKG PE=1 SV=1
	sp|P63165|SUMO1_HUMAN	Small ubiquitin-related modifier 1 OS=Homo sapiens GN=SUMO1 PE=1 SV=1
	sp|Q3SZM5|NEUA_BOVIN	N-acylneuraminate cytidylyltransferase OS=Bos taurus GN=CMAS PE=2 SV=1
	sp|Q9N179|41_BOVIN	Protein 4.1 OS=Bos taurus GN=EPB41 PE=2 SV=1
	sp|Q5EA53|T2FA_BOVIN	General transcription factor IIF subunit 1 OS=Bos taurus GN=GTF2F1 PE=2 SV=1
	tr|F1N2K1|F1N2K1_BOVIN	Uncharacterized protein OS=Bos taurus GN=PCYOX1 PE=4 SV=2
	tr|G3MZF7|G3MZF7_BOVIN	Uncharacterized protein OS=Bos taurus GN=UBFD1 PE=4 SV=1
	tr|F1MQ43|F1MQ43_BOVIN	Uncharacterized protein OS=Bos taurus GN=DOCK9 PE=4 SV=2
	tr|F1MJX4|F1MJX4_BOVIN	Uncharacterized protein OS=Bos taurus GN=SKIV2L2 PE=4 SV=2
	tr|E1BIT9|E1BIT9_BOVIN	Uncharacterized protein OS=Bos taurus GN=FUT11 PE=3 SV=1
	tr|E1BMD1|E1BMD1_BOVIN	Uncharacterized protein OS=Bos taurus GN=WDR96 PE=4 SV=2
	tr|E1BPQ8|E1BPQ8_BOVIN	Uncharacterized protein OS=Bos taurus GN=CDC73 PE=4 SV=1
	tr|F1MRU4|F1MRU4_BOVIN	Uncharacterized protein OS=Bos taurus GN=DNAH3 PE=4 SV=2
	sp|E1BBQ2|GP158_BOVIN	Probable G-protein coupled receptor 158 OS=Bos taurus GN=GPR158 PE=3 SV=2
	REVERSE_tr|Q59A29|Q59A29_BOVIN-R	DONSON protein OS=Bos taurus GN=donson PE=2 SV=1
	tr|F1MKA1|F1MKA1_BOVIN	Uncharacterized protein OS=Bos taurus GN=NEMF PE=4 SV=2
	sp|Q2TA45|AGFG1_BOVIN	Arf-GAP domain and FG repeat-containing protein 1 OS=Bos taurus GN=AGFG1 PE=2 SV=1
	tr|F1MDU7|F1MDU7_BOVIN	DNA topoisomerase 2 OS=Bos taurus GN=TOP2A PE=3 SV=2
	sp|Q2HJH6|SNR40_BOVIN	U5 small nuclear ribonucleoprotein 40 kDa protein OS=Bos taurus GN=SNRNP40 PE=2 SV=1
	tr|F1MI03|F1MI03_BOVIN	Uncharacterized protein OS=Bos taurus GN=SRRM2 PE=2 SV=1
	REVERSE_tr|F1MYY8|F1MYY8_BOVIN-R	Uncharacterized protein OS=Bos taurus GN=GTF3C5 PE=4 SV=2
	tr|Q1LZF9|Q1LZF9_BOVIN	Myosin regulatory light polypeptide 9 OS=Bos taurus GN=MYL9 PE=2 SV=1
	tr|Q0VCW2|Q0VCW2_BOVIN	Abl-interactor 1 OS=Bos taurus GN=ABI1 PE=2 SV=1
	tr|F1MIZ9|F1MIZ9_BOVIN	Importin subunit alpha OS=Bos taurus GN=KPNA3 PE=3 SV=2
	sp|Q3T0N5|MK13_BOVIN	Mitogen-activated protein kinase 13 OS=Bos taurus GN=MAPK13 PE=2 SV=1
	tr|A5D7Q4|A5D7Q4_BOVIN	CSDA protein OS=Bos taurus GN=CSDA PE=2 SV=1
	tr|G3N0R2|G3N0R2_BOVIN	Uncharacterized protein OS=Bos taurus PE=4 SV=1
	sp|Q08DY9|CASP3_BOVIN	Caspase-3 OS=Bos taurus GN=CASP3 PE=2 SV=1
	tr|G3X7W8|G3X7W8_BOVIN	Uncharacterized protein (Fragment) OS=Bos taurus GN=KRT16 PE=4 SV=1
	sp|P48035|FABP4_BOVIN	Fatty acid-binding protein, adipocyte OS=Bos taurus GN=FABP4 PE=2 SV=2
	sp|Q2KJB1|SEP10_BOVIN	Septin-10 OS=Bos taurus GN=SEPT10 PE=2 SV=1
	tr|A5D784|A5D784_BOVIN	CPNE8 protein OS=Bos taurus GN=CPNE8 PE=2 SV=1
	sp|Q1LZD9|PSPC1_BOVIN	Paraspeckle component 1 OS=Bos taurus GN=PSPC1 PE=2 SV=1
	tr|E1B9T9|E1B9T9_BOVIN	Uncharacterized protein OS=Bos taurus GN=DDI2 PE=4 SV=2
	sp|Q1JP73|CI064_BOVIN	UPF0553 protein C9orf64 homolog OS=Bos taurus PE=2 SV=1
	sp|A2VDY3|CHM4A_BOVIN	Charged multivesicular body protein 4a OS=Bos taurus GN=CHMP4A PE=2 SV=1
	sp|A5D7H2|STRN3_BOVIN	Striatin-3 OS=Bos taurus GN=STRN3 PE=2 SV=1
	sp|A5PJI7|EI2BG_BOVIN	Translation initiation factor eIF-2B subunit gamma OS=Bos taurus GN=EIF2B3 PE=2 SV=1
	sp|A5PJS6|UBP10_BOVIN	Ubiquitin carboxyl-terminal hydrolase 10 OS=Bos taurus GN=USP10 PE=2 SV=1
	sp|O02703|BAX_BOVIN	Apoptosis regulator BAX OS=Bos taurus GN=BAX PE=2 SV=1
	sp|P00126|QCR6_BOVIN	Cytochrome b-c1 complex subunit 6, mitochondrial OS=Bos taurus GN=UQCRH PE=1 SV=2
	sp|P04815|BPT2_BOVIN	Spleen trypsin inhibitor I OS=Bos taurus PE=1 SV=2
	sp|P09851|RASA1_BOVIN	Ras GTPase-activating protein 1 OS=Bos taurus GN=RASA1 PE=1 SV=1
	sp|P20427|CSK22_BOVIN	Casein kinase II subunit alpha' OS=Bos taurus GN=CSNK2A2 PE=1 SV=3
	sp|Q0IIF2|EI2BA_BOVIN	Translation initiation factor eIF-2B subunit alpha OS=Bos taurus GN=EIF2B1 PE=2 SV=1
	sp|Q0VBZ0|CSK_BOVIN	Tyrosine-protein kinase CSK OS=Bos taurus GN=CSK PE=2 SV=1
	sp|Q0VC92|MGN2_BOVIN	Protein mago nashi homolog 2 OS=Bos taurus GN=MAGOHB PE=2 SV=1
	sp|Q148I1|PAAF1_BOVIN	Proteasomal ATPase-associated factor 1 OS=Bos taurus GN=PAAF1 PE=2 SV=1
	sp|Q29RM3|REEP5_BOVIN	Receptor expression-enhancing protein 5 OS=Bos taurus GN=REEP5 PE=2 SV=1
	sp|Q2HJH9|PDCD5_BOVIN	Programmed cell death protein 5 OS=Bos taurus GN=PDCD5 PE=2 SV=3
	sp|Q2KI56|CSN7B_BOVIN	COP9 signalosome complex subunit 7b OS=Bos taurus GN=COPS7B PE=2 SV=1
	sp|Q2KIG2|WDR5_BOVIN	WD repeat-containing protein 5 OS=Bos taurus GN=WDR5 PE=2 SV=1
	sp|Q2KJC8|FKBP9_BOVIN	Peptidyl-prolyl cis-trans isomerase FKBP9 OS=Bos taurus GN=FKBP9 PE=2 SV=1
	sp|Q2NL05|KIF2A_BOVIN	Kinesin-like protein KIF2A OS=Bos taurus GN=KIF2A PE=2 SV=1
	sp|Q2TBV6|CC124_BOVIN	Coiled-coil domain-containing protein 124 OS=Bos taurus GN=CCDC124 PE=2 SV=1
	sp|Q3SWY2|ILK_BOVIN	Integrin-linked protein kinase OS=Bos taurus GN=ILK PE=2 SV=1
	sp|Q3SZY7|ZFAN6_BOVIN	AN1-type zinc finger protein 6 OS=Bos taurus GN=ZFAND6 PE=2 SV=1
	sp|Q3ZBK6|LSM4_BOVIN	U6 snRNA-associated Sm-like protein LSm4 OS=Bos taurus GN=LSM4 PE=2 SV=1
	sp|Q3ZCL3|NMI_BOVIN	N-myc-interactor OS=Bos taurus GN=NMI PE=2 SV=1
	sp|Q58DU8|NR2CA_BOVIN	Nuclear receptor 2C2-associated protein OS=Bos taurus GN=NR2C2AP PE=2 SV=1
	sp|Q5E9N0|BYST_BOVIN	Bystin OS=Bos taurus GN=BYSL PE=2 SV=1
	sp|Q6EWQ6|DHYS_BOVIN	Deoxyhypusine synthase OS=Bos taurus GN=DHPS PE=2 SV=2
	sp|Q8HXY9|CFDP1_BOVIN	Craniofacial development protein 1 OS=Bos taurus GN=CFDP1 PE=2 SV=1
	sp|Q8MJJ7|DCPS_BOVIN	m7GpppX diphosphatase OS=Bos taurus GN=DCPS PE=2 SV=1
	sp|Q9XSC3|WDR44_BOVIN	WD repeat-containing protein 44 OS=Bos taurus GN=WDR44 PE=1 SV=1
	tr|A4FV74|A4FV74_BOVIN	COPS8 protein OS=Bos taurus GN=COPS8 PE=2 SV=1
	tr|A4IFJ8|A4IFJ8_BOVIN	ACTL6A protein OS=Bos taurus GN=ACTL6A PE=2 SV=1
	tr|A5PJD6|A5PJD6_BOVIN	ATL3 protein OS=Bos taurus GN=ATL3 PE=2 SV=1
	tr|A5PK70|A5PK70_BOVIN	Nucleoside diphosphate kinase OS=Bos taurus GN=NME3 PE=2 SV=1
	tr|A6H788|A6H788_BOVIN	SNRPA1 protein OS=Bos taurus GN=SNRPA1 PE=2 SV=1
	tr|A7YWH2|A7YWH2_BOVIN	Zinc finger Ran-binding domain-containing protein 2 OS=Bos taurus GN=ZRANB2 PE=2 SV=1
	tr|E1B8X4|E1B8X4_BOVIN	Uncharacterized protein OS=Bos taurus GN=NAE1 PE=4 SV=1
	tr|E1BBI8|E1BBI8_BOVIN	Uncharacterized protein OS=Bos taurus GN=DCTN4 PE=4 SV=2
	tr|E1BDS6|E1BDS6_BOVIN	Uncharacterized protein OS=Bos taurus GN=TP53BP1 PE=4 SV=1
	tr|E1BFZ3|E1BFZ3_BOVIN	Uncharacterized protein OS=Bos taurus GN=SMEK2 PE=4 SV=2
	tr|E1BJQ7|E1BJQ7_BOVIN	Uncharacterized protein OS=Bos taurus GN=GIPC1 PE=4 SV=1
	tr|E1BKC9|E1BKC9_BOVIN	Galectin OS=Bos taurus GN=LGALSL PE=4 SV=1
	tr|E1BKZ1|E1BKZ1_BOVIN	Uncharacterized protein (Fragment) OS=Bos taurus GN=GSR PE=4 SV=2
	tr|E1BMZ9|E1BMZ9_BOVIN	Structural maintenance of chromosomes protein OS=Bos taurus GN=SMC4 PE=2 SV=2
	tr|E1BPW2|E1BPW2_BOVIN	Uncharacterized protein OS=Bos taurus GN=ERC1 PE=4 SV=2
	tr|F1MC10|F1MC10_BOVIN	Uncharacterized protein (Fragment) OS=Bos taurus GN=LEPREL4 PE=4 SV=2
	tr|F1MD79|F1MD79_BOVIN	Uncharacterized protein (Fragment) OS=Bos taurus GN=ANKFY1 PE=4 SV=2
	tr|F1MDD8|F1MDD8_BOVIN	Uncharacterized protein (Fragment) OS=Bos taurus GN=ATF6 PE=4 SV=2
	tr|F1MHJ5|F1MHJ5_BOVIN	Uncharacterized protein (Fragment) OS=Bos taurus GN=SNX6 PE=2 SV=2
	tr|F1MJ09|F1MJ09_BOVIN	E3 ubiquitin-protein ligase (Fragment) OS=Bos taurus GN=NEDD4L PE=4 SV=1
	tr|F1MJ70|F1MJ70_BOVIN	Uncharacterized protein (Fragment) OS=Bos taurus GN=HSPA12A PE=4 SV=2
	tr|F1MJ80|F1MJ80_BOVIN	Uncharacterized protein OS=Bos taurus GN=NAMPT PE=2 SV=1
[truncated: 89 more rows]

## Sheet: OF
	OF: Total proteins identified
	Accession	Protein Name
	tr|Q8SQ28|Q8SQ28_BOVIN	Serum amyloid A protein OS=Bos taurus GN=Saa3 PE=2 SV=1
	tr|Q861S4|Q861S4_BOVIN	Similar to ribosomal protein L21 (Fragment) OS=Bos taurus GN=RPL21 PE=2 SV=1
	tr|Q6QRN7|Q6QRN7_BOVIN	PP1201 protein OS=Bos taurus GN=RECS1 PE=2 SV=1
	tr|Q5GF34|Q5GF34_BOVIN	UBA7 protein OS=Bos taurus GN=UBA7 PE=2 SV=1
	tr|Q5E9F1|Q5E9F1_BOVIN	B-cell receptor-associated protein 31 OS=Bos taurus GN=BCAP31 PE=2 SV=1
	tr|Q5E970|Q5E970_BOVIN	DEAD (Asp-Glu-Ala-Asp) box polypeptide 39 isoform 1 OS=Bos taurus GN=DDX39 PE=2 SV=1
	tr|Q58DQ0|Q58DQ0_BOVIN	Arsenic (+3 oxidation state) methyltransferase OS=Bos taurus GN=AS3MT PE=2 SV=1
	tr|Q58DP6|Q58DP6_BOVIN	Ribonuclease 4 OS=Bos taurus GN=RNASE4 PE=2 SV=1
	tr|Q58DL9|Q58DL9_BOVIN	Phospholipid transfer protein OS=Bos taurus GN=PLTP PE=2 SV=1
	tr|Q56JY8|Q56JY8_BOVIN	Btf3 protein OS=Bos taurus GN=BTF3 PE=2 SV=1
	tr|Q3ZCI4|Q3ZCI4_BOVIN	6-phosphogluconate dehydrogenase, decarboxylating OS=Bos taurus GN=PGD PE=2 SV=2
	tr|Q3ZCA7|Q3ZCA7_BOVIN	Guanine nucleotide binding protein (G protein), alpha inhibiting activity polypeptide 3 OS=Bos taurus GN=GNAI3 PE=2 SV=1
	tr|Q3ZC32|Q3ZC32_BOVIN	Optineurin OS=Bos taurus GN=OPTN PE=2 SV=1
	tr|Q3ZBY4|Q3ZBY4_BOVIN	Fructose-bisphosphate aldolase OS=Bos taurus GN=ALDOC PE=2 SV=2
	tr|Q3ZBX5|Q3ZBX5_BOVIN	Small inducible cytokine subfamily E, member 1 (Endothelial monocyte-activating) OS=Bos taurus GN=SCYE1 PE=2 SV=2
	tr|Q3ZBH5|Q3ZBH5_BOVIN	Proliferation-associated 2G4, 38kDa OS=Bos taurus GN=PA2G4 PE=2 SV=1
	tr|Q3ZBH2|Q3ZBH2_BOVIN	NAD(P)H dehydrogenase, quinone 1 OS=Bos taurus GN=NQO1 PE=2 SV=1
	tr|Q3ZBG1|Q3ZBG1_BOVIN	RAB14 protein OS=Bos taurus GN=RAB14 PE=2 SV=2
	tr|Q3T105|Q3T105_BOVIN	GALE protein OS=Bos taurus GN=GALE PE=2 SV=2
	tr|Q3T0Y1|Q3T0Y1_BOVIN	OTU domain, ubiquitin aldehyde binding 1 OS=Bos taurus GN=OTUB1 PE=2 SV=1
	tr|Q3T0S7|Q3T0S7_BOVIN	Chromosome 14 open reading frame 166 ortholog OS=Bos taurus GN=C10H14ORF166 PE=2 SV=1
	tr|Q3T0G3|Q3T0G3_BOVIN	AHA1, activator of heat shock 90kDa protein ATPase homolog 1 (Yeast) OS=Bos taurus GN=AHSA1 PE=2 SV=1
	tr|Q3T076|Q3T076_BOVIN	Ribosomal protein S14 OS=Bos taurus GN=RPS14 PE=2 SV=1
	tr|Q3T010|Q3T010_BOVIN	Phosphatidylethanolamine-binding protein 4 OS=Bos taurus GN=PEBP4 PE=2 SV=1
	tr|Q3SZH5|Q3SZH5_BOVIN	Angiotensinogen OS=Bos taurus GN=AGT PE=2 SV=1
	tr|Q3SZA6|Q3SZA6_BOVIN	Syndecan binding protein (Syntenin) OS=Bos taurus GN=SDCBP PE=2 SV=1
	tr|Q3SZ32|Q3SZ32_BOVIN	Elongin B OS=Bos taurus GN=TCEB2 PE=4 SV=1
	tr|Q3SZ15|Q3SZ15_BOVIN	Eukaryotic translation elongation factor 1 epsilon 1 OS=Bos taurus GN=EEF1E1 PE=2 SV=1
	tr|Q3SYW7|Q3SYW7_BOVIN	SPARC-like 1 (Hevin) OS=Bos taurus GN=SPARCL1 PE=2 SV=1
	tr|Q3SYT9|Q3SYT9_BOVIN	Poly(RC) binding protein 2 OS=Bos taurus GN=PCBP2 PE=2 SV=1
	tr|Q3SYR8|Q3SYR8_BOVIN	Immunoglobulin J chain OS=Bos taurus GN=IGJ PE=2 SV=1
	tr|Q3SX33|Q3SX33_BOVIN	Thy-1 cell surface antigen OS=Bos taurus GN=THY1 PE=2 SV=1
	tr|Q3SX32|Q3SX32_BOVIN	Perilipin OS=Bos taurus GN=M6PRBP1 PE=2 SV=1
	tr|Q3MHG3|Q3MHG3_BOVIN	Sulfurtransferase OS=Bos taurus GN=MPST PE=2 SV=1
	tr|Q32PA1|Q32PA1_BOVIN	CD59 molecule, complement regulatory protein OS=Bos taurus GN=CD59 PE=2 SV=1
	tr|Q32LH2|Q32LH2_BOVIN	Centrin 4 OS=Bos taurus GN=CETN4 PE=2 SV=1
	tr|Q32LF7|Q32LF7_BOVIN	UDP-Gal:betaGlcNAc beta 1,4-galactosyltransferase, polypeptide 4 OS=Bos taurus GN=B4GALT4 PE=2 SV=1
	tr|Q32LC3|Q32LC3_BOVIN	Eukaryotic translation initiation factor 1A, X-linked OS=Bos taurus GN=EIF1AX PE=2 SV=1
	tr|Q32L46|Q32L46_BOVIN	5'-nucleotidase, cytosolic III OS=Bos taurus GN=NT5C3 PE=2 SV=1
	tr|Q32KU8|Q32KU8_BOVIN	NudC domain containing 2 OS=Bos taurus GN=NUDCD2 PE=2 SV=1
	tr|Q2T9M8|Q2T9M8_BOVIN	Synaptosomal-associated protein OS=Bos taurus GN=SNAP23 PE=2 SV=1
	tr|Q2NKU4|Q2NKU4_BOVIN	Calcium regulated heat stable protein 1, 24kDa OS=Bos taurus GN=CARHSP1 PE=2 SV=1
	tr|Q2LGB8|Q2LGB8_BOVIN	Caspase 8 OS=Bos taurus GN=CASP8 PE=2 SV=1
	tr|Q2KJE7|Q2KJE7_BOVIN	Proteasome (Prosome, macropain) activator subunit 1 (PA28 alpha) OS=Bos taurus GN=PSME1 PE=2 SV=1
	tr|Q2KJ86|Q2KJ86_BOVIN	Haloacid dehalogenase-like hydrolase domain containing 1A OS=Bos taurus GN=HDHD1A PE=2 SV=1
	tr|Q2KJ41|Q2KJ41_BOVIN	Tetraspanin 14 OS=Bos taurus GN=TSPAN14 PE=2 SV=1
	tr|Q2KJ23|Q2KJ23_BOVIN	Bridging integrator 1 OS=Bos taurus GN=BIN1 PE=2 SV=1
	tr|Q2KIW4|Q2KIW4_BOVIN	Lecithin-cholesterol acyltransferase OS=Bos taurus GN=LCAT PE=2 SV=1
	tr|Q2KIW1|Q2KIW1_BOVIN	Paraoxonase 1 OS=Bos taurus GN=PON1 PE=2 SV=1
	tr|Q2KIT8|Q2KIT8_BOVIN	Tissue specific transplantation antigen P35B OS=Bos taurus GN=TSTA3 PE=2 SV=1
	tr|Q2KII3|Q2KII3_BOVIN	Hepatitis A virus cellular receptor 1 N-terminal domain containing protein OS=Bos taurus GN=MGC137099 PE=2 SV=1
	tr|Q2KIF2|Q2KIF2_BOVIN	Leucine-rich alpha-2-glycoprotein 1 OS=Bos taurus GN=LRG1 PE=2 SV=1
	tr|Q2KIC7|Q2KIC7_BOVIN	PPP6C protein OS=Bos taurus GN=PPP6C PE=2 SV=2
	tr|Q2KI86|Q2KI86_BOVIN	Replication protein A2, 32kDa OS=Bos taurus GN=RPA2 PE=2 SV=1
	tr|Q2KI59|Q2KI59_BOVIN	Proteasome (Prosome, macropain) 26S subunit, non-ATPase, 10 OS=Bos taurus GN=PSMD10 PE=2 SV=1
	tr|Q2KI57|Q2KI57_BOVIN	Transportin 2 OS=Bos taurus GN=TNPO2 PE=2 SV=1
	tr|Q2HJ26|Q2HJ26_BOVIN	Phosphoribosylaminoimidazole carboxylase, phosphoribosylaminoimidazole succinocarboxamide synthetase OS=Bos taurus GN=PAICS PE=2 SV=1
	tr|Q24K01|Q24K01_BOVIN	NudC domain containing 3 OS=Bos taurus GN=NUDCD3 PE=2 SV=1
	tr|Q1RMX7|Q1RMX7_BOVIN	N-acetylneuraminic acid synthase OS=Bos taurus GN=NANS PE=2 SV=1
	tr|Q1RMW4|Q1RMW4_BOVIN	Adaptor protein, phosphotyrosine interaction, PH domain and leucine zipper containing 2 OS=Bos taurus GN=APPL2 PE=2 SV=1
	tr|Q1RMV5|Q1RMV5_BOVIN	Chromosome 5 open reading frame 22 ortholog OS=Bos taurus GN=C20H5ORF22 PE=2 SV=1
	tr|Q1RMR9|Q1RMR9_BOVIN	Protein kinase C and casein kinase substrate in neurons 2 OS=Bos taurus GN=PACSIN2 PE=2 SV=1
	tr|Q1RMR3|Q1RMR3_BOVIN	Cortactin OS=Bos taurus GN=CTTN PE=2 SV=1
	tr|Q1RMM2|Q1RMM2_BOVIN	Lymphocyte antigen 6 complex, locus E OS=Bos taurus GN=LY6E PE=2 SV=1
	tr|Q1RMH5|Q1RMH5_BOVIN	C1QC protein (Fragment) OS=Bos taurus GN=C1QC PE=2 SV=1
	tr|Q1LZ72|Q1LZ72_BOVIN	Canopy 2 homolog (Zebrafish) OS=Bos taurus GN=CNPY2 PE=2 SV=1
	tr|Q17QP9|Q17QP9_BOVIN	Proteasome (Prosome, macropain) 26S subunit, non-ATPase, 14 OS=Bos taurus GN=PSMD14 PE=2 SV=1
	tr|Q17QI3|Q17QI3_BOVIN	Acetyl-Coenzyme A acetyltransferase 2 OS=Bos taurus GN=ACAT2 PE=2 SV=1
	tr|Q17QH1|Q17QH1_BOVIN	APOF protein OS=Bos taurus GN=APOF PE=2 SV=2
	tr|Q17QC8|Q17QC8_BOVIN	Complement factor properdin OS=Bos taurus GN=CFP PE=2 SV=1
	tr|Q148G9|Q148G9_BOVIN	LSM6 homolog, U6 small nuclear RNA associated (S. cerevisiae) OS=Bos taurus GN=LSM6 PE=4 SV=1
	tr|Q148D3|Q148D3_BOVIN	Fumarate hydratase OS=Bos taurus GN=FH PE=2 SV=1
	tr|Q0VD49|Q0VD49_BOVIN	Histone deacetylase 10 OS=Bos taurus GN=HDAC10 PE=2 SV=1
	tr|Q0VD16|Q0VD16_BOVIN	MAP2K1 protein OS=Bos taurus GN=MAP2K1 PE=2 SV=2
	tr|Q0VCY8|Q0VCY8_BOVIN	Phosphoprotein enriched in astrocytes 15 OS=Bos taurus GN=PEA15 PE=2 SV=1
	tr|Q0VC96|Q0VC96_BOVIN	Thymocyte nuclear protein 1 OS=Bos taurus GN=THYN1 PE=2 SV=1
	tr|Q0VC51|Q0VC51_BOVIN	Interleukin 1 receptor accessory protein OS=Bos taurus GN=IL1RAP PE=2 SV=1
	tr|Q0VBY4|Q0VBY4_BOVIN	Tumor protein D52-like 1 OS=Bos taurus GN=TPD52L1 PE=2 SV=1
	tr|Q0V7N2|Q0V7N2_BOVIN	Complement C2 OS=Bos taurus GN=C2 PE=2 SV=1
	tr|Q0P5E0|Q0P5E0_BOVIN	Lymphocyte-specific protein 1 OS=Bos taurus GN=LSP1 PE=2 SV=1
	tr|Q0P5D6|Q0P5D6_BOVIN	Retinoic acid receptor responder (Tazarotene induced) 1 OS=Bos taurus GN=RARRES1 PE=2 SV=1
	tr|Q0P592|Q0P592_BOVIN	Fructosamine 3 kinase related protein OS=Bos taurus GN=FN3KRP PE=2 SV=1
	tr|Q0P568|Q0P568_BOVIN	Ubiquitin fusion degradation 1 like OS=Bos taurus GN=UFD1L PE=2 SV=1
	tr|Q0IIM6|Q0IIM6_BOVIN	Ubiquitin carboxyl-terminal hydrolase OS=Bos taurus GN=USP8 PE=2 SV=1
	tr|Q0IIH5|Q0IIH5_BOVIN	Nucleobindin 2 OS=Bos taurus GN=NUCB2 PE=2 SV=1
	tr|Q08E32|Q08E32_BOVIN	CHMP4B protein OS=Bos taurus GN=CHMP4B PE=2 SV=2
	tr|Q08DV2|Q08DV2_BOVIN	Glucosamine-phosphate N-acetyltransferase 1 OS=Bos taurus GN=GNPNAT1 PE=2 SV=1
	tr|Q08DB4|Q08DB4_BOVIN	Copine I OS=Bos taurus GN=CPNE1 PE=2 SV=1
	tr|Q05B69|Q05B69_BOVIN	NEDD8 ultimate buster 1 OS=Bos taurus GN=NUB1 PE=2 SV=1
	tr|H7BWW0|H7BWW0_BOVIN	Coronin OS=Bos taurus GN=CORO1B PE=2 SV=1
	tr|G8JL06|G8JL06_BOVIN	Histone H2B OS=Bos taurus GN=HIST1H2BB PE=3 SV=1
	tr|G8JKV5|G8JKV5_BOVIN	60S ribosomal protein L14 OS=Bos taurus GN=RPL14 PE=2 SV=1
	tr|G5E630|G5E630_BOVIN	Ubiquitin carboxyl-terminal hydrolase OS=Bos taurus GN=USP9X PE=3 SV=1
	tr|G5E5C8|G5E5C8_BOVIN	Transaldolase OS=Bos taurus GN=TALDO1 PE=2 SV=1
	tr|G5E589|G5E589_BOVIN	Proteasome subunit beta type OS=Bos taurus GN=PSMB1 PE=3 SV=1
	tr|G5E567|G5E567_BOVIN	Uncharacterized protein (Fragment) OS=Bos taurus GN=IPO9 PE=4 SV=1
	tr|G5E531|G5E531_BOVIN	T-complex protein 1 subunit alpha OS=Bos taurus GN=TCP1 PE=3 SV=1
	tr|G3X7D2|G3X7D2_BOVIN	Chitinase-3-like protein 1 OS=Bos taurus GN=CHI3L1 PE=3 SV=1
	tr|G3X757|G3X757_BOVIN	Transitional endoplasmic reticulum ATPase OS=Bos taurus GN=VCP PE=4 SV=1
	tr|G3X746|G3X746_BOVIN	Uncharacterized protein (Fragment) OS=Bos taurus GN=CABIN1 PE=4 SV=1
	tr|G3N3D4|G3N3D4_BOVIN	Uncharacterized protein OS=Bos taurus GN=KCTD12 PE=4 SV=1
	tr|G3N314|G3N314_BOVIN	Uncharacterized protein (Fragment) OS=Bos taurus GN=HEATR2 PE=4 SV=1
	tr|G3N2V5|G3N2V5_BOVIN	Heat shock protein HSP 90-beta OS=Bos taurus GN=HSP90AB1 PE=3 SV=1
	tr|G3N2H7|G3N2H7_BOVIN	Uncharacterized protein OS=Bos taurus GN=LOC786628 PE=4 SV=1
	tr|G3N2F0|G3N2F0_BOVIN	Elongation factor 1-alpha OS=Bos taurus PE=3 SV=1
	tr|G3N0T0|G3N0T0_BOVIN	Uncharacterized protein OS=Bos taurus GN=LOC510369 PE=4 SV=1
	tr|G3MZZ0|G3MZZ0_BOVIN	Glutathione peroxidase (Fragment) OS=Bos taurus GN=GPX2 PE=3 SV=1
	tr|G3MZC1|G3MZC1_BOVIN	5'-nucleotidase (Fragment) OS=Bos taurus GN=NT5E PE=4 SV=1
	tr|G3MYC1|G3MYC1_BOVIN	Uncharacterized protein OS=Bos taurus PE=3 SV=1
	tr|G3MY87|G3MY87_BOVIN	Uncharacterized protein OS=Bos taurus GN=MGAM PE=4 SV=1
	tr|G3MY23|G3MY23_BOVIN	Uncharacterized protein OS=Bos taurus GN=PARK2 PE=4 SV=1
	tr|G3MY14|G3MY14_BOVIN	Uncharacterized protein (Fragment) OS=Bos taurus GN=PRPS2 PE=4 SV=1
	tr|G3MXM1|G3MXM1_BOVIN	60S ribosomal protein L13a (Fragment) OS=Bos taurus GN=RPL13A PE=4 SV=1
	tr|G1K122|G1K122_BOVIN	Retinol-binding protein 4 OS=Bos taurus GN=RBP4 PE=2 SV=1
	tr|F6S1Q0|F6S1Q0_BOVIN	Uncharacterized protein OS=Bos taurus GN=KRT18 PE=2 SV=1
	tr|F6RM11|F6RM11_BOVIN	Uncharacterized protein OS=Bos taurus GN=NPTN PE=4 SV=1
	tr|F6QVC9|F6QVC9_BOVIN	Annexin OS=Bos taurus GN=ANXA5 PE=2 SV=1
	tr|F6QHN4|F6QHN4_BOVIN	Prolyl endopeptidase (Fragment) OS=Bos taurus GN=PREP PE=4 SV=1
	tr|F6QEL0|F6QEL0_BOVIN	Cystatin-B OS=Bos taurus GN=CST6 PE=4 SV=1
	tr|F6Q751|F6Q751_BOVIN	Uncharacterized protein OS=Bos taurus GN=GSTM2 PE=2 SV=1
	tr|F6Q0Z5|F6Q0Z5_BOVIN	Uncharacterized protein OS=Bos taurus GN=LRRC57 PE=2 SV=1
	tr|F6Q087|F6Q087_BOVIN	G1 to S phase transition 1 OS=Bos taurus GN=GSPT1 PE=4 SV=1
	tr|F2Z4J5|F2Z4J5_BOVIN	Eukaryotic translation initiation factor 3 subunit G OS=Bos taurus GN=EIF3G PE=3 SV=1
	tr|F2Z4J1|F2Z4J1_BOVIN	Histone H2A OS=Bos taurus GN=HIST1H2AC PE=3 SV=1
	tr|F2Z4D5|F2Z4D5_BOVIN	Ras-related protein Rab-11A OS=Bos taurus GN=RAB11A PE=3 SV=1
	tr|F1N7X5|F1N7X5_BOVIN	Uncharacterized protein (Fragment) OS=Bos taurus GN=AQP9 PE=3 SV=2
	tr|F1N7X3|F1N7X3_BOVIN	Nucleosome assembly protein 1-like 4 OS=Bos taurus GN=NAP1L4 PE=3 SV=1
	tr|F1N7M6|F1N7M6_BOVIN	Uncharacterized protein (Fragment) OS=Bos taurus GN=CEP85 PE=4 SV=1
	tr|F1N7H5|F1N7H5_BOVIN	Mannose-1-phosphate guanyltransferase beta OS=Bos taurus GN=GMPPB PE=4 SV=2
	tr|F1N7D7|F1N7D7_BOVIN	Dystroglycan OS=Bos taurus GN=DAG1 PE=4 SV=1
	tr|F1N782|F1N782_BOVIN	Complex III assembly factor LYRM7 OS=Bos taurus GN=LYRM7 PE=4 SV=1
	tr|F1N734|F1N734_BOVIN	Uncharacterized protein (Fragment) OS=Bos taurus GN=CHD6 PE=4 SV=2
	tr|F1N719|F1N719_BOVIN	Serine/threonine-protein phosphatase OS=Bos taurus GN=PPP5C PE=2 SV=1
	tr|F1N6W2|F1N6W2_BOVIN	Uncharacterized protein OS=Bos taurus GN=PPIL4 PE=2 SV=1
	tr|F1N6I5|F1N6I5_BOVIN	Versican core protein OS=Bos taurus GN=VCAN PE=2 SV=1
	tr|F1N6E0|F1N6E0_BOVIN	Uncharacterized protein OS=Bos taurus GN=OAS1Z PE=2 SV=2
	tr|F1N647|F1N647_BOVIN	Fatty acid synthase OS=Bos taurus GN=FASN PE=4 SV=2
	tr|F1N619|F1N619_BOVIN	Cadherin-1 (Fragment) OS=Bos taurus GN=CDH1 PE=2 SV=2
	tr|F1N5Z0|F1N5Z0_BOVIN	Uncharacterized protein OS=Bos taurus GN=AQP5 PE=3 SV=2
	tr|F1N5M2|F1N5M2_BOVIN	Vitamin D-binding protein OS=Bos taurus GN=GC PE=4 SV=2
	tr|F1N5I0|F1N5I0_BOVIN	Uncharacterized protein (Fragment) OS=Bos taurus GN=LYPD6B PE=4 SV=1
	tr|F1N5F7|F1N5F7_BOVIN	Eukaryotic translation initiation factor 3 subunit M OS=Bos taurus GN=EIF3M PE=3 SV=1
	tr|F1N596|F1N596_BOVIN	Uncharacterized protein OS=Bos taurus GN=CLK1 PE=4 SV=1
	tr|F1N594|F1N594_BOVIN	Uncharacterized protein OS=Bos taurus GN=RTDR1 PE=4 SV=2
	tr|F1N4W4|F1N4W4_BOVIN	Membrane cofactor protein OS=Bos taurus GN=CD46 PE=2 SV=2
	tr|F1N4R4|F1N4R4_BOVIN	dCTP pyrophosphatase 1 OS=Bos taurus GN=DCTPP1 PE=4 SV=1
	tr|F1N4A1|F1N4A1_BOVIN	Uncharacterized protein (Fragment) OS=Bos taurus GN=ARMC12 PE=4 SV=1
	tr|F1N458|F1N458_BOVIN	Uncharacterized protein (Fragment) OS=Bos taurus GN=ARHGAP17 PE=4 SV=1
	tr|F1N430|F1N430_BOVIN	Metalloproteinase inhibitor 2 OS=Bos taurus GN=TIMP2 PE=2 SV=1
	tr|F1N401|F1N401_BOVIN	Collagen alpha-1(XII) chain OS=Bos taurus GN=COL12A1 PE=2 SV=2
	tr|F1N3V0|F1N3V0_BOVIN	Malic enzyme OS=Bos taurus GN=ME1 PE=3 SV=2
	tr|F1N3S4|F1N3S4_BOVIN	Uncharacterized protein (Fragment) OS=Bos taurus GN=CUL4A PE=3 SV=2
	tr|F1N3Q7|F1N3Q7_BOVIN	Apolipoprotein A-IV OS=Bos taurus GN=APOA4 PE=3 SV=1
	tr|F1N3P2|F1N3P2_BOVIN	Ubiquitin carboxyl-terminal hydrolase OS=Bos taurus GN=USP5 PE=3 SV=2
	tr|F1N2A2|F1N2A2_BOVIN	Serpin B6 OS=Bos taurus GN=SERPINB6 PE=3 SV=2
	tr|F1N1X8|F1N1X8_BOVIN	Uncharacterized protein OS=Bos taurus GN=UBE2Z PE=2 SV=1
	tr|F1N1K6|F1N1K6_BOVIN	Uncharacterized protein (Fragment) OS=Bos taurus GN=DNHD1 PE=4 SV=2
	tr|F1N1I6|F1N1I6_BOVIN	Gelsolin OS=Bos taurus GN=GSN PE=2 SV=1
	tr|F1N1A3|F1N1A3_BOVIN	Uncharacterized protein OS=Bos taurus GN=UBQLN1 PE=2 SV=1
	tr|F1N161|F1N161_BOVIN	Calpastatin OS=Bos taurus GN=CAST PE=2 SV=2
	tr|F1N124|F1N124_BOVIN	Leucine-rich repeat-containing protein 23 OS=Bos taurus GN=LRRC23 PE=4 SV=2
	tr|F1N120|F1N120_BOVIN	Uncharacterized protein OS=Bos taurus GN=LXN PE=4 SV=2
	tr|F1N0T3|F1N0T3_BOVIN	Uncharacterized protein OS=Bos taurus GN=LOC404051 PE=3 SV=2
	tr|F1N0S5|F1N0S5_BOVIN	Cadherin-2 OS=Bos taurus GN=CDH2 PE=2 SV=2
	tr|F1N0E5|F1N0E5_BOVIN	T-complex protein 1 subunit delta OS=Bos taurus GN=CCT4 PE=3 SV=2
	tr|F1MZX0|F1MZX0_BOVIN	Protein kinase C delta type OS=Bos taurus GN=PRKCD PE=3 SV=1
	tr|F1MZW8|F1MZW8_BOVIN	Ribosomal protein S6 kinase OS=Bos taurus GN=RPS6KA3 PE=3 SV=1
	tr|F1MZ03|F1MZ03_BOVIN	Uncharacterized protein (Fragment) OS=Bos taurus GN=ACAP2 PE=2 SV=1
	tr|F1MYB8|F1MYB8_BOVIN	von Willebrand factor A domain-containing protein 7 OS=Bos taurus GN=VWA7 PE=4 SV=2
	tr|F1MY85|F1MY85_BOVIN	Complement C5a anaphylatoxin OS=Bos taurus GN=C5 PE=2 SV=2
	tr|F1MXU5|F1MXU5_BOVIN	Uncharacterized protein OS=Bos taurus GN=STARD10 PE=4 SV=2
	tr|F1MXH8|F1MXH8_BOVIN	Uncharacterized protein (Fragment) OS=Bos taurus GN=DMRTB1 PE=4 SV=1
	tr|F1MX63|F1MX63_BOVIN	Prolargin OS=Bos taurus GN=PRELP PE=4 SV=1
	tr|F1MWU9|F1MWU9_BOVIN	Uncharacterized protein OS=Bos taurus GN=HSPA6 PE=3 SV=2
	tr|F1MWT4|F1MWT4_BOVIN	Uncharacterized protein (Fragment) OS=Bos taurus GN=LEKR1 PE=4 SV=1
	tr|F1MWQ2|F1MWQ2_BOVIN	Annexin OS=Bos taurus GN=ANXA3 PE=3 SV=1
	tr|F1MWH2|F1MWH2_BOVIN	Adenosylhomocysteinase OS=Bos taurus GN=AHCYL1 PE=2 SV=2
	tr|F1MW00|F1MW00_BOVIN	Uncharacterized protein (Fragment) OS=Bos taurus GN=HIPK2 PE=4 SV=2
	tr|F1MV90|F1MV90_BOVIN	Uncharacterized protein OS=Bos taurus GN=LOC101906472 PE=3 SV=2
	tr|F1MV51|F1MV51_BOVIN	Uncharacterized protein OS=Bos taurus GN=APC PE=4 SV=2
	tr|F1MUZ9|F1MUZ9_BOVIN	60 kDa heat shock protein, mitochondrial OS=Bos taurus GN=HSPD1 PE=3 SV=1
	tr|F1MUK3|F1MUK3_BOVIN	Insulin-like growth factor-binding protein 6 OS=Bos taurus GN=IGFBP6 PE=4 SV=1
	tr|F1MU12|F1MU12_BOVIN	Keratin, type II cytoskeletal 8 OS=Bos taurus GN=KRT8 PE=3 SV=1
	tr|F1MTX7|F1MTX7_BOVIN	Aspartate--tRNA ligase, cytoplasmic OS=Bos taurus GN=DARS PE=3 SV=1
	tr|F1MTP5|F1MTP5_BOVIN	WD repeat-containing protein 1 OS=Bos taurus GN=WDR1 PE=4 SV=2
	tr|F1MTI7|F1MTI7_BOVIN	Protein CutA OS=Bos taurus GN=CUTA PE=2 SV=1
	tr|F1MSZ6|F1MSZ6_BOVIN	Antithrombin-III OS=Bos taurus GN=SERPINC1 PE=3 SV=1
	tr|F1MSR5|F1MSR5_BOVIN	Uncharacterized protein OS=Bos taurus GN=TBCK PE=4 SV=2
	tr|F1MSJ9|F1MSJ9_BOVIN	Uncharacterized protein OS=Bos taurus GN=RAB35 PE=3 SV=2
	tr|F1MSF1|F1MSF1_BOVIN	Ribonucleoside-diphosphate reductase OS=Bos taurus GN=RRM1 PE=3 SV=2
	tr|F1MSB5|F1MSB5_BOVIN	Uncharacterized protein OS=Bos taurus GN=GORASP2 PE=4 SV=1
	tr|F1MRG7|F1MRG7_BOVIN	Actin-related protein 2 OS=Bos taurus GN=ACTR2 PE=3 SV=2
	tr|F1MR96|F1MR96_BOVIN	Calpastatin OS=Bos taurus GN=CAST PE=2 SV=2
	tr|F1MR07|F1MR07_BOVIN	Uncharacterized protein OS=Bos taurus GN=HDDC3 PE=4 SV=2
	tr|F1MQN0|F1MQN0_BOVIN	Uncharacterized protein OS=Bos taurus GN=PPP2R1B PE=4 SV=2
	tr|F1MQJ0|F1MQJ0_BOVIN	Angiotensin-converting enzyme (Fragment) OS=Bos taurus GN=ACE PE=4 SV=2
	tr|F1MPJ8|F1MPJ8_BOVIN	Uncharacterized protein (Fragment) OS=Bos taurus GN=NPEPL1 PE=4 SV=2
	tr|F1MPG6|F1MPG6_BOVIN	Uncharacterized protein (Fragment) OS=Bos taurus GN=PTBP3 PE=4 SV=2
	tr|F1MNW4|F1MNW4_BOVIN	Inter-alpha-trypsin inhibitor heavy chain H2 OS=Bos taurus GN=ITIH2 PE=4 SV=2
	tr|F1MNV5|F1MNV5_BOVIN	Kininogen-1 OS=Bos taurus GN=KNG1 PE=2 SV=2
	tr|F1MNS2|F1MNS2_BOVIN	Uncharacterized protein (Fragment) OS=Bos taurus GN=SRPK2 PE=4 SV=2
	tr|F1MNF8|F1MNF8_BOVIN	Uncharacterized protein OS=Bos taurus GN=LOC100141266 PE=2 SV=1
	tr|F1MN63|F1MN63_BOVIN	Uncharacterized protein OS=Bos taurus GN=DEPDC5 PE=4 SV=2
	tr|F1MMU4|F1MMU4_BOVIN	Uncharacterized protein OS=Bos taurus GN=H1FX PE=3 SV=2
	tr|F1MMT2|F1MMT2_BOVIN	Uncharacterized protein (Fragment) OS=Bos taurus GN=LAMA2 PE=4 SV=2
	tr|F1MMP5|F1MMP5_BOVIN	Inter-alpha-trypsin inhibitor heavy chain H1 OS=Bos taurus GN=ITIH1 PE=4 SV=1
	tr|F1MMK9|F1MMK9_BOVIN	Protein AMBP OS=Bos taurus GN=AMBP PE=4 SV=2
	tr|F1MMK8|F1MMK8_BOVIN	Lysine--tRNA ligase OS=Bos taurus GN=KARS PE=3 SV=1
	tr|F1MMK2|F1MMK2_BOVIN	Glucose-6-phosphate 1-dehydrogenase OS=Bos taurus GN=G6PD PE=3 SV=1
	tr|F1MM32|F1MM32_BOVIN	Sulfhydryl oxidase OS=Bos taurus GN=QSOX1 PE=3 SV=2
	tr|F1MLV1|F1MLV1_BOVIN	26S protease regulatory subunit 10B OS=Bos taurus GN=PSMC6 PE=4 SV=2
	tr|F1MLH6|F1MLH6_BOVIN	Calmodulin OS=Bos taurus GN=CALM PE=4 SV=2
	tr|F1ML12|F1ML12_BOVIN	Glutaredoxin-3 OS=Bos taurus GN=GLRX3 PE=4 SV=2
	tr|F1MKW3|F1MKW3_BOVIN	Uncharacterized protein (Fragment) OS=Bos taurus GN=PLEKHS1 PE=4 SV=2
	tr|F1MKS5|F1MKS5_BOVIN	Histidine-rich glycoprotein OS=Bos taurus GN=HRG PE=4 SV=2
	tr|F1MJQ3|F1MJQ3_BOVIN	Uncharacterized protein OS=Bos taurus GN=AMY2B PE=3 SV=1
	tr|F1MJQ1|F1MJQ1_BOVIN	Ras-related protein Rab-7a OS=Bos taurus GN=RAB7A PE=3 SV=1
	tr|F1MJH8|F1MJH8_BOVIN	Uncharacterized protein (Fragment) OS=Bos taurus GN=ARHGAP18 PE=2 SV=2
	tr|F1MJ56|F1MJ56_BOVIN	Unconventional myosin-Id OS=Bos taurus GN=MYO1D PE=4 SV=1
	tr|F1MIR2|F1MIR2_BOVIN	Uncharacterized protein OS=Bos taurus GN=EXOC6B PE=4 SV=2
	tr|F1MIF2|F1MIF2_BOVIN	Uncharacterized protein OS=Bos taurus GN=AP1B1 PE=4 SV=1
	tr|F1MIE2|F1MIE2_BOVIN	Uncharacterized protein OS=Bos taurus GN=SQSTM1 PE=4 SV=2
	tr|F1MI78|F1MI78_BOVIN	Uncharacterized protein OS=Bos taurus GN=MAP9 PE=4 SV=2
	tr|F1MI43|F1MI43_BOVIN	Sperm surface protein Sp17 OS=Bos taurus GN=SPA17 PE=3 SV=1
	tr|F1MHG5|F1MHG5_BOVIN	Uncharacterized protein (Fragment) OS=Bos taurus GN=ARHGAP21 PE=4 SV=2
	tr|F1MHE7|F1MHE7_BOVIN	Uncharacterized protein OS=Bos taurus GN=LRRC40 PE=4 SV=1
	tr|F1MGU7|F1MGU7_BOVIN	Fibrinogen gamma-B chain OS=Bos taurus GN=FGG PE=2 SV=1
	tr|F1MG56|F1MG56_BOVIN	Serine/threonine-protein phosphatase 2A 55 kDa regulatory subunit B OS=Bos taurus GN=PPP2R2A PE=3 SV=2
	tr|F1MFY7|F1MFY7_BOVIN	Anoctamin (Fragment) OS=Bos taurus GN=ANO6 PE=3 SV=1
	tr|F1MFU5|F1MFU5_BOVIN	Uncharacterized protein OS=Bos taurus GN=RPAP3 PE=2 SV=2
	tr|F1MFC6|F1MFC6_BOVIN	Uncharacterized protein OS=Bos taurus GN=FARP1 PE=4 SV=2
	tr|F1MF92|F1MF92_BOVIN	Uncharacterized protein OS=Bos taurus GN=ZMYM6 PE=4 SV=2
	tr|F1MEN8|F1MEN8_BOVIN	Protein disulfide-isomerase A4 OS=Bos taurus GN=PDIA4 PE=2 SV=1
	tr|F1MEG3|F1MEG3_BOVIN	Uncharacterized protein OS=Bos taurus GN=LAMA1 PE=4 SV=2
	tr|F1MDT8|F1MDT8_BOVIN	Uncharacterized protein (Fragment) OS=Bos taurus GN=SETD2 PE=4 SV=2
	tr|F1MD74|F1MD74_BOVIN	Calpastatin OS=Bos taurus GN=CAST PE=2 SV=2
	tr|F1MD66|F1MD66_BOVIN	Annexin OS=Bos taurus GN=ANXA11 PE=2 SV=2
	tr|F1MD24|F1MD24_BOVIN	Uncharacterized protein OS=Bos taurus GN=SLC5A1 PE=2 SV=2
	tr|F1MD00|F1MD00_BOVIN	Uncharacterized protein (Fragment) OS=Bos taurus GN=FAM214A PE=2 SV=1
	tr|F1MCX1|F1MCX1_BOVIN	Uncharacterized protein (Fragment) OS=Bos taurus GN=GPC4 PE=3 SV=1
	tr|F1MC50|F1MC50_BOVIN	Uncharacterized protein (Fragment) OS=Bos taurus GN=ITSN2 PE=4 SV=2
	tr|F1MC45|F1MC45_BOVIN	Complement factor H (Fragment) OS=Bos taurus GN=CFH PE=4 SV=2
	tr|F1MC22|F1MC22_BOVIN	Uncharacterized protein OS=Bos taurus GN=C1H21orf59 PE=4 SV=1
	tr|F1MC11|F1MC11_BOVIN	Keratin, type I cytoskeletal 14 OS=Bos taurus GN=KRT14 PE=3 SV=2
	tr|F1MBS3|F1MBS3_BOVIN	Transforming growth factor-beta-induced protein ig-h3 (Fragment) OS=Bos taurus GN=TGFBI PE=4 SV=2
	tr|F1MBM9|F1MBM9_BOVIN	Uncharacterized protein OS=Bos taurus GN=ARHGEF7 PE=4 SV=2
	tr|F1MBI1|F1MBI1_BOVIN	Proteasome subunit beta type OS=Bos taurus GN=PSMB7 PE=3 SV=2
	tr|F1MBG6|F1MBG6_BOVIN	Uncharacterized protein OS=Bos taurus GN=GIT1 PE=4 SV=2
	tr|F1MB52|F1MB52_BOVIN	Uncharacterized protein OS=Bos taurus GN=BBS7 PE=4 SV=2
	tr|F1MAZ3|F1MAZ3_BOVIN	Microtubule-associated protein OS=Bos taurus GN=MAP4 PE=2 SV=2
	tr|F1MAV0|F1MAV0_BOVIN	Fibrinogen beta chain OS=Bos taurus GN=FGB PE=2 SV=2
	tr|F1MAU6|F1MAU6_BOVIN	Uncharacterized protein OS=Bos taurus GN=FSD1L PE=4 SV=2
	tr|E1BPW1|E1BPW1_BOVIN	Oxysterol-binding protein (Fragment) OS=Bos taurus GN=OSBP PE=3 SV=2
	tr|E1BNX1|E1BNX1_BOVIN	Uncharacterized protein OS=Bos taurus GN=RAB3D PE=3 SV=1
	tr|E1BN47|E1BN47_BOVIN	Cytoplasmic FMR1-interacting protein 1 OS=Bos taurus GN=CYFIP1 PE=4 SV=2
	tr|E1BN34|E1BN34_BOVIN	Uncharacterized protein OS=Bos taurus GN=BBS1 PE=4 SV=1
	tr|E1BMW9|E1BMW9_BOVIN	Uncharacterized protein OS=Bos taurus GN=PURA PE=4 SV=2
	tr|E1BMG2|E1BMG2_BOVIN	Uncharacterized protein OS=Bos taurus GN=DNAH5 PE=4 SV=2
	tr|E1BM92|E1BM92_BOVIN	Uncharacterized protein OS=Bos taurus GN=PROM2 PE=4 SV=2
	tr|E1BM12|E1BM12_BOVIN	Uncharacterized protein OS=Bos taurus GN=SRM PE=3 SV=1
	tr|E1BLL9|E1BLL9_BOVIN	Uncharacterized protein OS=Bos taurus GN=OAF PE=4 SV=2
	tr|E1BL62|E1BL62_BOVIN	Aldehyde oxidase 4 OS=Bos taurus GN=AOX4 PE=2 SV=1
	tr|E1BL45|E1BL45_BOVIN	Uncharacterized protein OS=Bos taurus GN=EHBP1L1 PE=4 SV=2
	tr|E1BKF9|E1BKF9_BOVIN	Uncharacterized protein OS=Bos taurus GN=WDR16 PE=4 SV=1
	tr|E1BKD0|E1BKD0_BOVIN	Ribosomal protein OS=Bos taurus PE=3 SV=2
	tr|E1BK70|E1BK70_BOVIN	Uncharacterized protein OS=Bos taurus PE=3 SV=2
	tr|E1BJB1|E1BJB1_BOVIN	Tubulin beta-2B chain OS=Bos taurus GN=TUBB2B PE=2 SV=1
	tr|E1BJ55|E1BJ55_BOVIN	Uncharacterized protein OS=Bos taurus GN=ZNF428 PE=4 SV=1
	tr|E1BIH1|E1BIH1_BOVIN	P2X purinoceptor OS=Bos taurus GN=P2RX2 PE=3 SV=2
	tr|E1BI28|E1BI28_BOVIN	Uncharacterized protein OS=Bos taurus GN=GM2A PE=4 SV=1
	tr|E1BHY4|E1BHY4_BOVIN	Uncharacterized protein OS=Bos taurus PE=4 SV=1
	tr|E1BHX7|E1BHX7_BOVIN	Uncharacterized protein OS=Bos taurus GN=PLCB3 PE=4 SV=1
	tr|E1BHV1|E1BHV1_BOVIN	Uncharacterized protein OS=Bos taurus GN=RYR2 PE=4 SV=2
	tr|E1BHJ5|E1BHJ5_BOVIN	Uncharacterized protein OS=Bos taurus GN=BBS9 PE=4 SV=2
	tr|E1BHH0|E1BHH0_BOVIN	Uncharacterized protein (Fragment) OS=Bos taurus GN=PHC1 PE=4 SV=2
	tr|E1BGA6|E1BGA6_BOVIN	Uncharacterized protein OS=Bos taurus GN=COG3 PE=4 SV=2
	tr|E1BFI8|E1BFI8_BOVIN	Uncharacterized protein OS=Bos taurus GN=SPAG1 PE=4 SV=2
	tr|E1BFG0|E1BFG0_BOVIN	Alpha-aminoadipic semialdehyde dehydrogenase OS=Bos taurus GN=ALDH7A1 PE=3 SV=2
	tr|E1BFC3|E1BFC3_BOVIN	Uncharacterized protein OS=Bos taurus GN=DFNA5 PE=4 SV=1
	tr|E1BEX4|E1BEX4_BOVIN	Uroporphyrinogen decarboxylase OS=Bos taurus GN=UROD PE=3 SV=1
	tr|E1BEU1|E1BEU1_BOVIN	Uncharacterized protein OS=Bos taurus GN=TTC12 PE=4 SV=2
	tr|E1BE13|E1BE13_BOVIN	Uncharacterized protein OS=Bos taurus GN=BIRC6 PE=4 SV=2
	tr|E1BCX9|E1BCX9_BOVIN	Uncharacterized protein (Fragment) OS=Bos taurus GN=EPS8 PE=2 SV=2
	tr|E1BCW0|E1BCW0_BOVIN	Uncharacterized protein (Fragment) OS=Bos taurus GN=HGFAC PE=3 SV=2
	tr|E1BCA5|E1BCA5_BOVIN	Uncharacterized protein OS=Bos taurus GN=SERPINI1 PE=3 SV=2
	tr|E1BC98|E1BC98_BOVIN	Transcription elongation factor SPT5 OS=Bos taurus GN=SUPT5H PE=2 SV=2
	tr|E1BC55|E1BC55_BOVIN	Uncharacterized protein OS=Bos taurus GN=KIAA1671 PE=4 SV=2
	tr|E1BBH1|E1BBH1_BOVIN	Uncharacterized protein OS=Bos taurus GN=PHLDB2 PE=4 SV=1
	tr|E1BB91|E1BB91_BOVIN	Uncharacterized protein OS=Bos taurus GN=COL6A3 PE=2 SV=1
	tr|E1BA62|E1BA62_BOVIN	Uncharacterized protein OS=Bos taurus GN=DNM3 PE=3 SV=2
	tr|E1B9Q4|E1B9Q4_BOVIN	Uncharacterized protein OS=Bos taurus GN=MSH6 PE=3 SV=2
	tr|E1B9F6|E1B9F6_BOVIN	Elongation factor 1-alpha OS=Bos taurus GN=EEF1A1 PE=3 SV=2
	tr|E1B9D9|E1B9D9_BOVIN	Uncharacterized protein (Fragment) OS=Bos taurus GN=TRAF2 PE=4 SV=2
	tr|E1B8P9|E1B8P9_BOVIN	Uncharacterized protein OS=Bos taurus GN=MAPK3 PE=4 SV=1
	tr|E1B7R4|E1B7R4_BOVIN	Eukaryotic translation initiation factor 3 subunit A OS=Bos taurus GN=EIF3A PE=3 SV=2
	tr|E1B7F6|E1B7F6_BOVIN	Uncharacterized protein OS=Bos taurus GN=PLXNB1 PE=4 SV=2
	tr|E1B726|E1B726_BOVIN	Plasminogen OS=Bos taurus GN=PLG PE=2 SV=2
	tr|E1B6Y1|E1B6Y1_BOVIN	Uncharacterized protein OS=Bos taurus GN=CCDC90A PE=4 SV=2
	tr|D3JUI8|D3JUI8_BOVIN	RNA-binding motif protein, X chromosome OS=Bos taurus GN=RBMX PE=2 SV=1
	tr|C4T8B4|C4T8B4_BOVIN	C-reactive protein OS=Bos taurus GN=CRP PE=2 SV=1
	tr|B0JYL6|B0JYL6_BOVIN	Signal transducer and activator of transcription OS=Bos taurus GN=STAT1 PE=2 SV=1
	tr|A8YXZ2|A8YXZ2_BOVIN	C8G protein OS=Bos taurus GN=C8G PE=2 SV=1
	tr|A8E4P2|A8E4P2_BOVIN	FARSB protein OS=Bos taurus GN=FARSB PE=2 SV=1
	tr|A7Z081|A7Z081_BOVIN	C3H1ORF92 protein OS=Bos taurus GN=C3H1ORF92 PE=2 SV=1
	tr|A7Z057|A7Z057_BOVIN	14-3-3 protein gamma OS=Bos taurus GN=YWHAG PE=2 SV=1
	tr|A7Z055|A7Z055_BOVIN	PLAA protein OS=Bos taurus GN=PLAA PE=2 SV=1
	tr|A7Z051|A7Z051_BOVIN	SAPS3 protein OS=Bos taurus GN=SAPS3 PE=2 SV=1
	tr|A7Z037|A7Z037_BOVIN	CHN1 protein OS=Bos taurus GN=CHN1 PE=2 SV=1
	tr|A7Z024|A7Z024_BOVIN	RP2 protein OS=Bos taurus GN=RP2 PE=2 SV=1
	tr|A7Z014|A7Z014_BOVIN	Transketolase OS=Bos taurus GN=TKT PE=2 SV=1
	tr|A7YY43|A7YY43_BOVIN	DUSP3 protein OS=Bos taurus GN=DUSP3 PE=2 SV=1
	tr|A7YY24|A7YY24_BOVIN	IGBP1 protein OS=Bos taurus GN=IGBP1 PE=2 SV=1
	tr|A7YWC6|A7YWC6_BOVIN	SUB1 protein OS=Bos taurus GN=SUB1 PE=2 SV=1
	tr|A7MBI5|A7MBI5_BOVIN	DPYSL3 protein OS=Bos taurus GN=DPYSL3 PE=2 SV=1
	tr|A7MBH9|A7MBH9_BOVIN	GNAI2 protein OS=Bos taurus GN=GNAI2 PE=2 SV=1
	tr|A7MBG8|A7MBG8_BOVIN	RUVBL1 protein OS=Bos taurus GN=RUVBL1 PE=2 SV=1
	tr|A7MBD4|A7MBD4_BOVIN	FARSA protein OS=Bos taurus GN=FARSA PE=2 SV=1
	tr|A7MBC5|A7MBC5_BOVIN	IARS protein OS=Bos taurus GN=IARS PE=2 SV=1
	tr|A7MBA2|A7MBA2_BOVIN	PSMD1 protein OS=Bos taurus GN=PSMD1 PE=2 SV=1
	tr|A7MB57|A7MB57_BOVIN	Uncharacterized protein OS=Bos taurus GN=YES1 PE=2 SV=1
	tr|A7MB18|A7MB18_BOVIN	NTN4 protein OS=Bos taurus GN=NTN4 PE=2 SV=1
	tr|A7E3T7|A7E3T7_BOVIN	S-adenosylmethionine synthase OS=Bos taurus GN=MAT2A PE=2 SV=1
	tr|A7E3S8|A7E3S8_BOVIN	Heat shock 70kD protein binding protein OS=Bos taurus GN=ST13 PE=2 SV=1
	tr|A6QR68|A6QR68_BOVIN	SLC31A1 protein OS=Bos taurus GN=SLC31A1 PE=2 SV=1
	tr|A6QR61|A6QR61_BOVIN	SNX12 protein OS=Bos taurus GN=SNX12 PE=2 SV=1
	tr|A6QR52|A6QR52_BOVIN	ACOT11 protein OS=Bos taurus GN=ACOT11 PE=2 SV=1
	tr|A6QR35|A6QR35_BOVIN	SCAMP2 protein OS=Bos taurus GN=SCAMP2 PE=2 SV=1
	tr|A6QR28|A6QR28_BOVIN	Phosphoserine aminotransferase OS=Bos taurus GN=PSAT1 PE=2 SV=1
	tr|A6QR15|A6QR15_BOVIN	LOC535277 protein OS=Bos taurus GN=LOC535277 PE=2 SV=1
	tr|A6QQP0|A6QQP0_BOVIN	MYEF2 protein OS=Bos taurus GN=MYEF2 PE=2 SV=1
	tr|A6QQ11|A6QQ11_BOVIN	PGM2 protein (Fragment) OS=Bos taurus GN=PGM2 PE=2 SV=1
	tr|A6QPZ0|A6QPZ0_BOVIN	CSTB protein OS=Bos taurus GN=CSTB PE=4 SV=1
	tr|A6QPS1|A6QPS1_BOVIN	PPCS protein OS=Bos taurus GN=PPCS PE=2 SV=1
	tr|A6QPP2|A6QPP2_BOVIN	SERPIND1 protein OS=Bos taurus GN=SERPIND1 PE=2 SV=1
	tr|A6QP44|A6QP44_BOVIN	FUK protein OS=Bos taurus GN=FUK PE=2 SV=1
	tr|A6QP40|A6QP40_BOVIN	LRRFIP1 protein OS=Bos taurus GN=LRRFIP1 PE=2 SV=1
	tr|A6QP39|A6QP39_BOVIN	MSLN protein OS=Bos taurus GN=MSLN PE=2 SV=1
	tr|A6QP30|A6QP30_BOVIN	CPN2 protein OS=Bos taurus GN=CPN2 PE=2 SV=1
	tr|A6QNZ5|A6QNZ5_BOVIN	MGC151537 protein OS=Bos taurus GN=MGC151537 PE=2 SV=1
	tr|A6QNL5|A6QNL5_BOVIN	PDIA6 protein (Fragment) OS=Bos taurus GN=PDIA6 PE=2 SV=1
	tr|A6QLZ0|A6QLZ0_BOVIN	Galectin OS=Bos taurus GN=LGALS3 PE=2 SV=1
	tr|A6QLT9|A6QLT9_BOVIN	AARS protein OS=Bos taurus GN=AARS PE=2 SV=1
	tr|A6QLS9|A6QLS9_BOVIN	RAB10 protein OS=Bos taurus GN=RAB10 PE=2 SV=1
	tr|A6QLR2|A6QLR2_BOVIN	LARS protein OS=Bos taurus GN=LARS PE=2 SV=1
	tr|A6QLL8|A6QLL8_BOVIN	Fructose-bisphosphate aldolase OS=Bos taurus GN=ALDOA PE=2 SV=1
	tr|A6QLG1|A6QLG1_BOVIN	LOC515358 protein OS=Bos taurus GN=LOC515358 PE=2 SV=1
	tr|A6QLF9|A6QLF9_BOVIN	BBS5 protein OS=Bos taurus GN=BBS5 PE=2 SV=1
	tr|A6QLD6|A6QLD6_BOVIN	MYO1B protein OS=Bos taurus GN=MYO1B PE=2 SV=1
	tr|A6QLB7|A6QLB7_BOVIN	Adenylyl cyclase-associated protein OS=Bos taurus GN=CAP1 PE=2 SV=1
	tr|A6QLA8|A6QLA8_BOVIN	TRIM25 protein OS=Bos taurus GN=TRIM25 PE=2 SV=1
	tr|A6H7J6|A6H7J6_BOVIN	P4HB protein OS=Bos taurus GN=P4HB PE=2 SV=1
	tr|A6H7E3|A6H7E3_BOVIN	PDZ and LIM domain 1 OS=Bos taurus GN=PDLIM1 PE=2 SV=1
	tr|A6H7A2|A6H7A2_BOVIN	Adenosine deaminase OS=Bos taurus GN=ADA PE=2 SV=1
	tr|A5PKK0|A5PKK0_BOVIN	FAM151B protein OS=Bos taurus GN=FAM151B PE=2 SV=1
	tr|A5PKI0|A5PKI0_BOVIN	APPL1 protein OS=Bos taurus GN=APPL1 PE=2 SV=1
	tr|A5PKC2|A5PKC2_BOVIN	SHBG protein OS=Bos taurus GN=SHBG PE=2 SV=1
	tr|A5PK96|A5PK96_BOVIN	ACP1 protein OS=Bos taurus GN=ACP1 PE=2 SV=1
	tr|A5PJY9|A5PJY9_BOVIN	CPNE3 protein OS=Bos taurus GN=CPNE3 PE=2 SV=1
	tr|A5PJX0|A5PJX0_BOVIN	FBXO22 protein OS=Bos taurus GN=FBXO22 PE=2 SV=1
	tr|A5PJT7|A5PJT7_BOVIN	ECM1 protein OS=Bos taurus GN=ECM1 PE=2 SV=1
	tr|A5PJE3|A5PJE3_BOVIN	Fibrinogen alpha chain OS=Bos taurus GN=FGA PE=2 SV=1
	tr|A5PJ69|A5PJ69_BOVIN	SERPINA10 protein OS=Bos taurus GN=SERPINA10 PE=2 SV=1
	tr|A5D9H5|A5D9H5_BOVIN	Heterogeneous nuclear ribonucleoprotein D OS=Bos taurus GN=HNRPD PE=2 SV=1
	tr|A5D9E9|A5D9E9_BOVIN	Complement component 1, r subcomponent OS=Bos taurus GN=C1R PE=2 SV=1
	tr|A5D984|A5D984_BOVIN	Pyruvate kinase OS=Bos taurus GN=PKM2 PE=2 SV=1
	tr|A5D973|A5D973_BOVIN	Alpha isoform of regulatory subunit A, protein phosphatase 2 OS=Bos taurus GN=PPP2R1A PE=2 SV=1
	tr|A5D7V3|A5D7V3_BOVIN	ESM1 protein OS=Bos taurus GN=ESM1 PE=2 SV=1
	tr|A5D7P3|A5D7P3_BOVIN	Platelet-activating factor acetylhydrolase IB subunit alpha OS=Bos taurus GN=PAFAH1B1 PE=2 SV=1
	tr|A5D7L4|A5D7L4_BOVIN	LOC781700 protein OS=Bos taurus GN=LOC781700 PE=2 SV=1
	tr|A5D7K0|A5D7K0_BOVIN	BLVRA protein OS=Bos taurus GN=BLVRA PE=2 SV=1
	tr|A5D7J6|A5D7J6_BOVIN	CALR protein OS=Bos taurus GN=CALR PE=2 SV=1
	tr|A5D7H6|A5D7H6_BOVIN	KLRAQ1 protein OS=Bos taurus GN=KLRAQ1 PE=2 SV=1
	tr|A5D7E8|A5D7E8_BOVIN	PDIA3 protein OS=Bos taurus GN=PDIA3 PE=2 SV=1
	tr|A5D7E6|A5D7E6_BOVIN	CD82 protein OS=Bos taurus GN=CD82 PE=2 SV=1
	tr|A5D7A2|A5D7A2_BOVIN	GARS protein OS=Bos taurus GN=GARS PE=2 SV=1
	tr|A4IFV2|A4IFV2_BOVIN	CA8 protein OS=Bos taurus GN=CA8 PE=2 SV=1
	tr|A4IFN7|A4IFN7_BOVIN	UBE3A protein OS=Bos taurus GN=UBE3A PE=2 SV=1
	tr|A4IFE6|A4IFE6_BOVIN	ABCE1 protein OS=Bos taurus GN=ABCE1 PE=2 SV=1
	tr|A4IFD1|A4IFD1_BOVIN	PDCD4 protein OS=Bos taurus GN=PDCD4 PE=2 SV=1
	tr|A4IFC3|A4IFC3_BOVIN	PABPC4 protein OS=Bos taurus GN=PABPC4 PE=2 SV=1
	tr|A4IFB8|A4IFB8_BOVIN	IPO4 protein OS=Bos taurus GN=IPO4 PE=2 SV=1
	tr|A4FV69|A4FV69_BOVIN	SERPINB5 protein OS=Bos taurus GN=SERPINB5 PE=2 SV=1
	tr|A4FV23|A4FV23_BOVIN	DDX21 protein OS=Bos taurus GN=DDX21 PE=2 SV=1
	tr|A4FUZ3|A4FUZ3_BOVIN	Proteasome (Prosome, macropain) 26S subunit, ATPase, 1 OS=Bos taurus GN=PSMC1 PE=2 SV=1
	tr|A4FUZ1|A4FUZ1_BOVIN	GLO1 protein OS=Bos taurus GN=GLO1 PE=2 SV=1
	tr|A4FUD0|A4FUD0_BOVIN	MTHFD1 protein OS=Bos taurus GN=MTHFD1 PE=2 SV=1
	tr|A4FUC8|A4FUC8_BOVIN	CARS protein OS=Bos taurus GN=CARS PE=2 SV=1
	tr|A3KN51|A3KN51_BOVIN	TSG101 protein OS=Bos taurus GN=TSG101 PE=2 SV=1
	tr|A3KLR9|A3KLR9_BOVIN	Superoxide dismutase [Cu-Zn] OS=Bos taurus GN=ECSOD PE=2 SV=1
	tr|A2VE92|A2VE92_BOVIN	CD55 protein OS=Bos taurus GN=CD55 PE=2 SV=1
	tr|A2VE41|A2VE41_BOVIN	EGF-containing fibulin-like extracellular matrix protein 1 OS=Bos taurus GN=EFEMP1 PE=2 SV=1
	tr|A2VDW0|A2VDW0_BOVIN	Lymphocyte antigen 6 complex, locus G6E OS=Bos taurus GN=LY6G6E PE=2 SV=1
	tr|A2VDQ0|A2VDQ0_BOVIN	Intraflagellar transport 81 homolog (Chlamydomonas) OS=Bos taurus GN=IFT81 PE=2 SV=1
	tr|A1L5B7|A1L5B7_BOVIN	SERPINE1 mRNA binding protein 1 OS=Bos taurus GN=SERBP1 PE=2 SV=1
	tr|A1L579|A1L579_BOVIN	Oviduct-specific glycoprotein OS=Bos taurus GN=OVGP1 PE=2 SV=1
	tr|A1L528|A1L528_BOVIN	RAB1A, member RAS oncogene family OS=Bos taurus GN=RAB1A PE=2 SV=1
	tr|A1A4L7|A1A4L7_BOVIN	Glutathione S-transferase Mu 1 OS=Bos taurus GN=GSTM4 PE=2 SV=1
	tr|A1A4I8|A1A4I8_BOVIN	Uncharacterized protein OS=Bos taurus GN=XPO7 PE=2 SV=1
	tr|A0JNE9|A0JNE9_BOVIN	CTP synthase OS=Bos taurus GN=CTPS PE=2 SV=1
	tr|A0JN77|A0JN77_BOVIN	Bifunctional ATP-dependent dihydroxyacetone kinase/FAD-AMP lyase (cyclizing) OS=Bos taurus GN=DAK PE=2 SV=1
	sp|Q9XTA2|PPCE_BOVIN	Prolyl endopeptidase OS=Bos taurus GN=PREP PE=2 SV=1
	sp|Q9XSK7|HDGF_BOVIN	Hepatoma-derived growth factor OS=Bos taurus GN=HDGF PE=2 SV=1
	sp|Q9XSJ4|ENOA_BOVIN	Alpha-enolase OS=Bos taurus GN=ENO1 PE=1 SV=4
	sp|Q9XSI3|RL10_BOVIN	60S ribosomal protein L10 OS=Bos taurus GN=RPL10 PE=2 SV=4
	sp|Q9XSG3|IDHC_BOVIN	Isocitrate dehydrogenase [NADP] cytoplasmic OS=Bos taurus GN=IDH1 PE=2 SV=1
	sp|Q9XSA7|CLIC4_BOVIN	Chloride intracellular channel protein 4 OS=Bos taurus GN=CLIC4 PE=2 SV=3
	sp|Q9TTE1|SPA31_BOVIN	Serpin A3-1 OS=Bos taurus GN=SERPINA3-1 PE=1 SV=3
	sp|Q9TT36|THBG_BOVIN	Thyroxine-binding globulin OS=Bos taurus GN=SERPINA7 PE=2 SV=1
	sp|Q9TRY0|FKBP4_BOVIN	Peptidyl-prolyl cis-trans isomerase FKBP4 OS=Bos taurus GN=FKBP4 PE=1 SV=4
	sp|Q9TR36|PIPNB_BOVIN	Phosphatidylinositol transfer protein beta isoform OS=Bos taurus GN=PITPNB PE=1 SV=3
	sp|Q9N2I2|IPSP_BOVIN	Plasma serine protease inhibitor OS=Bos taurus GN=SERPINA5 PE=1 SV=1
	sp|Q9N0V4|GSTM1_BOVIN	Glutathione S-transferase Mu 1 OS=Bos taurus GN=GSTM1 PE=1 SV=3
	sp|Q9N0T5|IF4E_BOVIN	Eukaryotic translation initiation factor 4E OS=Bos taurus GN=EIF4E PE=2 SV=2
	sp|Q9N0K1|CD47_BOVIN	Leukocyte surface antigen CD47 OS=Bos taurus GN=CD47 PE=2 SV=1
	sp|Q9MZ08|BCAM_BOVIN	Basal cell adhesion molecule OS=Bos taurus GN=BCAM PE=2 SV=2
	sp|Q9HWK6|LYSC_PSEAE	Lysyl endopeptidase OS=Pseudomonas aeruginosa (strain ATCC 15692 / PAO1 / 1C / PRS 101 / LMG 12228) GN=prpL PE=1 SV=1
	sp|Q9GMB8|SYSC_BOVIN	Serine--tRNA ligase, cytoplasmic OS=Bos taurus GN=SARS PE=2 SV=3
	sp|Q9GKN8|PRELP_BOVIN	Prolargin OS=Bos taurus GN=PRELP PE=2 SV=1
	sp|Q9BGI3|PRDX2_BOVIN	Peroxiredoxin-2 OS=Bos taurus GN=PRDX2 PE=2 SV=1
	sp|Q9BGI2|PRDX4_BOVIN	Peroxiredoxin-4 OS=Bos taurus GN=PRDX4 PE=2 SV=1
	sp|Q9BGI1|PRDX5_BOVIN	Peroxiredoxin-5, mitochondrial OS=Bos taurus GN=PRDX5 PE=2 SV=2
	sp|Q95M18|ENPL_BOVIN	Endoplasmin OS=Bos taurus GN=HSP90B1 PE=2 SV=1
	sp|Q95L54|ANXA8_BOVIN	Annexin A8 OS=Bos taurus GN=ANXA8 PE=2 SV=1
	sp|Q95140|RLA0_BOVIN	60S acidic ribosomal protein P0 OS=Bos taurus GN=RPLP0 PE=2 SV=3
	sp|Q95121|PEDF_BOVIN	Pigment epithelium-derived factor OS=Bos taurus GN=SERPINF1 PE=1 SV=1
	sp|Q95114|MFGM_BOVIN	Lactadherin OS=Bos taurus GN=MFGE8 PE=1 SV=2
	sp|Q95107|WASL_BOVIN	Neural Wiskott-Aldrich syndrome protein OS=Bos taurus GN=WASL PE=1 SV=1
	sp|Q8WN55|PTBP1_BOVIN	Polypyrimidine tract-binding protein 1 OS=Bos taurus GN=PTBP1 PE=2 SV=1
	sp|Q8WMY2|FPPS_BOVIN	Farnesyl pyrophosphate synthase OS=Bos taurus GN=FDPS PE=1 SV=1
	sp|Q8WML4|MUC1_BOVIN	Mucin-1 OS=Bos taurus GN=MUC1 PE=1 SV=1
	sp|Q8SPP7|PGRP1_BOVIN	Peptidoglycan recognition protein 1 OS=Bos taurus GN=PGLYRP1 PE=1 SV=1
	sp|Q8MKF0|L2GL1_BOVIN	Lethal(2) giant larvae protein homolog 1 OS=Bos taurus GN=LLGL1 PE=2 SV=1
	sp|Q8MJ50|OSTF1_BOVIN	Osteoclast-stimulating factor 1 OS=Bos taurus GN=OSTF1 PE=2 SV=1
	sp|Q8HYI9|PFD5_BOVIN	Prefoldin subunit 5 OS=Bos taurus GN=PFDN5 PE=2 SV=1
	sp|Q864V4|UPK3B_BOVIN	Uroplakin-3b OS=Bos taurus GN=UPK3B PE=1 SV=1
	sp|Q863D4|KCNRG_BOVIN	Potassium channel regulatory protein OS=Bos taurus GN=KCNRG PE=2 SV=1
	sp|Q863B3|SND1_BOVIN	Staphylococcal nuclease domain-containing protein 1 OS=Bos taurus GN=SND1 PE=1 SV=1
	sp|Q862I1|RL24_BOVIN	60S ribosomal protein L24 OS=Bos taurus GN=RPL24 PE=2 SV=2
	sp|Q7YRQ8|TFPI2_BOVIN	Tissue factor pathway inhibitor 2 OS=Bos taurus GN=TFPI2 PE=2 SV=1
	sp|Q7SIH1|A2MG_BOVIN	Alpha-2-macroglobulin OS=Bos taurus GN=A2M PE=1 SV=2
	sp|Q76LV2|HS90A_BOVIN	Heat shock protein HSP 90-alpha OS=Bos taurus GN=HSP90AA1 PE=1 SV=3
	sp|Q76LV1|HS90B_BOVIN	Heat shock protein HSP 90-beta OS=Bos taurus GN=HSP90AB1 PE=2 SV=3
	sp|Q76I82|RS15A_BOVIN	40S ribosomal protein S15a OS=Bos taurus GN=RPS15A PE=2 SV=1
	sp|Q76I81|RS12_BOVIN	40S ribosomal protein S12 OS=Bos taurus GN=RPS12 PE=2 SV=1
	sp|Q71SP7|FAS_BOVIN	Fatty acid synthase OS=Bos taurus GN=FASN PE=2 SV=1
	sp|Q6QRN6|NNRE_BOVIN	NAD(P)H-hydrate epimerase OS=Bos taurus GN=APOA1BP PE=2 SV=1
	sp|Q6Q137|SEPT7_BOVIN	Septin-7 OS=Bos taurus GN=SEPT7 PE=2 SV=2
	sp|Q6EWQ7|IF5A1_BOVIN	Eukaryotic translation initiation factor 5A-1 OS=Bos taurus GN=EIF5A PE=2 SV=3
	sp|Q6B857|CP080_BOVIN	UPF0468 protein C16orf80 homolog OS=Bos taurus PE=2 SV=1
	sp|Q6B856|TBB2B_BOVIN	Tubulin beta-2B chain OS=Bos taurus GN=TUBB2B PE=1 SV=2
	sp|Q6B855|TKT_BOVIN	Transketolase OS=Bos taurus GN=TKT PE=2 SV=1
	sp|Q5XQN5|K2C5_BOVIN	Keratin, type II cytoskeletal 5 OS=Bos taurus GN=KRT5 PE=1 SV=1
	sp|Q5KR49|TPM1_BOVIN	Tropomyosin alpha-1 chain OS=Bos taurus GN=TPM1 PE=2 SV=1
	sp|Q5KR47|TPM3_BOVIN	Tropomyosin alpha-3 chain OS=Bos taurus GN=TPM3 PE=2 SV=1
	sp|Q5EAE6|DAP1_BOVIN	Death-associated protein 1 OS=Bos taurus GN=DAP PE=3 SV=3
	sp|Q5EAD6|RL15_BOVIN	60S ribosomal protein L15 OS=Bos taurus GN=RPL15 PE=2 SV=3
	sp|Q5EAD2|SERA_BOVIN	D-3-phosphoglycerate dehydrogenase OS=Bos taurus GN=PHGDH PE=2 SV=3
	sp|Q5EAD0|BAIP2_BOVIN	Brain-specific angiogenesis inhibitor 1-associated protein 2 OS=Bos taurus GN=BAIAP2 PE=2 SV=1
	sp|Q5EAC6|CDC37_BOVIN	Hsp90 co-chaperone Cdc37 OS=Bos taurus GN=CDC37 PE=2 SV=1
	sp|Q5EAC2|GSHB_BOVIN	Glutathione synthetase OS=Bos taurus GN=GSS PE=2 SV=1
	sp|Q5EA95|IFT57_BOVIN	Intraflagellar transport protein 57 homolog OS=Bos taurus GN=IFT57 PE=1 SV=1
	sp|Q5EA79|GALM_BOVIN	Aldose 1-epimerase OS=Bos taurus GN=GALM PE=2 SV=1
	sp|Q5EA61|KCRB_BOVIN	Creatine kinase B-type OS=Bos taurus GN=CKB PE=2 SV=1
	sp|Q5EA01|B3GN1_BOVIN	N-acetyllactosaminide beta-1,3-N-acetylglucosaminyltransferase OS=Bos taurus GN=B3GNT1 PE=2 SV=2
	sp|Q5E9X4|LRC59_BOVIN	Leucine-rich repeat-containing protein 59 OS=Bos taurus GN=LRRC59 PE=2 SV=1
	sp|Q5E9T9|RTCB_BOVIN	tRNA-splicing ligase RtcB homolog OS=Bos taurus GN=RTCB PE=2 SV=1
	sp|Q5E9R3|EHD1_BOVIN	EH domain-containing protein 1 OS=Bos taurus GN=EHD1 PE=1 SV=1
	sp|Q5E9K0|PSB2_BOVIN	Proteasome subunit beta type-2 OS=Bos taurus GN=PSMB2 PE=1 SV=1
	sp|Q5E9J1|HNRPF_BOVIN	Heterogeneous nuclear ribonucleoprotein F OS=Bos taurus GN=HNRNPF PE=2 SV=3
	sp|Q5E9I7|MEP50_BOVIN	Methylosome protein 50 OS=Bos taurus GN=WDR77 PE=2 SV=1
	sp|Q5E9G3|PSME2_BOVIN	Proteasome activator complex subunit 2 OS=Bos taurus GN=PSME2 PE=1 SV=3
	sp|Q5E9F9|PRS7_BOVIN	26S protease regulatory subunit 7 OS=Bos taurus GN=PSMC2 PE=2 SV=3
	sp|Q5E9F7|COF1_BOVIN	Cofilin-1 OS=Bos taurus GN=CFL1 PE=2 SV=3
	sp|Q5E9F5|TAGL2_BOVIN	Transgelin-2 OS=Bos taurus GN=TAGLN2 PE=2 SV=3
	sp|Q5E9E6|RL10A_BOVIN	60S ribosomal protein L10a OS=Bos taurus GN=RPL10A PE=2 SV=3
	sp|Q5E9D5|DEST_BOVIN	Destrin OS=Bos taurus GN=DSTN PE=2 SV=3
	sp|Q5E9D0|IF2B_BOVIN	Eukaryotic translation initiation factor 2 subunit 2 OS=Bos taurus GN=EIF2S2 PE=2 SV=1
	sp|Q5E9B7|CLIC1_BOVIN	Chloride intracellular channel protein 1 OS=Bos taurus GN=CLIC1 PE=2 SV=3
	sp|Q5E9B5|ACTH_BOVIN	Actin, gamma-enteric smooth muscle OS=Bos taurus GN=ACTG2 PE=2 SV=1
	sp|Q5E9B1|LDHB_BOVIN	L-lactate dehydrogenase B chain OS=Bos taurus GN=LDHB PE=2 SV=4
	sp|Q5E9A3|PCBP1_BOVIN	Poly(rC)-binding protein 1 OS=Bos taurus GN=PCBP1 PE=2 SV=1
	sp|Q5E9A1|NACA_BOVIN	Nascent polypeptide-associated complex subunit alpha OS=Bos taurus GN=NACA PE=1 SV=1
	sp|Q5E997|CAZA2_BOVIN	F-actin-capping protein subunit alpha-2 OS=Bos taurus GN=CAPZA2 PE=1 SV=3
	sp|Q5E995|RS6_BOVIN	40S ribosomal protein S6 OS=Bos taurus GN=RPS6 PE=2 SV=1
	sp|Q5E992|PPIL1_BOVIN	Peptidyl-prolyl cis-trans isomerase-like 1 OS=Bos taurus GN=PPIL1 PE=2 SV=1
	sp|Q5E988|RS5_BOVIN	40S ribosomal protein S5 OS=Bos taurus GN=RPS5 PE=2 SV=3
	sp|Q5E987|PSA5_BOVIN	Proteasome subunit alpha type-5 OS=Bos taurus GN=PSMA5 PE=1 SV=1
	sp|Q5E984|TCTP_BOVIN	Translationally-controlled tumor protein OS=Bos taurus GN=TPT1 PE=2 SV=1
	sp|Q5E983|EF1B_BOVIN	Elongation factor 1-beta OS=Bos taurus GN=EEF1B PE=2 SV=3
	sp|Q5E973|RL18_BOVIN	60S ribosomal protein L18 OS=Bos taurus GN=RPL18 PE=2 SV=3
	sp|Q5E971|TMEDA_BOVIN	Transmembrane emp24 domain-containing protein 10 OS=Bos taurus GN=TMED10 PE=2 SV=1
	sp|Q5E966|EIF3I_BOVIN	Eukaryotic translation initiation factor 3 subunit I OS=Bos taurus GN=EIF3I PE=2 SV=1
	sp|Q5E964|PSD13_BOVIN	26S proteasome non-ATPase regulatory subunit 13 OS=Bos taurus GN=PSMD13 PE=2 SV=1
	sp|Q5E963|ARP5L_BOVIN	Actin-related protein 2/3 complex subunit 5-like protein OS=Bos taurus GN=ARPC5L PE=2 SV=1
	sp|Q5E959|STRAP_BOVIN	Serine-threonine kinase receptor-associated protein OS=Bos taurus GN=STRAP PE=2 SV=1
	sp|Q5E958|RS8_BOVIN	40S ribosomal protein S8 OS=Bos taurus GN=RPS8 PE=2 SV=3
	sp|Q5E956|TPIS_BOVIN	Triosephosphate isomerase OS=Bos taurus GN=TPI1 PE=2 SV=3
	sp|Q5E954|DNJA1_BOVIN	DnaJ homolog subfamily A member 1 OS=Bos taurus GN=DNAJA1 PE=2 SV=2
	sp|Q5E953|UFC1_BOVIN	Ubiquitin-fold modifier-conjugating enzyme 1 OS=Bos taurus GN=UFC1 PE=2 SV=1
	sp|Q5E951|TBCB_BOVIN	Tubulin-folding cofactor B OS=Bos taurus GN=TBCB PE=2 SV=1
	sp|Q5E947|PRDX1_BOVIN	Peroxiredoxin-1 OS=Bos taurus GN=PRDX1 PE=2 SV=1
	sp|Q5E946|PARK7_BOVIN	Protein DJ-1 OS=Bos taurus GN=PARK7 PE=2 SV=1
	sp|Q5E938|EIF1_BOVIN	Eukaryotic translation initiation factor 1 OS=Bos taurus GN=EIF1 PE=3 SV=1
	sp|Q5BIR5|SPB8_BOVIN	Serpin B8 OS=Bos taurus GN=SERPINB8 PE=2 SV=1
	sp|Q5BIN5|PIN1_BOVIN	Peptidyl-prolyl cis-trans isomerase NIMA-interacting 1 OS=Bos taurus GN=PIN1 PE=2 SV=1
	sp|Q5BIM1|TRI45_BOVIN	Tripartite motif-containing protein 45 OS=Bos taurus GN=TRIM45 PE=2 SV=1
	sp|Q59A32|PUR2_BOVIN	Trifunctional purine biosynthetic protein adenosine-3 OS=Bos taurus GN=GART PE=2 SV=1
	sp|Q59A28|QORL1_BOVIN	Quinone oxidoreductase-like protein 1 OS=Bos taurus GN=CRYZL1 PE=2 SV=1
	sp|Q58DW5|RL5_BOVIN	60S ribosomal protein L5 OS=Bos taurus GN=RPL5 PE=2 SV=3
	sp|Q58DW3|RL29_BOVIN	60S ribosomal protein L29 OS=Bos taurus GN=RPL29 PE=2 SV=3
	sp|Q58DW0|RL4_BOVIN	60S ribosomal protein L4 OS=Bos taurus GN=RPL4 PE=2 SV=3
	sp|Q58DV7|HNMT_BOVIN	Histamine N-methyltransferase OS=Bos taurus GN=HNMT PE=2 SV=1
	sp|Q58DU7|SH3L1_BOVIN	SH3 domain-binding glutamic acid-rich-like protein OS=Bos taurus GN=SH3BGRL PE=3 SV=1
	sp|Q58DU5|PSA3_BOVIN	Proteasome subunit alpha type-3 OS=Bos taurus GN=PSMA3 PE=1 SV=3
	sp|Q58DT1|RL7_BOVIN	60S ribosomal protein L7 OS=Bos taurus GN=RPL7 PE=2 SV=1
	sp|Q58DS9|RAB5C_BOVIN	Ras-related protein Rab-5C OS=Bos taurus GN=RAB5C PE=2 SV=1
	sp|Q58DS5|RAB13_BOVIN	Ras-related protein Rab-13 OS=Bos taurus GN=RAB13 PE=1 SV=1
	sp|Q58DQ3|RL6_BOVIN	60S ribosomal protein L6 OS=Bos taurus GN=RPL6 PE=2 SV=3
	sp|Q58DN4|PPME1_BOVIN	Protein phosphatase methylesterase 1 OS=Bos taurus GN=PPME1 PE=2 SV=3
	sp|Q58DK5|HEM2_BOVIN	Delta-aminolevulinic acid dehydratase OS=Bos taurus GN=ALAD PE=2 SV=1
	sp|Q58DC0|CPPED_BOVIN	Calcineurin-like phosphoesterase domain-containing protein 1 OS=Bos taurus GN=CPPED1 PE=2 SV=1
	sp|Q58DA0|PSMD4_BOVIN	26S proteasome non-ATPase regulatory subunit 4 OS=Bos taurus GN=PSMD4 PE=2 SV=1
	sp|Q58D84|FSTL1_BOVIN	Follistatin-related protein 1 OS=Bos taurus GN=FSTL1 PE=2 SV=1
	sp|Q58D62|FETUB_BOVIN	Fetuin-B OS=Bos taurus GN=FETUB PE=2 SV=1
	sp|Q58D31|DHSO_BOVIN	Sorbitol dehydrogenase OS=Bos taurus GN=SORD PE=2 SV=3
	sp|Q58D08|P5CR3_BOVIN	Pyrroline-5-carboxylate reductase 3 OS=Bos taurus GN=PYCRL PE=2 SV=1
	sp|Q58CY6|PGFS_BOVIN	Prostamide/prostaglandin F synthase OS=Bos taurus GN=FAM213B PE=2 SV=1
	sp|Q58CU2|E41L5_BOVIN	Band 4.1-like protein 5 OS=Bos taurus GN=EPB41L5 PE=2 SV=1
	sp|Q58CQ9|VNN1_BOVIN	Pantetheinase OS=Bos taurus GN=VNN1 PE=2 SV=1
	sp|Q58CQ2|ARC1B_BOVIN	Actin-related protein 2/3 complex subunit 1B OS=Bos taurus GN=ARPC1B PE=1 SV=4
	sp|Q56K14|RLA1_BOVIN	60S acidic ribosomal protein P1 OS=Bos taurus GN=RPLP1 PE=3 SV=1
	sp|Q56K10|RS15_BOVIN	40S ribosomal protein S15 OS=Bos taurus GN=RPS15 PE=2 SV=3
	sp|Q56K04|CRIP1_BOVIN	Cysteine-rich protein 1 OS=Bos taurus GN=CRIP1 PE=3 SV=3
	sp|Q56K03|RL27A_BOVIN	60S ribosomal protein L27a OS=Bos taurus GN=RPL27A PE=2 SV=3
	sp|Q56JZ5|EIF3H_BOVIN	Eukaryotic translation initiation factor 3 subunit H OS=Bos taurus GN=EIF3H PE=2 SV=1
	sp|Q56JZ1|RL13_BOVIN	60S ribosomal protein L13 OS=Bos taurus GN=RPL13 PE=2 SV=3
	sp|Q56JY1|RL35A_BOVIN	60S ribosomal protein L35a OS=Bos taurus GN=RPL35A PE=3 SV=1
	sp|Q56JX8|RS13_BOVIN	40S ribosomal protein S13 OS=Bos taurus GN=RPS13 PE=2 SV=3
	sp|Q56JX6|RS28_BOVIN	40S ribosomal protein S28 OS=Bos taurus GN=RPS28 PE=3 SV=1
	sp|Q56JX5|RS25_BOVIN	40S ribosomal protein S25 OS=Bos taurus GN=RPS25 PE=2 SV=1
	sp|Q56JX3|RL31_BOVIN	60S ribosomal protein L31 OS=Bos taurus GN=RPL31 PE=2 SV=1
	sp|Q56JW4|APT_BOVIN	Adenine phosphoribosyltransferase OS=Bos taurus GN=APRT PE=2 SV=1
	sp|Q56JV9|RS3A_BOVIN	40S ribosomal protein S3a OS=Bos taurus GN=RPS3A PE=2 SV=3
	sp|Q56JV6|TWF1_BOVIN	Twinfilin-1 OS=Bos taurus GN=TWF1 PE=2 SV=1
	sp|Q56JV1|RS26_BOVIN	40S ribosomal protein S26 OS=Bos taurus GN=RPS26 PE=3 SV=3
	sp|Q56JU9|RS24_BOVIN	40S ribosomal protein S24 OS=Bos taurus GN=RPS24 PE=2 SV=2
	sp|Q3ZCL8|SH3L3_BOVIN	SH3 domain-binding glutamic acid-rich-like protein 3 OS=Bos taurus GN=SH3BGRL3 PE=3 SV=1
	sp|Q3ZCK9|PSA4_BOVIN	Proteasome subunit alpha type-4 OS=Bos taurus GN=PSMA4 PE=1 SV=1
	sp|Q3ZCK3|BPNT1_BOVIN	3'(2'),5'-bisphosphate nucleotidase 1 OS=Bos taurus GN=BPNT1 PE=2 SV=1
	sp|Q3ZCK1|EIF3L_BOVIN	Eukaryotic translation initiation factor 3 subunit L OS=Bos taurus GN=EIF3L PE=2 SV=1
	sp|Q3ZCJ2|AK1A1_BOVIN	Alcohol dehydrogenase [NADP(+)] OS=Bos taurus GN=AKR1A1 PE=2 SV=1
	sp|Q3ZCI9|TCPQ_BOVIN	T-complex protein 1 subunit theta OS=Bos taurus GN=CCT8 PE=1 SV=3
	sp|Q3ZCH9|HDHD2_BOVIN	Haloacid dehalogenase-like hydrolase domain-containing protein 2 OS=Bos taurus GN=HDHD2 PE=2 SV=1
	sp|Q3ZCH5|ZA2G_BOVIN	Zinc-alpha-2-glycoprotein OS=Bos taurus GN=AZGP1 PE=2 SV=1
	sp|Q3ZCF7|UB2D3_BOVIN	Ubiquitin-conjugating enzyme E2 D3 OS=Bos taurus GN=UBE2D3 PE=2 SV=1
	sp|Q3ZCF3|SKP1_BOVIN	S-phase kinase-associated protein 1 OS=Bos taurus GN=SKP1 PE=2 SV=1
	sp|Q3ZCF0|DCTN2_BOVIN	Dynactin subunit 2 OS=Bos taurus GN=DCTN2 PE=2 SV=1
	sp|Q3ZCE8|RBM8A_BOVIN	RNA-binding protein 8A OS=Bos taurus GN=RBM8A PE=2 SV=2
	sp|Q3ZCE0|LSM8_BOVIN	U6 snRNA-associated Sm-like protein LSm8 OS=Bos taurus GN=LSM8 PE=3 SV=3
	sp|Q3ZCC9|SEC13_BOVIN	Protein SEC13 homolog OS=Bos taurus GN=SEC13 PE=2 SV=1
	sp|Q3ZCC8|TPPP3_BOVIN	Tubulin polymerization-promoting protein family member 3 OS=Bos taurus GN=TPPP3 PE=1 SV=1
	sp|Q3ZC84|CNDP2_BOVIN	Cytosolic non-specific dipeptidase OS=Bos taurus GN=CNDP2 PE=2 SV=1
	sp|Q3ZC64|EFNA1_BOVIN	Ephrin-A1 OS=Bos taurus GN=EFNA1 PE=2 SV=1
	sp|Q3ZC55|ACTN2_BOVIN	Alpha-actinin-2 OS=Bos taurus GN=ACTN2 PE=2 SV=1
	sp|Q3ZC42|ADHX_BOVIN	Alcohol dehydrogenase class-3 OS=Bos taurus GN=ADH5 PE=2 SV=1
	sp|Q3ZC13|AP2M1_BOVIN	AP-2 complex subunit mu OS=Bos taurus GN=AP2M1 PE=1 SV=1
	sp|Q3ZC09|ENOB_BOVIN	Beta-enolase OS=Bos taurus GN=ENO3 PE=2 SV=1
	sp|Q3ZC07|ACTC_BOVIN	Actin, alpha cardiac muscle 1 OS=Bos taurus GN=ACTC1 PE=2 SV=1
	sp|Q3ZBZ8|STIP1_BOVIN	Stress-induced-phosphoprotein 1 OS=Bos taurus GN=STIP1 PE=2 SV=1
	sp|Q3ZBZ1|CAB45_BOVIN	45 kDa calcium-binding protein OS=Bos taurus GN=SDF4 PE=2 SV=1
	sp|Q3ZBV8|SYTC_BOVIN	Threonine--tRNA ligase, cytoplasmic OS=Bos taurus GN=TARS PE=2 SV=1
	sp|Q3ZBV4|HMGN3_BOVIN	High mobility group nucleosome-binding domain-containing protein 3 OS=Bos taurus GN=HMGN3 PE=2 SV=1
	sp|Q3ZBV1|IST1_BOVIN	IST1 homolog OS=Bos taurus GN=IST1 PE=2 SV=1
	sp|Q3ZBN0|ABRAL_BOVIN	Costars family protein ABRACL OS=Bos taurus GN=ABRACL PE=3 SV=1
	sp|Q3ZBM5|SNX5_BOVIN	Sorting nexin-5 OS=Bos taurus GN=SNX5 PE=2 SV=1
	sp|Q3ZBL4|LZTL1_BOVIN	Leucine zipper transcription factor-like protein 1 OS=Bos taurus GN=LZTFL1 PE=2 SV=1
	sp|Q3ZBL1|MTND_BOVIN	1,2-dihydroxy-3-keto-5-methylthiopentene dioxygenase OS=Bos taurus GN=ADI1 PE=2 SV=2
	sp|Q3ZBH8|RS20_BOVIN	40S ribosomal protein S20 OS=Bos taurus GN=RPS20 PE=3 SV=1
	sp|Q3ZBH0|TCPB_BOVIN	T-complex protein 1 subunit beta OS=Bos taurus GN=CCT2 PE=1 SV=3
	sp|Q3ZBG0|PSA7_BOVIN	Proteasome subunit alpha type-7 OS=Bos taurus GN=PSMA7 PE=1 SV=1
	sp|Q3ZBF9|PLPP_BOVIN	Pyridoxal phosphate phosphatase OS=Bos taurus GN=PDXP PE=1 SV=1
	sp|Q3ZBF7|TEBP_BOVIN	Prostaglandin E synthase 3 OS=Bos taurus GN=PTGES3 PE=1 SV=1
	sp|Q3ZBF0|NADE_BOVIN	Glutamine-dependent NAD(+) synthetase OS=Bos taurus GN=NADSYN1 PE=2 SV=1
	sp|Q3ZBD9|MARE1_BOVIN	Microtubule-associated protein RP/EB family member 1 OS=Bos taurus GN=MAPRE1 PE=2 SV=3
	sp|Q3ZBD7|G6PI_BOVIN	Glucose-6-phosphate isomerase OS=Bos taurus GN=GPI PE=2 SV=4
	sp|Q3ZBD3|PHS_BOVIN	Pterin-4-alpha-carbinolamine dehydratase OS=Bos taurus GN=PCBD1 PE=3 SV=2
	sp|Q3ZBD2|ARP10_BOVIN	Actin-related protein 10 OS=Bos taurus GN=ACTR10 PE=2 SV=1
	sp|Q3ZBD0|PSMD7_BOVIN	26S proteasome non-ATPase regulatory subunit 7 OS=Bos taurus GN=PSMD7 PE=2 SV=1
	sp|Q3ZBA8|NDRG2_BOVIN	Protein NDRG2 OS=Bos taurus GN=NDRG2 PE=2 SV=1
	sp|Q3Y5Z3|ADIPO_BOVIN	Adiponectin OS=Bos taurus GN=ADIPOQ PE=1 SV=1
	sp|Q3T199|RS23_BOVIN	40S ribosomal protein S23 OS=Bos taurus GN=RPS23 PE=2 SV=1
	sp|Q3T178|VPS28_BOVIN	Vacuolar protein sorting-associated protein 28 homolog OS=Bos taurus GN=VPS28 PE=2 SV=1
	sp|Q3T171|RL36_BOVIN	60S ribosomal protein L36 OS=Bos taurus GN=RPL36 PE=3 SV=3
	sp|Q3T169|RS3_BOVIN	40S ribosomal protein S3 OS=Bos taurus GN=RPS3 PE=2 SV=1
	sp|Q3T168|CYBP_BOVIN	Calcyclin-binding protein OS=Bos taurus GN=CACYBP PE=2 SV=1
	sp|Q3T149|HSPB1_BOVIN	Heat shock protein beta-1 OS=Bos taurus GN=HSPB1 PE=2 SV=1
	sp|Q3T147|DX39B_BOVIN	Spliceosome RNA helicase DDX39B OS=Bos taurus GN=DDX39B PE=2 SV=1
	sp|Q3T145|MDHC_BOVIN	Malate dehydrogenase, cytoplasmic OS=Bos taurus GN=MDH1 PE=2 SV=3
	sp|Q3T140|DLRB1_BOVIN	Dynein light chain roadblock-type 1 OS=Bos taurus GN=DYNLRB1 PE=3 SV=1
	sp|Q3T122|EIF3D_BOVIN	Eukaryotic translation initiation factor 3 subunit D OS=Bos taurus GN=EIF3D PE=2 SV=1
	sp|Q3T114|UK114_BOVIN	Ribonuclease UK114 OS=Bos taurus GN=HRSP12 PE=2 SV=3
	sp|Q3T108|PSB4_BOVIN	Proteasome subunit beta type-4 OS=Bos taurus GN=PSMB4 PE=1 SV=1
	sp|Q3T102|EIF3E_BOVIN	Eukaryotic translation initiation factor 3 subunit E OS=Bos taurus GN=EIF3E PE=2 SV=1
	sp|Q3T0Z7|DHPR_BOVIN	Dihydropteridine reductase OS=Bos taurus GN=QDPR PE=2 SV=1
	sp|Q3T0Y5|PSA2_BOVIN	Proteasome subunit alpha type-2 OS=Bos taurus GN=PSMA2 PE=1 SV=3
	sp|Q3T0X6|RS16_BOVIN	40S ribosomal protein S16 OS=Bos taurus GN=RPS16 PE=2 SV=3
	sp|Q3T0X5|PSA1_BOVIN	Proteasome subunit alpha type-1 OS=Bos taurus GN=PSMA1 PE=1 SV=1
	sp|Q3T0W9|RL19_BOVIN	60S ribosomal protein L19 OS=Bos taurus GN=RPL19 PE=2 SV=1
	sp|Q3T0W4|PP1R7_BOVIN	Protein phosphatase 1 regulatory subunit 7 OS=Bos taurus GN=PPP1R7 PE=1 SV=1
	sp|Q3T0V4|RS11_BOVIN	40S ribosomal protein S11 OS=Bos taurus GN=RPS11 PE=2 SV=3
	sp|Q3T0V3|EIF3K_BOVIN	Eukaryotic translation initiation factor 3 subunit K OS=Bos taurus GN=EIF3K PE=2 SV=1
	sp|Q3T0U7|FA96A_BOVIN	MIP18 family protein FAM96A OS=Bos taurus GN=FAM96A PE=2 SV=1
	sp|Q3T0U2|RL14_BOVIN	60S ribosomal protein L14 OS=Bos taurus GN=RPL14 PE=2 SV=3
	sp|Q3T0T1|PSB10_BOVIN	Proteasome subunit beta type-10 OS=Bos taurus GN=PSMB10 PE=1 SV=1
	sp|Q3T0S6|RL8_BOVIN	60S ribosomal protein L8 OS=Bos taurus GN=RPL8 PE=2 SV=3
	sp|Q3T0R1|RS18_BOVIN	40S ribosomal protein S18 OS=Bos taurus GN=RPS18 PE=2 SV=3
	sp|Q3T0Q6|CNBP_BOVIN	Cellular nucleic acid-binding protein OS=Bos taurus GN=CNBP PE=2 SV=1
	sp|Q3T0Q4|NDKB_BOVIN	Nucleoside diphosphate kinase B OS=Bos taurus GN=NME2 PE=1 SV=1
	sp|Q3T0P6|PGK1_BOVIN	Phosphoglycerate kinase 1 OS=Bos taurus GN=PGK1 PE=2 SV=3
	sp|Q3T0P5|CASP6_BOVIN	Caspase-6 OS=Bos taurus GN=CASP6 PE=2 SV=1
	sp|Q3T0M7|RANG_BOVIN	Ran-specific GTPase-activating protein OS=Bos taurus GN=RANBP1 PE=2 SV=1
	sp|Q3T0M0|VPS29_BOVIN	Vacuolar protein sorting-associated protein 29 OS=Bos taurus GN=VPS29 PE=2 SV=1
	sp|Q3T0L7|RL28_BOVIN	60S ribosomal protein L28 OS=Bos taurus GN=RPL28 PE=2 SV=3
	sp|Q3T0L2|ERP44_BOVIN	Endoplasmic reticulum resident protein 44 OS=Bos taurus GN=ERP44 PE=2 SV=1
	sp|Q3T0K2|TCPG_BOVIN	T-complex protein 1 subunit gamma OS=Bos taurus GN=CCT3 PE=1 SV=1
	sp|Q3T0I5|FIS1_BOVIN	Mitochondrial fission 1 protein OS=Bos taurus GN=FIS1 PE=2 SV=1
	sp|Q3T0G5|PROSC_BOVIN	Proline synthase co-transcribed bacterial homolog protein OS=Bos taurus GN=PROSC PE=2 SV=1
	sp|Q3T0F7|MTPN_BOVIN	Myotrophin OS=Bos taurus GN=MTPN PE=1 SV=3
	sp|Q3T0F4|RS10_BOVIN	40S ribosomal protein S10 OS=Bos taurus GN=RPS10 PE=2 SV=1
	sp|Q3T0E7|PP1A_BOVIN	Serine/threonine-protein phosphatase PP1-alpha catalytic subunit OS=Bos taurus GN=PPP1CA PE=2 SV=1
	sp|Q3T0E0|ATOX1_BOVIN	Copper transport protein ATOX1 OS=Bos taurus GN=ATOX1 PE=3 SV=1
	sp|Q3T0D5|RL30_BOVIN	60S ribosomal protein L30 OS=Bos taurus GN=RPL30 PE=3 SV=3
	sp|Q3T0D0|HNRPK_BOVIN	Heterogeneous nuclear ribonucleoprotein K OS=Bos taurus GN=HNRNPK PE=2 SV=1
	sp|Q3T0C7|STMN1_BOVIN	Stathmin OS=Bos taurus GN=STMN1 PE=2 SV=3
	sp|Q3T0B2|PSMD6_BOVIN	26S proteasome non-ATPase regulatory subunit 6 OS=Bos taurus GN=PSMD6 PE=2 SV=1
	sp|Q3T0A3|CFAD_BOVIN	Complement factor D OS=Bos taurus GN=CFD PE=2 SV=1
	sp|Q3T087|RL11_BOVIN	60S ribosomal protein L11 OS=Bos taurus GN=RPL11 PE=2 SV=3
	sp|Q3T057|RL23_BOVIN	60S ribosomal protein L23 OS=Bos taurus GN=RPL23 PE=2 SV=2
	sp|Q3T054|RAN_BOVIN	GTP-binding nuclear protein Ran OS=Bos taurus GN=RAN PE=2 SV=3
	sp|Q3T052|ITIH4_BOVIN	Inter-alpha-trypsin inhibitor heavy chain H4 OS=Bos taurus GN=ITIH4 PE=1 SV=1
	sp|Q3T051|RL39_BOVIN	60S ribosomal protein L39 OS=Bos taurus GN=RPL39 PE=3 SV=3
	sp|Q3T046|BDH2_BOVIN	3-hydroxybutyrate dehydrogenase type 2 OS=Bos taurus GN=BDH2 PE=2 SV=1
	sp|Q3T035|ARPC3_BOVIN	Actin-related protein 2/3 complex subunit 3 OS=Bos taurus GN=ARPC3 PE=1 SV=3
	sp|Q3T030|PRS6B_BOVIN	26S protease regulatory subunit 6B OS=Bos taurus GN=PSMC4 PE=2 SV=1
	sp|Q3T025|RL17_BOVIN	60S ribosomal protein L17 OS=Bos taurus GN=RPL17 PE=2 SV=3
	sp|Q3T024|ROP1L_BOVIN	Ropporin-1-like protein OS=Bos taurus GN=ROPN1L PE=2 SV=1
	sp|Q3T005|PDLI4_BOVIN	PDZ and LIM domain protein 4 OS=Bos taurus GN=PDLIM4 PE=2 SV=1
	sp|Q3T003|RL18A_BOVIN	60S ribosomal protein L18a OS=Bos taurus GN=RPL18A PE=2 SV=1
	sp|Q3SZX2|IPP2_BOVIN	Protein phosphatase inhibitor 2 OS=Bos taurus GN=PPP1R2 PE=2 SV=1
	sp|Q3SZV7|HEMO_BOVIN	Hemopexin OS=Bos taurus GN=HPX PE=2 SV=1
	sp|Q3SZV3|EF1G_BOVIN	Elongation factor 1-gamma OS=Bos taurus GN=EEF1G PE=2 SV=1
	sp|Q3SZR3|A1AG_BOVIN	Alpha-1-acid glycoprotein OS=Bos taurus GN=ORM1 PE=2 SV=1
	sp|Q3SZQ6|RL32_BOVIN	60S ribosomal protein L32 OS=Bos taurus GN=RPL32 PE=2 SV=3
	sp|Q3SZN2|SC23B_BOVIN	Protein transport protein Sec23B OS=Bos taurus GN=SEC23B PE=2 SV=1
	sp|Q3SZK8|NHRF1_BOVIN	Na(+)/H(+) exchange regulatory cofactor NHE-RF1 OS=Bos taurus GN=SLC9A3R1 PE=2 SV=1
	sp|Q3SZJ9|PMM2_BOVIN	Phosphomannomutase 2 OS=Bos taurus GN=PMM2 PE=2 SV=1
	sp|Q3SZJ4|PTGR1_BOVIN	Prostaglandin reductase 1 OS=Bos taurus GN=PTGR1 PE=2 SV=1
	sp|Q3SZJ0|ARLY_BOVIN	Argininosuccinate lyase OS=Bos taurus GN=ASL PE=2 SV=1
	sp|Q3SZI4|1433T_BOVIN	14-3-3 protein theta OS=Bos taurus GN=YWHAQ PE=2 SV=1
	sp|Q3SZI0|MPI_BOVIN	Mannose-6-phosphate isomerase OS=Bos taurus GN=MPI PE=2 SV=3
	sp|Q3SZH7|LKHA4_BOVIN	Leukotriene A-4 hydrolase OS=Bos taurus GN=LTA4H PE=2 SV=3
	sp|Q3SZF2|ARF4_BOVIN	ADP-ribosylation factor 4 OS=Bos taurus GN=ARF4 PE=2 SV=3
	sp|Q3SZE2|PFD1_BOVIN	Prefoldin subunit 1 OS=Bos taurus GN=PFDN1 PE=2 SV=1
	sp|Q3SZC6|AN32B_BOVIN	Acidic leucine-rich nuclear phosphoprotein 32 family member B OS=Bos taurus GN=ANP32B PE=2 SV=1
	sp|Q3SZC4|NSF1C_BOVIN	NSFL1 cofactor p47 OS=Bos taurus GN=NSFL1C PE=2 SV=1
	sp|Q3SZC2|PSB9_BOVIN	Proteasome subunit beta type-9 OS=Bos taurus GN=PSMB9 PE=1 SV=1
	sp|Q3SZB7|F16P1_BOVIN	Fructose-1,6-bisphosphatase 1 OS=Bos taurus GN=FBP1 PE=2 SV=3
	sp|Q3SZA5|SPSY_BOVIN	Spermine synthase OS=Bos taurus GN=SMS PE=2 SV=1
	sp|Q3SZA0|CSN4_BOVIN	COP9 signalosome complex subunit 4 OS=Bos taurus GN=COPS4 PE=2 SV=1
	sp|Q3SZ90|RL13A_BOVIN	60S ribosomal protein L13a OS=Bos taurus GN=RPL13A PE=2 SV=3
	sp|Q3SZ65|IF4A2_BOVIN	Eukaryotic initiation factor 4A-II OS=Bos taurus GN=EIF4A2 PE=2 SV=1
	sp|Q3SZ62|PGAM1_BOVIN	Phosphoglycerate mutase 1 OS=Bos taurus GN=PGAM1 PE=2 SV=3
	sp|Q3SZ59|RL36A_BOVIN	60S ribosomal protein L36a OS=Bos taurus GN=RPL36A PE=3 SV=3
	sp|Q3SZ54|IF4A1_BOVIN	Eukaryotic initiation factor 4A-I OS=Bos taurus GN=EIF4A1 PE=2 SV=1
	sp|Q3SZ43|UB2V2_BOVIN	Ubiquitin-conjugating enzyme E2 variant 2 OS=Bos taurus GN=UBE2V2 PE=2 SV=3
	sp|Q3SZ19|PSMD9_BOVIN	26S proteasome non-ATPase regulatory subunit 9 OS=Bos taurus GN=PSMD9 PE=1 SV=1
	sp|Q3SZ18|HPRT_BOVIN	Hypoxanthine-guanine phosphoribosyltransferase OS=Bos taurus GN=HPRT1 PE=2 SV=3
	sp|Q3SZ16|IAH1_BOVIN	Isoamyl acetate-hydrolyzing esterase 1 homolog OS=Bos taurus GN=IAH1 PE=2 SV=1
	sp|Q3SYX9|ARPC5_BOVIN	Actin-related protein 2/3 complex subunit 5 OS=Bos taurus GN=ARPC5 PE=1 SV=3
	sp|Q3SYW6|EIF3C_BOVIN	Eukaryotic translation initiation factor 3 subunit C OS=Bos taurus GN=EIF3C PE=2 SV=1
	sp|Q3SYV4|CAP1_BOVIN	Adenylyl cyclase-associated protein 1 OS=Bos taurus GN=CAP1 PE=2 SV=3
	sp|Q3SYU9|MVP_BOVIN	Major vault protein OS=Bos taurus GN=MVP PE=2 SV=1
	sp|Q3SYU7|TNPO1_BOVIN	Transportin-1 OS=Bos taurus GN=TNPO1 PE=1 SV=2
	sp|Q3SYU2|EF2_BOVIN	Elongation factor 2 OS=Bos taurus GN=EEF2 PE=2 SV=3
	sp|Q3SYS9|KBP_BOVIN	KIF1-binding protein OS=Bos taurus GN=KBP PE=2 SV=1
	sp|Q3SYR7|RL9_BOVIN	60S ribosomal protein L9 OS=Bos taurus GN=RPL9 PE=2 SV=1
	sp|Q3SX44|DDAH2_BOVIN	N(G),N(G)-dimethylarginine dimethylaminohydrolase 2 OS=Bos taurus GN=DDAH2 PE=2 SV=1
	sp|Q3SWY3|IMDH2_BOVIN	Inosine-5'-monophosphate dehydrogenase 2 OS=Bos taurus GN=IMPDH2 PE=2 SV=1
	sp|Q3SWX8|RBBP7_BOVIN	Histone-binding protein RBBP7 OS=Bos taurus GN=RBBP7 PE=2 SV=1
	sp|Q3SWW9|PP1B_BOVIN	Serine/threonine-protein phosphatase PP1-beta catalytic subunit OS=Bos taurus GN=PPP1CB PE=2 SV=1
	sp|Q3MIC0|RL37A_BOVIN	60S ribosomal protein L37a OS=Bos taurus GN=RPL37A PE=3 SV=3
	sp|Q3MHY1|CSRP1_BOVIN	Cysteine and glycine-rich protein 1 OS=Bos taurus GN=CSRP1 PE=2 SV=3
	sp|Q3MHR7|ARPC2_BOVIN	Actin-related protein 2/3 complex subunit 2 OS=Bos taurus GN=ARPC2 PE=1 SV=1
	sp|Q3MHR0|LYPA1_BOVIN	Acyl-protein thioesterase 1 OS=Bos taurus GN=LYPLA1 PE=2 SV=1
	sp|Q3MHP3|S10AE_BOVIN	Protein S100-A14 OS=Bos taurus GN=S100A14 PE=3 SV=1
	sp|Q3MHP2|RB11B_BOVIN	Ras-related protein Rab-11B OS=Bos taurus GN=RAB11B PE=2 SV=3
	sp|Q3MHP1|UB2L3_BOVIN	Ubiquitin-conjugating enzyme E2 L3 OS=Bos taurus GN=UBE2L3 PE=2 SV=1
	sp|Q3MHN2|CO9_BOVIN	Complement component C9 OS=Bos taurus GN=C9 PE=2 SV=1
	sp|Q3MHN0|PSB6_BOVIN	Proteasome subunit beta type-6 OS=Bos taurus GN=PSMB6 PE=1 SV=1
	sp|Q3MHM7|RL35_BOVIN	60S ribosomal protein L35 OS=Bos taurus GN=RPL35 PE=2 SV=3
	sp|Q3MHM5|TBB4B_BOVIN	Tubulin beta-4B chain OS=Bos taurus GN=TUBB4B PE=2 SV=1
	sp|Q3MHL7|TCPZ_BOVIN	T-complex protein 1 subunit zeta OS=Bos taurus GN=CCT6A PE=1 SV=3
	sp|Q3MHL4|SAHH_BOVIN	Adenosylhomocysteinase OS=Bos taurus GN=AHCY PE=2 SV=3
	sp|Q3MHH4|SYQ_BOVIN	Glutamine--tRNA ligase OS=Bos taurus GN=QARS PE=2 SV=1
	sp|Q3MHF8|LS14A_BOVIN	Protein LSM14 homolog A OS=Bos taurus GN=LSM14A PE=2 SV=1
	sp|Q3MHF7|MTAP_BOVIN	S-methyl-5'-thioadenosine phosphorylase OS=Bos taurus GN=MTAP PE=1 SV=1
	sp|Q3B7N2|ACTN1_BOVIN	Alpha-actinin-1 OS=Bos taurus GN=ACTN1 PE=2 SV=1
	sp|Q3B7M9|PYGB_BOVIN	Glycogen phosphorylase, brain form OS=Bos taurus GN=PYGB PE=2 SV=3
	sp|Q3B7M5|LASP1_BOVIN	LIM and SH3 domain protein 1 OS=Bos taurus GN=LASP1 PE=2 SV=1
	sp|Q3B7M2|GLO2_BOVIN	Hydroxyacylglutathione hydrolase, mitochondrial OS=Bos taurus GN=HAGH PE=2 SV=3
	sp|Q32PI5|2AAA_BOVIN	Serine/threonine-protein phosphatase 2A 65 kDa regulatory subunit A alpha isoform OS=Bos taurus GN=PPP2R1A PE=1 SV=1
	sp|Q32PH8|EF1A2_BOVIN	Elongation factor 1-alpha 2 OS=Bos taurus GN=EEF1A2 PE=2 SV=1
	sp|Q32PF2|ACLY_BOVIN	ATP-citrate synthase OS=Bos taurus GN=ACLY PE=2 SV=1
	sp|Q32PE9|LSM3_BOVIN	U6 snRNA-associated Sm-like protein LSm3 OS=Bos taurus GN=LSM3 PE=3 SV=3
	sp|Q32PD5|RS19_BOVIN	40S ribosomal protein S19 OS=Bos taurus GN=RPS19 PE=2 SV=3
	sp|Q32PC9|AR2BP_BOVIN	ADP-ribosylation factor-like protein 2-binding protein OS=Bos taurus GN=ARL2BP PE=1 SV=2
	sp|Q32PB9|RL38_BOVIN	60S ribosomal protein L38 OS=Bos taurus GN=RPL38 PE=3 SV=4
	sp|Q32PB8|RS21_BOVIN	40S ribosomal protein S21 OS=Bos taurus GN=RPS21 PE=3 SV=1
	sp|Q32PA9|FKBP2_BOVIN	Peptidyl-prolyl cis-trans isomerase FKBP2 OS=Bos taurus GN=FKBP2 PE=2 SV=1
	sp|Q32PA8|AAMDC_BOVIN	Mth938 domain-containing protein OS=Bos taurus GN=AAMDC PE=2 SV=1
	sp|Q32PA4|PHP14_BOVIN	14 kDa phosphohistidine phosphatase OS=Bos taurus GN=PHPT1 PE=2 SV=1
	sp|Q32P85|DLRB2_BOVIN	Dynein light chain roadblock-type 2 OS=Bos taurus GN=DYNLRB2 PE=3 SV=1
	sp|Q32LP2|RADI_BOVIN	Radixin OS=Bos taurus GN=RDX PE=2 SV=1
	sp|Q32LM2|SGTA_BOVIN	Small glutamine-rich tetratricopeptide repeat-containing protein alpha OS=Bos taurus GN=SGTA PE=2 SV=1
	sp|Q32LK1|AASD1_BOVIN	Alanyl-tRNA editing protein Aarsd1 OS=Bos taurus GN=AARSD1 PE=2 SV=1
	sp|Q32LH4|NIT1_BOVIN	Nitrilase homolog 1 OS=Bos taurus GN=NIT1 PE=2 SV=1
	sp|Q32LG3|MDHM_BOVIN	Malate dehydrogenase, mitochondrial OS=Bos taurus GN=MDH2 PE=1 SV=1
	sp|Q32LE5|ASGL1_BOVIN	Isoaspartyl peptidase/L-asparaginase OS=Bos taurus GN=ASRGL1 PE=2 SV=1
	sp|Q32L99|PTGR2_BOVIN	Prostaglandin reductase 2 OS=Bos taurus GN=PTGR2 PE=2 SV=1
	sp|Q32L93|GMPR2_BOVIN	GMP reductase 2 OS=Bos taurus GN=GMPR2 PE=2 SV=1
	sp|Q32L41|GFRP_BOVIN	GTP cyclohydrolase 1 feedback regulatory protein OS=Bos taurus GN=GCHFR PE=3 SV=1
	sp|Q32L09|CS066_BOVIN	UPF0515 protein C19orf66 homolog OS=Bos taurus PE=2 SV=1
	sp|Q32KY3|MLF1_BOVIN	Myeloid leukemia factor 1 OS=Bos taurus GN=MLF1 PE=2 SV=1
	sp|Q32KY0|APOD_BOVIN	Apolipoprotein D OS=Bos taurus GN=APOD PE=2 SV=1
	sp|Q32KX8|CP013_BOVIN	UPF0585 protein C16orf13 homolog OS=Bos taurus PE=2 SV=1
	sp|Q32KW2|UBXN1_BOVIN	UBX domain-containing protein 1 OS=Bos taurus GN=UBXN1 PE=2 SV=1
	sp|Q32KV0|PGAM2_BOVIN	Phosphoglycerate mutase 2 OS=Bos taurus GN=PGAM2 PE=2 SV=1
	sp|Q32KS0|TBCE_BOVIN	Tubulin-specific chaperone E OS=Bos taurus GN=TBCE PE=2 SV=1
	sp|Q32KP9|NTF2_BOVIN	Nuclear transport factor 2 OS=Bos taurus GN=NUTF2 PE=2 SV=1
	sp|Q32KL2|PSB5_BOVIN	Proteasome subunit beta type-5 OS=Bos taurus GN=PSMB5 PE=1 SV=1
	sp|Q2YDM1|ARL1_BOVIN	ADP-ribosylation factor-like protein 1 OS=Bos taurus GN=ARL1 PE=2 SV=1
	sp|Q2YDG0|GPC5C_BOVIN	G-protein coupled receptor family C group 5 member C OS=Bos taurus GN=GPRC5C PE=2 SV=2
	sp|Q2YDE9|TES_BOVIN	Testin OS=Bos taurus GN=TES PE=2 SV=1
	sp|Q2YDE4|PSA6_BOVIN	Proteasome subunit alpha type-6 OS=Bos taurus GN=PSMA6 PE=1 SV=1
	sp|Q2YDD1|FR1OP_BOVIN	FGFR1 oncogene partner OS=Bos taurus GN=FGFR1OP PE=2 SV=1
	sp|Q2UVX4|CO3_BOVIN	Complement C3 OS=Bos taurus GN=C3 PE=1 SV=2
	sp|Q2TBX2|PFD3_BOVIN	Prefoldin subunit 3 OS=Bos taurus GN=VBP1 PE=2 SV=1
	sp|Q2TBW7|SNX2_BOVIN	Sorting nexin-2 OS=Bos taurus GN=SNX2 PE=2 SV=1
	sp|Q2TBW6|ARL3_BOVIN	ADP-ribosylation factor-like protein 3 OS=Bos taurus GN=ARL3 PE=2 SV=1
	sp|Q2TBW0|ATX10_BOVIN	Ataxin-10 OS=Bos taurus GN=ATXN10 PE=2 SV=1
	sp|Q2TBU0|HPT_BOVIN	Haptoglobin OS=Bos taurus GN=HP PE=2 SV=1
	sp|Q2TBR8|CALR3_BOVIN	Calreticulin-3 OS=Bos taurus GN=CALR3 PE=2 SV=1
	sp|Q2TBQ8|6PGL_BOVIN	6-phosphogluconolactonase OS=Bos taurus GN=PGLS PE=2 SV=1
	sp|Q2TBQ5|RL7A_BOVIN	60S ribosomal protein L7a OS=Bos taurus GN=RPL7A PE=2 SV=3
	sp|Q2TBQ3|GAMT_BOVIN	Guanidinoacetate N-methyltransferase OS=Bos taurus GN=GAMT PE=2 SV=1
	sp|Q2TBN9|IFT43_BOVIN	Intraflagellar transport protein 43 homolog OS=Bos taurus GN=IFT43 PE=2 SV=1
	sp|Q2TBN5|COMD9_BOVIN	COMM domain-containing protein 9 OS=Bos taurus GN=COMMD9 PE=2 SV=1
	sp|Q2TBN3|CETN2_BOVIN	Centrin-2 OS=Bos taurus GN=CETN2 PE=2 SV=1
	sp|Q2TBG8|UCHL3_BOVIN	Ubiquitin carboxyl-terminal hydrolase isozyme L3 OS=Bos taurus GN=UCHL3 PE=2 SV=1
	sp|Q2TA49|VASP_BOVIN	Vasodilator-stimulated phosphoprotein OS=Bos taurus GN=VASP PE=2 SV=3
	sp|Q2TA37|ARL2_BOVIN	ADP-ribosylation factor-like protein 2 OS=Bos taurus GN=ARL2 PE=1 SV=1
	sp|Q2T9Y6|GSH0_BOVIN	Glutamate--cysteine ligase regulatory subunit OS=Bos taurus GN=GCLM PE=2 SV=1
	sp|Q2T9W2|THUM3_BOVIN	THUMP domain-containing protein 3 OS=Bos taurus GN=THUMPD3 PE=2 SV=1
	sp|Q2T9V8|DTD1_BOVIN	D-tyrosyl-tRNA(Tyr) deacylase 1 OS=Bos taurus GN=DTD1 PE=2 SV=1
	sp|Q2T9T9|FBXW9_BOVIN	F-box/WD repeat-containing protein 9 OS=Bos taurus GN=FBXW9 PE=2 SV=1
	sp|Q2T9S4|PGP_BOVIN	Phosphoglycolate phosphatase OS=Bos taurus GN=PGP PE=2 SV=1
	sp|Q2T9S0|TBB3_BOVIN	Tubulin beta-3 chain OS=Bos taurus GN=TUBB3 PE=2 SV=1
	sp|Q2T9L8|SYMC_BOVIN	Methionine--tRNA ligase, cytoplasmic OS=Bos taurus GN=MARS PE=2 SV=1
	sp|Q2NL31|MTNA_BOVIN	Methylthioribose-1-phosphate isomerase OS=Bos taurus GN=MRI1 PE=2 SV=1
	sp|Q2NL29|INO1_BOVIN	Inositol-3-phosphate synthase 1 OS=Bos taurus GN=ISYNA1 PE=2 SV=1
	sp|Q2NL24|PSMG2_BOVIN	Proteasome assembly chaperone 2 OS=Bos taurus GN=PSMG2 PE=2 SV=1
	sp|Q2NKZ1|TCPH_BOVIN	T-complex protein 1 subunit eta OS=Bos taurus GN=CCT7 PE=1 SV=1
	sp|Q2NKY7|SEPT2_BOVIN	Septin-2 OS=Bos taurus GN=SEPT2 PE=2 SV=1
	sp|Q2LGB5|TOLIP_BOVIN	Toll-interacting protein OS=Bos taurus GN=TOLLIP PE=2 SV=1
	sp|Q2KJJ9|F16P2_BOVIN	Fructose-1,6-bisphosphatase isozyme 2 OS=Bos taurus GN=FBP2 PE=2 SV=1
	sp|Q2KJI2|STT3A_BOVIN	Dolichyl-diphosphooligosaccharide--protein glycosyltransferase subunit STT3A OS=Bos taurus GN=STT3A PE=2 SV=1
	sp|Q2KJH9|AL9A1_BOVIN	4-trimethylaminobutyraldehyde dehydrogenase OS=Bos taurus GN=ALDH9A1 PE=2 SV=1
	sp|Q2KJH6|SERPH_BOVIN	Serpin H1 OS=Bos taurus GN=SERPINH1 PE=2 SV=1
	sp|Q2KJH4|WDR1_BOVIN	WD repeat-containing protein 1 OS=Bos taurus GN=WDR1 PE=2 SV=3
	sp|Q2KJG3|SYNC_BOVIN	Asparagine--tRNA ligase, cytoplasmic OS=Bos taurus GN=NARS PE=2 SV=3
	sp|Q2KJG2|UFM1_BOVIN	Ubiquitin-fold modifier 1 OS=Bos taurus GN=UFM1 PE=3 SV=1
	sp|Q2KJF1|A1BG_BOVIN	Alpha-1B-glycoprotein OS=Bos taurus GN=A1BG PE=1 SV=1
	sp|Q2KJD0|TBB5_BOVIN	Tubulin beta-5 chain OS=Bos taurus GN=TUBB5 PE=2 SV=1
	sp|Q2KJ93|CDC42_BOVIN	Cell division control protein 42 homolog OS=Bos taurus GN=CDC42 PE=1 SV=1
	sp|Q2KJ46|PSMD3_BOVIN	26S proteasome non-ATPase regulatory subunit 3 OS=Bos taurus GN=PSMD3 PE=2 SV=1
	sp|Q2KJ44|PTPA_BOVIN	Serine/threonine-protein phosphatase 2A activator OS=Bos taurus GN=PPP2R4 PE=2 SV=1
	sp|Q2KJ32|SBP1_BOVIN	Selenium-binding protein 1 OS=Bos taurus GN=SELENBP1 PE=1 SV=1
	sp|Q2KJ25|PSD12_BOVIN	26S proteasome non-ATPase regulatory subunit 12 OS=Bos taurus GN=PSMD12 PE=2 SV=3
	sp|Q2KJ22|FA63A_BOVIN	Protein FAM63A OS=Bos taurus GN=FAM63A PE=2 SV=1
	sp|Q2KIY7|BT3L4_BOVIN	Transcription factor BTF3 homolog 4 OS=Bos taurus GN=BTF3L4 PE=2 SV=1
	sp|Q2KIX7|HP251_BOVIN	Protein HP-25 homolog 1 OS=Bos taurus PE=1 SV=1
	sp|Q2KIW9|KCY_BOVIN	UMP-CMP kinase OS=Bos taurus GN=CMPK1 PE=2 SV=2
	sp|Q2KIU7|RSPH9_BOVIN	Radial spoke head protein 9 homolog OS=Bos taurus GN=RSPH9 PE=2 SV=1
	sp|Q2KIU3|HP252_BOVIN	Protein HP-25 homolog 2 OS=Bos taurus PE=2 SV=1
	sp|Q2KIT0|HP20_BOVIN	Protein HP-20 homolog OS=Bos taurus PE=2 SV=1
	sp|Q2KIS7|TETN_BOVIN	Tetranectin OS=Bos taurus GN=CLEC3B PE=2 SV=1
	sp|Q2KIK0|SUGT1_BOVIN	Suppressor of G2 allele of SKP1 homolog OS=Bos taurus GN=SUGT1 PE=2 SV=1
	sp|Q2KII4|ELOC_BOVIN	Transcription elongation factor B polypeptide 1 OS=Bos taurus GN=TCEB1 PE=3 SV=1
	sp|Q2KID4|DNAL1_BOVIN	Dynein light chain 1, axonemal OS=Bos taurus GN=DNAL1 PE=2 SV=1
	sp|Q2KIB0|FAHD2_BOVIN	Fumarylacetoacetate hydrolase domain-containing protein 2 OS=Bos taurus GN=FAHD2 PE=2 SV=1
	sp|Q2KIA5|DNM1L_BOVIN	Dynamin-1-like protein OS=Bos taurus GN=DNM1L PE=2 SV=1
	sp|Q2KIA2|TR112_BOVIN	tRNA methyltransferase 112 homolog OS=Bos taurus GN=TRMT112 PE=2 SV=1
	sp|Q2KI84|SYHC_BOVIN	Histidine--tRNA ligase, cytoplasmic OS=Bos taurus GN=HARS PE=2 SV=1
	sp|Q2KI42|PSD11_BOVIN	26S proteasome non-ATPase regulatory subunit 11 OS=Bos taurus GN=PSMD11 PE=2 SV=3
	sp|Q2KHU8|IF2G_BOVIN	Eukaryotic translation initiation factor 2 subunit 3 OS=Bos taurus GN=EIF2S3 PE=2 SV=1
	sp|Q2HJJ0|KLC4_BOVIN	Kinesin light chain 4 OS=Bos taurus GN=KLC4 PE=2 SV=2
	sp|Q2HJH3|CK054_BOVIN	Ester hydrolase C11orf54 homolog OS=Bos taurus PE=2 SV=1
	sp|Q2HJH2|RAB1B_BOVIN	Ras-related protein Rab-1B OS=Bos taurus GN=RAB1B PE=2 SV=1
	sp|Q2HJH1|DNPEP_BOVIN	Aspartyl aminopeptidase OS=Bos taurus GN=DNPEP PE=1 SV=1
	sp|Q2HJG5|VPS35_BOVIN	Vacuolar protein sorting-associated protein 35 OS=Bos taurus GN=VPS35 PE=2 SV=1
	sp|Q2HJF7|KCC2D_BOVIN	Calcium/calmodulin-dependent protein kinase type II subunit delta OS=Bos taurus GN=CAMK2D PE=2 SV=1
	sp|Q2HJB0|MBLC1_BOVIN	Metallo-beta-lactamase domain-containing protein 1 OS=Bos taurus GN=MBLAC1 PE=2 SV=1
	sp|Q2HJ94|DNJA2_BOVIN	DnaJ homolog subfamily A member 2 OS=Bos taurus GN=DNAJA2 PE=2 SV=1
	sp|Q2HJ86|TBA1D_BOVIN	Tubulin alpha-1D chain OS=Bos taurus GN=TUBA1D PE=1 SV=1
	sp|Q2HJ81|TBB6_BOVIN	Tubulin beta-6 chain OS=Bos taurus GN=TUBB6 PE=2 SV=1
	sp|Q2HJ60|ROA2_BOVIN	Heterogeneous nuclear ribonucleoproteins A2/B1 OS=Bos taurus GN=HNRNPA2B1 PE=2 SV=1
	sp|Q2HJ58|PRPS1_BOVIN	Ribose-phosphate pyrophosphokinase 1 OS=Bos taurus GN=PRPS1 PE=2 SV=3
	sp|Q2HJ57|COTL1_BOVIN	Coactosin-like protein OS=Bos taurus GN=COTL1 PE=2 SV=3
	sp|Q2HJ54|PIPNA_BOVIN	Phosphatidylinositol transfer protein alpha isoform OS=Bos taurus GN=PITPNA PE=1 SV=3
	sp|Q2HJ49|MOES_BOVIN	Moesin OS=Bos taurus GN=MSN PE=2 SV=3
	sp|Q2HJ47|DENR_BOVIN	Density-regulated protein OS=Bos taurus GN=DENR PE=2 SV=1
	sp|Q2HJ33|OLA1_BOVIN	Obg-like ATPase 1 OS=Bos taurus GN=OLA1 PE=2 SV=1
	sp|Q29S21|K2C7_BOVIN	Keratin, type II cytoskeletal 7 OS=Bos taurus GN=KRT7 PE=2 SV=1
	sp|Q29S11|NUCKS_BOVIN	Nuclear ubiquitous casein and cyclin-dependent kinase substrate 1 OS=Bos taurus GN=NUCKS1 PE=2 SV=1
	sp|Q29S00|OSCP1_BOVIN	Protein OSCP1 OS=Bos taurus GN=OSCP1 PE=2 SV=1
	sp|Q29RU4|CO6_BOVIN	Complement component C6 OS=Bos taurus GN=C6 PE=2 SV=1
	sp|Q29RQ1|CO7_BOVIN	Complement component C7 OS=Bos taurus GN=C7 PE=2 SV=1
	sp|Q29RL2|CHRD1_BOVIN	Cysteine and histidine-rich domain-containing protein 1 OS=Bos taurus GN=CHORDC1 PE=2 SV=1
	sp|Q29RK4|RD23B_BOVIN	UV excision repair protein RAD23 homolog B OS=Bos taurus GN=RAD23B PE=2 SV=1
	sp|Q29RI9|MAT2B_BOVIN	Methionine adenosyltransferase 2 subunit beta OS=Bos taurus GN=MAT2B PE=2 SV=1
	sp|Q29RI6|CAB39_BOVIN	Calcium-binding protein 39 OS=Bos taurus GN=CAB39 PE=2 SV=1
	sp|Q29465|SYYC_BOVIN	Tyrosine--tRNA ligase, cytoplasmic OS=Bos taurus GN=YARS PE=2 SV=4
	sp|Q29460|PA1B3_BOVIN	Platelet-activating factor acetylhydrolase IB subunit gamma OS=Bos taurus GN=PAFAH1B3 PE=1 SV=1
	sp|Q29437|AOCX_BOVIN	Primary amine oxidase, liver isozyme OS=Bos taurus PE=1 SV=1
	sp|Q28205|TBCD_BOVIN	Tubulin-specific chaperone D OS=Bos taurus GN=TBCD PE=1 SV=1
	sp|Q28198|TPA_BOVIN	Tissue-type plasminogen activator OS=Bos taurus GN=PLAT PE=2 SV=1
	sp|Q28107|FA5_BOVIN	Coagulation factor V OS=Bos taurus GN=F5 PE=1 SV=1
	sp|Q28106|CNTN1_BOVIN	Contactin-1 OS=Bos taurus GN=CNTN1 PE=2 SV=1
	sp|Q28104|COPE_BOVIN	Coatomer subunit epsilon OS=Bos taurus GN=COPE PE=1 SV=3
	sp|Q28085|CFAH_BOVIN	Complement factor H OS=Bos taurus GN=CFH PE=1 SV=3
	sp|Q28065|C4BPA_BOVIN	C4b-binding protein alpha chain OS=Bos taurus GN=C4BPA PE=2 SV=1
	sp|Q28042|OVGP1_BOVIN	Oviduct-specific glycoprotein (Fragment) OS=Bos taurus GN=OVGP1 PE=1 SV=1
	sp|Q28035|GSTA1_BOVIN	Glutathione S-transferase A1 OS=Bos taurus GN=GSTA1 PE=2 SV=3
	sp|Q28034|GLU2B_BOVIN	Glucosidase 2 subunit beta OS=Bos taurus GN=PRKCSH PE=2 SV=1
	sp|Q28024|GBG12_BOVIN	Guanine nucleotide-binding protein G(I)/G(S)/G(O) subunit gamma-12 OS=Bos taurus GN=GNG12 PE=1 SV=2
	sp|Q28022|MFAP5_BOVIN	Microfibrillar-associated protein 5 OS=Bos taurus GN=MFAP5 PE=1 SV=1
	sp|Q28007|DPYD_BOVIN	Dihydropyrimidine dehydrogenase [NADP(+)] OS=Bos taurus GN=DPYD PE=1 SV=1
	sp|Q27975|HS71A_BOVIN	Heat shock 70 kDa protein 1A OS=Bos taurus GN=HSPA1A PE=1 SV=2
	sp|Q27971|CAN2_BOVIN	Calpain-2 catalytic subunit OS=Bos taurus GN=CAPN2 PE=2 SV=2
	sp|Q27970|CAN1_BOVIN	Calpain-1 catalytic subunit OS=Bos taurus GN=CAPN1 PE=1 SV=3
	sp|Q27968|DNJC3_BOVIN	DnaJ homolog subfamily C member 3 OS=Bos taurus GN=DNAJC3 PE=1 SV=1
	sp|Q27966|MYO1C_BOVIN	Unconventional myosin-Ic OS=Bos taurus GN=MYO1C PE=1 SV=3
	sp|Q27965|HS71B_BOVIN	Heat shock 70 kDa protein 1B OS=Bos taurus GN=HSPA1B PE=2 SV=1
	sp|Q27960|NPT2B_BOVIN	Sodium-dependent phosphate transport protein 2B OS=Bos taurus GN=SLC34A2 PE=1 SV=1
	sp|Q27957|TPPP_BOVIN	Tubulin polymerization-promoting protein OS=Bos taurus GN=TPPP PE=1 SV=1
	sp|Q27954|COPA_BOVIN	Coatomer subunit alpha OS=Bos taurus GN=COPA PE=1 SV=1
	sp|Q24K21|DPCD_BOVIN	Protein DPCD OS=Bos taurus GN=DPCD PE=2 SV=1
	sp|Q24K00|NUBP1_BOVIN	Cytosolic Fe-S cluster assembly factor NUBP1 OS=Bos taurus GN=NUBP1 PE=2 SV=1
	sp|Q24JY1|RL23A_BOVIN	60S ribosomal protein L23a OS=Bos taurus GN=RPL23A PE=2 SV=1
	sp|Q1RMS2|PYRG2_BOVIN	CTP synthase 2 OS=Bos taurus GN=CTPS2 PE=2 SV=1
	sp|Q1RMJ6|RHOC_BOVIN	Rho-related GTP-binding protein RhoC OS=Bos taurus GN=RHOC PE=2 SV=1
	sp|Q1RMH8|SNX3_BOVIN	Sorting nexin-3 OS=Bos taurus GN=SNX3 PE=2 SV=3
	sp|Q1LZE1|KCMF1_BOVIN	E3 ubiquitin-protein ligase KCMF1 OS=Bos taurus GN=KCMF1 PE=2 SV=1
	sp|Q1LZB4|IFT46_BOVIN	Intraflagellar transport protein 46 homolog OS=Bos taurus GN=IFT46 PE=2 SV=1
	sp|Q1LZA3|ASNS_BOVIN	Asparagine synthetase [glutamine-hydrolyzing] OS=Bos taurus GN=ASNS PE=2 SV=3
	sp|Q1LZ74|OARD1_BOVIN	O-acetyl-ADP-ribose deacetylase 1 OS=Bos taurus GN=OARD1 PE=2 SV=1
	sp|Q1JQD4|GIPC2_BOVIN	PDZ domain-containing protein GIPC2 OS=Bos taurus GN=GIPC2 PE=2 SV=1
	sp|Q1JQ97|BBS4_BOVIN	Bardet-Biedl syndrome 4 protein homolog OS=Bos taurus GN=BBS4 PE=2 SV=1
	sp|Q1JPJ8|THOP1_BOVIN	Thimet oligopeptidase OS=Bos taurus GN=THOP1 PE=2 SV=3
	sp|Q1JPJ2|XPP1_BOVIN	Xaa-Pro aminopeptidase 1 OS=Bos taurus GN=XPNPEP1 PE=2 SV=1
	sp|Q1JPH6|IF4H_BOVIN	Eukaryotic translation initiation factor 4H OS=Bos taurus GN=EIF4H PE=2 SV=1
	sp|Q1JPB0|ILEU_BOVIN	Leukocyte elastase inhibitor OS=Bos taurus GN=SERPINB1 PE=2 SV=2
	sp|Q1JPA0|AL3B1_BOVIN	Aldehyde dehydrogenase family 3 member B1 OS=Bos taurus GN=ALDH3B1 PE=2 SV=1
	sp|Q1JP79|ARC1A_BOVIN	Actin-related protein 2/3 complex subunit 1A OS=Bos taurus GN=ARPC1A PE=2 SV=1
	sp|Q1JP75|DCXR_BOVIN	L-xylulose reductase OS=Bos taurus GN=DCXR PE=2 SV=1
	sp|Q17R07|ARFG3_BOVIN	ADP-ribosylation factor GTPase-activating protein 3 OS=Bos taurus GN=ARFGAP3 PE=2 SV=1
	sp|Q17QS0|SCRN3_BOVIN	Secernin-3 OS=Bos taurus GN=SCRN3 PE=2 SV=1
	sp|Q17QL1|GNPI2_BOVIN	Glucosamine-6-phosphate isomerase 2 OS=Bos taurus GN=GNPDA2 PE=2 SV=1
	sp|Q17QK8|SPRE_BOVIN	Sepiapterin reductase OS=Bos taurus GN=SPR PE=2 SV=1
	sp|Q17QK6|FBX2_BOVIN	F-box only protein 2 OS=Bos taurus GN=FBXO2 PE=2 SV=1
	sp|Q17QG2|NUDC_BOVIN	Nuclear migration protein nudC OS=Bos taurus GN=NUDC PE=2 SV=1
	sp|Q148J6|ARPC4_BOVIN	Actin-related protein 2/3 complex subunit 4 OS=Bos taurus GN=ARPC4 PE=1 SV=3
	sp|Q148G4|TATD1_BOVIN	Putative deoxyribonuclease TATDN1 OS=Bos taurus GN=TATDN1 PE=2 SV=1
	sp|Q148F8|HSPB6_BOVIN	Heat shock protein beta-6 OS=Bos taurus GN=HSPB6 PE=2 SV=1
	sp|Q148C9|HEBP1_BOVIN	Heme-binding protein 1 OS=Bos taurus GN=HEBP1 PE=2 SV=1
	sp|Q0VFX8|CRIP2_BOVIN	Cysteine-rich protein 2 OS=Bos taurus GN=CRIP2 PE=2 SV=1
	sp|Q0VD48|VPS4B_BOVIN	Vacuolar protein sorting-associated protein 4B OS=Bos taurus GN=VPS4B PE=2 SV=1
	sp|Q0VD30|CCZ1_BOVIN	Vacuolar fusion protein CCZ1 homolog OS=Bos taurus GN=CCZ1 PE=2 SV=1
	sp|Q0VD27|ENOPH_BOVIN	Enolase-phosphatase E1 OS=Bos taurus GN=ENOPH1 PE=2 SV=1
	sp|Q0VD22|STK33_BOVIN	Serine/threonine-protein kinase 33 OS=Bos taurus GN=STK33 PE=2 SV=1
	sp|Q0VD18|LHPP_BOVIN	Phospholysine phosphohistidine inorganic pyrophosphate phosphatase OS=Bos taurus GN=LHPP PE=1 SV=1
	sp|Q0VCX4|CTNB1_BOVIN	Catenin beta-1 OS=Bos taurus GN=CTNNB1 PE=1 SV=1
	sp|Q0VCX2|GRP78_BOVIN	78 kDa glucose-regulated protein OS=Bos taurus GN=HSPA5 PE=2 SV=1
	sp|Q0VCX1|C1S_BOVIN	Complement C1s subcomponent OS=Bos taurus GN=C1S PE=2 SV=2
	sp|Q0VCU1|ACOC_BOVIN	Cytoplasmic aconitate hydratase OS=Bos taurus GN=ACO1 PE=2 SV=1
	sp|Q0VCP4|SEPT8_BOVIN	Septin-8 OS=Bos taurus GN=SEPT8 PE=2 SV=3
	sp|Q0VCN3|IFT27_BOVIN	Intraflagellar transport protein 27 homolog OS=Bos taurus GN=IFT27 PE=2 SV=1
	sp|Q0VCN1|NMRL1_BOVIN	NmrA-like family domain-containing protein 1 OS=Bos taurus GN=NMRAL1 PE=2 SV=1
	sp|Q0VCM4|PYGL_BOVIN	Glycogen phosphorylase, liver form OS=Bos taurus GN=PYGL PE=2 SV=1
	sp|Q0VCM0|S10AG_BOVIN	Protein S100-A16 OS=Bos taurus GN=S100A16 PE=3 SV=1
	sp|Q0VCK5|AP2A2_BOVIN	AP-2 complex subunit alpha-2 OS=Bos taurus GN=AP2A2 PE=1 SV=1
	sp|Q0VCK0|PUR9_BOVIN	Bifunctional purine biosynthesis protein PURH OS=Bos taurus GN=ATIC PE=2 SV=1
	sp|Q0VCI6|PIHD1_BOVIN	PIH1 domain-containing protein 1 OS=Bos taurus GN=PIH1D1 PE=2 SV=1
	sp|Q0VCC0|CAYP1_BOVIN	Calcyphosin OS=Bos taurus GN=CAPS PE=2 SV=1
	sp|Q0VC68|SEPT5_BOVIN	Septin-5 OS=Bos taurus GN=SEPT5 PE=2 SV=1
	sp|Q0VC65|ETV6_BOVIN	Transcription factor ETV6 OS=Bos taurus GN=ETV6 PE=2 SV=1
	sp|Q0VBZ9|MRP_BOVIN	MARCKS-related protein OS=Bos taurus GN=MARCKSL1 PE=2 SV=1
	sp|Q0V8S0|HGS_BOVIN	Hepatocyte growth factor-regulated tyrosine kinase substrate OS=Bos taurus GN=HGS PE=2 SV=1
	sp|Q0V8J4|VWA7_BOVIN	von Willebrand factor A domain-containing protein 7 OS=Bos taurus GN=VWA7 PE=2 SV=1
	sp|Q0P5K3|UBE2N_BOVIN	Ubiquitin-conjugating enzyme E2 N OS=Bos taurus GN=UBE2N PE=2 SV=1
	sp|Q0P5F7|PI42C_BOVIN	Phosphatidylinositol 5-phosphate 4-kinase type-2 gamma OS=Bos taurus GN=PIP4K2C PE=2 SV=1
	sp|Q0P5F2|PSMG1_BOVIN	Proteasome assembly chaperone 1 OS=Bos taurus GN=PSMG1 PE=2 SV=1
	sp|Q0P5A6|PSMD5_BOVIN	26S proteasome non-ATPase regulatory subunit 5 OS=Bos taurus GN=PSMD5 PE=2 SV=1
	sp|Q0P569|NUCB1_BOVIN	Nucleobindin-1 OS=Bos taurus GN=NUCB1 PE=2 SV=1
	sp|Q0P565|HDDC2_BOVIN	HD domain-containing protein 2 OS=Bos taurus GN=HDDC2 PE=2 SV=1
	sp|Q0P564|CRBN_BOVIN	Protein cereblon OS=Bos taurus GN=CRBN PE=2 SV=1
	sp|Q0IIM3|HS105_BOVIN	Heat shock protein 105 kDa OS=Bos taurus GN=HSPH1 PE=2 SV=1
	sp|Q0IIM2|ARL6_BOVIN	ADP-ribosylation factor-like protein 6 OS=Bos taurus GN=ARL6 PE=1 SV=1
	sp|Q0IIK5|DDX1_BOVIN	ATP-dependent RNA helicase DDX1 OS=Bos taurus GN=DDX1 PE=2 SV=1
	sp|Q0IIJ2|H10_BOVIN	Histone H1.0 OS=Bos taurus GN=H1F0 PE=2 SV=3
	sp|Q0III3|DC1I2_BOVIN	Cytoplasmic dynein 1 intermediate chain 2 OS=Bos taurus GN=DYNC1I2 PE=1 SV=1
	sp|Q0IIF7|UBP14_BOVIN	Ubiquitin carboxyl-terminal hydrolase 14 OS=Bos taurus GN=USP14 PE=2 SV=3
	sp|Q0II59|PDXK_BOVIN	Pyridoxal kinase OS=Bos taurus GN=PDXK PE=2 SV=1
	sp|Q0II26|AIMP2_BOVIN	Aminoacyl tRNA synthase complex-interacting multifunctional protein 2 OS=Bos taurus GN=AIMP2 PE=2 SV=1
	sp|Q09430|PROF2_BOVIN	Profilin-2 OS=Bos taurus GN=PFN2 PE=1 SV=2
	sp|Q08E20|ESTD_BOVIN	S-formylglutathione hydrolase OS=Bos taurus GN=ESD PE=2 SV=1
	sp|Q08DW2|KPRA_BOVIN	Phosphoribosyl pyrophosphate synthase-associated protein 1 OS=Bos taurus GN=PRPSAP1 PE=2 SV=1
	sp|Q08DP0|PGM1_BOVIN	Phosphoglucomutase-1 OS=Bos taurus GN=PGM1 PE=2 SV=1
	sp|Q08DD1|ARSA_BOVIN	Arylsulfatase A OS=Bos taurus GN=ARSA PE=2 SV=1
	sp|Q07130|UGPA_BOVIN	UTP--glucose-1-phosphate uridylyltransferase OS=Bos taurus GN=UGP2 PE=1 SV=2
	sp|Q05B89|GTPC1_BOVIN	Putative GTP cyclohydrolase 1 type 2 NIF3L1 OS=Bos taurus GN=NIF3L1 PE=2 SV=1
	sp|Q05B60|NUD14_BOVIN	Uridine diphosphate glucose pyrophosphatase OS=Bos taurus GN=NUDT14 PE=2 SV=1
	sp|Q05927|5NTD_BOVIN	5'-nucleotidase OS=Bos taurus GN=NT5E PE=1 SV=2
	sp|Q05717|IBP5_BOVIN	Insulin-like growth factor-binding protein 5 OS=Bos taurus GN=IGFBP5 PE=2 SV=2
	sp|Q05443|LUM_BOVIN	Lumican OS=Bos taurus GN=LUM PE=1 SV=1
	sp|Q03247|APOE_BOVIN	Apolipoprotein E OS=Bos taurus GN=APOE PE=2 SV=1
	sp|P84080|ARF1_BOVIN	ADP-ribosylation factor 1 OS=Bos taurus GN=ARF1 PE=1 SV=2
	sp|P83939|SCRN1_BOVIN	Secernin-1 OS=Bos taurus GN=SCRN1 PE=1 SV=2
	sp|P81948|TBA4A_BOVIN	Tubulin alpha-4A chain OS=Bos taurus GN=TUBA4A PE=1 SV=2
	sp|P81644|APOA2_BOVIN	Apolipoprotein A-II OS=Bos taurus GN=APOA2 PE=1 SV=2
	sp|P81287|ANXA5_BOVIN	Annexin A5 OS=Bos taurus GN=ANXA5 PE=1 SV=3
	sp|P81282|CSPG2_BOVIN	Versican core protein OS=Bos taurus GN=VCAN PE=1 SV=2
	sp|P81265|PIGR_BOVIN	Polymeric immunoglobulin receptor OS=Bos taurus GN=PIGR PE=2 SV=1
	sp|P81187|CFAB_BOVIN	Complement factor B OS=Bos taurus GN=CFB PE=1 SV=2
	sp|P80724|BASP1_BOVIN	Brain acid soluble protein 1 OS=Bos taurus GN=BASP1 PE=1 SV=3
	sp|P80513|MANF_BOVIN	Mesencephalic astrocyte-derived neurotrophic factor OS=Bos taurus GN=MANF PE=1 SV=2
	sp|P80311|PPIB_BOVIN	Peptidyl-prolyl cis-trans isomerase B OS=Bos taurus GN=PPIB PE=1 SV=4
	sp|P80227|ACPH_BOVIN	Acylamino-acid-releasing enzyme OS=Bos taurus GN=APEH PE=1 SV=2
	sp|P80177|MIF_BOVIN	Macrophage migration inhibitory factor OS=Bos taurus GN=MIF PE=1 SV=6
	sp|P79345|NPC2_BOVIN	Epididymal secretory protein E1 OS=Bos taurus GN=NPC2 PE=1 SV=1
	sp|P79334|PYGM_BOVIN	Glycogen phosphorylase, muscle form OS=Bos taurus GN=PYGM PE=1 SV=3
	sp|P79136|CAPZB_BOVIN	F-actin-capping protein subunit beta OS=Bos taurus GN=CAPZB PE=1 SV=1
	sp|P79135|MX1_BOVIN	Interferon-induced GTP-binding protein Mx1 OS=Bos taurus GN=MX1 PE=2 SV=4
	sp|P79103|RS4_BOVIN	40S ribosomal protein S4 OS=Bos taurus GN=RPS4 PE=2 SV=3
	sp|P79098|AMPN_BOVIN	Aminopeptidase N OS=Bos taurus GN=ANPEP PE=2 SV=4
	sp|P68509|1433F_BOVIN	14-3-3 protein eta OS=Bos taurus GN=YWHAH PE=1 SV=2
	sp|P68401|PA1B2_BOVIN	Platelet-activating factor acetylhydrolase IB subunit beta OS=Bos taurus GN=PAFAH1B2 PE=1 SV=1
	sp|P68399|CSK21_BOVIN	Casein kinase II subunit alpha OS=Bos taurus GN=CSNK2A1 PE=1 SV=1
	sp|P68250|1433B_BOVIN	14-3-3 protein beta/alpha OS=Bos taurus GN=YWHAB PE=1 SV=2
	sp|P68103|EF1A1_BOVIN	Elongation factor 1-alpha 1 OS=Bos taurus GN=EEF1A1 PE=2 SV=1
	sp|P68102|IF2A_BOVIN	Eukaryotic translation initiation factor 2 subunit 1 OS=Bos taurus GN=EIF2S1 PE=2 SV=2
	sp|P67868|CSK2B_BOVIN	Casein kinase II subunit beta OS=Bos taurus GN=CSNK2B PE=1 SV=1
	sp|P67808|YBOX1_BOVIN	Nuclease-sensitive element-binding protein 1 OS=Bos taurus GN=YBX1 PE=2 SV=3
	sp|P67774|PP2AA_BOVIN	Serine/threonine-protein phosphatase 2A catalytic subunit alpha isoform OS=Bos taurus GN=PPP2CA PE=1 SV=1
	sp|P63279|UBC9_HUMAN	SUMO-conjugating enzyme UBC9 OS=Homo sapiens GN=UBE2I PE=1 SV=1
	sp|P63258|ACTG_BOVIN	Actin, cytoplasmic 2 OS=Bos taurus GN=ACTG1 PE=1 SV=1
	sp|P63243|GBLP_BOVIN	Guanine nucleotide-binding protein subunit beta-2-like 1 OS=Bos taurus GN=GNB2L1 PE=2 SV=3
	sp|P63103|1433Z_BOVIN	14-3-3 protein zeta/delta OS=Bos taurus GN=YWHAZ PE=1 SV=1
	sp|P63048|RL40_BOVIN	Ubiquitin-60S ribosomal protein L40 OS=Bos taurus GN=UBA52 PE=1 SV=2
	sp|P63009|AP2B1_BOVIN	AP-2 complex subunit beta OS=Bos taurus GN=AP2B1 PE=1 SV=2
	sp|P62998|RAC1_BOVIN	Ras-related C3 botulinum toxin substrate 1 OS=Bos taurus GN=RAC1 PE=1 SV=1
	sp|P62979|RS27A_HUMAN	Ubiquitin-40S ribosomal protein S27a OS=Homo sapiens GN=RPS27A PE=1 SV=2
	sp|P62964|RABP1_BOVIN	Cellular retinoic acid-binding protein 1 OS=Bos taurus GN=CRABP1 PE=1 SV=2
	sp|P62958|HINT1_BOVIN	Histidine triad nucleotide-binding protein 1 OS=Bos taurus GN=HINT1 PE=1 SV=2
	sp|P62935|PPIA_BOVIN	Peptidyl-prolyl cis-trans isomerase A OS=Bos taurus GN=PPIA PE=1 SV=2
	sp|P62871|GBB1_BOVIN	Guanine nucleotide-binding protein G(I)/G(S)/G(T) subunit beta-1 OS=Bos taurus GN=GNB1 PE=1 SV=3
	sp|P62866|RS30_BOVIN	40S ribosomal protein S30 OS=Bos taurus GN=FAU PE=3 SV=1
	sp|P62833|RAP1A_BOVIN	Ras-related protein Rap-1A OS=Bos taurus GN=RAP1A PE=1 SV=1
	sp|P62326|TYB4_BOVIN	Thymosin beta-4 OS=Bos taurus GN=TMSB4 PE=1 SV=2
	sp|P62285|ASPM_BOVIN	Abnormal spindle-like microcephaly-associated protein homolog (Fragment) OS=Bos taurus GN=ASPM PE=2 SV=1
	sp|P62276|RS29_BOVIN	40S ribosomal protein S29 OS=Bos taurus GN=RPS29 PE=3 SV=2
	sp|P62261|1433E_BOVIN	14-3-3 protein epsilon OS=Bos taurus GN=YWHAE PE=2 SV=1
	sp|P62194|PRS8_BOVIN	26S protease regulatory subunit 8 OS=Bos taurus GN=PSMC5 PE=2 SV=1
	sp|P62157|CALM_BOVIN	Calmodulin OS=Bos taurus GN=CALM PE=1 SV=2
	sp|P61955|SUMO2_BOVIN	Small ubiquitin-related modifier 2 OS=Bos taurus GN=SUMO2 PE=3 SV=1
	sp|P61763|STXB1_BOVIN	Syntaxin-binding protein 1 OS=Bos taurus GN=STXBP1 PE=1 SV=1
	sp|P61635|STAT3_BOVIN	Signal transducer and activator of transcription 3 OS=Bos taurus GN=STAT3 PE=2 SV=1
	sp|P61585|RHOA_BOVIN	Transforming protein RhoA OS=Bos taurus GN=RHOA PE=1 SV=1
	sp|P61356|RL27_BOVIN	60S ribosomal protein L27 OS=Bos taurus GN=RPL27 PE=2 SV=2
	sp|P61286|PABP1_BOVIN	Polyadenylate-binding protein 1 OS=Bos taurus GN=PABPC1 PE=2 SV=1
	sp|P61285|DYL1_BOVIN	Dynein light chain 1, cytoplasmic OS=Bos taurus GN=DYNLL1 PE=1 SV=1
	sp|P61283|BAF_BOVIN	Barrier-to-autointegration factor OS=Bos taurus GN=BANF1 PE=3 SV=1
	sp|P61282|NEDD8_BOVIN	NEDD8 OS=Bos taurus GN=NEDD8 PE=3 SV=1
	sp|P61257|RL26_BOVIN	60S ribosomal protein L26 OS=Bos taurus GN=RPL26 PE=2 SV=1
	sp|P61223|RAP1B_BOVIN	Ras-related protein Rap-1b OS=Bos taurus GN=RAP1B PE=2 SV=1
	sp|P61157|ARP3_BOVIN	Actin-related protein 3 OS=Bos taurus GN=ACTR3 PE=1 SV=3
	sp|P61085|UBE2K_BOVIN	Ubiquitin-conjugating enzyme E2 K OS=Bos taurus GN=UBE2K PE=1 SV=3
	sp|P60984|GMFB_BOVIN	Glia maturation factor beta OS=Bos taurus GN=GMFB PE=1 SV=2
	sp|P60902|S10AA_BOVIN	Protein S100-A10 OS=Bos taurus GN=S100A10 PE=1 SV=2
	sp|P60712|ACTB_BOVIN	Actin, cytoplasmic 1 OS=Bos taurus GN=ACTB PE=1 SV=1
	sp|P60661|MYL6_BOVIN	Myosin light polypeptide 6 OS=Bos taurus GN=MYL6 PE=2 SV=2
	sp|P56965|DDAH1_BOVIN	N(G),N(G)-dimethylarginine dimethylaminohydrolase 1 OS=Bos taurus GN=DDAH1 PE=1 SV=3
	sp|P56701|PSMD2_BOVIN	26S proteasome non-ATPase regulatory subunit 2 OS=Bos taurus GN=PSMD2 PE=1 SV=2
	sp|P56658|ADA_BOVIN	Adenosine deaminase OS=Bos taurus GN=ADA PE=1 SV=3
	sp|P55942|MT1H_BOVIN	Metallothionein-I, hippocampal OS=Bos taurus PE=1 SV=1
	sp|P55918|MFAP4_BOVIN	Microfibril-associated glycoprotein 4 OS=Bos taurus GN=MFAP4 PE=1 SV=2
	sp|P55859|PNPH_BOVIN	Purine nucleoside phosphorylase OS=Bos taurus GN=PNP PE=1 SV=3
	sp|P55052|FABP5_BOVIN	Fatty acid-binding protein, epidermal OS=Bos taurus GN=FABP5 PE=1 SV=4
	sp|P54149|MSRA_BOVIN	Mitochondrial peptide methionine sulfoxide reductase OS=Bos taurus GN=MSRA PE=1 SV=2
	sp|P53620|COPG1_BOVIN	Coatomer subunit gamma-1 OS=Bos taurus GN=COPG1 PE=1 SV=1
	sp|P53619|COPD_BOVIN	Coatomer subunit delta OS=Bos taurus GN=ARCN1 PE=1 SV=1
	sp|P52556|BLVRB_BOVIN	Flavin reductase (NADPH) OS=Bos taurus GN=BLVRB PE=1 SV=2
	sp|P52193|CALR_BOVIN	Calreticulin OS=Bos taurus GN=CALR PE=1 SV=2
	sp|P52175|NDKA2_BOVIN	Nucleoside diphosphate kinase A 2 OS=Bos taurus GN=NME1-2 PE=1 SV=3
	sp|P51176|TGM2_BOVIN	Protein-glutamine gamma-glutamyltransferase 2 OS=Bos taurus GN=TGM2 PE=1 SV=1
	sp|P51122|AN32A_BOVIN	Acidic leucine-rich nuclear phosphoprotein 32 family member A OS=Bos taurus GN=ANP32A PE=1 SV=2
	sp|P50397|GDIB_BOVIN	Rab GDP dissociation inhibitor beta OS=Bos taurus GN=GDI2 PE=2 SV=3
	sp|P50227|ST1A1_BOVIN	Sulfotransferase 1A1 OS=Bos taurus GN=SULT1A1 PE=1 SV=2
	sp|P49951|CLH1_BOVIN	Clathrin heavy chain 1 OS=Bos taurus GN=CLTC PE=1 SV=1
	sp|P49907|SEPP1_BOVIN	Selenoprotein P OS=Bos taurus GN=SEPP1 PE=2 SV=2
	sp|P48644|AL1A1_BOVIN	Retinal dehydrogenase 1 OS=Bos taurus GN=ALDH1A1 PE=2 SV=3
	sp|P48427|TBCA_BOVIN	Tubulin-specific chaperone A OS=Bos taurus GN=TBCA PE=1 SV=3
	sp|P48034|AOXA_BOVIN	Aldehyde oxidase 1 OS=Bos taurus GN=AOX1 PE=1 SV=2
	sp|P46196|MK01_BOVIN	Mitogen-activated protein kinase 1 OS=Bos taurus GN=MAPK1 PE=2 SV=3
	sp|P46195|KGUA_BOVIN	Guanylate kinase OS=Bos taurus GN=GUK1 PE=1 SV=2
	sp|P46193|ANXA1_BOVIN	Annexin A1 OS=Bos taurus GN=ANXA1 PE=2 SV=2
	sp|P42899|RLA2_BOVIN	60S acidic ribosomal protein P2 OS=Bos taurus GN=RPLP2 PE=3 SV=1
	sp|P41541|USO1_BOVIN	General vesicular transport factor p115 OS=Bos taurus GN=USO1 PE=1 SV=1
	sp|P41500|ACYP1_BOVIN	Acylphosphatase-1 OS=Bos taurus GN=ACYP1 PE=1 SV=2
	sp|P41361|ANT3_BOVIN	Antithrombin-III OS=Bos taurus GN=SERPINC1 PE=1 SV=2
	sp|P40682|VAS1_BOVIN	V-type proton ATPase subunit S1 OS=Bos taurus GN=ATP6AP1 PE=1 SV=1
	sp|P40673|HMGB2_BOVIN	High mobility group protein B2 OS=Bos taurus GN=HMGB2 PE=1 SV=3
	sp|P39872|RL3_BOVIN	60S ribosomal protein L3 OS=Bos taurus GN=RPL3 PE=2 SV=2
	sp|P37980|IPYR_BOVIN	Inorganic pyrophosphatase OS=Bos taurus GN=PPA1 PE=1 SV=2
	sp|P37359|MT3_BOVIN	Metallothionein-3 OS=Bos taurus GN=MT3 PE=1 SV=2
	sp|P35908|K22E_HUMAN	Keratin, type II cytoskeletal 2 epidermal OS=Homo sapiens GN=KRT2 PE=1 SV=2
	sp|P35705|PRDX3_BOVIN	Thioredoxin-dependent peroxide reductase, mitochondrial OS=Bos taurus GN=PRDX3 PE=1 SV=2
	sp|P35605|COPB2_BOVIN	Coatomer subunit beta' OS=Bos taurus GN=COPB2 PE=1 SV=3
	sp|P35604|COPZ1_BOVIN	Coatomer subunit zeta-1 OS=Bos taurus GN=COPZ1 PE=1 SV=2
	sp|P35527|K1C9_HUMAN	Keratin, type I cytoskeletal 9 OS=Homo sapiens GN=KRT9 PE=1 SV=3
	sp|P35466|S10A4_BOVIN	Protein S100-A4 OS=Bos taurus GN=S100A4 PE=1 SV=2
	sp|P34955|A1AT_BOVIN	Alpha-1-antiproteinase OS=Bos taurus GN=SERPINA1 PE=1 SV=1
	sp|P34933|HSP72_BOVIN	Heat shock-related 70 kDa protein 2 OS=Bos taurus GN=HSPA2 PE=2 SV=2
	sp|P33672|PSB3_BOVIN	Proteasome subunit beta type-3 OS=Bos taurus GN=PSMB3 PE=1 SV=3
	sp|P33433|HRG_BOVIN	Histidine-rich glycoprotein (Fragments) OS=Bos taurus GN=HRG PE=1 SV=1
	sp|P33097|AATC_BOVIN	Aspartate aminotransferase, cytoplasmic OS=Bos taurus GN=GOT1 PE=1 SV=3
	sp|P31976|EZRI_BOVIN	Ezrin OS=Bos taurus GN=EZR PE=1 SV=2
	sp|P31754|UMPS_BOVIN	Uridine 5'-monophosphate synthase OS=Bos taurus GN=UMPS PE=2 SV=1
	sp|P31717|NMT1_BOVIN	Glycylpeptide N-tetradecanoyltransferase 1 OS=Bos taurus GN=NMT1 PE=1 SV=2
	sp|P31408|VATB2_BOVIN	V-type proton ATPase subunit B, brain isoform OS=Bos taurus GN=ATP6V1B2 PE=1 SV=3
	sp|P31404|VATA_BOVIN	V-type proton ATPase catalytic subunit A OS=Bos taurus GN=ATP6V1A PE=2 SV=2
	sp|P31322|KAP3_BOVIN	cAMP-dependent protein kinase type II-beta regulatory subunit OS=Bos taurus GN=PRKAR2B PE=2 SV=2
	sp|P30932|CD9_BOVIN	CD9 antigen OS=Bos taurus GN=CD9 PE=2 SV=2
	sp|P29702|FNTA_BOVIN	Protein farnesyltransferase/geranylgeranyltransferase type-1 subunit alpha OS=Bos taurus GN=FNTA PE=2 SV=2
	sp|P28801|GSTP1_BOVIN	Glutathione S-transferase P OS=Bos taurus GN=GSTP1 PE=1 SV=2
	sp|P28800|A2AP_BOVIN	Alpha-2-antiplasmin OS=Bos taurus GN=SERPINF2 PE=1 SV=2
	sp|P26884|FKBP3_BOVIN	Peptidyl-prolyl cis-trans isomerase FKBP3 OS=Bos taurus GN=FKBP3 PE=1 SV=2
	sp|P26882|PPID_BOVIN	Peptidyl-prolyl cis-trans isomerase D OS=Bos taurus GN=PPID PE=1 SV=6
	sp|P26779|SAP_BOVIN	Prosaposin OS=Bos taurus GN=PSAP PE=1 SV=3
	sp|P26452|RSSA_BOVIN	40S ribosomal protein SA OS=Bos taurus GN=RPSA PE=2 SV=4
	sp|P25975|CATL1_BOVIN	Cathepsin L1 OS=Bos taurus GN=CTSL PE=1 SV=3
	sp|P25417|CYTB_BOVIN	Cystatin-B OS=Bos taurus GN=CSTB PE=1 SV=1
	sp|P24627|TRFL_BOVIN	Lactotransferrin OS=Bos taurus GN=LTF PE=1 SV=2
	sp|P23805|CONG_BOVIN	Conglutinin OS=Bos taurus GN=CGN1 PE=1 SV=2
	sp|P23727|P85A_BOVIN	Phosphatidylinositol 3-kinase regulatory subunit alpha OS=Bos taurus GN=PIK3R1 PE=1 SV=1
	sp|P23196|APEX1_BOVIN	DNA-(apurinic or apyrimidinic site) lyase OS=Bos taurus GN=APEX1 PE=1 SV=2
	sp|P22226|CTHL1_BOVIN	Cathelicidin-1 OS=Bos taurus GN=CATHL1 PE=1 SV=2
	sp|P21856|GDIA_BOVIN	Rab GDP dissociation inhibitor alpha OS=Bos taurus GN=GDI1 PE=1 SV=1
	sp|P21782|PTN_BOVIN	Pleiotrophin OS=Bos taurus GN=PTN PE=1 SV=2
	sp|P21752|TYB10_BOVIN	Thymosin beta-10 OS=Bos taurus GN=TMSB10 PE=1 SV=2
	sp|P20811|ICAL_BOVIN	Calpastatin OS=Bos taurus GN=CAST PE=1 SV=2
	sp|P20456|IMPA1_BOVIN	Inositol monophosphatase 1 OS=Bos taurus GN=IMPA1 PE=1 SV=1
	sp|P20414|TIMP1_BOVIN	Metalloproteinase inhibitor 1 OS=Bos taurus GN=TIMP1 PE=1 SV=1
	sp|P20072|ANXA7_BOVIN	Annexin A7 OS=Bos taurus GN=ANXA7 PE=1 SV=2
	sp|P19858|LDHA_BOVIN	L-lactate dehydrogenase A chain OS=Bos taurus GN=LDHA PE=2 SV=2
	sp|P19803|GDIR1_BOVIN	Rho GDP-dissociation inhibitor 1 OS=Bos taurus GN=ARHGDIA PE=1 SV=3
	sp|P19120|HSP7C_BOVIN	Heat shock cognate 71 kDa protein OS=Bos taurus GN=HSPA8 PE=1 SV=2
	sp|P19035|APOC3_BOVIN	Apolipoprotein C-III OS=Bos taurus GN=APOC3 PE=1 SV=2
	sp|P18203|FKB1A_BOVIN	Peptidyl-prolyl cis-trans isomerase FKBP1A OS=Bos taurus GN=FKBP1A PE=1 SV=2
	sp|P18130|ADA1A_BOVIN	Alpha-1A adrenergic receptor OS=Bos taurus GN=ADRA1A PE=2 SV=1
	sp|P17697|CLUS_BOVIN	Clusterin OS=Bos taurus GN=CLU PE=1 SV=1
	sp|P17690|APOH_BOVIN	Beta-2-glycoprotein 1 OS=Bos taurus GN=APOH PE=1 SV=4
	sp|P17248|SYWC_BOVIN	Tryptophan--tRNA ligase, cytoplasmic OS=Bos taurus GN=WARS PE=1 SV=3
	sp|P15497|APOA1_BOVIN	Apolipoprotein A-I OS=Bos taurus GN=APOA1 PE=1 SV=3
	sp|P15396|ENPP3_BOVIN	Ectonucleotide pyrophosphatase/phosphodiesterase family member 3 OS=Bos taurus GN=ENPP3 PE=1 SV=2
	sp|P15246|PIMT_BOVIN	Protein-L-isoaspartate(D-aspartate) O-methyltransferase OS=Bos taurus GN=PCMT1 PE=1 SV=2
	sp|P15103|GLNA_BOVIN	Glutamine synthetase OS=Bos taurus GN=GLUL PE=2 SV=4
	sp|P13753|HA1B_BOVIN	BOLA class I histocompatibility antigen, alpha chain BL3-7 OS=Bos taurus PE=2 SV=1
	sp|P13696|PEBP1_BOVIN	Phosphatidylethanolamine-binding protein 1 OS=Bos taurus GN=PEBP1 PE=1 SV=2
	sp|P13645|K1C10_HUMAN	Keratin, type I cytoskeletal 10 OS=Homo sapiens GN=KRT10 PE=1 SV=6
	sp|P13384|IBP2_BOVIN	Insulin-like growth factor-binding protein 2 OS=Bos taurus GN=IGFBP2 PE=1 SV=2
	sp|P13214|ANXA4_BOVIN	Annexin A4 OS=Bos taurus GN=ANXA4 PE=1 SV=2
	sp|P13213|SPRC_BOVIN	SPARC OS=Bos taurus GN=SPARC PE=1 SV=2
	sp|P13135|CPNS1_BOVIN	Calpain small subunit 1 OS=Bos taurus GN=CAPNS1 PE=2 SV=1
	sp|P12820|ACE_BOVIN	Angiotensin-converting enzyme (Fragment) OS=Bos taurus GN=ACE PE=1 SV=2
	sp|P12763|FETUA_BOVIN	Alpha-2-HS-glycoprotein OS=Bos taurus GN=AHSG PE=1 SV=2
	sp|P12378|UGDH_BOVIN	UDP-glucose 6-dehydrogenase OS=Bos taurus GN=UGDH PE=1 SV=2
	sp|P11834|OPCM_BOVIN	Opioid-binding protein/cell adhesion molecule OS=Bos taurus GN=OPCML PE=1 SV=1
	sp|P11151|LIPL_BOVIN	Lipoprotein lipase OS=Bos taurus GN=LPL PE=1 SV=2
	sp|P11116|LEG1_BOVIN	Galectin-1 OS=Bos taurus GN=LGALS1 PE=1 SV=2
	sp|P11019|VATE1_BOVIN	V-type proton ATPase subunit E 1 OS=Bos taurus GN=ATP6V1E1 PE=2 SV=1
	sp|P11017|GBB2_BOVIN	Guanine nucleotide-binding protein G(I)/G(S)/G(T) subunit beta-2 OS=Bos taurus GN=GNB2 PE=2 SV=3
	sp|P10462|S10A2_BOVIN	Protein S100-A2 OS=Bos taurus GN=S100A2 PE=1 SV=1
	sp|P10103|HMGB1_BOVIN	High mobility group protein B1 OS=Bos taurus GN=HMGB1 PE=1 SV=3
	sp|P10096|G3P_BOVIN	Glyceraldehyde-3-phosphate dehydrogenase OS=Bos taurus GN=GAPDH PE=1 SV=4
	sp|P0CB32|HS71L_BOVIN	Heat shock 70 kDa protein 1-like OS=Bos taurus GN=HSPA1L PE=3 SV=1
	sp|P0C1G6|SWP70_BOVIN	Switch-associated protein 70 OS=Bos taurus GN=SWAP70 PE=1 SV=1
	sp|P09867|ROA1_BOVIN	Heterogeneous nuclear ribonucleoprotein A1 OS=Bos taurus GN=HNRNPA1 PE=1 SV=2
	sp|P09487|PPBT_BOVIN	Alkaline phosphatase, tissue-nonspecific isozyme OS=Bos taurus GN=ALPL PE=1 SV=2
	sp|P08728|K1C19_BOVIN	Keratin, type I cytoskeletal 19 OS=Bos taurus GN=KRT19 PE=2 SV=1
	sp|P08037|B4GT1_BOVIN	Beta-1,4-galactosyltransferase 1 OS=Bos taurus GN=B4GALT1 PE=1 SV=3
	sp|P07688|CATB_BOVIN	Cathepsin B OS=Bos taurus GN=CTSB PE=1 SV=5
	sp|P07589|FINC_BOVIN	Fibronectin OS=Bos taurus GN=FN1 PE=1 SV=4
	sp|P07107|ACBP_BOVIN	Acyl-CoA-binding protein OS=Bos taurus GN=DBI PE=1 SV=2
	sp|P06868|PLMN_BOVIN	Plasminogen OS=Bos taurus GN=PLG PE=1 SV=2
	sp|P06623|CN37_BOVIN	2',3'-cyclic-nucleotide 3'-phosphodiesterase OS=Bos taurus GN=CNP PE=2 SV=2
	sp|P05786|K2C8_BOVIN	Keratin, type II cytoskeletal 8 OS=Bos taurus GN=KRT8 PE=2 SV=3
	sp|P04973|CLCA_BOVIN	Clathrin light chain A OS=Bos taurus GN=CLTA PE=1 SV=1
	sp|P04896|GNAS2_BOVIN	Guanine nucleotide-binding protein G(s) subunit alpha isoforms short OS=Bos taurus GN=GNAS PE=1 SV=1
	sp|P04745|AMY1_HUMAN	Alpha-amylase 1 OS=Homo sapiens GN=AMY1A PE=1 SV=2
	sp|P04272|ANXA2_BOVIN	Annexin A2 OS=Bos taurus GN=ANXA2 PE=1 SV=2
	sp|P04264|K2C1_HUMAN	Keratin, type II cytoskeletal 1 OS=Homo sapiens GN=KRT1 PE=1 SV=6
	sp|P02769|ALBU_BOVIN	Serum albumin OS=Bos taurus GN=ALB PE=1 SV=4
	sp|P02768|ALBU_HUMAN	Serum albumin OS=Homo sapiens GN=ALB PE=1 SV=2
	sp|P02702|FOLR1_BOVIN	Folate receptor alpha OS=Bos taurus GN=FOLR1 PE=1 SV=3
	sp|P02676|FIBB_BOVIN	Fibrinogen beta chain OS=Bos taurus GN=FGB PE=1 SV=2
	sp|P02639|S10A1_BOVIN	Protein S100-A1 OS=Bos taurus GN=S100A1 PE=1 SV=2
	sp|P02638|S100B_BOVIN	Protein S100-B OS=Bos taurus GN=S100B PE=1 SV=2
	sp|P02584|PROF1_BOVIN	Profilin-1 OS=Bos taurus GN=PFN1 PE=1 SV=2
	sp|P02510|CRYAB_BOVIN	Alpha-crystallin B chain OS=Bos taurus GN=CRYAB PE=1 SV=2
	sp|P02316|HMGN1_BOVIN	Non-histone chromosomal protein HMG-14 OS=Bos taurus GN=HMGN1 PE=1 SV=2
	sp|P02313|HMGN2_BOVIN	Non-histone chromosomal protein HMG-17 OS=Bos taurus GN=HMGN2 PE=1 SV=2
	sp|P02081|HBBF_BOVIN	Hemoglobin fetal subunit beta OS=Bos taurus PE=1 SV=1
	sp|P02070|HBB_BOVIN	Hemoglobin subunit beta OS=Bos taurus GN=HBB PE=1 SV=1
	sp|P01966|HBA_BOVIN	Hemoglobin subunit alpha OS=Bos taurus GN=HBA PE=1 SV=2
	sp|P01888|B2MG_BOVIN	Beta-2-microglobulin OS=Bos taurus GN=B2M PE=1 SV=2
	sp|P01252|PTMA_BOVIN	Prothymosin alpha OS=Bos taurus GN=PTMA PE=1 SV=2
	sp|P01112|RASH_HUMAN	GTPase HRas OS=Homo sapiens GN=HRAS PE=1 SV=1
	sp|P01045|KNG2_BOVIN	Kininogen-2 OS=Bos taurus GN=KNG2 PE=1 SV=1
	sp|P01035|CYTC_BOVIN	Cystatin-C OS=Bos taurus GN=CST3 PE=1 SV=2
	sp|P01008|ANT3_HUMAN	Antithrombin-III OS=Homo sapiens GN=SERPINC1 PE=1 SV=1
	sp|P00974|BPT1_BOVIN	Pancreatic trypsin inhibitor OS=Bos taurus PE=1 SV=2
	sp|P00921|CAH2_BOVIN	Carbonic anhydrase 2 OS=Bos taurus GN=CA2 PE=1 SV=3
	sp|P00761|TRYP_PIG	Trypsin OS=Sus scrofa PE=1 SV=1
	sp|P00745|PROC_BOVIN	Vitamin K-dependent protein C (Fragment) OS=Bos taurus GN=PROC PE=1 SV=1
	sp|P00744|PROZ_BOVIN	Vitamin K-dependent protein Z OS=Bos taurus GN=PROZ PE=1 SV=1
	sp|P00741|FA9_BOVIN	Coagulation factor IX (Fragment) OS=Bos taurus GN=F9 PE=1 SV=1
	sp|P00735|THRB_BOVIN	Prothrombin OS=Bos taurus GN=F2 PE=1 SV=2
	sp|P00727|AMPL_BOVIN	Cytosol aminopeptidase OS=Bos taurus GN=LAP3 PE=1 SV=3
	sp|P00570|KAD1_BOVIN	Adenylate kinase isoenzyme 1 OS=Bos taurus GN=AK1 PE=1 SV=2
	sp|P00515|KAP2_BOVIN	cAMP-dependent protein kinase type II-alpha regulatory subunit OS=Bos taurus GN=PRKAR2A PE=1 SV=2
	sp|P00514|KAP0_BOVIN	cAMP-dependent protein kinase type I-alpha regulatory subunit OS=Bos taurus GN=PRKAR1A PE=1 SV=2
	sp|P00442|SODC_BOVIN	Superoxide dismutase [Cu-Zn] OS=Bos taurus GN=SOD1 PE=1 SV=2
	sp|P00435|GPX1_BOVIN	Glutathione peroxidase 1 OS=Bos taurus GN=GPX1 PE=1 SV=3
	sp|P00432|CATA_BOVIN	Catalase OS=Bos taurus GN=CAT PE=1 SV=3
	sp|O97764|QOR_BOVIN	Zeta-crystallin OS=Bos taurus GN=CRYZ PE=2 SV=2
	sp|O97680|THIO_BOVIN	Thioredoxin OS=Bos taurus GN=TXN PE=3 SV=3
	sp|O77834|PRDX6_BOVIN	Peroxiredoxin-6 OS=Bos taurus GN=PRDX6 PE=1 SV=3
	sp|O62830|PPM1B_BOVIN	Protein phosphatase 1B OS=Bos taurus GN=PPM1B PE=2 SV=2
	sp|O62768|TRXR1_BOVIN	Thioredoxin reductase 1, cytoplasmic OS=Bos taurus GN=TXNRD1 PE=2 SV=3
	sp|O46563|VATH_BOVIN	V-type proton ATPase subunit H OS=Bos taurus GN=ATP6V1H PE=2 SV=2
	sp|O46375|TTHY_BOVIN	Transthyretin OS=Bos taurus GN=TTR PE=1 SV=1
	sp|O18883|TXND9_BOVIN	Thioredoxin domain-containing protein 9 OS=Bos taurus GN=TXNDC9 PE=2 SV=2
	sp|O18789|RS2_BOVIN	40S ribosomal protein S2 OS=Bos taurus GN=RPS2 PE=2 SV=2
	sp|O02853|PTGDS_BOVIN	Prostaglandin-H2 D-isomerase OS=Bos taurus GN=PTGDS PE=1 SV=1
	sp|O02659|MBL2_BOVIN	Mannose-binding protein C OS=Bos taurus GN=MBL PE=2 SV=1
	sp|G3X745|GPC1_BOVIN	Glypican-1 OS=Bos taurus GN=GPC1 PE=2 SV=1
	sp|F1N152|HTRA1_BOVIN	Serine protease HTRA1 OS=Bos taurus GN=HTRA1 PE=2 SV=1
	sp|F1MLB4|DAAF3_BOVIN	Dynein assembly factor 3, axonemal OS=Bos taurus GN=DNAAF3 PE=3 SV=2
	sp|F1MCY2|PHAR4_BOVIN	Phosphatase and actin regulator 4 OS=Bos taurus GN=PHACTR4 PE=2 SV=1
	sp|E1BNQ4|NNRD_BOVIN	ATP-dependent (S)-NAD(P)H-hydrate dehydratase OS=Bos taurus GN=CARKD PE=3 SV=1
	sp|E1BLK7|MIEAP_BOVIN	Mitochondria-eating protein OS=Bos taurus GN=SPATA18 PE=3 SV=1
	sp|E1BF81|CBG_BOVIN	Corticosteroid-binding globulin OS=Bos taurus GN=SERPINA6 PE=3 SV=1
	sp|E1BCH6|ISPD_BOVIN	Isoprenoid synthase domain-containing protein OS=Bos taurus GN=ISPD PE=3 SV=2
	sp|A7YY28|ABHEB_BOVIN	Alpha/beta hydrolase domain-containing protein 14B OS=Bos taurus GN=ABHD14B PE=2 SV=1
	sp|A7YW98|SYRC_BOVIN	Arginine--tRNA ligase, cytoplasmic OS=Bos taurus GN=RARS PE=2 SV=1
	sp|A7YW45|ANM5_BOVIN	Protein arginine N-methyltransferase 5 OS=Bos taurus GN=PRMT5 PE=2 SV=1
	sp|A7MBJ5|CAND1_BOVIN	Cullin-associated NEDD8-dissociated protein 1 OS=Bos taurus GN=CAND1 PE=2 SV=1
	sp|A7MBJ4|PTPRF_BOVIN	Receptor-type tyrosine-protein phosphatase F OS=Bos taurus GN=PTPRF PE=2 SV=1
	sp|A7MBG0|PURA2_BOVIN	Adenylosuccinate synthetase isozyme 2 OS=Bos taurus GN=ADSS PE=2 SV=2
	sp|A7MBC2|PDXD1_BOVIN	Pyridoxal-dependent decarboxylase domain-containing protein 1 OS=Bos taurus GN=PDXDC1 PE=2 SV=1
	sp|A7MBC0|NAGA_BOVIN	Putative N-acetylglucosamine-6-phosphate deacetylase OS=Bos taurus GN=AMDHD2 PE=2 SV=1
	sp|A7MB78|GYS1_BOVIN	Glycogen [starch] synthase, muscle OS=Bos taurus GN=GYS1 PE=2 SV=1
	sp|A7MB62|ARP2_BOVIN	Actin-related protein 2 OS=Bos taurus GN=ACTR2 PE=1 SV=1
	sp|A7MB16|EIF3B_BOVIN	Eukaryotic translation initiation factor 3 subunit B OS=Bos taurus GN=EIF3B PE=2 SV=1
	sp|A7MAZ3|UBA5_BOVIN	Ubiquitin-like modifier-activating enzyme 5 OS=Bos taurus GN=UBA5 PE=2 SV=1
	sp|A7E3W2|LG3BP_BOVIN	Galectin-3-binding protein OS=Bos taurus GN=LGALS3BP PE=1 SV=1
	sp|A7E3Q8|PLST_BOVIN	Plastin-3 OS=Bos taurus GN=PLS3 PE=2 SV=1
	sp|A6QR56|A16A1_BOVIN	Aldehyde dehydrogenase family 16 member A1 OS=Bos taurus GN=ALDH16A1 PE=2 SV=1
	sp|A6QR55|UBP4_BOVIN	Ubiquitin carboxyl-terminal hydrolase 4 OS=Bos taurus GN=USP4 PE=2 SV=1
	sp|A6QQM4|ZN474_BOVIN	Zinc finger protein 474 OS=Bos taurus GN=ZNF474 PE=2 SV=1
	sp|A6QQ85|UPK3L_BOVIN	Uroplakin-3b-like protein OS=Bos taurus GN=UPK3BL PE=2 SV=2
	sp|A6QPY0|OST48_BOVIN	Dolichyl-diphosphooligosaccharide--protein glycosyltransferase 48 kDa subunit OS=Bos taurus GN=DDOST PE=2 SV=2
	sp|A6QPQ2|SPA38_BOVIN	Serpin A3-8 OS=Bos taurus GN=SERPINA3-8 PE=2 SV=1
	sp|A6QP05|DHR12_BOVIN	Dehydrogenase/reductase SDR family member 12 OS=Bos taurus GN=DHRS12 PE=2 SV=1
	sp|A6QLU7|F115C_BOVIN	Protein FAM115C OS=Bos taurus GN=FAM115C PE=2 SV=1
	sp|A6QLJ8|PTER_BOVIN	Phosphotriesterase-related protein OS=Bos taurus GN=PTER PE=2 SV=1
	sp|A6QLG5|RS9_BOVIN	40S ribosomal protein S9 OS=Bos taurus GN=RPS9 PE=2 SV=1
	sp|A6H7I5|DYN2_BOVIN	Dynamin-2 OS=Bos taurus GN=DNM2 PE=2 SV=1
	sp|A6H7G2|DBNL_BOVIN	Drebrin-like protein OS=Bos taurus GN=DBNL PE=2 SV=1
	sp|A6H7B5|CSN3_BOVIN	COP9 signalosome complex subunit 3 OS=Bos taurus GN=COPS3 PE=2 SV=1
	sp|A6H769|RS7_BOVIN	40S ribosomal protein S7 OS=Bos taurus GN=RPS7 PE=2 SV=1
	sp|A6H768|GALK1_BOVIN	Galactokinase OS=Bos taurus GN=GALK1 PE=2 SV=2
	sp|A6H767|NP1L1_BOVIN	Nucleosome assembly protein 1-like 1 OS=Bos taurus GN=NAP1L1 PE=2 SV=1
	sp|A6H742|PLSI_BOVIN	Plastin-1 OS=Bos taurus GN=PLS1 PE=2 SV=1
	sp|A5PKL1|OXR1_BOVIN	Oxidation resistance protein 1 OS=Bos taurus GN=OXR1 PE=2 SV=2
	sp|A5PKH3|FAAA_BOVIN	Fumarylacetoacetase OS=Bos taurus GN=FAH PE=2 SV=1
	sp|A5PK65|DOPD_BOVIN	D-dopachrome decarboxylase OS=Bos taurus GN=DDT PE=3 SV=1
	sp|A5PK63|RS17_BOVIN	40S ribosomal protein S17 OS=Bos taurus GN=RPS17 PE=2 SV=1
	sp|A5PK51|PNCB_BOVIN	Nicotinate phosphoribosyltransferase OS=Bos taurus GN=NAPRT1 PE=2 SV=2
	sp|A5PK00|VPS36_BOVIN	Vacuolar protein-sorting-associated protein 36 OS=Bos taurus GN=VPS36 PE=2 SV=1
	sp|A5D989|EF1D_BOVIN	Elongation factor 1-delta OS=Bos taurus GN=EEF1D PE=2 SV=2
	sp|A5D7D1|ACTN4_BOVIN	Alpha-actinin-4 OS=Bos taurus GN=ACTN4 PE=2 SV=1
	sp|A5D7A0|EFHD2_BOVIN	EF-hand domain-containing protein D2 OS=Bos taurus GN=EFHD2 PE=2 SV=1
	sp|A5D785|XPO2_BOVIN	Exportin-2 OS=Bos taurus GN=CSE1L PE=2 SV=1
	sp|A4IFC4|SH3L2_BOVIN	SH3 domain-binding glutamic acid-rich-like protein 2 OS=Bos taurus GN=SH3BGRL2 PE=3 SV=1
	sp|A4IF97|ML12B_BOVIN	Myosin regulatory light chain 12B OS=Bos taurus GN=MYL12B PE=2 SV=1
	sp|A4IF89|EXOC8_BOVIN	Exocyst complex component 8 OS=Bos taurus GN=EXOC8 PE=2 SV=1
	sp|A4IF78|TFIP8_BOVIN	Tumor necrosis factor alpha-induced protein 8 OS=Bos taurus GN=TNFAIP8 PE=2 SV=1
	sp|A4IF69|NHLC2_BOVIN	NHL repeat-containing protein 2 OS=Bos taurus GN=NHLRC2 PE=2 SV=1
	sp|A4FV54|RAB8A_BOVIN	Ras-related protein Rab-8A OS=Bos taurus GN=RAB8A PE=2 SV=1
	sp|A4FUG8|RABE2_BOVIN	Rab GTPase-binding effector protein 2 OS=Bos taurus GN=RABEP2 PE=2 SV=1
	sp|A4FUE7|ZC21A_BOVIN	Zinc finger C2HC domain-containing protein 1A OS=Bos taurus GN=ZC2HC1A PE=2 SV=1
	sp|A4FUD9|MCM3_BOVIN	DNA replication licensing factor MCM3 OS=Bos taurus GN=MCM3 PE=2 SV=1
	sp|A4FUA8|CAZA1_BOVIN	F-actin-capping protein subunit alpha-1 OS=Bos taurus GN=CAPZA1 PE=2 SV=1
	sp|A3KN12|PUR8_BOVIN	Adenylosuccinate lyase OS=Bos taurus GN=ADSL PE=2 SV=1
	sp|A3KMY4|CTL4_BOVIN	Choline transporter-like protein 4 OS=Bos taurus GN=SLC44A4 PE=2 SV=1
	sp|A3KMX8|CF211_BOVIN	UPF0364 protein C6orf211 homolog OS=Bos taurus PE=2 SV=1
	sp|A3KMV5|UBA1_BOVIN	Ubiquitin-like modifier-activating enzyme 1 OS=Bos taurus GN=UBA1 PE=2 SV=1
	sp|A2VE99|SEP11_BOVIN	Septin-11 OS=Bos taurus GN=SEPT11 PE=2 SV=1
	sp|A2VE14|SAE1_BOVIN	SUMO-activating enzyme subunit 1 OS=Bos taurus GN=SAE1 PE=2 SV=1
	sp|A2VDS0|KPRB_BOVIN	Phosphoribosyl pyrophosphate synthase-associated protein 2 OS=Bos taurus GN=PRPSAP2 PE=2 SV=1
	sp|A2VDK6|WASF2_BOVIN	Wiskott-Aldrich syndrome protein family member 2 OS=Bos taurus GN=WASF2 PE=2 SV=1
	sp|A2I7N3|SPA37_BOVIN	Serpin A3-7 OS=Bos taurus GN=SERPINA3-7 PE=3 SV=1
	sp|A1L5A6|ADRM1_BOVIN	Proteasomal ubiquitin receptor ADRM1 OS=Bos taurus GN=ADRM1 PE=2 SV=1
	sp|A1A4R1|H2A2C_BOVIN	Histone H2A type 2-C OS=Bos taurus GN=HIST2H2AC PE=2 SV=1
	sp|A1A4P5|PFD2_BOVIN	Prefoldin subunit 2 OS=Bos taurus GN=PFDN2 PE=2 SV=1
	sp|A1A4K5|ENPP2_BOVIN	Ectonucleotide pyrophosphatase/phosphodiesterase family member 2 OS=Bos taurus GN=ENPP2 PE=1 SV=1
	sp|A1A4K3|DDB1_BOVIN	DNA damage-binding protein 1 OS=Bos taurus GN=DDB1 PE=2 SV=1
	sp|A1A4J1|K6PL_BOVIN	6-phosphofructokinase, liver type OS=Bos taurus GN=PFKL PE=2 SV=1
	sp|A0JN39|COPB_BOVIN	Coatomer subunit beta OS=Bos taurus GN=COPB1 PE=1 SV=1
	REVERSE_tr|Q5BIR8|Q5BIR8_BOVIN-R	Fasciculation and elongation protein zeta 1 (Zygin I) OS=Bos taurus GN=FEZ1 PE=2 SV=1
	REVERSE_tr|Q1JPG7|Q1JPG7_BOVIN-R	Pyruvate kinase OS=Bos taurus GN=PKLR PE=2 SV=1
	REVERSE_tr|G3X8E2|G3X8E2_BOVIN-R	Uncharacterized protein (Fragment) OS=Bos taurus GN=VPS4A PE=2 SV=1
	REVERSE_tr|G3X7E9|G3X7E9_BOVIN-R	Uncharacterized protein OS=Bos taurus GN=IL13RA1 PE=4 SV=1
	REVERSE_tr|G3N3C7|G3N3C7_BOVIN-R	Uncharacterized protein (Fragment) OS=Bos taurus GN=FAM13B PE=4 SV=1
	REVERSE_tr|G3MYZ4|G3MYZ4_BOVIN-R	Uncharacterized protein OS=Bos taurus GN=DCP2 PE=4 SV=1
	REVERSE_tr|G3MYW8|G3MYW8_BOVIN-R	Uncharacterized protein OS=Bos taurus PE=4 SV=1
	REVERSE_tr|G3MX05|G3MX05_BOVIN-R	Uncharacterized protein OS=Bos taurus GN=EID1 PE=4 SV=1
	REVERSE_tr|F1N4J2|F1N4J2_BOVIN-R	Uncharacterized protein (Fragment) OS=Bos taurus GN=SACS PE=4 SV=2
	REVERSE_tr|F1N325|F1N325_BOVIN-R	Uncharacterized protein OS=Bos taurus GN=TTLL10 PE=4 SV=2
	REVERSE_tr|F1N264|F1N264_BOVIN-R	Uncharacterized protein (Fragment) OS=Bos taurus GN=ZEB1 PE=3 SV=2
	REVERSE_tr|F1N1F8|F1N1F8_BOVIN-R	Uncharacterized protein OS=Bos taurus GN=CENPF PE=4 SV=2
	REVERSE_tr|F1N072|F1N072_BOVIN-R	Uncharacterized protein OS=Bos taurus GN=PPP4R4 PE=4 SV=2
	REVERSE_tr|F1MZV6|F1MZV6_BOVIN-R	Uncharacterized protein (Fragment) OS=Bos taurus GN=C2orf54 PE=4 SV=1
	REVERSE_tr|F1MX80|F1MX80_BOVIN-R	Uncharacterized protein OS=Bos taurus GN=METTL3 PE=4 SV=1
	REVERSE_tr|F1MRB9|F1MRB9_BOVIN-R	Uncharacterized protein OS=Bos taurus GN=NOL8 PE=4 SV=2
	REVERSE_tr|F1MMT3|F1MMT3_BOVIN-R	Uncharacterized protein OS=Bos taurus GN=MPDZ PE=4 SV=2
	REVERSE_tr|F1MLG3|F1MLG3_BOVIN-R	Uncharacterized protein (Fragment) OS=Bos taurus GN=TRAPPC8 PE=4 SV=1
	REVERSE_tr|F1ML08|F1ML08_BOVIN-R	Uncharacterized protein OS=Bos taurus GN=CCDC132 PE=4 SV=1
	REVERSE_tr|F1MJR5|F1MJR5_BOVIN-R	Uncharacterized protein OS=Bos taurus GN=PLEKHA3 PE=4 SV=1
	REVERSE_tr|F1MJ58|F1MJ58_BOVIN-R	Uncharacterized protein OS=Bos taurus GN=ECT2 PE=4 SV=2
	REVERSE_tr|F1MHR6|F1MHR6_BOVIN-R	Uncharacterized protein (Fragment) OS=Bos taurus GN=KHSRP PE=4 SV=2
	REVERSE_tr|F1MHG0|F1MHG0_BOVIN-R	Uncharacterized protein (Fragment) OS=Bos taurus GN=MYO7A PE=4 SV=2
	REVERSE_tr|F1MCE7|F1MCE7_BOVIN-R	Uncharacterized protein OS=Bos taurus GN=BMPR1A PE=2 SV=2
	REVERSE_tr|F1MBI8|F1MBI8_BOVIN-R	Uncharacterized protein OS=Bos taurus GN=SYNGAP1 PE=4 SV=2
	REVERSE_tr|E1BLT9|E1BLT9_BOVIN-R	Uncharacterized protein (Fragment) OS=Bos taurus GN=ARMC5 PE=4 SV=2
	REVERSE_tr|E1BK38|E1BK38_BOVIN-R	Uncharacterized protein (Fragment) OS=Bos taurus GN=ABCA13 PE=4 SV=2
	REVERSE_tr|E1BIE4|E1BIE4_BOVIN-R	Uncharacterized protein OS=Bos taurus GN=EPHB4 PE=4 SV=2
	REVERSE_tr|E1BFC5|E1BFC5_BOVIN-R	Uncharacterized protein OS=Bos taurus GN=FAM222B PE=4 SV=1
	REVERSE_tr|E1BFC3|E1BFC3_BOVIN-R	Uncharacterized protein OS=Bos taurus GN=DFNA5 PE=4 SV=1
	REVERSE_tr|E1BEH3|E1BEH3_BOVIN-R	Uncharacterized protein (Fragment) OS=Bos taurus GN=KCNK15 PE=3 SV=2
	REVERSE_tr|E1BC24|E1BC24_BOVIN-R	Midasin OS=Bos taurus GN=MDN1 PE=3 SV=2
	REVERSE_tr|E1BB39|E1BB39_BOVIN-R	Uncharacterized protein OS=Bos taurus GN=VWA5B1 PE=4 SV=2
	REVERSE_tr|E1BAS5|E1BAS5_BOVIN-R	Insulin-like 3 OS=Bos taurus GN=RLF PE=4 SV=2
	REVERSE_tr|E1B9N6|E1B9N6_BOVIN-R	Uncharacterized protein OS=Bos taurus GN=EVPL PE=4 SV=1
	REVERSE_tr|E1B828|E1B828_BOVIN-R	Uncharacterized protein OS=Bos taurus GN=LEMD2 PE=4 SV=1
	REVERSE_tr|A7MBG2|A7MBG2_BOVIN-R	FAM108B1 protein OS=Bos taurus GN=FAM108B1 PE=2 SV=1
	REVERSE_sp|Q3T131|COQ3_BOVIN-R	Hexaprenyldihydroxybenzoate methyltransferase, mitochondrial OS=Bos taurus GN=COQ3 PE=2 SV=1
	REVERSE_sp|Q2NKY8|DHX30_BOVIN-R	Putative ATP-dependent RNA helicase DHX30 OS=Bos taurus GN=DHX30 PE=2 SV=1
	REVERSE_sp|Q2KI85|SMTL2_BOVIN-R	Smoothelin-like protein 2 OS=Bos taurus GN=SMTNL2 PE=2 SV=1
	REVERSE_sp|Q24K02|IDE_BOVIN-R	Insulin-degrading enzyme OS=Bos taurus GN=IDE PE=2 SV=1
	REVERSE_sp|Q1JQA0|PPT2_BOVIN-R	Lysosomal thioesterase PPT2 OS=Bos taurus GN=PPT2 PE=2 SV=1
	REVERSE_sp|Q0P565|HDDC2_BOVIN-R	HD domain-containing protein 2 OS=Bos taurus GN=HDDC2 PE=2 SV=1
	REVERSE_sp|P82919|RT18A_BOVIN-R	28S ribosomal protein S18a, mitochondrial OS=Bos taurus GN=MRPS18A PE=1 SV=3
	REVERSE_sp|P32749|CHLE_BOVIN-R	Cholinesterase OS=Bos taurus GN=BCHE PE=2 SV=2
	REVERSE_sp|P27922|SC6A3_BOVIN-R	Sodium-dependent dopamine transporter OS=Bos taurus GN=SLC6A3 PE=2 SV=1
	REVERSE_sp|A6QP70|SGCB_BOVIN-R	Beta-sarcoglycan OS=Bos taurus GN=SGCB PE=2 SV=1
	REVERSE_sp|A5D979|SPRTN_BOVIN-R	SprT-like domain-containing protein Spartan OS=Bos taurus GN=SPRTN PE=2 SV=1
	Total	1289

## Sheet: OEC-48
	OEC-48: Total proteins identified
	Accession	Protein Name
	sp|P02769|ALBU_BOVIN	Serum albumin OS=Bos taurus GN=ALB PE=1 SV=4
	sp|Q2UVX4|CO3_BOVIN	Complement C3 OS=Bos taurus GN=C3 PE=1 SV=2
	sp|Q7SIH1|A2MG_BOVIN	Alpha-2-macroglobulin OS=Bos taurus GN=A2M PE=1 SV=2
	sp|P31976|EZRI_BOVIN	Ezrin OS=Bos taurus GN=EZR PE=1 SV=2
	sp|Q76LV2|HS90A_BOVIN	Heat shock protein HSP 90-alpha OS=Bos taurus GN=HSP90AA1 PE=1 SV=3
	sp|P07589|FINC_BOVIN	Fibronectin OS=Bos taurus GN=FN1 PE=1 SV=4
	sp|Q0VCX2|GRP78_BOVIN	78 kDa glucose-regulated protein OS=Bos taurus GN=HSPA5 PE=2 SV=1
	sp|Q3SYU2|EF2_BOVIN	Elongation factor 2 OS=Bos taurus GN=EEF2 PE=2 SV=3
	sp|Q9HWK6|LYSC_PSEAE	Lysyl endopeptidase OS=Pseudomonas aeruginosa (strain ATCC 15692 / PAO1 / 1C / PRS 101 / LMG 12228) GN=prpL PE=1 SV=1
	tr|Q0P5D6|Q0P5D6_BOVIN	Retinoic acid receptor responder (Tazarotene induced) 1 OS=Bos taurus GN=RARRES1 PE=2 SV=1
	tr|G3X757|G3X757_BOVIN	Transitional endoplasmic reticulum ATPase OS=Bos taurus GN=VCP PE=4 SV=1
	sp|P17697|CLUS_BOVIN	Clusterin OS=Bos taurus GN=CLU PE=1 SV=1
	sp|Q9XSJ4|ENOA_BOVIN	Alpha-enolase OS=Bos taurus GN=ENO1 PE=1 SV=4
	sp|P04272|ANXA2_BOVIN	Annexin A2 OS=Bos taurus GN=ANXA2 PE=1 SV=2
	sp|A5D7D1|ACTN4_BOVIN	Alpha-actinin-4 OS=Bos taurus GN=ACTN4 PE=2 SV=1
	tr|A5D984|A5D984_BOVIN	Pyruvate kinase OS=Bos taurus GN=PKM2 PE=2 SV=1
	tr|F1MM32|F1MM32_BOVIN	Sulfhydryl oxidase OS=Bos taurus GN=QSOX1 PE=3 SV=2
	sp|P81187|CFAB_BOVIN	Complement factor B OS=Bos taurus GN=CFB PE=1 SV=2
	tr|A5D7E8|A5D7E8_BOVIN	PDIA3 protein OS=Bos taurus GN=PDIA3 PE=2 SV=1
	sp|P19120|HSP7C_BOVIN	Heat shock cognate 71 kDa protein OS=Bos taurus GN=HSPA8 PE=1 SV=2
	sp|Q95M18|ENPL_BOVIN	Endoplasmin OS=Bos taurus GN=HSP90B1 PE=2 SV=1
	sp|Q05589|UROK_BOVIN	Urokinase-type plasminogen activator OS=Bos taurus GN=PLAU PE=2 SV=1
	tr|Q2HJ34|Q2HJ34_BOVIN	Nephroblastoma overexpressed OS=Bos taurus GN=NOV PE=2 SV=1
	sp|Q95114|MFGM_BOVIN	Lactadherin OS=Bos taurus GN=MFGE8 PE=1 SV=2
	sp|Q3T0P6|PGK1_BOVIN	Phosphoglycerate kinase 1 OS=Bos taurus GN=PGK1 PE=2 SV=3
	sp|P15497|APOA1_BOVIN	Apolipoprotein A-I OS=Bos taurus GN=APOA1 PE=1 SV=3
	sp|P10096|G3P_BOVIN	Glyceraldehyde-3-phosphate dehydrogenase OS=Bos taurus GN=GAPDH PE=1 SV=4
	sp|P46193|ANXA1_BOVIN	Annexin A1 OS=Bos taurus GN=ANXA1 PE=2 SV=2
	sp|Q5E956|TPIS_BOVIN	Triosephosphate isomerase OS=Bos taurus GN=TPI1 PE=2 SV=3
	sp|Q3ZBD7|G6PI_BOVIN	Glucose-6-phosphate isomerase OS=Bos taurus GN=GPI PE=2 SV=4
	sp|Q2HJ49|MOES_BOVIN	Moesin OS=Bos taurus GN=MSN PE=2 SV=3
	tr|A6QLL8|A6QLL8_BOVIN	Fructose-bisphosphate aldolase OS=Bos taurus GN=ALDOA PE=2 SV=1
	sp|P04264|K2C1_HUMAN	Keratin, type II cytoskeletal 1 OS=Homo sapiens GN=KRT1 PE=1 SV=6
	sp|P34955|A1AT_BOVIN	Alpha-1-antiproteinase OS=Bos taurus GN=SERPINA1 PE=1 SV=1
	sp|P48644|AL1A1_BOVIN	Retinal dehydrogenase 1 OS=Bos taurus GN=ALDH1A1 PE=2 SV=3
	tr|A6H7J6|A6H7J6_BOVIN	P4HB protein OS=Bos taurus GN=P4HB PE=2 SV=1
	sp|P50291|FST_BOVIN	Follistatin OS=Bos taurus GN=FST PE=2 SV=2
	sp|P12763|FETUA_BOVIN	Alpha-2-HS-glycoprotein OS=Bos taurus GN=AHSG PE=1 SV=2
	sp|P00761|TRYP_PIG	Trypsin OS=Sus scrofa PE=1 SV=1
	sp|Q95L54|ANXA8_BOVIN	Annexin A8 OS=Bos taurus GN=ANXA8 PE=2 SV=1
	tr|F1MEN8|F1MEN8_BOVIN	Protein disulfide-isomerase A4 OS=Bos taurus GN=PDIA4 PE=2 SV=1
	sp|Q76LV1|HS90B_BOVIN	Heat shock protein HSP 90-beta OS=Bos taurus GN=HSP90AB1 PE=2 SV=3
	sp|P55859|PNPH_BOVIN	Purine nucleoside phosphorylase OS=Bos taurus GN=PNP PE=1 SV=3
	sp|P19858|LDHA_BOVIN	L-lactate dehydrogenase A chain OS=Bos taurus GN=LDHA PE=2 SV=2
	sp|Q0VCM4|PYGL_BOVIN	Glycogen phosphorylase, liver form OS=Bos taurus GN=PYGL PE=2 SV=1
	sp|P25975|CATL1_BOVIN	Cathepsin L1 OS=Bos taurus GN=CTSL PE=1 SV=3
	sp|Q3B7N2|ACTN1_BOVIN	Alpha-actinin-1 OS=Bos taurus GN=ACTN1 PE=2 SV=1
	sp|P24627|TRFL_BOVIN	Lactotransferrin OS=Bos taurus GN=LTF PE=1 SV=2
	sp|P62935|PPIA_BOVIN	Peptidyl-prolyl cis-trans isomerase A OS=Bos taurus GN=PPIA PE=1 SV=2
	sp|P26779|SAP_BOVIN	Prosaposin OS=Bos taurus GN=PSAP PE=1 SV=3
	tr|F1N5M2|F1N5M2_BOVIN	Vitamin D-binding protein OS=Bos taurus GN=GC PE=4 SV=2
	sp|A3KMV5|UBA1_BOVIN	Ubiquitin-like modifier-activating enzyme 1 OS=Bos taurus GN=UBA1 PE=2 SV=1
	sp|P35527|K1C9_HUMAN	Keratin, type I cytoskeletal 9 OS=Homo sapiens GN=KRT9 PE=1 SV=3
	sp|Q28198|TPA_BOVIN	Tissue-type plasminogen activator OS=Bos taurus GN=PLAT PE=2 SV=1
	sp|Q32PF2|ACLY_BOVIN	ATP-citrate synthase OS=Bos taurus GN=ACLY PE=2 SV=1
	tr|E1B7R4|E1B7R4_BOVIN	Eukaryotic translation initiation factor 3 subunit A OS=Bos taurus GN=EIF3A PE=3 SV=2
	sp|Q7YRQ8|TFPI2_BOVIN	Tissue factor pathway inhibitor 2 OS=Bos taurus GN=TFPI2 PE=2 SV=1
	tr|F1MTV9|F1MTV9_BOVIN	Nucleophosmin OS=Bos taurus GN=NPM1 PE=4 SV=2
	sp|Q3T149|HSPB1_BOVIN	Heat shock protein beta-1 OS=Bos taurus GN=HSPB1 PE=2 SV=1
	sp|Q3ZCH5|ZA2G_BOVIN	Zinc-alpha-2-glycoprotein OS=Bos taurus GN=AZGP1 PE=2 SV=1
	sp|P13645|K1C10_HUMAN	Keratin, type I cytoskeletal 10 OS=Homo sapiens GN=KRT10 PE=1 SV=6
	sp|Q3ZC84|CNDP2_BOVIN	Cytosolic non-specific dipeptidase OS=Bos taurus GN=CNDP2 PE=2 SV=1
	sp|Q32LP2|RADI_BOVIN	Radixin OS=Bos taurus GN=RDX PE=2 SV=1
	sp|P50397|GDIB_BOVIN	Rab GDP dissociation inhibitor beta OS=Bos taurus GN=GDI2 PE=2 SV=3
	sp|P63103|1433Z_BOVIN	14-3-3 protein zeta/delta OS=Bos taurus GN=YWHAZ PE=1 SV=1
	tr|F1MUK3|F1MUK3_BOVIN	Insulin-like growth factor-binding protein 6 OS=Bos taurus GN=IGFBP6 PE=4 SV=1
	sp|Q3ZCI9|TCPQ_BOVIN	T-complex protein 1 subunit theta OS=Bos taurus GN=CCT8 PE=1 SV=3
	tr|A6QP39|A6QP39_BOVIN	MSLN protein OS=Bos taurus GN=MSLN PE=2 SV=1
	sp|P31096|OSTP_BOVIN	Osteopontin OS=Bos taurus GN=SPP1 PE=1 SV=2
	sp|Q3T0K2|TCPG_BOVIN	T-complex protein 1 subunit gamma OS=Bos taurus GN=CCT3 PE=1 SV=1
	tr|F1N430|F1N430_BOVIN	Metalloproteinase inhibitor 2 OS=Bos taurus GN=TIMP2 PE=2 SV=1
	sp|O77834|PRDX6_BOVIN	Peroxiredoxin-6 OS=Bos taurus GN=PRDX6 PE=1 SV=3
	sp|P17248|SYWC_BOVIN	Tryptophan--tRNA ligase, cytoplasmic OS=Bos taurus GN=WARS PE=1 SV=3
	sp|P49951|CLH1_BOVIN	Clathrin heavy chain 1 OS=Bos taurus GN=CLTC PE=1 SV=1
	sp|P62261|1433E_BOVIN	14-3-3 protein epsilon OS=Bos taurus GN=YWHAE PE=2 SV=1
	sp|Q0P569|NUCB1_BOVIN	Nucleobindin-1 OS=Bos taurus GN=NUCB1 PE=2 SV=1
	sp|Q5E9B7|CLIC1_BOVIN	Chloride intracellular channel protein 1 OS=Bos taurus GN=CLIC1 PE=2 SV=3
	sp|F1N152|HTRA1_BOVIN	Serine protease HTRA1 OS=Bos taurus GN=HTRA1 PE=2 SV=1
	tr|F1N455|F1N455_BOVIN	Dipeptidyl peptidase 1 OS=Bos taurus GN=CTSC PE=3 SV=1
	sp|Q5E947|PRDX1_BOVIN	Peroxiredoxin-1 OS=Bos taurus GN=PRDX1 PE=2 SV=1
	sp|Q2NKZ1|TCPH_BOVIN	T-complex protein 1 subunit eta OS=Bos taurus GN=CCT7 PE=1 SV=1
	sp|P02584|PROF1_BOVIN	Profilin-1 OS=Bos taurus GN=PFN1 PE=1 SV=2
	sp|Q5E9F7|COF1_BOVIN	Cofilin-1 OS=Bos taurus GN=CFL1 PE=2 SV=3
	sp|Q28042|OVGP1_BOVIN	Oviduct-specific glycoprotein (Fragment) OS=Bos taurus GN=OVGP1 PE=1 SV=1
	sp|Q3SZK8|NHRF1_BOVIN	Na(+)/H(+) exchange regulatory cofactor NHE-RF1 OS=Bos taurus GN=SLC9A3R1 PE=2 SV=1
	sp|Q3ZBZ8|STIP1_BOVIN	Stress-induced-phosphoprotein 1 OS=Bos taurus GN=STIP1 PE=2 SV=1
	tr|Q3ZCI4|Q3ZCI4_BOVIN	6-phosphogluconate dehydrogenase, decarboxylating OS=Bos taurus GN=PGD PE=2 SV=2
	tr|A6QPW7|A6QPW7_BOVIN	TNFRSF6B protein OS=Bos taurus GN=TNFRSF6B PE=2 SV=1
	tr|A6QNL5|A6QNL5_BOVIN	PDIA6 protein (Fragment) OS=Bos taurus GN=PDIA6 PE=2 SV=1
	tr|F6S1Q0|F6S1Q0_BOVIN	Uncharacterized protein OS=Bos taurus GN=KRT18 PE=2 SV=1
	sp|Q3ZBH0|TCPB_BOVIN	T-complex protein 1 subunit beta OS=Bos taurus GN=CCT2 PE=1 SV=3
	tr|G5E531|G5E531_BOVIN	T-complex protein 1 subunit alpha OS=Bos taurus GN=TCP1 PE=3 SV=1
	sp|O77588|PLOD1_BOVIN	Procollagen-lysine,2-oxoglutarate 5-dioxygenase 1 OS=Bos taurus GN=PLOD1 PE=2 SV=2
	sp|P08728|K1C19_BOVIN	Keratin, type I cytoskeletal 19 OS=Bos taurus GN=KRT19 PE=2 SV=1
	sp|Q28085|CFAH_BOVIN	Complement factor H OS=Bos taurus GN=CFH PE=1 SV=3
	sp|Q58DW0|RL4_BOVIN	60S ribosomal protein L4 OS=Bos taurus GN=RPL4 PE=2 SV=3
	sp|P09867|ROA1_BOVIN	Heterogeneous nuclear ribonucleoprotein A1 OS=Bos taurus GN=HNRNPA1 PE=1 SV=2
	sp|P13214|ANXA4_BOVIN	Annexin A4 OS=Bos taurus GN=ANXA4 PE=1 SV=2
	sp|P19803|GDIR1_BOVIN	Rho GDP-dissociation inhibitor 1 OS=Bos taurus GN=ARHGDIA PE=1 SV=3
	sp|Q3ZBV8|SYTC_BOVIN	Threonine--tRNA ligase, cytoplasmic OS=Bos taurus GN=TARS PE=2 SV=1
	tr|F1N1I6|F1N1I6_BOVIN	Gelsolin OS=Bos taurus GN=GSN PE=2 SV=1
	tr|F1N0E5|F1N0E5_BOVIN	T-complex protein 1 subunit delta OS=Bos taurus GN=CCT4 PE=3 SV=2
	sp|Q2HJ60|ROA2_BOVIN	Heterogeneous nuclear ribonucleoproteins A2/B1 OS=Bos taurus GN=HNRNPA2B1 PE=2 SV=1
	sp|Q5E946|PARK7_BOVIN	Protein DJ-1 OS=Bos taurus GN=PARK7 PE=2 SV=1
	sp|Q9TRY0|FKBP4_BOVIN	Peptidyl-prolyl cis-trans isomerase FKBP4 OS=Bos taurus GN=FKBP4 PE=1 SV=4
	sp|P20959|IBP3_BOVIN	Insulin-like growth factor-binding protein 3 OS=Bos taurus GN=IGFBP3 PE=1 SV=3
	sp|P20414|TIMP1_BOVIN	Metalloproteinase inhibitor 1 OS=Bos taurus GN=TIMP1 PE=1 SV=1
	sp|P10103|HMGB1_BOVIN	High mobility group protein B1 OS=Bos taurus GN=HMGB1 PE=1 SV=3
	sp|Q3T145|MDHC_BOVIN	Malate dehydrogenase, cytoplasmic OS=Bos taurus GN=MDH1 PE=2 SV=3
	tr|F1MAZ3|F1MAZ3_BOVIN	Microtubule-associated protein OS=Bos taurus GN=MAP4 PE=2 SV=2
	sp|Q3MHL7|TCPZ_BOVIN	T-complex protein 1 subunit zeta OS=Bos taurus GN=CCT6A PE=1 SV=3
	sp|Q5E9B1|LDHB_BOVIN	L-lactate dehydrogenase B chain OS=Bos taurus GN=LDHB PE=2 SV=4
	sp|P10462|S10A2_BOVIN	Protein S100-A2 OS=Bos taurus GN=S100A2 PE=1 SV=1
	sp|Q0VCK0|PUR9_BOVIN	Bifunctional purine biosynthesis protein PURH OS=Bos taurus GN=ATIC PE=2 SV=1
	sp|Q3SZV3|EF1G_BOVIN	Elongation factor 1-gamma OS=Bos taurus GN=EEF1G PE=2 SV=1
	sp|Q56JV9|RS3A_BOVIN	40S ribosomal protein S3a OS=Bos taurus GN=RPS3A PE=2 SV=3
	sp|Q9MZ08|BCAM_BOVIN	Basal cell adhesion molecule OS=Bos taurus GN=BCAM PE=2 SV=2
	tr|Q08E54|Q08E54_BOVIN	Amyloid beta (A4) protein OS=Bos taurus GN=APP PE=2 SV=1
	tr|A2VE41|A2VE41_BOVIN	EGF-containing fibulin-like extracellular matrix protein 1 OS=Bos taurus GN=EFEMP1 PE=2 SV=1
	tr|F1MMK2|F1MMK2_BOVIN	Glucose-6-phosphate 1-dehydrogenase OS=Bos taurus GN=G6PD PE=3 SV=1
	sp|Q9BGI3|PRDX2_BOVIN	Peroxiredoxin-2 OS=Bos taurus GN=PRDX2 PE=2 SV=1
	tr|Q3SZA6|Q3SZA6_BOVIN	Syndecan binding protein (Syntenin) OS=Bos taurus GN=SDCBP PE=2 SV=1
	sp|Q3MHL4|SAHH_BOVIN	Adenosylhomocysteinase OS=Bos taurus GN=AHCY PE=2 SV=3
	sp|Q9XSG3|IDHC_BOVIN	Isocitrate dehydrogenase [NADP] cytoplasmic OS=Bos taurus GN=IDH1 PE=2 SV=1
	tr|G5E5C8|G5E5C8_BOVIN	Transaldolase OS=Bos taurus GN=TALDO1 PE=2 SV=1
	sp|P86435|VGF_BOVIN	Neurosecretory protein VGF OS=Bos taurus GN=VGF PE=1 SV=2
	sp|O97680|THIO_BOVIN	Thioredoxin OS=Bos taurus GN=TXN PE=3 SV=3
	sp|Q29S21|K2C7_BOVIN	Keratin, type II cytoskeletal 7 OS=Bos taurus GN=KRT7 PE=2 SV=1
	sp|O18739|CTGF_BOVIN	Connective tissue growth factor OS=Bos taurus GN=CTGF PE=2 SV=2
	tr|A5D7V3|A5D7V3_BOVIN	ESM1 protein OS=Bos taurus GN=ESM1 PE=2 SV=1
	tr|F1MZ58|F1MZ58_BOVIN	Low-density lipoprotein receptor OS=Bos taurus GN=LDLR PE=4 SV=2
	sp|P35908|K22E_HUMAN	Keratin, type II cytoskeletal 2 epidermal OS=Homo sapiens GN=KRT2 PE=1 SV=2
	sp|A6QLN9|VWA1_BOVIN	von Willebrand factor A domain-containing protein 1 OS=Bos taurus PE=2 SV=1
	tr|Q3ZC35|Q3ZC35_BOVIN	Cysteine-rich, angiogenic inducer, 61 OS=Bos taurus GN=CYR61 PE=2 SV=1
	sp|P13213|SPRC_BOVIN	SPARC OS=Bos taurus GN=SPARC PE=1 SV=2
	sp|Q3T169|RS3_BOVIN	40S ribosomal protein S3 OS=Bos taurus GN=RPS3 PE=2 SV=1
	tr|A3KLR9|A3KLR9_BOVIN	Superoxide dismutase [Cu-Zn] OS=Bos taurus GN=ECSOD PE=2 SV=1
	tr|A6QR15|A6QR15_BOVIN	LOC535277 protein OS=Bos taurus GN=LOC535277 PE=2 SV=1
	sp|Q28034|GLU2B_BOVIN	Glucosidase 2 subunit beta OS=Bos taurus GN=PRKCSH PE=2 SV=1
	sp|Q3B7M5|LASP1_BOVIN	LIM and SH3 domain protein 1 OS=Bos taurus GN=LASP1 PE=2 SV=1
	sp|Q9XSA7|CLIC4_BOVIN	Chloride intracellular channel protein 4 OS=Bos taurus GN=CLIC4 PE=2 SV=3
	sp|P00727|AMPL_BOVIN	Cytosol aminopeptidase OS=Bos taurus GN=LAP3 PE=1 SV=3
	sp|P13696|PEBP1_BOVIN	Phosphatidylethanolamine-binding protein 1 OS=Bos taurus GN=PEBP1 PE=1 SV=2
	sp|Q58DW5|RL5_BOVIN	60S ribosomal protein L5 OS=Bos taurus GN=RPL5 PE=2 SV=3
	sp|P80311|PPIB_BOVIN	Peptidyl-prolyl cis-trans isomerase B OS=Bos taurus GN=PPIB PE=1 SV=4
	sp|G3X745|GPC1_BOVIN	Glypican-1 OS=Bos taurus GN=GPC1 PE=2 SV=1
	sp|P79103|RS4_BOVIN	40S ribosomal protein S4 OS=Bos taurus GN=RPS4 PE=2 SV=3
	sp|A7MB70|SEM3C_BOVIN	Semaphorin-3C OS=Bos taurus GN=SEMA3C PE=2 SV=1
	sp|Q8MJ24|LOXL4_BOVIN	Lysyl oxidase homolog 4 OS=Bos taurus GN=LOXL4 PE=2 SV=1
	sp|Q3ZBZ1|CAB45_BOVIN	45 kDa calcium-binding protein OS=Bos taurus GN=SDF4 PE=2 SV=1
	tr|Q3ZBH5|Q3ZBH5_BOVIN	Proliferation-associated 2G4, 38kDa OS=Bos taurus GN=PA2G4 PE=2 SV=1
	sp|Q3T0L2|ERP44_BOVIN	Endoplasmic reticulum resident protein 44 OS=Bos taurus GN=ERP44 PE=2 SV=1
	sp|P01888|B2MG_BOVIN	Beta-2-microglobulin OS=Bos taurus GN=B2M PE=1 SV=2
	tr|F1MUZ9|F1MUZ9_BOVIN	60 kDa heat shock protein, mitochondrial OS=Bos taurus GN=HSPD1 PE=3 SV=1
	sp|Q769I5|MET_BOVIN	Hepatocyte growth factor receptor OS=Bos taurus GN=MET PE=2 SV=1
	sp|A5PK39|TPP2_BOVIN	Tripeptidyl-peptidase 2 OS=Bos taurus GN=TPP2 PE=2 SV=1
	sp|Q0IIM3|HS105_BOVIN	Heat shock protein 105 kDa OS=Bos taurus GN=HSPH1 PE=2 SV=1
	sp|A0JNL5|LY66C_BOVIN	Lymphocyte antigen 6 complex locus protein G6c OS=Bos taurus GN=LY6G6C PE=2 SV=1
	sp|Q32LE5|ASGL1_BOVIN	Isoaspartyl peptidase/L-asparaginase OS=Bos taurus GN=ASRGL1 PE=2 SV=1
	sp|Q3T0Q4|NDKB_BOVIN	Nucleoside diphosphate kinase B OS=Bos taurus GN=NME2 PE=1 SV=1
	sp|Q3T0X5|PSA1_BOVIN	Proteasome subunit alpha type-1 OS=Bos taurus GN=PSMA1 PE=1 SV=1
	sp|Q5E984|TCTP_BOVIN	Translationally-controlled tumor protein OS=Bos taurus GN=TPT1 PE=2 SV=1
	sp|A6H742|PLSI_BOVIN	Plastin-1 OS=Bos taurus GN=PLS1 PE=2 SV=1
	sp|Q2TBQ5|RL7A_BOVIN	60S ribosomal protein L7a OS=Bos taurus GN=RPL7A PE=2 SV=3
	sp|Q58DQ3|RL6_BOVIN	60S ribosomal protein L6 OS=Bos taurus GN=RPL6 PE=2 SV=3
	sp|P02070|HBB_BOVIN	Hemoglobin subunit beta OS=Bos taurus GN=HBB PE=1 SV=1
	sp|Q17QG2|NUDC_BOVIN	Nuclear migration protein nudC OS=Bos taurus GN=NUDC PE=2 SV=1
	sp|Q2YDE4|PSA6_BOVIN	Proteasome subunit alpha type-6 OS=Bos taurus GN=PSMA6 PE=1 SV=1
	sp|Q3SZH7|LKHA4_BOVIN	Leukotriene A-4 hydrolase OS=Bos taurus GN=LTA4H PE=2 SV=3
	sp|Q5E9G3|PSME2_BOVIN	Proteasome activator complex subunit 2 OS=Bos taurus GN=PSME2 PE=1 SV=3
	sp|Q863B3|SND1_BOVIN	Staphylococcal nuclease domain-containing protein 1 OS=Bos taurus GN=SND1 PE=1 SV=1
	tr|F1N7D7|F1N7D7_BOVIN	Dystroglycan OS=Bos taurus GN=DAG1 PE=4 SV=1
	tr|F1MM34|F1MM34_BOVIN	Catenin alpha-1 OS=Bos taurus GN=CTNNA1 PE=4 SV=2
	sp|Q3T0Y5|PSA2_BOVIN	Proteasome subunit alpha type-2 OS=Bos taurus GN=PSMA2 PE=1 SV=3
	sp|Q3ZBG0|PSA7_BOVIN	Proteasome subunit alpha type-7 OS=Bos taurus GN=PSMA7 PE=1 SV=1
	tr|A6QLZ0|A6QLZ0_BOVIN	Galectin OS=Bos taurus GN=LGALS3 PE=2 SV=1
	sp|P33097|AATC_BOVIN	Aspartate aminotransferase, cytoplasmic OS=Bos taurus GN=GOT1 PE=1 SV=3
	tr|A5D7A2|A5D7A2_BOVIN	GARS protein OS=Bos taurus GN=GARS PE=2 SV=1
	tr|F1MBS3|F1MBS3_BOVIN	Transforming growth factor-beta-induced protein ig-h3 (Fragment) OS=Bos taurus GN=TGFBI PE=4 SV=2
	tr|F1N3H1|F1N3H1_BOVIN	Calumenin OS=Bos taurus GN=CALU PE=4 SV=1
	sp|P35466|S10A4_BOVIN	Protein S100-A4 OS=Bos taurus GN=S100A4 PE=1 SV=2
	tr|G3X7D2|G3X7D2_BOVIN	Chitinase-3-like protein 1 OS=Bos taurus GN=CHI3L1 PE=3 SV=1
	sp|P28801|GSTP1_BOVIN	Glutathione S-transferase P OS=Bos taurus GN=GSTP1 PE=1 SV=2
	sp|P63258|ACTG_BOVIN	Actin, cytoplasmic 2 OS=Bos taurus GN=ACTG1 PE=1 SV=1
	sp|A7MBJ5|CAND1_BOVIN	Cullin-associated NEDD8-dissociated protein 1 OS=Bos taurus GN=CAND1 PE=2 SV=1
	sp|P68509|1433F_BOVIN	14-3-3 protein eta OS=Bos taurus GN=YWHAH PE=1 SV=2
	tr|A6QLT9|A6QLT9_BOVIN	AARS protein OS=Bos taurus GN=AARS PE=2 SV=1
	tr|A7Z057|A7Z057_BOVIN	14-3-3 protein gamma OS=Bos taurus GN=YWHAG PE=2 SV=1
	sp|O18789|RS2_BOVIN	40S ribosomal protein S2 OS=Bos taurus GN=RPS2 PE=2 SV=2
	sp|P60661|MYL6_BOVIN	Myosin light polypeptide 6 OS=Bos taurus GN=MYL6 PE=2 SV=2
	sp|Q3T0R1|RS18_BOVIN	40S ribosomal protein S18 OS=Bos taurus GN=RPS18 PE=2 SV=3
	tr|A6QQ11|A6QQ11_BOVIN	PGM2 protein (Fragment) OS=Bos taurus GN=PGM2 PE=2 SV=1
	tr|Q2KJE7|Q2KJE7_BOVIN	Proteasome (Prosome, macropain) activator subunit 1 (PA28 alpha) OS=Bos taurus GN=PSME1 PE=2 SV=1
	sp|A1A4J1|K6PL_BOVIN	6-phosphofructokinase, liver type OS=Bos taurus GN=PFKL PE=2 SV=1
	sp|Q2KIS7|TETN_BOVIN	Tetranectin OS=Bos taurus GN=CLEC3B PE=2 SV=1
	sp|P26882|PPID_BOVIN	Peptidyl-prolyl cis-trans isomerase D OS=Bos taurus GN=PPID PE=1 SV=6
	sp|P30932|CD9_BOVIN	CD9 antigen OS=Bos taurus GN=CD9 PE=2 SV=2
	sp|Q28022|MFAP5_BOVIN	Microfibrillar-associated protein 5 OS=Bos taurus GN=MFAP5 PE=1 SV=1
	sp|Q3SZ62|PGAM1_BOVIN	Phosphoglycerate mutase 1 OS=Bos taurus GN=PGAM1 PE=2 SV=3
	sp|Q5EAC6|CDC37_BOVIN	Hsp90 co-chaperone Cdc37 OS=Bos taurus GN=CDC37 PE=2 SV=1
	sp|Q6EWQ7|IF5A1_BOVIN	Eukaryotic translation initiation factor 5A-1 OS=Bos taurus GN=EIF5A PE=2 SV=3
	sp|Q95140|RLA0_BOVIN	60S acidic ribosomal protein P0 OS=Bos taurus GN=RPLP0 PE=2 SV=3
	tr|Q1RMR3|Q1RMR3_BOVIN	Cortactin OS=Bos taurus GN=CTTN PE=2 SV=1
	tr|F1MHN8|F1MHN8_BOVIN	CD166 antigen OS=Bos taurus GN=ALCAM PE=4 SV=2
	sp|Q3SZI4|1433T_BOVIN	14-3-3 protein theta OS=Bos taurus GN=YWHAQ PE=2 SV=1
	tr|A1L5B7|A1L5B7_BOVIN	SERPINE1 mRNA binding protein 1 OS=Bos taurus GN=SERBP1 PE=2 SV=1
	tr|G5E589|G5E589_BOVIN	Proteasome subunit beta type OS=Bos taurus GN=PSMB1 PE=3 SV=1
	sp|P07688|CATB_BOVIN	Cathepsin B OS=Bos taurus GN=CTSB PE=1 SV=5
	sp|Q1LZA3|ASNS_BOVIN	Asparagine synthetase [glutamine-hydrolyzing] OS=Bos taurus GN=ASNS PE=2 SV=3
	sp|A2I7N3|SPA37_BOVIN	Serpin A3-7 OS=Bos taurus GN=SERPINA3-7 PE=3 SV=1
	sp|A6H7G2|DBNL_BOVIN	Drebrin-like protein OS=Bos taurus GN=DBNL PE=2 SV=1
	sp|P26452|RSSA_BOVIN	40S ribosomal protein SA OS=Bos taurus GN=RPSA PE=2 SV=4
	sp|P61157|ARP3_BOVIN	Actin-related protein 3 OS=Bos taurus GN=ACTR3 PE=1 SV=3
	sp|P80513|MANF_BOVIN	Mesencephalic astrocyte-derived neurotrophic factor OS=Bos taurus GN=MANF PE=1 SV=2
	sp|O02853|PTGDS_BOVIN	Prostaglandin-H2 D-isomerase OS=Bos taurus GN=PTGDS PE=1 SV=1
	sp|P53712|ITB1_BOVIN	Integrin beta-1 OS=Bos taurus GN=ITGB1 PE=1 SV=3
	sp|Q3MI05|PPGB_BOVIN	Lysosomal protective protein OS=Bos taurus GN=CTSA PE=2 SV=1
	sp|Q3SZ54|IF4A1_BOVIN	Eukaryotic initiation factor 4A-I OS=Bos taurus GN=EIF4A1 PE=2 SV=1
	tr|Q1RMM9|Q1RMM9_BOVIN	Alpha-N-acetylgalactosaminidase OS=Bos taurus GN=NAGA PE=2 SV=1
	sp|P56701|PSMD2_BOVIN	26S proteasome non-ATPase regulatory subunit 2 OS=Bos taurus GN=PSMD2 PE=1 SV=2
	sp|Q3MHF7|MTAP_BOVIN	S-methyl-5'-thioadenosine phosphorylase OS=Bos taurus GN=MTAP PE=1 SV=1
	sp|Q3T0D0|HNRPK_BOVIN	Heterogeneous nuclear ribonucleoprotein K OS=Bos taurus GN=HNRNPK PE=2 SV=1
	sp|Q3ZCJ2|AK1A1_BOVIN	Alcohol dehydrogenase [NADP(+)] OS=Bos taurus GN=AKR1A1 PE=2 SV=1
	sp|Q6Q137|SEPT7_BOVIN	Septin-7 OS=Bos taurus GN=SEPT7 PE=2 SV=2
	sp|Q2KHU8|IF2G_BOVIN	Eukaryotic translation initiation factor 2 subunit 3 OS=Bos taurus GN=EIF2S3 PE=2 SV=1
	tr|A6H7H6|A6H7H6_BOVIN	CDH17 protein OS=Bos taurus GN=CDH17 PE=2 SV=1
	tr|Q2KJJ7|Q2KJJ7_BOVIN	Serine peptidase inhibitor, Kunitz type 1 OS=Bos taurus GN=SPINT1 PE=2 SV=1
	sp|P15396|ENPP3_BOVIN	Ectonucleotide pyrophosphatase/phosphodiesterase family member 3 OS=Bos taurus GN=ENPP3 PE=1 SV=2
	sp|P80724|BASP1_BOVIN	Brain acid soluble protein 1 OS=Bos taurus GN=BASP1 PE=1 SV=3
	sp|Q3T0Z7|DHPR_BOVIN	Dihydropteridine reductase OS=Bos taurus GN=QDPR PE=2 SV=1
	tr|A7MBG8|A7MBG8_BOVIN	RUVBL1 protein OS=Bos taurus GN=RUVBL1 PE=2 SV=1
	tr|A8E4L8|A8E4L8_BOVIN	LMO7 protein OS=Bos taurus GN=LMO7 PE=2 SV=1
	sp|Q2NKY7|SEPT2_BOVIN	Septin-2 OS=Bos taurus GN=SEPT2 PE=2 SV=1
	sp|Q5EA61|KCRB_BOVIN	Creatine kinase B-type OS=Bos taurus GN=CKB PE=2 SV=1
	tr|F1MMK8|F1MMK8_BOVIN	Lysine--tRNA ligase OS=Bos taurus GN=KARS PE=3 SV=1
	sp|Q05927|5NTD_BOVIN	5'-nucleotidase OS=Bos taurus GN=NT5E PE=1 SV=2
	tr|F6QEL0|F6QEL0_BOVIN	Cystatin-B OS=Bos taurus GN=CST6 PE=4 SV=1
	sp|A6QLG5|RS9_BOVIN	40S ribosomal protein S9 OS=Bos taurus GN=RPS9 PE=2 SV=1
	sp|A6QQ85|UPK3L_BOVIN	Uroplakin-3b-like protein OS=Bos taurus GN=UPK3BL PE=2 SV=2
	sp|P00442|SODC_BOVIN	Superoxide dismutase [Cu-Zn] OS=Bos taurus GN=SOD1 PE=1 SV=2
	sp|P79136|CAPZB_BOVIN	F-actin-capping protein subunit beta OS=Bos taurus GN=CAPZB PE=1 SV=1
	sp|Q3T054|RAN_BOVIN	GTP-binding nuclear protein Ran OS=Bos taurus GN=RAN PE=2 SV=3
	sp|P61286|PABP1_BOVIN	Polyadenylate-binding protein 1 OS=Bos taurus GN=PABPC1 PE=2 SV=1
	sp|Q28107|FA5_BOVIN	Coagulation factor V OS=Bos taurus GN=F5 PE=1 SV=1
	tr|A7MB83|A7MB83_BOVIN	PLOD2 protein OS=Bos taurus GN=PLOD2 PE=2 SV=1
	sp|Q1JPB0|ILEU_BOVIN	Leukocyte elastase inhibitor OS=Bos taurus GN=SERPINB1 PE=2 SV=2
	sp|A7E3Q8|PLST_BOVIN	Plastin-3 OS=Bos taurus GN=PLS3 PE=2 SV=1
	tr|E1BKS1|E1BKS1_BOVIN	Syndecan OS=Bos taurus GN=SDC4 PE=3 SV=1
	sp|P63243|GBLP_BOVIN	Guanine nucleotide-binding protein subunit beta-2-like 1 OS=Bos taurus GN=GNB2L1 PE=2 SV=3
	sp|Q5E988|RS5_BOVIN	40S ribosomal protein S5 OS=Bos taurus GN=RPS5 PE=2 SV=3
	tr|A4FUC8|A4FUC8_BOVIN	CARS protein OS=Bos taurus GN=CARS PE=2 SV=1
	tr|A5D9H5|A5D9H5_BOVIN	Heterogeneous nuclear ribonucleoprotein D OS=Bos taurus GN=HNRPD PE=2 SV=1
	sp|Q29465|SYYC_BOVIN	Tyrosine--tRNA ligase, cytoplasmic OS=Bos taurus GN=YARS PE=2 SV=4
	sp|P01035|CYTC_BOVIN	Cystatin-C OS=Bos taurus GN=CST3 PE=1 SV=2
	sp|Q3T0V4|RS11_BOVIN	40S ribosomal protein S11 OS=Bos taurus GN=RPS11 PE=2 SV=3
	tr|E1B864|E1B864_BOVIN	Integrin beta OS=Bos taurus GN=ITGB4 PE=3 SV=2
	tr|A1A4Q6|A1A4Q6_BOVIN	Peptidase inhibitor 3, skin-derived (SKALP) OS=Bos taurus GN=PI3 PE=2 SV=1
	sp|P68250|1433B_BOVIN	14-3-3 protein beta/alpha OS=Bos taurus GN=YWHAB PE=1 SV=2
	sp|P81948|TBA4A_BOVIN	Tubulin alpha-4A chain OS=Bos taurus GN=TUBA4A PE=1 SV=2
	sp|Q2KIW9|KCY_BOVIN	UMP-CMP kinase OS=Bos taurus GN=CMPK1 PE=2 SV=2
	sp|Q58DU5|PSA3_BOVIN	Proteasome subunit alpha type-3 OS=Bos taurus GN=PSMA3 PE=1 SV=3
	sp|Q5E9R3|EHD1_BOVIN	EH domain-containing protein 1 OS=Bos taurus GN=EHD1 PE=1 SV=1
	sp|Q3SYW6|EIF3C_BOVIN	Eukaryotic translation initiation factor 3 subunit C OS=Bos taurus GN=EIF3C PE=2 SV=1
	sp|Q9BGI2|PRDX4_BOVIN	Peroxiredoxin-4 OS=Bos taurus GN=PRDX4 PE=2 SV=1
	sp|Q58DW2|CGL_BOVIN	Cystathionine gamma-lyase OS=Bos taurus GN=CTH PE=2 SV=1
	sp|P53620|COPG1_BOVIN	Coatomer subunit gamma-1 OS=Bos taurus GN=COPG1 PE=1 SV=1
	sp|P68103|EF1A1_BOVIN	Elongation factor 1-alpha 1 OS=Bos taurus GN=EEF1A1 PE=2 SV=1
	tr|A7MBA2|A7MBA2_BOVIN	PSMD1 protein OS=Bos taurus GN=PSMD1 PE=2 SV=1
	sp|Q08E20|ESTD_BOVIN	S-formylglutathione hydrolase OS=Bos taurus GN=ESD PE=2 SV=1
	tr|F1MWQ2|F1MWQ2_BOVIN	Annexin OS=Bos taurus GN=ANXA3 PE=3 SV=1
	sp|P10881|LA_BOVIN	Lupus La protein homolog OS=Bos taurus GN=SSB PE=2 SV=2
	sp|P33672|PSB3_BOVIN	Proteasome subunit beta type-3 OS=Bos taurus GN=PSMB3 PE=1 SV=3
	tr|A6H7E3|A6H7E3_BOVIN	PDZ and LIM domain 1 OS=Bos taurus GN=PDLIM1 PE=2 SV=1
	tr|A7E3S8|A7E3S8_BOVIN	Heat shock 70kD protein binding protein OS=Bos taurus GN=ST13 PE=2 SV=1
	sp|P79345|NPC2_BOVIN	Epididymal secretory protein E1 OS=Bos taurus GN=NPC2 PE=1 SV=1
	sp|Q3T0X6|RS16_BOVIN	40S ribosomal protein S16 OS=Bos taurus GN=RPS16 PE=2 SV=3
	sp|P56541|DNS2A_BOVIN	Deoxyribonuclease-2-alpha OS=Bos taurus GN=DNASE2 PE=2 SV=2
	sp|A5D989|EF1D_BOVIN	Elongation factor 1-delta OS=Bos taurus GN=EEF1D PE=2 SV=2
	sp|P53619|COPD_BOVIN	Coatomer subunit delta OS=Bos taurus GN=ARCN1 PE=1 SV=1
	sp|P60712|ACTB_BOVIN	Actin, cytoplasmic 1 OS=Bos taurus GN=ACTB PE=1 SV=1
	sp|Q3MHY1|CSRP1_BOVIN	Cysteine and glycine-rich protein 1 OS=Bos taurus GN=CSRP1 PE=2 SV=3
	sp|Q3SYU9|MVP_BOVIN	Major vault protein OS=Bos taurus GN=MVP PE=2 SV=1
	sp|P67808|YBOX1_BOVIN	Nuclease-sensitive element-binding protein 1 OS=Bos taurus GN=YBX1 PE=2 SV=3
	sp|Q2TA49|VASP_BOVIN	Vasodilator-stimulated phosphoprotein OS=Bos taurus GN=VASP PE=2 SV=3
	sp|A6H769|RS7_BOVIN	40S ribosomal protein S7 OS=Bos taurus GN=RPS7 PE=2 SV=1
	tr|F1MZV1|F1MZV1_BOVIN	Hexokinase-1 OS=Bos taurus GN=HK1 PE=2 SV=2
	tr|Q3ZC44|Q3ZC44_BOVIN	Heterogeneous nuclear ribonucleoprotein A/B OS=Bos taurus GN=HNRNPAB PE=2 SV=1
	sp|A3KN12|PUR8_BOVIN	Adenylosuccinate lyase OS=Bos taurus GN=ADSL PE=2 SV=1
	sp|P56965|DDAH1_BOVIN	N(G),N(G)-dimethylarginine dimethylaminohydrolase 1 OS=Bos taurus GN=DDAH1 PE=1 SV=3
	sp|Q2KJ93|CDC42_BOVIN	Cell division control protein 42 homolog OS=Bos taurus GN=CDC42 PE=1 SV=1
	sp|Q2KJD0|TBB5_BOVIN	Tubulin beta-5 chain OS=Bos taurus GN=TUBB5 PE=2 SV=1
	sp|Q2KJH6|SERPH_BOVIN	Serpin H1 OS=Bos taurus GN=SERPINH1 PE=2 SV=1
	sp|Q5E9D5|DEST_BOVIN	Destrin OS=Bos taurus GN=DSTN PE=2 SV=3
	sp|Q76I81|RS12_BOVIN	40S ribosomal protein S12 OS=Bos taurus GN=RPS12 PE=2 SV=1
	tr|Q17QI3|Q17QI3_BOVIN	Acetyl-Coenzyme A acetyltransferase 2 OS=Bos taurus GN=ACAT2 PE=2 SV=1
	sp|A7YW98|SYRC_BOVIN	Arginine--tRNA ligase, cytoplasmic OS=Bos taurus GN=RARS PE=2 SV=1
	tr|F1MLV1|F1MLV1_BOVIN	26S protease regulatory subunit 10B OS=Bos taurus GN=PSMC6 PE=4 SV=2
	sp|Q5KR49|TPM1_BOVIN	Tropomyosin alpha-1 chain OS=Bos taurus GN=TPM1 PE=2 SV=1
	sp|Q08DA1|AT1A1_BOVIN	Sodium/potassium-transporting ATPase subunit alpha-1 OS=Bos taurus GN=ATP1A1 PE=2 SV=1
	sp|A6QR11|NELL2_BOVIN	Protein kinase C-binding protein NELL2 OS=Bos taurus GN=NELL2 PE=2 SV=1
	sp|Q2HJH1|DNPEP_BOVIN	Aspartyl aminopeptidase OS=Bos taurus GN=DNPEP PE=1 SV=1
	sp|Q3T087|RL11_BOVIN	60S ribosomal protein L11 OS=Bos taurus GN=RPL11 PE=2 SV=3
	tr|A2VE92|A2VE92_BOVIN	CD55 protein OS=Bos taurus GN=CD55 PE=2 SV=1
	tr|Q0VCZ4|Q0VCZ4_BOVIN	Kallikrein-related peptidase 10 OS=Bos taurus GN=KLK10 PE=2 SV=1
	sp|A5D7R1|TR11B_BOVIN	Tumor necrosis factor receptor superfamily member 11B OS=Bos taurus GN=TNFRSF11B PE=2 SV=1
	sp|Q3T0Q6|CNBP_BOVIN	Cellular nucleic acid-binding protein OS=Bos taurus GN=CNBP PE=2 SV=1
	sp|Q5E9A3|PCBP1_BOVIN	Poly(rC)-binding protein 1 OS=Bos taurus GN=PCBP1 PE=2 SV=1
	sp|Q8WML4|MUC1_BOVIN	Mucin-1 OS=Bos taurus GN=MUC1 PE=1 SV=1
	tr|F1N3P2|F1N3P2_BOVIN	Ubiquitin carboxyl-terminal hydrolase OS=Bos taurus GN=USP5 PE=3 SV=2
	sp|A1A4K3|DDB1_BOVIN	DNA damage-binding protein 1 OS=Bos taurus GN=DDB1 PE=2 SV=1
	sp|P21856|GDIA_BOVIN	Rab GDP dissociation inhibitor alpha OS=Bos taurus GN=GDI1 PE=1 SV=1
	tr|Q1RMX7|Q1RMX7_BOVIN	N-acetylneuraminic acid synthase OS=Bos taurus GN=NANS PE=2 SV=1
	sp|Q0VCY7|SRSF1_BOVIN	Serine/arginine-rich splicing factor 1 OS=Bos taurus GN=SRSF1 PE=2 SV=1
	sp|Q29423|CD44_BOVIN	CD44 antigen OS=Bos taurus GN=CD44 PE=2 SV=1
	tr|H7BWW2|H7BWW2_BOVIN	Beta-hexosaminidase OS=Bos taurus GN=HEXB PE=3 SV=1
	sp|A7MB16|EIF3B_BOVIN	Eukaryotic translation initiation factor 3 subunit B OS=Bos taurus GN=EIF3B PE=2 SV=1
	sp|P51176|TGM2_BOVIN	Protein-glutamine gamma-glutamyltransferase 2 OS=Bos taurus GN=TGM2 PE=1 SV=1
	sp|Q5E9K0|PSB2_BOVIN	Proteasome subunit beta type-2 OS=Bos taurus GN=PSMB2 PE=1 SV=1
	tr|F1N647|F1N647_BOVIN	Fatty acid synthase OS=Bos taurus GN=FASN PE=4 SV=2
	tr|Q3ZBX5|Q3ZBX5_BOVIN	Small inducible cytokine subfamily E, member 1 (Endothelial monocyte-activating) OS=Bos taurus GN=SCYE1 PE=2 SV=2
	sp|Q3T0F4|RS10_BOVIN	40S ribosomal protein S10 OS=Bos taurus GN=RPS10 PE=2 SV=1
	sp|P02768|ALBU_HUMAN	Serum albumin OS=Homo sapiens GN=ALB PE=1 SV=2
	sp|A5PJN2|ERO1A_BOVIN	ERO1-like protein alpha OS=Bos taurus GN=ERO1L PE=2 SV=1
	sp|F1MMS9|ITA3_BOVIN	Integrin alpha-3 OS=Bos taurus GN=ITGA3 PE=3 SV=1
	sp|Q3T0A3|CFAD_BOVIN	Complement factor D OS=Bos taurus GN=CFD PE=2 SV=1
	sp|Q3ZCK3|BPNT1_BOVIN	3'(2'),5'-bisphosphate nucleotidase 1 OS=Bos taurus GN=BPNT1 PE=2 SV=1
	sp|Q3ZCK9|PSA4_BOVIN	Proteasome subunit alpha type-4 OS=Bos taurus GN=PSMA4 PE=1 SV=1
	sp|Q5E983|EF1B_BOVIN	Elongation factor 1-beta OS=Bos taurus GN=EEF1B PE=2 SV=3
	tr|Q56JY8|Q56JY8_BOVIN	Btf3 protein OS=Bos taurus GN=BTF3 PE=2 SV=1
	sp|Q27956|LIF_BOVIN	Leukemia inhibitory factor OS=Bos taurus GN=LIF PE=2 SV=1
	sp|Q865V6|CAPG_BOVIN	Macrophage-capping protein OS=Bos taurus GN=CAPG PE=2 SV=1
	sp|Q9TTK8|KCRU_BOVIN	Creatine kinase U-type, mitochondrial OS=Bos taurus GN=CKMT1 PE=2 SV=1
	sp|Q9XT56|JAM1_BOVIN	Junctional adhesion molecule A OS=Bos taurus GN=F11R PE=2 SV=1
	sp|Q05588|UPAR_BOVIN	Urokinase plasminogen activator surface receptor OS=Bos taurus GN=PLAUR PE=2 SV=1
	sp|P81134|RENR_BOVIN	Renin receptor OS=Bos taurus GN=ATP6AP2 PE=1 SV=2
	sp|Q5E987|PSA5_BOVIN	Proteasome subunit alpha type-5 OS=Bos taurus GN=PSMA5 PE=1 SV=1
	tr|A7Z014|A7Z014_BOVIN	Transketolase OS=Bos taurus GN=TKT PE=2 SV=1
	tr|Q1RMR9|Q1RMR9_BOVIN	Protein kinase C and casein kinase substrate in neurons 2 OS=Bos taurus GN=PACSIN2 PE=2 SV=1
	tr|F1MV90|F1MV90_BOVIN	Uncharacterized protein OS=Bos taurus GN=LOC101906472 PE=3 SV=2
	sp|P35605|COPB2_BOVIN	Coatomer subunit beta' OS=Bos taurus GN=COPB2 PE=1 SV=3
	sp|Q32LG3|MDHM_BOVIN	Malate dehydrogenase, mitochondrial OS=Bos taurus GN=MDH2 PE=1 SV=1
	sp|Q3T030|PRS6B_BOVIN	26S protease regulatory subunit 6B OS=Bos taurus GN=PSMC4 PE=2 SV=1
	sp|Q5E9F9|PRS7_BOVIN	26S protease regulatory subunit 7 OS=Bos taurus GN=PSMC2 PE=2 SV=3
	sp|A0JN39|COPB_BOVIN	Coatomer subunit beta OS=Bos taurus GN=COPB1 PE=1 SV=1
	sp|Q08DP0|PGM1_BOVIN	Phosphoglucomutase-1 OS=Bos taurus GN=PGM1 PE=2 SV=1
	sp|Q2HJG5|VPS35_BOVIN	Vacuolar protein sorting-associated protein 35 OS=Bos taurus GN=VPS35 PE=2 SV=1
	sp|A6QQ07|BTD_BOVIN	Biotinidase OS=Bos taurus GN=BTD PE=2 SV=1
	sp|P62248|CS010_BOVIN	UPF0556 protein C19orf10 homolog OS=Bos taurus PE=2 SV=1
	sp|Q32KL2|PSB5_BOVIN	Proteasome subunit beta type-5 OS=Bos taurus GN=PSMB5 PE=1 SV=1
	sp|Q5E9A1|NACA_BOVIN	Nascent polypeptide-associated complex subunit alpha OS=Bos taurus GN=NACA PE=1 SV=1
	tr|Q3T0Y1|Q3T0Y1_BOVIN	OTU domain, ubiquitin aldehyde binding 1 OS=Bos taurus GN=OTUB1 PE=2 SV=1
	sp|Q2YDE9|TES_BOVIN	Testin OS=Bos taurus GN=TES PE=2 SV=1
	tr|F1MTI7|F1MTI7_BOVIN	Protein CutA OS=Bos taurus GN=CUTA PE=2 SV=1
	sp|P15691|VEGFA_BOVIN	Vascular endothelial growth factor A OS=Bos taurus GN=VEGFA PE=1 SV=1
	sp|A5PKI3|FAM3C_BOVIN	Protein FAM3C OS=Bos taurus GN=FAM3C PE=2 SV=1
	sp|Q3MHM5|TBB4B_BOVIN	Tubulin beta-4B chain OS=Bos taurus GN=TUBB4B PE=2 SV=1
	sp|Q8WMY2|FPPS_BOVIN	Farnesyl pyrophosphate synthase OS=Bos taurus GN=FDPS PE=1 SV=1
	tr|F1MD66|F1MD66_BOVIN	Annexin OS=Bos taurus GN=ANXA11 PE=2 SV=2
	sp|P02510|CRYAB_BOVIN	Alpha-crystallin B chain OS=Bos taurus GN=CRYAB PE=1 SV=2
	sp|Q27971|CAN2_BOVIN	Calpain-2 catalytic subunit OS=Bos taurus GN=CAPN2 PE=2 SV=2
	sp|P23196|APEX1_BOVIN	DNA-(apurinic or apyrimidinic site) lyase OS=Bos taurus GN=APEX1 PE=1 SV=2
	sp|P61356|RL27_BOVIN	60S ribosomal protein L27 OS=Bos taurus GN=RPL27 PE=2 SV=2
	sp|Q5KR47|TPM3_BOVIN	Tropomyosin alpha-3 chain OS=Bos taurus GN=TPM3 PE=2 SV=1
	sp|Q56JU9|RS24_BOVIN	40S ribosomal protein S24 OS=Bos taurus GN=RPS24 PE=2 SV=2
	sp|Q05717|IBP5_BOVIN	Insulin-like growth factor-binding protein 5 OS=Bos taurus GN=IGFBP5 PE=2 SV=2
	sp|Q3ZCH0|GRP75_BOVIN	Stress-70 protein, mitochondrial OS=Bos taurus GN=HSPA9 PE=2 SV=1
	sp|Q58D84|FSTL1_BOVIN	Follistatin-related protein 1 OS=Bos taurus GN=FSTL1 PE=2 SV=1
	sp|P00515|KAP2_BOVIN	cAMP-dependent protein kinase type II-alpha regulatory subunit OS=Bos taurus GN=PRKAR2A PE=1 SV=2
	sp|P62998|RAC1_BOVIN	Ras-related C3 botulinum toxin substrate 1 OS=Bos taurus GN=RAC1 PE=1 SV=1
	sp|Q3MHN0|PSB6_BOVIN	Proteasome subunit beta type-6 OS=Bos taurus GN=PSMB6 PE=1 SV=1
	sp|Q3SX44|DDAH2_BOVIN	N(G),N(G)-dimethylarginine dimethylaminohydrolase 2 OS=Bos taurus GN=DDAH2 PE=2 SV=1
	sp|Q3T147|DX39B_BOVIN	Spliceosome RNA helicase DDX39B OS=Bos taurus GN=DDX39B PE=2 SV=1
	sp|Q5E9E6|RL10A_BOVIN	60S ribosomal protein L10a OS=Bos taurus GN=RPL10A PE=2 SV=3
	tr|F1ML12|F1ML12_BOVIN	Glutaredoxin-3 OS=Bos taurus GN=GLRX3 PE=4 SV=2
	tr|Q2KJ23|Q2KJ23_BOVIN	Bridging integrator 1 OS=Bos taurus GN=BIN1 PE=2 SV=1
	tr|Q2HJ26|Q2HJ26_BOVIN	Phosphoribosylaminoimidazole carboxylase, phosphoribosylaminoimidazole succinocarboxamide synthetase OS=Bos taurus GN=PAICS PE=2 SV=1
	tr|Q3T0G3|Q3T0G3_BOVIN	AHA1, activator of heat shock 90kDa protein ATPase homolog 1 (Yeast) OS=Bos taurus GN=AHSA1 PE=2 SV=1
	sp|Q56K10|RS15_BOVIN	40S ribosomal protein S15 OS=Bos taurus GN=RPS15 PE=2 SV=3
	sp|Q58CQ2|ARC1B_BOVIN	Actin-related protein 2/3 complex subunit 1B OS=Bos taurus GN=ARPC1B PE=1 SV=4
	sp|Q2KI42|PSD11_BOVIN	26S proteasome non-ATPase regulatory subunit 11 OS=Bos taurus GN=PSMD11 PE=2 SV=3
	sp|A7YY28|ABHEB_BOVIN	Alpha/beta hydrolase domain-containing protein 14B OS=Bos taurus GN=ABHD14B PE=2 SV=1
	tr|Q0IIH5|Q0IIH5_BOVIN	Nucleobindin 2 OS=Bos taurus GN=NUCB2 PE=2 SV=1
	tr|F1N7X3|F1N7X3_BOVIN	Nucleosome assembly protein 1-like 4 OS=Bos taurus GN=NAP1L4 PE=3 SV=1
	sp|P68102|IF2A_BOVIN	Eukaryotic translation initiation factor 2 subunit 1 OS=Bos taurus GN=EIF2S1 PE=2 SV=2
	sp|Q56JX5|RS25_BOVIN	40S ribosomal protein S25 OS=Bos taurus GN=RPS25 PE=2 SV=1
	sp|P08037|B4GT1_BOVIN	Beta-1,4-galactosyltransferase 1 OS=Bos taurus GN=B4GALT1 PE=1 SV=3
	sp|P41541|USO1_BOVIN	General vesicular transport factor p115 OS=Bos taurus GN=USO1 PE=1 SV=1
	sp|P42899|RLA2_BOVIN	60S acidic ribosomal protein P2 OS=Bos taurus GN=RPLP2 PE=3 SV=1
	sp|P12344|AATM_BOVIN	Aspartate aminotransferase, mitochondrial OS=Bos taurus GN=GOT2 PE=1 SV=2
	sp|Q9MZ06|FGFP1_BOVIN	Fibroblast growth factor-binding protein 1 OS=Bos taurus GN=FGFBP1 PE=1 SV=1
	sp|Q9GLE5|MMP2_BOVIN	72 kDa type IV collagenase OS=Bos taurus GN=MMP2 PE=2 SV=1
	sp|P60902|S10AA_BOVIN	Protein S100-A10 OS=Bos taurus GN=S100A10 PE=1 SV=2
	sp|O97764|QOR_BOVIN	Zeta-crystallin OS=Bos taurus GN=CRYZ PE=2 SV=2
	tr|F1N0S5|F1N0S5_BOVIN	Cadherin-2 OS=Bos taurus GN=CDH2 PE=2 SV=2
	tr|F1N619|F1N619_BOVIN	Cadherin-1 (Fragment) OS=Bos taurus GN=CDH1 PE=2 SV=2
	sp|Q5E954|DNJA1_BOVIN	DnaJ homolog subfamily A member 1 OS=Bos taurus GN=DNAJA1 PE=2 SV=2
	tr|A4FUZ3|A4FUZ3_BOVIN	Proteasome (Prosome, macropain) 26S subunit, ATPase, 1 OS=Bos taurus GN=PSMC1 PE=2 SV=1
	tr|Q0VC51|Q0VC51_BOVIN	Interleukin 1 receptor accessory protein OS=Bos taurus GN=IL1RAP PE=2 SV=1
	sp|P13384|IBP2_BOVIN	Insulin-like growth factor-binding protein 2 OS=Bos taurus GN=IGFBP2 PE=1 SV=2
	sp|Q9XSK7|HDGF_BOVIN	Hepatoma-derived growth factor OS=Bos taurus GN=HDGF PE=2 SV=1
	tr|D3JUI8|D3JUI8_BOVIN	RNA-binding motif protein, X chromosome OS=Bos taurus GN=RBMX PE=2 SV=1
	sp|O02751|CFDP2_BOVIN	Craniofacial development protein 2 OS=Bos taurus GN=CFDP2 PE=1 SV=2
	sp|Q2KHU0|SERB_BOVIN	Phosphoserine phosphatase OS=Bos taurus GN=PSPH PE=2 SV=1
	sp|Q2KIY5|PLBL2_BOVIN	Putative phospholipase B-like 2 OS=Bos taurus GN=PLBD2 PE=2 SV=1
	sp|Q0IIH7|ST14_BOVIN	Suppressor of tumorigenicity 14 protein homolog OS=Bos taurus GN=ST14 PE=2 SV=1
	tr|F1MLW0|F1MLW0_BOVIN	Non-muscle caldesmon OS=Bos taurus GN=CALD1 PE=4 SV=2
	sp|A4FUA8|CAZA1_BOVIN	F-actin-capping protein subunit alpha-1 OS=Bos taurus GN=CAPZA1 PE=2 SV=1
	sp|P01252|PTMA_BOVIN	Prothymosin alpha OS=Bos taurus GN=PTMA PE=1 SV=2
	sp|Q3T108|PSB4_BOVIN	Proteasome subunit beta type-4 OS=Bos taurus GN=PSMB4 PE=1 SV=1
	sp|Q0VFX8|CRIP2_BOVIN	Cysteine-rich protein 2 OS=Bos taurus GN=CRIP2 PE=2 SV=1
	tr|A5D7P3|A5D7P3_BOVIN	Platelet-activating factor acetylhydrolase IB subunit alpha OS=Bos taurus GN=PAFAH1B1 PE=2 SV=1
	sp|Q3ZBF7|TEBP_BOVIN	Prostaglandin E synthase 3 OS=Bos taurus GN=PTGES3 PE=1 SV=1
	tr|F1MBI1|F1MBI1_BOVIN	Proteasome subunit beta type OS=Bos taurus GN=PSMB7 PE=3 SV=2
	sp|P67774|PP2AA_BOVIN	Serine/threonine-protein phosphatase 2A catalytic subunit alpha isoform OS=Bos taurus GN=PPP2CA PE=1 SV=1
	tr|F1N2A2|F1N2A2_BOVIN	Serpin B6 OS=Bos taurus GN=SERPINB6 PE=3 SV=2
	sp|Q32LC7|G3BP1_BOVIN	Ras GTPase-activating protein-binding protein 1 OS=Bos taurus GN=G3BP PE=2 SV=1
	tr|A2VDN8|A2VDN8_BOVIN	Coronin OS=Bos taurus GN=CORO1C PE=2 SV=1
	sp|A7MBJ4|PTPRF_BOVIN	Receptor-type tyrosine-protein phosphatase F OS=Bos taurus GN=PTPRF PE=2 SV=1
	sp|P61585|RHOA_BOVIN	Transforming protein RhoA OS=Bos taurus GN=RHOA PE=1 SV=1
	sp|Q07130|UGPA_BOVIN	UTP--glucose-1-phosphate uridylyltransferase OS=Bos taurus GN=UGP2 PE=1 SV=2
	sp|Q1JP79|ARC1A_BOVIN	Actin-related protein 2/3 complex subunit 1A OS=Bos taurus GN=ARPC1A PE=2 SV=1
	sp|Q3MHR7|ARPC2_BOVIN	Actin-related protein 2/3 complex subunit 2 OS=Bos taurus GN=ARPC2 PE=1 SV=1
	sp|Q3ZBD9|MARE1_BOVIN	Microtubule-associated protein RP/EB family member 1 OS=Bos taurus GN=MAPRE1 PE=2 SV=3
	sp|Q3ZBH8|RS20_BOVIN	40S ribosomal protein S20 OS=Bos taurus GN=RPS20 PE=3 SV=1
	sp|P62958|HINT1_BOVIN	Histidine triad nucleotide-binding protein 1 OS=Bos taurus GN=HINT1 PE=1 SV=2
	sp|P68401|PA1B2_BOVIN	Platelet-activating factor acetylhydrolase IB subunit beta OS=Bos taurus GN=PAFAH1B2 PE=1 SV=1
	sp|Q56K14|RLA1_BOVIN	60S acidic ribosomal protein P1 OS=Bos taurus GN=RPLP1 PE=3 SV=1
	sp|P81623|ERP29_BOVIN	Endoplasmic reticulum resident protein 29 OS=Bos taurus GN=ERP29 PE=1 SV=2
	sp|Q3ZBW4|PCNA_BOVIN	Proliferating cell nuclear antigen OS=Bos taurus GN=PCNA PE=2 SV=1
	tr|Q3MHK9|Q3MHK9_BOVIN	Fascin OS=Bos taurus GN=FSCN1 PE=2 SV=1
	tr|E1BBP4|E1BBP4_BOVIN	Tyrosine-protein kinase receptor OS=Bos taurus GN=DDR1 PE=2 SV=2
	sp|Q3MHR5|SRSF2_BOVIN	Serine/arginine-rich splicing factor 2 OS=Bos taurus GN=SRSF2 PE=2 SV=3
	sp|Q1LZB9|FSTL3_BOVIN	Follistatin-related protein 3 OS=Bos taurus GN=FSTL3 PE=2 SV=1
	sp|Q3SZJ4|PTGR1_BOVIN	Prostaglandin reductase 1 OS=Bos taurus GN=PTGR1 PE=2 SV=1
	sp|A7E3W2|LG3BP_BOVIN	Galectin-3-binding protein OS=Bos taurus GN=LGALS3BP PE=1 SV=1
	sp|O77783|EXT2_BOVIN	Exostosin-2 OS=Bos taurus GN=EXT2 PE=1 SV=1
	sp|Q7YQE1|GCNT3_BOVIN	Beta-1,3-galactosyl-O-glycosyl-glycoprotein beta-1,6-N-acetylglucosaminyltransferase 3 OS=Bos taurus GN=GCNT3 PE=1 SV=1
	sp|Q148J6|ARPC4_BOVIN	Actin-related protein 2/3 complex subunit 4 OS=Bos taurus GN=ARPC4 PE=1 SV=3
	sp|P02313|HMGN2_BOVIN	Non-histone chromosomal protein HMG-17 OS=Bos taurus GN=HMGN2 PE=1 SV=2
	sp|A5PK65|DOPD_BOVIN	D-dopachrome decarboxylase OS=Bos taurus GN=DDT PE=3 SV=1
	sp|Q2KI84|SYHC_BOVIN	Histidine--tRNA ligase, cytoplasmic OS=Bos taurus GN=HARS PE=2 SV=1
	sp|A5PK63|RS17_BOVIN	40S ribosomal protein S17 OS=Bos taurus GN=RPS17 PE=2 SV=1
	sp|Q3SZC6|AN32B_BOVIN	Acidic leucine-rich nuclear phosphoprotein 32 family member B OS=Bos taurus GN=ANP32B PE=2 SV=1
	sp|Q3ZBD0|PSMD7_BOVIN	26S proteasome non-ATPase regulatory subunit 7 OS=Bos taurus GN=PSMD7 PE=2 SV=1
	sp|Q56JW4|APT_BOVIN	Adenine phosphoribosyltransferase OS=Bos taurus GN=APRT PE=2 SV=1
	sp|Q28104|COPE_BOVIN	Coatomer subunit epsilon OS=Bos taurus GN=COPE PE=1 SV=3
	sp|Q29460|PA1B3_BOVIN	Platelet-activating factor acetylhydrolase IB subunit gamma OS=Bos taurus GN=PAFAH1B3 PE=1 SV=1
	sp|Q3ZC13|AP2M1_BOVIN	AP-2 complex subunit mu OS=Bos taurus GN=AP2M1 PE=1 SV=1
	sp|A7YW45|ANM5_BOVIN	Protein arginine N-methyltransferase 5 OS=Bos taurus GN=PRMT5 PE=2 SV=1
	sp|Q8WN55|PTBP1_BOVIN	Polypyrimidine tract-binding protein 1 OS=Bos taurus GN=PTBP1 PE=2 SV=1
	sp|Q1JPJ8|THOP1_BOVIN	Thimet oligopeptidase OS=Bos taurus GN=THOP1 PE=2 SV=3
	sp|P02754|LACB_BOVIN	Beta-lactoglobulin OS=Bos taurus GN=LGB PE=1 SV=3
	sp|Q8SPJ1|PLAK_BOVIN	Junction plakoglobin OS=Bos taurus GN=JUP PE=2 SV=1
	sp|Q24K02|IDE_BOVIN	Insulin-degrading enzyme OS=Bos taurus GN=IDE PE=2 SV=1
	tr|A7MB07|A7MB07_BOVIN	ADAMTS1 protein OS=Bos taurus GN=ADAMTS1 PE=2 SV=1
	sp|Q0IIF7|UBP14_BOVIN	Ubiquitin carboxyl-terminal hydrolase 14 OS=Bos taurus GN=USP14 PE=2 SV=3
	sp|Q58DA0|PSMD4_BOVIN	26S proteasome non-ATPase regulatory subunit 4 OS=Bos taurus GN=PSMD4 PE=2 SV=1
	sp|P62871|GBB1_BOVIN	Guanine nucleotide-binding protein G(I)/G(S)/G(T) subunit beta-1 OS=Bos taurus GN=GNB1 PE=1 SV=3
	sp|P63009|AP2B1_BOVIN	AP-2 complex subunit beta OS=Bos taurus GN=AP2B1 PE=1 SV=2
	sp|Q29RL2|CHRD1_BOVIN	Cysteine and histidine-rich domain-containing protein 1 OS=Bos taurus GN=CHORDC1 PE=2 SV=1
	sp|P62979|RS27A_HUMAN	Ubiquitin-40S ribosomal protein S27a OS=Homo sapiens GN=RPS27A PE=1 SV=2
	sp|A2VE14|SAE1_BOVIN	SUMO-activating enzyme subunit 1 OS=Bos taurus GN=SAE1 PE=2 SV=1
	sp|Q3T0M7|RANG_BOVIN	Ran-specific GTPase-activating protein OS=Bos taurus GN=RANBP1 PE=2 SV=1
	tr|G8JL06|G8JL06_BOVIN	Histone H2B OS=Bos taurus GN=HIST1H2BB PE=3 SV=1
	sp|Q3T0D5|RL30_BOVIN	60S ribosomal protein L30 OS=Bos taurus GN=RPL30 PE=3 SV=3
	sp|P40673|HMGB2_BOVIN	High mobility group protein B2 OS=Bos taurus GN=HMGB2 PE=1 SV=3
	tr|A4FV23|A4FV23_BOVIN	DDX21 protein OS=Bos taurus GN=DDX21 PE=2 SV=1
	tr|F6Q087|F6Q087_BOVIN	G1 to S phase transition 1 OS=Bos taurus GN=GSPT1 PE=4 SV=1
	sp|P08166|KAD2_BOVIN	Adenylate kinase 2, mitochondrial OS=Bos taurus GN=AK2 PE=1 SV=2
	sp|P09487|PPBT_BOVIN	Alkaline phosphatase, tissue-nonspecific isozyme OS=Bos taurus GN=ALPL PE=1 SV=2
	sp|Q2KI95|FHL2_BOVIN	Four and a half LIM domains protein 2 OS=Bos taurus GN=FHL2 PE=2 SV=1
	tr|A1L528|A1L528_BOVIN	RAB1A, member RAS oncogene family OS=Bos taurus GN=RAB1A PE=2 SV=1
	tr|F1N3V0|F1N3V0_BOVIN	Malic enzyme OS=Bos taurus GN=ME1 PE=3 SV=2
	sp|A5D7A0|EFHD2_BOVIN	EF-hand domain-containing protein D2 OS=Bos taurus GN=EFHD2 PE=2 SV=1
	sp|Q3SZC4|NSF1C_BOVIN	NSFL1 cofactor p47 OS=Bos taurus GN=NSFL1C PE=2 SV=1
	sp|A6H767|NP1L1_BOVIN	Nucleosome assembly protein 1-like 1 OS=Bos taurus GN=NAP1L1 PE=2 SV=1
	sp|Q3T057|RL23_BOVIN	60S ribosomal protein L23 OS=Bos taurus GN=RPL23 PE=2 SV=2
	sp|Q27966|MYO1C_BOVIN	Unconventional myosin-Ic OS=Bos taurus GN=MYO1C PE=1 SV=3
	sp|P31754|UMPS_BOVIN	Uridine 5'-monophosphate synthase OS=Bos taurus GN=UMPS PE=2 SV=1
	sp|Q56JZ5|EIF3H_BOVIN	Eukaryotic translation initiation factor 3 subunit H OS=Bos taurus GN=EIF3H PE=2 SV=1
	sp|P13135|CPNS1_BOVIN	Calpain small subunit 1 OS=Bos taurus GN=CAPNS1 PE=2 SV=1
	sp|P02638|S100B_BOVIN	Protein S100-B OS=Bos taurus GN=S100B PE=1 SV=2
	sp|Q5E966|EIF3I_BOVIN	Eukaryotic translation initiation factor 3 subunit I OS=Bos taurus GN=EIF3I PE=2 SV=1
	sp|Q3T0B2|PSMD6_BOVIN	26S proteasome non-ATPase regulatory subunit 6 OS=Bos taurus GN=PSMD6 PE=2 SV=1
	sp|Q1JPH6|IF4H_BOVIN	Eukaryotic translation initiation factor 4H OS=Bos taurus GN=EIF4H PE=2 SV=1
	sp|Q3SZ57|FETA_BOVIN	Alpha-fetoprotein OS=Bos taurus GN=AFP PE=2 SV=1
	tr|F1MU08|F1MU08_BOVIN	Poly [ADP-ribose] polymerase 1 OS=Bos taurus GN=PARP1 PE=4 SV=2
	sp|Q28046|ADSV_BOVIN	Adseverin OS=Bos taurus GN=SCIN PE=1 SV=1
	tr|A3KMY8|A3KMY8_BOVIN	GUSB protein OS=Bos taurus GN=GUSB PE=2 SV=1
	sp|P05689|CATZ_BOVIN	Cathepsin Z OS=Bos taurus GN=CTSZ PE=2 SV=2
	sp|P38573|UPK1B_BOVIN	Uroplakin-1b OS=Bos taurus GN=UPK1B PE=1 SV=4
	sp|A5D7I4|EXT1_BOVIN	Exostosin-1 OS=Bos taurus GN=EXT1 PE=2 SV=1
	sp|Q3SZ18|HPRT_BOVIN	Hypoxanthine-guanine phosphoribosyltransferase OS=Bos taurus GN=HPRT1 PE=2 SV=3
	tr|Q3ZBY4|Q3ZBY4_BOVIN	Fructose-bisphosphate aldolase OS=Bos taurus GN=ALDOC PE=2 SV=2
	tr|F1MJQ1|F1MJQ1_BOVIN	Ras-related protein Rab-7a OS=Bos taurus GN=RAB7A PE=3 SV=1
	sp|Q2HJ86|TBA1D_BOVIN	Tubulin alpha-1D chain OS=Bos taurus GN=TUBA1D PE=1 SV=1
	sp|Q2TBG8|UCHL3_BOVIN	Ubiquitin carboxyl-terminal hydrolase isozyme L3 OS=Bos taurus GN=UCHL3 PE=2 SV=1
	sp|Q58DW3|RL29_BOVIN	60S ribosomal protein L29 OS=Bos taurus GN=RPL29 PE=2 SV=3
	sp|P84080|ARF1_BOVIN	ADP-ribosylation factor 1 OS=Bos taurus GN=ARF1 PE=1 SV=2
	sp|Q56JV6|TWF1_BOVIN	Twinfilin-1 OS=Bos taurus GN=TWF1 PE=2 SV=1
	sp|Q3SZ65|IF4A2_BOVIN	Eukaryotic initiation factor 4A-II OS=Bos taurus GN=EIF4A2 PE=2 SV=1
	sp|P02316|HMGN1_BOVIN	Non-histone chromosomal protein HMG-14 OS=Bos taurus GN=HMGN1 PE=1 SV=2
	sp|P61285|DYL1_BOVIN	Dynein light chain 1, cytoplasmic OS=Bos taurus GN=DYNLL1 PE=1 SV=1
	sp|Q5E959|STRAP_BOVIN	Serine-threonine kinase receptor-associated protein OS=Bos taurus GN=STRAP PE=2 SV=1
	sp|P62157|CALM_BOVIN	Calmodulin OS=Bos taurus GN=CALM PE=1 SV=2
	sp|P34933|HSP72_BOVIN	Heat shock-related 70 kDa protein 2 OS=Bos taurus GN=HSPA2 PE=2 SV=2
	sp|Q5E964|PSD13_BOVIN	26S proteasome non-ATPase regulatory subunit 13 OS=Bos taurus GN=PSMD13 PE=2 SV=1
	sp|Q5E9J1|HNRPF_BOVIN	Heterogeneous nuclear ribonucleoprotein F OS=Bos taurus GN=HNRNPF PE=2 SV=3
	sp|Q3SYU6|CNN2_BOVIN	Calponin-2 OS=Bos taurus GN=CNN2 PE=2 SV=3
	tr|A6QLR1|A6QLR1_BOVIN	Poliovirus receptor-related 4 OS=Bos taurus GN=PVRL4 PE=2 SV=1
	sp|Q08E38|PRP19_BOVIN	Pre-mRNA-processing factor 19 OS=Bos taurus GN=PRPF19 PE=2 SV=1
	sp|Q17QB3|ASAH1_BOVIN	Acid ceramidase OS=Bos taurus GN=ASAH1 PE=2 SV=3
	tr|Q3SYV6|Q3SYV6_BOVIN	Importin subunit alpha OS=Bos taurus GN=KPNA2 PE=2 SV=1
	sp|Q32L50|SBSPO_BOVIN	Somatomedin-B and thrombospondin type-1 domain-containing protein OS=Bos taurus GN=SBSPON PE=2 SV=2
	tr|F1N1G1|F1N1G1_BOVIN	Heparanase OS=Bos taurus GN=HPSE PE=4 SV=2
	sp|Q58DK5|HEM2_BOVIN	Delta-aminolevulinic acid dehydratase OS=Bos taurus GN=ALAD PE=2 SV=1
	sp|Q3MHP3|S10AE_BOVIN	Protein S100-A14 OS=Bos taurus GN=S100A14 PE=3 SV=1
	tr|F1MJ56|F1MJ56_BOVIN	Unconventional myosin-Id OS=Bos taurus GN=MYO1D PE=4 SV=1
	sp|Q29RK4|RD23B_BOVIN	UV excision repair protein RAD23 homolog B OS=Bos taurus GN=RAD23B PE=2 SV=1
	tr|A7MBH9|A7MBH9_BOVIN	GNAI2 protein OS=Bos taurus GN=GNAI2 PE=2 SV=1
	tr|E1BN47|E1BN47_BOVIN	Cytoplasmic FMR1-interacting protein 1 OS=Bos taurus GN=CYFIP1 PE=4 SV=2
	sp|P31404|VATA_BOVIN	V-type proton ATPase catalytic subunit A OS=Bos taurus GN=ATP6V1A PE=2 SV=2
	sp|Q27968|DNJC3_BOVIN	DnaJ homolog subfamily C member 3 OS=Bos taurus GN=DNAJC3 PE=1 SV=1
	tr|Q2KIT8|Q2KIT8_BOVIN	Tissue specific transplantation antigen P35B OS=Bos taurus GN=TSTA3 PE=2 SV=1
	sp|Q32L92|CNN3_BOVIN	Calponin-3 OS=Bos taurus GN=CNN3 PE=2 SV=1
	tr|A5PJT7|A5PJT7_BOVIN	ECM1 protein OS=Bos taurus GN=ECM1 PE=2 SV=1
	tr|Q58DP6|Q58DP6_BOVIN	Ribonuclease 4 OS=Bos taurus GN=RNASE4 PE=2 SV=1
	sp|Q3ZC64|EFNA1_BOVIN	Ephrin-A1 OS=Bos taurus GN=EFNA1 PE=2 SV=1
	tr|A6H7D7|A6H7D7_BOVIN	BZW2 protein OS=Bos taurus GN=BZW2 PE=2 SV=1
	sp|Q5E9F8|H33_BOVIN	Histone H3.3 OS=Bos taurus GN=H3F3A PE=1 SV=3
	sp|P62803|H4_BOVIN	Histone H4 OS=Bos taurus PE=1 SV=2
	sp|Q9TS87|TAGL_BOVIN	Transgelin OS=Bos taurus GN=TAGLN PE=1 SV=4
	tr|Q0III8|Q0III8_BOVIN	RNASET2 protein (Fragment) OS=Bos taurus GN=RNASET2 PE=2 SV=1
	sp|P00829|ATPB_BOVIN	ATP synthase subunit beta, mitochondrial OS=Bos taurus GN=ATP5B PE=1 SV=2
	tr|A6QL85|A6QL85_BOVIN	RCC2 protein OS=Bos taurus GN=RCC2 PE=2 SV=1
	sp|E1BNQ4|NNRD_BOVIN	ATP-dependent (S)-NAD(P)H-hydrate dehydratase OS=Bos taurus GN=CARKD PE=3 SV=1
	sp|Q1LZH9|GNS_BOVIN	N-acetylglucosamine-6-sulfatase OS=Bos taurus GN=GNS PE=2 SV=1
	sp|Q29451|MA2B1_BOVIN	Lysosomal alpha-mannosidase OS=Bos taurus GN=MAN2B1 PE=1 SV=4
	tr|A6QP36|A6QP36_BOVIN	LMAN2 protein OS=Bos taurus GN=LMAN2 PE=2 SV=1
	tr|Q3SYT9|Q3SYT9_BOVIN	Poly(RC) binding protein 2 OS=Bos taurus GN=PCBP2 PE=2 SV=1
	sp|P61955|SUMO2_BOVIN	Small ubiquitin-related modifier 2 OS=Bos taurus GN=SUMO2 PE=3 SV=1
	sp|Q2KJ25|PSD12_BOVIN	26S proteasome non-ATPase regulatory subunit 12 OS=Bos taurus GN=PSMD12 PE=2 SV=3
	sp|P0C1G6|SWP70_BOVIN	Switch-associated protein 70 OS=Bos taurus GN=SWAP70 PE=1 SV=1
	sp|Q0IIK5|DDX1_BOVIN	ATP-dependent RNA helicase DDX1 OS=Bos taurus GN=DDX1 PE=2 SV=1
	sp|Q32PA4|PHP14_BOVIN	14 kDa phosphohistidine phosphatase OS=Bos taurus GN=PHPT1 PE=2 SV=1
	sp|Q3SZJ0|ARLY_BOVIN	Argininosuccinate lyase OS=Bos taurus GN=ASL PE=2 SV=1
	sp|Q0VCX4|CTNB1_BOVIN	Catenin beta-1 OS=Bos taurus GN=CTNNB1 PE=1 SV=1
	tr|G5E630|G5E630_BOVIN	Ubiquitin carboxyl-terminal hydrolase OS=Bos taurus GN=USP9X PE=3 SV=1
	tr|F1N4W4|F1N4W4_BOVIN	Membrane cofactor protein OS=Bos taurus GN=CD46 PE=2 SV=2
	tr|Q17QC7|Q17QC7_BOVIN	Poliovirus receptor-related 2 (Herpesvirus entry mediator B) OS=Bos taurus GN=PVRL2 PE=2 SV=1
	tr|Q3SX47|Q3SX47_BOVIN	Heterogeneous nuclear ribonucleoprotein C (C1/C2) OS=Bos taurus GN=HNRPC PE=2 SV=1
	sp|Q3SWZ6|SBDS_BOVIN	Ribosome maturation protein SBDS OS=Bos taurus GN=SBDS PE=2 SV=1
	tr|A6QL81|A6QL81_BOVIN	DKK3 protein OS=Bos taurus GN=DKK3 PE=2 SV=1
	sp|P62285|ASPM_BOVIN	Abnormal spindle-like microcephaly-associated protein homolog (Fragment) OS=Bos taurus GN=ASPM PE=2 SV=1
	tr|F1MF86|F1MF86_BOVIN	Latent-transforming growth factor beta-binding protein 2 OS=Bos taurus GN=LTBP2 PE=4 SV=1
	sp|Q2KIM0|FUCO_BOVIN	Tissue alpha-L-fucosidase OS=Bos taurus GN=FUCA1 PE=2 SV=1
	tr|A5D7L1|A5D7L1_BOVIN	CLEC11A protein OS=Bos taurus GN=CLEC11A PE=2 SV=1
	sp|O62768|TRXR1_BOVIN	Thioredoxin reductase 1, cytoplasmic OS=Bos taurus GN=TXNRD1 PE=2 SV=3
	sp|Q3MHP1|UB2L3_BOVIN	Ubiquitin-conjugating enzyme E2 L3 OS=Bos taurus GN=UBE2L3 PE=2 SV=1
	tr|Q3T076|Q3T076_BOVIN	Ribosomal protein S14 OS=Bos taurus GN=RPS14 PE=2 SV=1
	sp|Q58DS9|RAB5C_BOVIN	Ras-related protein Rab-5C OS=Bos taurus GN=RAB5C PE=2 SV=1
	sp|Q3SWX8|RBBP7_BOVIN	Histone-binding protein RBBP7 OS=Bos taurus GN=RBBP7 PE=2 SV=1
	sp|Q27970|CAN1_BOVIN	Calpain-1 catalytic subunit OS=Bos taurus GN=CAPN1 PE=1 SV=3
	sp|Q5BIR5|SPB8_BOVIN	Serpin B8 OS=Bos taurus GN=SERPINB8 PE=2 SV=1
	tr|A5PJY9|A5PJY9_BOVIN	CPNE3 protein OS=Bos taurus GN=CPNE3 PE=2 SV=1
	sp|Q8MJ50|OSTF1_BOVIN	Osteoclast-stimulating factor 1 OS=Bos taurus GN=OSTF1 PE=2 SV=1
	tr|F1MC11|F1MC11_BOVIN	Keratin, type I cytoskeletal 14 OS=Bos taurus GN=KRT14 PE=3 SV=2
	sp|Q76I82|RS15A_BOVIN	40S ribosomal protein S15a OS=Bos taurus GN=RPS15A PE=2 SV=1
	tr|F1MIF2|F1MIF2_BOVIN	Uncharacterized protein OS=Bos taurus GN=AP1B1 PE=4 SV=1
	tr|Q0V7N2|Q0V7N2_BOVIN	Complement C2 OS=Bos taurus GN=C2 PE=2 SV=1
	sp|Q1LZB6|CAPR1_BOVIN	Caprin-1 OS=Bos taurus GN=CAPRIN1 PE=2 SV=1
	sp|Q3B7L6|SRSF6_BOVIN	Serine/arginine-rich splicing factor 6 OS=Bos taurus GN=SRSF6 PE=2 SV=1
	sp|Q3T0I4|THOC4_BOVIN	THO complex subunit 4 OS=Bos taurus GN=ALYREF PE=2 SV=1
	sp|Q3T106|SRSF7_BOVIN	Serine/arginine-rich splicing factor 7 OS=Bos taurus GN=SRSF7 PE=2 SV=1
	sp|P79105|S10AC_BOVIN	Protein S100-A12 OS=Bos taurus GN=S100A12 PE=1 SV=3
	sp|Q29RT9|CXL16_BOVIN	C-X-C motif chemokine 16 OS=Bos taurus GN=CXCL16 PE=2 SV=1
	sp|Q2KIT5|CREL2_BOVIN	Cysteine-rich with EGF-like domain protein 2 OS=Bos taurus GN=CRELD2 PE=2 SV=1
	sp|Q3T0C8|PDLI2_BOVIN	PDZ and LIM domain protein 2 OS=Bos taurus GN=PDLIM2 PE=2 SV=1
	tr|A4IFS7|A4IFS7_BOVIN	CTSL1 protein OS=Bos taurus GN=CTSL1 PE=2 SV=1
	sp|P11017|GBB2_BOVIN	Guanine nucleotide-binding protein G(I)/G(S)/G(T) subunit beta-2 OS=Bos taurus GN=GNB2 PE=2 SV=3
	sp|A2VE99|SEP11_BOVIN	Septin-11 OS=Bos taurus GN=SEPT11 PE=2 SV=1
	sp|Q3T0T1|PSB10_BOVIN	Proteasome subunit beta type-10 OS=Bos taurus GN=PSMB10 PE=1 SV=1
	tr|Q17QP9|Q17QP9_BOVIN	Proteasome (Prosome, macropain) 26S subunit, non-ATPase, 14 OS=Bos taurus GN=PSMD14 PE=2 SV=1
	sp|Q0VCP4|SEPT8_BOVIN	Septin-8 OS=Bos taurus GN=SEPT8 PE=2 SV=3
	tr|Q148D3|Q148D3_BOVIN	Fumarate hydratase OS=Bos taurus GN=FH PE=2 SV=1
	sp|P11116|LEG1_BOVIN	Galectin-1 OS=Bos taurus GN=LGALS1 PE=1 SV=2
	sp|Q2T9S4|PGP_BOVIN	Phosphoglycolate phosphatase OS=Bos taurus GN=PGP PE=2 SV=1
	sp|Q3SZN2|SC23B_BOVIN	Protein transport protein Sec23B OS=Bos taurus GN=SEC23B PE=2 SV=1
	tr|G1K122|G1K122_BOVIN	Retinol-binding protein 4 OS=Bos taurus GN=RBP4 PE=2 SV=1
	sp|P15246|PIMT_BOVIN	Protein-L-isoaspartate(D-aspartate) O-methyltransferase OS=Bos taurus GN=PCMT1 PE=1 SV=2
	sp|P37980|IPYR_BOVIN	Inorganic pyrophosphatase OS=Bos taurus GN=PPA1 PE=1 SV=2
	sp|Q3T0W4|PP1R7_BOVIN	Protein phosphatase 1 regulatory subunit 7 OS=Bos taurus GN=PPP1R7 PE=1 SV=1
	sp|Q58D08|P5CR3_BOVIN	Pyrroline-5-carboxylate reductase 3 OS=Bos taurus GN=PYCRL PE=2 SV=1
	sp|Q0P5K3|UBE2N_BOVIN	Ubiquitin-conjugating enzyme E2 N OS=Bos taurus GN=UBE2N PE=2 SV=1
	sp|Q3ZCL8|SH3L3_BOVIN	SH3 domain-binding glutamic acid-rich-like protein 3 OS=Bos taurus GN=SH3BGRL3 PE=3 SV=1
	sp|Q5EAD2|SERA_BOVIN	D-3-phosphoglycerate dehydrogenase OS=Bos taurus GN=PHGDH PE=2 SV=3
	sp|Q5XQN5|K2C5_BOVIN	Keratin, type II cytoskeletal 5 OS=Bos taurus GN=KRT5 PE=1 SV=1
	sp|Q9TU47|IF6_BOVIN	Eukaryotic translation initiation factor 6 OS=Bos taurus GN=EIF6 PE=2 SV=2
	sp|P23356|UCHL1_BOVIN	Ubiquitin carboxyl-terminal hydrolase isozyme L1 OS=Bos taurus GN=UCHL1 PE=1 SV=2
	sp|Q2T9P4|NASP_BOVIN	Nuclear autoantigenic sperm protein OS=Bos taurus GN=NASP PE=2 SV=2
	tr|B5UBG1|B5UBG1_BOVIN	Calcitonin OS=Bos taurus GN=CT PE=2 SV=1
	tr|F1MMR6|F1MMR6_BOVIN	Cathepsin D OS=Bos taurus GN=CTSD PE=2 SV=1
	sp|P61603|CH10_BOVIN	10 kDa heat shock protein, mitochondrial OS=Bos taurus GN=HSPE1 PE=3 SV=2
	sp|P30931|TF_BOVIN	Tissue factor OS=Bos taurus GN=F3 PE=1 SV=1
	sp|Q5EA01|B3GN1_BOVIN	N-acetyllactosaminide beta-1,3-N-acetylglucosaminyltransferase OS=Bos taurus GN=B3GNT1 PE=2 SV=2
	sp|Q3T0B6|C1QBP_BOVIN	Complement component 1 Q subcomponent-binding protein, mitochondrial OS=Bos taurus GN=C1QBP PE=2 SV=1
	tr|A4FV12|A4FV12_BOVIN	UBA2 protein OS=Bos taurus GN=UBA2 PE=2 SV=1
	sp|O19131|TNR1A_BOVIN	Tumor necrosis factor receptor superfamily member 1A OS=Bos taurus GN=TNFRSF1A PE=2 SV=1
	sp|Q3T0Z8|RUXF_BOVIN	Small nuclear ribonucleoprotein F OS=Bos taurus GN=SNRPF PE=3 SV=2
	sp|Q5EA79|GALM_BOVIN	Aldose 1-epimerase OS=Bos taurus GN=GALM PE=2 SV=1
	sp|A0JN52|SF3B3_BOVIN	Splicing factor 3B subunit 3 OS=Bos taurus GN=SF3B3 PE=2 SV=1
	sp|P40682|VAS1_BOVIN	V-type proton ATPase subunit S1 OS=Bos taurus GN=ATP6AP1 PE=1 SV=1
	tr|Q3T0U5|Q3T0U5_BOVIN	Chromatin modifying protein 2A OS=Bos taurus GN=CHMP2A PE=2 SV=1
	REVERSE_tr|E1BQ37|E1BQ37_BOVIN-R	Uncharacterized protein OS=Bos taurus GN=SFPQ PE=4 SV=1
	sp|Q0V8B6|TPP1_BOVIN	Tripeptidyl-peptidase 1 OS=Bos taurus GN=TPP1 PE=2 SV=1
	sp|Q58D55|BGAL_BOVIN	Beta-galactosidase OS=Bos taurus GN=GLB1 PE=2 SV=1
	sp|Q95M12|LGMN_BOVIN	Legumain OS=Bos taurus GN=LGMN PE=1 SV=1
	tr|A1L570|A1L570_BOVIN	Ephrin-B1 OS=Bos taurus GN=EFNB1 PE=2 SV=1
	tr|A6QLB7|A6QLB7_BOVIN	Adenylyl cyclase-associated protein OS=Bos taurus GN=CAP1 PE=2 SV=1
	sp|Q3ZC07|ACTC_BOVIN	Actin, alpha cardiac muscle 1 OS=Bos taurus GN=ACTC1 PE=2 SV=1
	sp|Q2HJH2|RAB1B_BOVIN	Ras-related protein Rab-1B OS=Bos taurus GN=RAB1B PE=2 SV=1
	sp|A4IF97|ML12B_BOVIN	Myosin regulatory light chain 12B OS=Bos taurus GN=MYL12B PE=2 SV=1
	sp|P26884|FKBP3_BOVIN	Peptidyl-prolyl cis-trans isomerase FKBP3 OS=Bos taurus GN=FKBP3 PE=1 SV=2
	sp|Q29S11|NUCKS_BOVIN	Nuclear ubiquitous casein and cyclin-dependent kinase substrate 1 OS=Bos taurus GN=NUCKS1 PE=2 SV=1
	tr|A4FUZ1|A4FUZ1_BOVIN	GLO1 protein OS=Bos taurus GN=GLO1 PE=2 SV=1
	sp|Q3MIC0|RL37A_BOVIN	60S ribosomal protein L37a OS=Bos taurus GN=RPL37A PE=3 SV=3
	tr|F1MSZ6|F1MSZ6_BOVIN	Antithrombin-III OS=Bos taurus GN=SERPINC1 PE=3 SV=1
	sp|Q5E997|CAZA2_BOVIN	F-actin-capping protein subunit alpha-2 OS=Bos taurus GN=CAPZA2 PE=1 SV=3
	sp|Q2HJ47|DENR_BOVIN	Density-regulated protein OS=Bos taurus GN=DENR PE=2 SV=1
	sp|P79135|MX1_BOVIN	Interferon-induced GTP-binding protein Mx1 OS=Bos taurus GN=MX1 PE=2 SV=4
	sp|A6H7B5|CSN3_BOVIN	COP9 signalosome complex subunit 3 OS=Bos taurus GN=COPS3 PE=2 SV=1
	sp|Q32PB9|RL38_BOVIN	60S ribosomal protein L38 OS=Bos taurus GN=RPL38 PE=3 SV=4
	sp|Q3ZCH9|HDHD2_BOVIN	Haloacid dehalogenase-like hydrolase domain-containing protein 2 OS=Bos taurus GN=HDHD2 PE=2 SV=1
	sp|P80227|ACPH_BOVIN	Acylamino-acid-releasing enzyme OS=Bos taurus GN=APEH PE=1 SV=2
	sp|Q2HJ74|GATM_BOVIN	Glycine amidinotransferase, mitochondrial OS=Bos taurus GN=GATM PE=2 SV=1
	tr|A7MB21|A7MB21_BOVIN	FERMT2 protein OS=Bos taurus GN=FERMT2 PE=2 SV=1
	sp|P80177|MIF_BOVIN	Macrophage migration inhibitory factor OS=Bos taurus GN=MIF PE=1 SV=6
	sp|Q1JQB5|FBLI1_BOVIN	Filamin-binding LIM protein 1 OS=Bos taurus GN=FBLIM1 PE=2 SV=1
	sp|Q95323|CAH4_BOVIN	Carbonic anhydrase 4 OS=Bos taurus GN=CA4 PE=2 SV=1
	sp|A1A4K5|ENPP2_BOVIN	Ectonucleotide pyrophosphatase/phosphodiesterase family member 2 OS=Bos taurus GN=ENPP2 PE=1 SV=1
	tr|A7Z025|A7Z025_BOVIN	PRPF8 protein OS=Bos taurus GN=PRPF8 PE=2 SV=1
	sp|Q3ZBG9|PLS2_BOVIN	Phospholipid scramblase 2 OS=Bos taurus GN=PLSCR2 PE=2 SV=1
	sp|P79134|ANXA6_BOVIN	Annexin A6 OS=Bos taurus GN=ANXA6 PE=1 SV=2
	tr|A6QM01|A6QM01_BOVIN	NAGLU protein OS=Bos taurus GN=NAGLU PE=2 SV=1
	sp|P14769|GGTA1_BOVIN	N-acetyllactosaminide alpha-1,3-galactosyltransferase OS=Bos taurus GN=GGTA1 PE=1 SV=1
	sp|Q05716|IBP4_BOVIN	Insulin-like growth factor-binding protein 4 OS=Bos taurus GN=IGFBP4 PE=2 SV=1
	sp|Q3SWX5|CADH6_BOVIN	Cadherin-6 OS=Bos taurus GN=CDH6 PE=2 SV=1
	sp|P06868|PLMN_BOVIN	Plasminogen OS=Bos taurus GN=PLG PE=1 SV=2
	sp|Q2NL29|INO1_BOVIN	Inositol-3-phosphate synthase 1 OS=Bos taurus GN=ISYNA1 PE=2 SV=1
	sp|Q5EAC2|GSHB_BOVIN	Glutathione synthetase OS=Bos taurus GN=GSS PE=2 SV=1
	tr|Q08E32|Q08E32_BOVIN	CHMP4B protein OS=Bos taurus GN=CHMP4B PE=2 SV=2
	sp|Q09430|PROF2_BOVIN	Profilin-2 OS=Bos taurus GN=PFN2 PE=1 SV=2
	tr|A7YWC6|A7YWC6_BOVIN	SUB1 protein OS=Bos taurus GN=SUB1 PE=2 SV=1
	sp|P52556|BLVRB_BOVIN	Flavin reductase (NADPH) OS=Bos taurus GN=BLVRB PE=1 SV=2
	sp|Q3ZBV1|IST1_BOVIN	IST1 homolog OS=Bos taurus GN=IST1 PE=2 SV=1
	sp|P04896|GNAS2_BOVIN	Guanine nucleotide-binding protein G(s) subunit alpha isoforms short OS=Bos taurus GN=GNAS PE=1 SV=1
	sp|P00432|CATA_BOVIN	Catalase OS=Bos taurus GN=CAT PE=1 SV=3
	sp|P53710|ITA2_BOVIN	Integrin alpha-2 (Fragment) OS=Bos taurus GN=ITGA2 PE=2 SV=1
	tr|A5PKL2|A5PKL2_BOVIN	RRAS2 protein OS=Bos taurus GN=RRAS2 PE=2 SV=1
	tr|F1N3A1|F1N3A1_BOVIN	Thrombospondin-1 OS=Bos taurus GN=THBS1 PE=4 SV=1
	tr|F1N206|F1N206_BOVIN	Dihydrolipoyl dehydrogenase OS=Bos taurus GN=DLD PE=3 SV=2
	tr|Q3ZBX0|Q3ZBX0_BOVIN	Basigin OS=Bos taurus GN=BSG PE=2 SV=1
	sp|P27674|GTR1_BOVIN	Solute carrier family 2, facilitated glucose transporter member 1 OS=Bos taurus GN=SLC2A1 PE=2 SV=1
	sp|Q17QN3|RSMN_BOVIN	Small nuclear ribonucleoprotein-associated protein N OS=Bos taurus GN=SNRPN PE=2 SV=1
	tr|Q1RMT6|Q1RMT6_BOVIN	Drebrin 1 OS=Bos taurus GN=DBN1 PE=2 SV=1
	sp|Q3ZC10|SMD1_BOVIN	Small nuclear ribonucleoprotein Sm D1 OS=Bos taurus GN=SNRPD1 PE=3 SV=1
	sp|Q58CS8|GNPTG_BOVIN	N-acetylglucosamine-1-phosphotransferase subunit gamma OS=Bos taurus GN=GNPTG PE=1 SV=4
	tr|A0JN47|A0JN47_BOVIN	Plexin domain containing 2 OS=Bos taurus GN=PLXDC2 PE=2 SV=1
	tr|A2VDR3|A2VDR3_BOVIN	Cerebellin 4 OS=Bos taurus GN=CBLN4 PE=2 SV=1
	sp|Q1RMR2|RU17_BOVIN	U1 small nuclear ribonucleoprotein 70 kDa OS=Bos taurus GN=SNRNP70 PE=2 SV=1
	tr|Q2TBX1|Q2TBX1_BOVIN	Cytokine induced protein 29 kDa OS=Bos taurus GN=CIP29 PE=2 SV=1
	tr|Q3T010|Q3T010_BOVIN	Phosphatidylethanolamine-binding protein 4 OS=Bos taurus GN=PEBP4 PE=2 SV=1
	REVERSE_tr|Q0VC27|Q0VC27_BOVIN-R	High mobility group AT-hook 1 OS=Bos taurus GN=HMGA1 PE=2 SV=1
	sp|P10731|AMD_BOVIN	Peptidyl-glycine alpha-amidating monooxygenase OS=Bos taurus GN=PAM PE=1 SV=2
	sp|P79255|IL8_BOVIN	Interleukin-8 OS=Bos taurus GN=IL8 PE=3 SV=1
	tr|Q3ZCM0|Q3ZCM0_BOVIN	Lymphocyte-specific protein tyrosine kinase OS=Bos taurus GN=LCK PE=2 SV=1
	tr|A5D7J6|A5D7J6_BOVIN	CALR protein OS=Bos taurus GN=CALR PE=2 SV=1
	tr|F1MNF8|F1MNF8_BOVIN	Uncharacterized protein OS=Bos taurus GN=LOC100141266 PE=2 SV=1
	sp|A2VDK6|WASF2_BOVIN	Wiskott-Aldrich syndrome protein family member 2 OS=Bos taurus GN=WASF2 PE=2 SV=1
	tr|E1B726|E1B726_BOVIN	Plasminogen OS=Bos taurus GN=PLG PE=2 SV=2
	tr|A6QLS9|A6QLS9_BOVIN	RAB10 protein OS=Bos taurus GN=RAB10 PE=2 SV=1
	sp|P05786|K2C8_BOVIN	Keratin, type II cytoskeletal 8 OS=Bos taurus GN=KRT8 PE=2 SV=3
	tr|E1BKD0|E1BKD0_BOVIN	Ribosomal protein OS=Bos taurus PE=3 SV=2
	tr|A7MBD4|A7MBD4_BOVIN	FARSA protein OS=Bos taurus GN=FARSA PE=2 SV=1
	sp|P46195|KGUA_BOVIN	Guanylate kinase OS=Bos taurus GN=GUK1 PE=1 SV=2
	sp|Q5EAD0|BAIP2_BOVIN	Brain-specific angiogenesis inhibitor 1-associated protein 2 OS=Bos taurus GN=BAIAP2 PE=2 SV=1
	sp|Q9N0T5|IF4E_BOVIN	Eukaryotic translation initiation factor 4E OS=Bos taurus GN=EIF4E PE=2 SV=2
	tr|Q32LC3|Q32LC3_BOVIN	Eukaryotic translation initiation factor 1A, X-linked OS=Bos taurus GN=EIF1AX PE=2 SV=1
	sp|P54149|MSRA_BOVIN	Mitochondrial peptide methionine sulfoxide reductase OS=Bos taurus GN=MSRA PE=1 SV=2
	sp|P16116|ALDR_BOVIN	Aldose reductase OS=Bos taurus GN=AKR1B1 PE=1 SV=1
	sp|Q28105|EPCR_BOVIN	Endothelial protein C receptor OS=Bos taurus GN=PROCR PE=2 SV=1
	sp|Q58CQ9|VNN1_BOVIN	Pantetheinase OS=Bos taurus GN=VNN1 PE=2 SV=1
	tr|Q3ZBU0|Q3ZBU0_BOVIN	PDZ and LIM domain 5 OS=Bos taurus GN=PDLIM5 PE=2 SV=1
	tr|Q2NKU1|Q2NKU1_BOVIN	Deoxyuridine triphosphatase OS=Bos taurus GN=DUT PE=2 SV=1
	sp|Q08DM8|TSN_BOVIN	Translin OS=Bos taurus GN=TSN PE=2 SV=1
	sp|Q3SYX0|NDRG1_BOVIN	Protein NDRG1 OS=Bos taurus GN=NDRG1 PE=2 SV=1
	sp|P62894|CYC_BOVIN	Cytochrome c OS=Bos taurus GN=CYCS PE=1 SV=2
	tr|G3N0D8|G3N0D8_BOVIN	Claudin OS=Bos taurus GN=CLDN6 PE=3 SV=1
	tr|F1MAU3|F1MAU3_BOVIN	Gamma-interferon-inducible lysosomal thiol reductase OS=Bos taurus GN=IFI30 PE=4 SV=2
	tr|F1MZF2|F1MZF2_BOVIN	Desmocollin-2 OS=Bos taurus GN=DSC2 PE=3 SV=2
	sp|Q3SZF8|SMD2_BOVIN	Small nuclear ribonucleoprotein Sm D2 OS=Bos taurus GN=SNRPD2 PE=3 SV=1
	sp|Q3ZC55|ACTN2_BOVIN	Alpha-actinin-2 OS=Bos taurus GN=ACTN2 PE=2 SV=1
	tr|F6QZF5|F6QZF5_BOVIN	Granzyme A OS=Bos taurus GN=GZMA PE=4 SV=1
	sp|P00732|CBPB1_BOVIN	Carboxypeptidase B OS=Bos taurus GN=CPB1 PE=1 SV=2
	sp|P10152|ANG1_BOVIN	Angiogenin-1 OS=Bos taurus GN=ANG1 PE=1 SV=4
	sp|Q29444|MANBA_BOVIN	Beta-mannosidase OS=Bos taurus GN=MANBA PE=1 SV=1
	sp|Q3SYV4|CAP1_BOVIN	Adenylyl cyclase-associated protein 1 OS=Bos taurus GN=CAP1 PE=2 SV=3
	sp|Q3ZBV4|HMGN3_BOVIN	High mobility group nucleosome-binding domain-containing protein 3 OS=Bos taurus GN=HMGN3 PE=2 SV=1
	sp|Q3T0U2|RL14_BOVIN	60S ribosomal protein L14 OS=Bos taurus GN=RPL14 PE=2 SV=3
	tr|F6QVC9|F6QVC9_BOVIN	Annexin OS=Bos taurus GN=ANXA5 PE=2 SV=1
	sp|Q3ZCE8|RBM8A_BOVIN	RNA-binding protein 8A OS=Bos taurus GN=RBM8A PE=2 SV=2
	sp|Q2KII4|ELOC_BOVIN	Transcription elongation factor B polypeptide 1 OS=Bos taurus GN=TCEB1 PE=3 SV=1
	sp|Q1RMJ6|RHOC_BOVIN	Rho-related GTP-binding protein RhoC OS=Bos taurus GN=RHOC PE=2 SV=1
	tr|Q2NKU4|Q2NKU4_BOVIN	Calcium regulated heat stable protein 1, 24kDa OS=Bos taurus GN=CARHSP1 PE=2 SV=1
	sp|Q0VBZ9|MRP_BOVIN	MARCKS-related protein OS=Bos taurus GN=MARCKSL1 PE=2 SV=1
	sp|P35705|PRDX3_BOVIN	Thioredoxin-dependent peroxide reductase, mitochondrial OS=Bos taurus GN=PRDX3 PE=1 SV=2
	REVERSE_sp|Q24K02|IDE_BOVIN-R	Insulin-degrading enzyme OS=Bos taurus GN=IDE PE=2 SV=1
	sp|Q28009|FUS_BOVIN	RNA-binding protein FUS OS=Bos taurus GN=FUS PE=2 SV=2
	sp|P00366|DHE3_BOVIN	Glutamate dehydrogenase 1, mitochondrial OS=Bos taurus GN=GLUD1 PE=1 SV=2
	sp|Q29RK1|CISY_BOVIN	Citrate synthase, mitochondrial OS=Bos taurus GN=CS PE=1 SV=1
	tr|Q3ZCE2|Q3ZCE2_BOVIN	ELAV (Embryonic lethal, abnormal vision, Drosophila)-like 1 (Hu antigen R) OS=Bos taurus GN=ELAVL1 PE=2 SV=1
	sp|Q3T0L5|EPCAM_BOVIN	Epithelial cell adhesion molecule OS=Bos taurus GN=EPCAM PE=2 SV=1
	tr|Q0VD44|Q0VD44_BOVIN	Twisted gastrulation homolog 1 (Drosophila) OS=Bos taurus GN=TWSG1 PE=2 SV=1
	sp|P01096|ATIF1_BOVIN	ATPase inhibitor, mitochondrial OS=Bos taurus GN=ATPIF1 PE=1 SV=2
	sp|Q0X0C4|HEXI1_BOVIN	Protein HEXIM1 OS=Bos taurus GN=HEXIM1 PE=2 SV=1
	sp|Q3ZBL0|RUXG_BOVIN	Small nuclear ribonucleoprotein G OS=Bos taurus GN=SNRPG PE=3 SV=1
	tr|F1N401|F1N401_BOVIN	Collagen alpha-1(XII) chain OS=Bos taurus GN=COL12A1 PE=2 SV=2
	sp|Q28021|ROCK2_BOVIN	Rho-associated protein kinase 2 OS=Bos taurus GN=ROCK2 PE=1 SV=1
	tr|E1BKZ5|E1BKZ5_BOVIN	Uncharacterized protein OS=Bos taurus GN=GOLGB1 PE=2 SV=2
	tr|Q2KJ17|Q2KJ17_BOVIN	GTPase activating protein (SH3 domain) binding protein 2 OS=Bos taurus GN=G3BP2 PE=2 SV=1
	sp|Q56K04|CRIP1_BOVIN	Cysteine-rich protein 1 OS=Bos taurus GN=CRIP1 PE=3 SV=3
	sp|Q0VCG9|PTX3_BOVIN	Pentraxin-related protein PTX3 OS=Bos taurus GN=PTX3 PE=2 SV=1
	sp|Q8WMV3|CXAR_BOVIN	Coxsackievirus and adenovirus receptor homolog OS=Bos taurus GN=CXADR PE=2 SV=1
	tr|F1MD00|F1MD00_BOVIN	Uncharacterized protein (Fragment) OS=Bos taurus GN=FAM214A PE=2 SV=1
	REVERSE_tr|G3MYW8|G3MYW8_BOVIN-R	Uncharacterized protein OS=Bos taurus PE=4 SV=1
	tr|F1MM24|F1MM24_BOVIN	Uncharacterized protein OS=Bos taurus GN=SLC38A4 PE=4 SV=1
	sp|P52193|CALR_BOVIN	Calreticulin OS=Bos taurus GN=CALR PE=1 SV=2
	sp|P52175|NDKA2_BOVIN	Nucleoside diphosphate kinase A 2 OS=Bos taurus GN=NME1-2 PE=1 SV=3
	sp|Q3T0C7|STMN1_BOVIN	Stathmin OS=Bos taurus GN=STMN1 PE=2 SV=3
	sp|Q3SZC2|PSB9_BOVIN	Proteasome subunit beta type-9 OS=Bos taurus GN=PSMB9 PE=1 SV=1
	tr|A7MB57|A7MB57_BOVIN	Uncharacterized protein OS=Bos taurus GN=YES1 PE=2 SV=1
	sp|P60984|GMFB_BOVIN	Glia maturation factor beta OS=Bos taurus GN=GMFB PE=1 SV=2
	sp|Q3SWW9|PP1B_BOVIN	Serine/threonine-protein phosphatase PP1-beta catalytic subunit OS=Bos taurus GN=PPP1CB PE=2 SV=1
	sp|P13753|HA1B_BOVIN	BOLA class I histocompatibility antigen, alpha chain BL3-7 OS=Bos taurus PE=2 SV=1
	tr|A4IFC3|A4IFC3_BOVIN	PABPC4 protein OS=Bos taurus GN=PABPC4 PE=2 SV=1
	sp|Q3ZCE0|LSM8_BOVIN	U6 snRNA-associated Sm-like protein LSm8 OS=Bos taurus GN=LSM8 PE=3 SV=3
	sp|A4FV54|RAB8A_BOVIN	Ras-related protein Rab-8A OS=Bos taurus GN=RAB8A PE=2 SV=1
	sp|A4FV08|GNPI1_BOVIN	Glucosamine-6-phosphate isomerase 1 OS=Bos taurus GN=GNPDA1 PE=2 SV=1
	sp|Q5PXY7|RABP2_BOVIN	Cellular retinoic acid-binding protein 2 OS=Bos taurus GN=CRABP2 PE=2 SV=3
	sp|A4FUI2|RUXE_BOVIN	Small nuclear ribonucleoprotein E OS=Bos taurus GN=SNRPE PE=3 SV=1
	sp|Q08E11|PPIC_BOVIN	Peptidyl-prolyl cis-trans isomerase C OS=Bos taurus GN=PPIC PE=2 SV=1
	sp|Q32KV6|SIL1_BOVIN	Nucleotide exchange factor SIL1 OS=Bos taurus GN=SIL1 PE=2 SV=1
	sp|Q1LZ95|IDI1_BOVIN	Isopentenyl-diphosphate Delta-isomerase 1 OS=Bos taurus GN=IDI1 PE=2 SV=2
	sp|P21782|PTN_BOVIN	Pleiotrophin OS=Bos taurus GN=PTN PE=1 SV=2
	tr|A5D9E9|A5D9E9_BOVIN	Complement component 1, r subcomponent OS=Bos taurus GN=C1R PE=2 SV=1
	sp|Q3T186|RPIA_BOVIN	Ribose-5-phosphate isomerase (Fragment) OS=Bos taurus GN=RPIA PE=2 SV=2
	tr|A6QLZ3|A6QLZ3_BOVIN	ARSB protein OS=Bos taurus GN=ARSB PE=2 SV=1
	sp|Q0VD18|LHPP_BOVIN	Phospholysine phosphohistidine inorganic pyrophosphate phosphatase OS=Bos taurus GN=LHPP PE=1 SV=1
	tr|A7MB18|A7MB18_BOVIN	NTN4 protein OS=Bos taurus GN=NTN4 PE=2 SV=1
	tr|Q24JZ8|Q24JZ8_BOVIN	U2 small nuclear RNA auxiliary factor 2 OS=Bos taurus GN=U2AF2 PE=2 SV=1
	tr|Q32LF7|Q32LF7_BOVIN	UDP-Gal:betaGlcNAc beta 1,4-galactosyltransferase, polypeptide 4 OS=Bos taurus GN=B4GALT4 PE=2 SV=1
	sp|Q2HJG2|PUF60_BOVIN	Poly(U)-binding-splicing factor PUF60 OS=Bos taurus GN=PUF60 PE=2 SV=1
	sp|Q3SYW1|AP1M2_BOVIN	AP-1 complex subunit mu-2 OS=Bos taurus GN=AP1M2 PE=1 SV=3
	sp|Q1ZYR0|CLN5_BOVIN	Ceroid-lipofuscinosis neuronal protein 5 OS=Bos taurus GN=CLN5 PE=2 SV=1
	sp|P79121|TIMP3_BOVIN	Metalloproteinase inhibitor 3 OS=Bos taurus GN=TIMP3 PE=2 SV=1
	sp|Q3MHL3|RBBP4_BOVIN	Histone-binding protein RBBP4 OS=Bos taurus GN=RBBP4 PE=1 SV=3
	sp|Q32PF3|PCNP_BOVIN	PEST proteolytic signal-containing nuclear protein OS=Bos taurus GN=PCNP PE=2 SV=1
	tr|Q1RMW0|Q1RMW0_BOVIN	Phospholipid scramblase 3 OS=Bos taurus GN=PLSCR3 PE=2 SV=1
	sp|Q0VD22|STK33_BOVIN	Serine/threonine-protein kinase 33 OS=Bos taurus GN=STK33 PE=2 SV=1
	sp|P48452|PP2BA_BOVIN	Serine/threonine-protein phosphatase 2B catalytic subunit alpha isoform OS=Bos taurus GN=PPP3CA PE=1 SV=1
	sp|Q0VCA3|LETM1_BOVIN	LETM1 and EF-hand domain-containing protein 1, mitochondrial OS=Bos taurus GN=LETM1 PE=2 SV=1
	sp|P00792|PEPA_BOVIN	Pepsin A OS=Bos taurus GN=PGA PE=1 SV=2
	sp|P80221|CXCL6_BOVIN	C-X-C motif chemokine 6 OS=Bos taurus GN=CXCL6 PE=1 SV=2
	sp|Q28120|QPCT_BOVIN	Glutaminyl-peptide cyclotransferase OS=Bos taurus GN=QPCT PE=1 SV=1
	sp|Q2TBX4|HSP13_BOVIN	Heat shock 70 kDa protein 13 OS=Bos taurus GN=HSPA13 PE=2 SV=1
	sp|Q95122|CD14_BOVIN	Monocyte differentiation antigen CD14 OS=Bos taurus GN=CD14 PE=2 SV=2
	tr|Q3MHI9|Q3MHI9_BOVIN	Tumor necrosis factor receptor superfamily, member 1B OS=Bos taurus GN=TNFRSF1B PE=2 SV=1
	sp|Q5E994|CHM1B_BOVIN	Charged multivesicular body protein 1b OS=Bos taurus GN=CHMP1B PE=2 SV=1
	tr|Q0IIG0|Q0IIG0_BOVIN	Nucleolar and coiled-body phosphoprotein 1 OS=Bos taurus GN=NOLC1 PE=2 SV=1
	REVERSE_sp|Q2KI85|SMTL2_BOVIN-R	Smoothelin-like protein 2 OS=Bos taurus GN=SMTNL2 PE=2 SV=1
	tr|E1BDI4|E1BDI4_BOVIN	Uncharacterized protein OS=Bos taurus GN=FANCI PE=4 SV=2
	REVERSE_tr|E1BLT9|E1BLT9_BOVIN-R	Uncharacterized protein (Fragment) OS=Bos taurus GN=ARMC5 PE=4 SV=2
	tr|F1MNS0|F1MNS0_BOVIN	Uncharacterized protein OS=Bos taurus GN=HERC1 PE=2 SV=2
	tr|F1N161|F1N161_BOVIN	Calpastatin OS=Bos taurus GN=CAST PE=2 SV=2
	sp|Q32KV0|PGAM2_BOVIN	Phosphoglycerate mutase 2 OS=Bos taurus GN=PGAM2 PE=2 SV=1
	sp|Q2HJ81|TBB6_BOVIN	Tubulin beta-6 chain OS=Bos taurus GN=TUBB6 PE=2 SV=1
	tr|Q3ZCA7|Q3ZCA7_BOVIN	Guanine nucleotide binding protein (G protein), alpha inhibiting activity polypeptide 3 OS=Bos taurus GN=GNAI3 PE=2 SV=1
	sp|Q3SZF2|ARF4_BOVIN	ADP-ribosylation factor 4 OS=Bos taurus GN=ARF4 PE=2 SV=3
	sp|Q05B89|GTPC1_BOVIN	Putative GTP cyclohydrolase 1 type 2 NIF3L1 OS=Bos taurus GN=NIF3L1 PE=2 SV=1
	sp|Q0VCM0|S10AG_BOVIN	Protein S100-A16 OS=Bos taurus GN=S100A16 PE=3 SV=1
	sp|P81287|ANXA5_BOVIN	Annexin A5 OS=Bos taurus GN=ANXA5 PE=1 SV=3
	sp|P18203|FKB1A_BOVIN	Peptidyl-prolyl cis-trans isomerase FKBP1A OS=Bos taurus GN=FKBP1A PE=1 SV=2
	tr|Q5E970|Q5E970_BOVIN	DEAD (Asp-Glu-Ala-Asp) box polypeptide 39 isoform 1 OS=Bos taurus GN=DDX39 PE=2 SV=1
	tr|Q2KJ41|Q2KJ41_BOVIN	Tetraspanin 14 OS=Bos taurus GN=TSPAN14 PE=2 SV=1
	sp|A2VDL8|SC23A_BOVIN	Protein transport protein Sec23A OS=Bos taurus GN=SEC23A PE=2 SV=1
	tr|F1MYB8|F1MYB8_BOVIN	von Willebrand factor A domain-containing protein 7 OS=Bos taurus GN=VWA7 PE=4 SV=2
	sp|Q08DD1|ARSA_BOVIN	Arylsulfatase A OS=Bos taurus GN=ARSA PE=2 SV=1
	tr|A2VDM7|A2VDM7_BOVIN	Splicing factor 1 OS=Bos taurus GN=SF1 PE=2 SV=1
	sp|Q0VCU8|EIF3J_BOVIN	Eukaryotic translation initiation factor 3 subunit J OS=Bos taurus GN=EIF3J PE=2 SV=1
	sp|Q3T083|SDF2L_BOVIN	Stromal cell-derived factor 2-like protein 1 OS=Bos taurus GN=SDF2L1 PE=2 SV=1
	sp|Q2YDG0|GPC5C_BOVIN	G-protein coupled receptor family C group 5 member C OS=Bos taurus GN=GPRC5C PE=2 SV=2
	tr|A2VDW0|A2VDW0_BOVIN	Lymphocyte antigen 6 complex, locus G6E OS=Bos taurus GN=LY6G6E PE=2 SV=1
	sp|Q5E9C0|RSU1_BOVIN	Ras suppressor protein 1 OS=Bos taurus GN=RSU1 PE=2 SV=1
	sp|Q0VD48|VPS4B_BOVIN	Vacuolar protein sorting-associated protein 4B OS=Bos taurus GN=VPS4B PE=2 SV=1
	tr|F1N5I0|F1N5I0_BOVIN	Uncharacterized protein (Fragment) OS=Bos taurus GN=LYPD6B PE=4 SV=1
	sp|A5PJN8|SF3A2_BOVIN	Splicing factor 3A subunit 2 OS=Bos taurus GN=SF3A2 PE=2 SV=1
	tr|F1MWH2|F1MWH2_BOVIN	Adenosylhomocysteinase OS=Bos taurus GN=AHCYL1 PE=2 SV=2
	tr|A6QNZ5|A6QNZ5_BOVIN	MGC151537 protein OS=Bos taurus GN=MGC151537 PE=2 SV=1
	sp|Q0P5F3|LIN7C_BOVIN	Protein lin-7 homolog C OS=Bos taurus GN=LIN7C PE=2 SV=1
	tr|F1MD63|F1MD63_BOVIN	Uncharacterized protein (Fragment) OS=Bos taurus GN=DIXDC1 PE=4 SV=1
	sp|Q3ZBL1|MTND_BOVIN	1,2-dihydroxy-3-keto-5-methylthiopentene dioxygenase OS=Bos taurus GN=ADI1 PE=2 SV=2
	sp|A6H7H1|F120A_BOVIN	Constitutive coactivator of PPAR-gamma-like protein 1 OS=Bos taurus GN=FAM120A PE=2 SV=1
	sp|Q05B60|NUD14_BOVIN	Uridine diphosphate glucose pyrophosphatase OS=Bos taurus GN=NUDT14 PE=2 SV=1
	sp|P10790|FABPH_BOVIN	Fatty acid-binding protein, heart OS=Bos taurus GN=FABP3 PE=1 SV=2
	sp|Q3ZBA6|DJB11_BOVIN	DnaJ homolog subfamily B member 11 OS=Bos taurus GN=DNAJB11 PE=2 SV=1
	tr|A5PKK0|A5PKK0_BOVIN	FAM151B protein OS=Bos taurus GN=FAM151B PE=2 SV=1
	sp|P08169|MPRI_BOVIN	Cation-independent mannose-6-phosphate receptor OS=Bos taurus GN=IGF2R PE=1 SV=2
	sp|A5D7H3|CTL2_BOVIN	Choline transporter-like protein 2 OS=Bos taurus GN=SLC44A2 PE=2 SV=1
	sp|A6QLD2|OLM2B_BOVIN	Olfactomedin-like protein 2B OS=Bos taurus GN=OLFML2B PE=2 SV=1
	sp|P21214|TGFB2_BOVIN	Transforming growth factor beta-2 OS=Bos taurus GN=TGFB2 PE=1 SV=3
	sp|Q10741|ADA10_BOVIN	Disintegrin and metalloproteinase domain-containing protein 10 OS=Bos taurus GN=ADAM10 PE=1 SV=1
	tr|E1BPI3|E1BPI3_BOVIN	Uncharacterized protein OS=Bos taurus GN=FRK PE=4 SV=1
	tr|F1MT97|F1MT97_BOVIN	Interstitial collagenase OS=Bos taurus GN=MMP1 PE=4 SV=2
	tr|Q0P5B0|Q0P5B0_BOVIN	Arrestin domain containing 1 OS=Bos taurus GN=ARRDC1 PE=2 SV=1
	tr|F1MYE4|F1MYE4_BOVIN	Chondroadherin OS=Bos taurus GN=CHAD PE=2 SV=2
	tr|Q0VCU3|Q0VCU3_BOVIN	Cathepsin F OS=Bos taurus GN=CTSF PE=2 SV=1
	sp|P10279|PRIO_BOVIN	Major prion protein OS=Bos taurus GN=PRNP PE=1 SV=2
	sp|Q2KIR1|SNRPA_BOVIN	U1 small nuclear ribonucleoprotein A OS=Bos taurus GN=SNRPA PE=2 SV=1
	REVERSE_sp|P10103|HMGB1_BOVIN-R	High mobility group protein B1 OS=Bos taurus GN=HMGB1 PE=1 SV=3
	sp|Q14532|K1H2_HUMAN	Keratin, type I cuticular Ha2 OS=Homo sapiens GN=KRT32 PE=1 SV=3
	tr|F1MHG0|F1MHG0_BOVIN	Uncharacterized protein (Fragment) OS=Bos taurus GN=MYO7A PE=4 SV=2
	tr|E1BMN9|E1BMN9_BOVIN	Uncharacterized protein OS=Bos taurus GN=BSN PE=4 SV=2
	sp|A7MB62|ARP2_BOVIN	Actin-related protein 2 OS=Bos taurus GN=ACTR2 PE=1 SV=1
	tr|F1MU12|F1MU12_BOVIN	Keratin, type II cytoskeletal 8 OS=Bos taurus GN=KRT8 PE=3 SV=1
	sp|P0CB32|HS71L_BOVIN	Heat shock 70 kDa protein 1-like OS=Bos taurus GN=HSPA1L PE=3 SV=1
	sp|Q3T0P5|CASP6_BOVIN	Caspase-6 OS=Bos taurus GN=CASP6 PE=2 SV=1
	sp|P55942|MT1H_BOVIN	Metallothionein-I, hippocampal OS=Bos taurus PE=1 SV=1
	sp|A4IFC4|SH3L2_BOVIN	SH3 domain-binding glutamic acid-rich-like protein 2 OS=Bos taurus GN=SH3BGRL2 PE=3 SV=1
	tr|A6QPZ0|A6QPZ0_BOVIN	CSTB protein OS=Bos taurus GN=CSTB PE=4 SV=1
	sp|P63048|RL40_BOVIN	Ubiquitin-60S ribosomal protein L40 OS=Bos taurus GN=UBA52 PE=1 SV=2
	sp|Q2LGB5|TOLIP_BOVIN	Toll-interacting protein OS=Bos taurus GN=TOLLIP PE=2 SV=1
	sp|Q32PA9|FKBP2_BOVIN	Peptidyl-prolyl cis-trans isomerase FKBP2 OS=Bos taurus GN=FKBP2 PE=2 SV=1
	sp|Q5EAE6|DAP1_BOVIN	Death-associated protein 1 OS=Bos taurus GN=DAP PE=3 SV=3
	sp|P25417|CYTB_BOVIN	Cystatin-B OS=Bos taurus GN=CSTB PE=1 SV=1
	sp|P02081|HBBF_BOVIN	Hemoglobin fetal subunit beta OS=Bos taurus PE=1 SV=1
	tr|F1MG56|F1MG56_BOVIN	Serine/threonine-protein phosphatase 2A 55 kDa regulatory subunit B OS=Bos taurus GN=PPP2R2A PE=3 SV=2
	sp|P20456|IMPA1_BOVIN	Inositol monophosphatase 1 OS=Bos taurus GN=IMPA1 PE=1 SV=1
	tr|M0QVY0|M0QVY0_BOVIN	Uncharacterized protein OS=Bos taurus GN=KRT6A PE=3 SV=1
	sp|A1L595|K1C17_BOVIN	Keratin, type I cytoskeletal 17 OS=Bos taurus GN=KRT17 PE=2 SV=1
	sp|P81282|CSPG2_BOVIN	Versican core protein OS=Bos taurus GN=VCAN PE=1 SV=2
	sp|Q8MJG1|PSIP1_BOVIN	PC4 and SFRS1-interacting protein OS=Bos taurus GN=PSIP1 PE=2 SV=2
	sp|P80209|CATD_BOVIN	Cathepsin D OS=Bos taurus GN=CTSD PE=1 SV=2
	sp|P06623|CN37_BOVIN	2',3'-cyclic-nucleotide 3'-phosphodiesterase OS=Bos taurus GN=CNP PE=2 SV=2
	sp|Q0P5D2|CPSF6_BOVIN	Cleavage and polyadenylation specificity factor subunit 6 OS=Bos taurus GN=CPSF6 PE=2 SV=1
	tr|Q3T0F9|Q3T0F9_BOVIN	Growth factor receptor-bound protein 2 OS=Bos taurus GN=GRB2 PE=2 SV=1
	sp|A1L5A6|ADRM1_BOVIN	Proteasomal ubiquitin receptor ADRM1 OS=Bos taurus GN=ADRM1 PE=2 SV=1
	tr|F1MJH8|F1MJH8_BOVIN	Uncharacterized protein (Fragment) OS=Bos taurus GN=ARHGAP18 PE=2 SV=2
	sp|O02741|ISG15_BOVIN	Ubiquitin-like protein ISG15 OS=Bos taurus GN=ISG15 PE=2 SV=3
	tr|F1MV85|F1MV85_BOVIN	Uncharacterized protein OS=Bos taurus GN=PBDC1 PE=4 SV=1
	tr|E1BC32|E1BC32_BOVIN	Uncharacterized protein OS=Bos taurus PE=4 SV=2
	sp|Q3ZBH3|CD151_BOVIN	CD151 antigen OS=Bos taurus GN=CD151 PE=2 SV=1
	tr|F1MX60|F1MX60_BOVIN	Uncharacterized protein OS=Bos taurus GN=CYFIP2 PE=4 SV=2
	sp|Q2HJ57|COTL1_BOVIN	Coactosin-like protein OS=Bos taurus GN=COTL1 PE=2 SV=3
	sp|Q5E971|TMEDA_BOVIN	Transmembrane emp24 domain-containing protein 10 OS=Bos taurus GN=TMED10 PE=2 SV=1
	tr|E1B7F6|E1B7F6_BOVIN	Uncharacterized protein OS=Bos taurus GN=PLXNB1 PE=4 SV=2
	tr|G3MZX1|G3MZX1_BOVIN	Uncharacterized protein (Fragment) OS=Bos taurus GN=C6orf132 PE=4 SV=1
	tr|Q0VCZ7|Q0VCZ7_BOVIN	Ladinin 1 OS=Bos taurus GN=LAD1 PE=2 SV=1
	tr|Q2KJ47|Q2KJ47_BOVIN	EH-domain containing 2 OS=Bos taurus GN=EHD2 PE=2 SV=1
	tr|F1MC31|F1MC31_BOVIN	Uncharacterized protein OS=Bos taurus GN=SF3B2 PE=4 SV=1
	sp|Q17QC5|AP2S1_BOVIN	AP-2 complex subunit sigma OS=Bos taurus GN=AP2S1 PE=2 SV=1
	tr|F1MYN8|F1MYN8_BOVIN	Uncharacterized protein OS=Bos taurus GN=SON PE=4 SV=2
	tr|Q148J4|Q148J4_BOVIN	RAB2A, member RAS oncogene family OS=Bos taurus GN=RAB2A PE=2 SV=1
	tr|E1BMG2|E1BMG2_BOVIN	Uncharacterized protein OS=Bos taurus GN=DNAH5 PE=4 SV=2
	sp|Q2HJ54|PIPNA_BOVIN	Phosphatidylinositol transfer protein alpha isoform OS=Bos taurus GN=PITPNA PE=1 SV=3
	sp|Q3SYX9|ARPC5_BOVIN	Actin-related protein 2/3 complex subunit 5 OS=Bos taurus GN=ARPC5 PE=1 SV=3
	sp|A6BMK7|NEUR1_BOVIN	Sialidase-1 OS=Bos taurus GN=NEU1 PE=2 SV=2
	sp|P07995|INHBA_BOVIN	Inhibin beta A chain OS=Bos taurus GN=INHBA PE=1 SV=2
	sp|Q3B7N0|CAD13_BOVIN	Cadherin-13 OS=Bos taurus GN=CDH13 PE=2 SV=1
	sp|Q3SX42|CHM2B_BOVIN	Charged multivesicular body protein 2b OS=Bos taurus GN=CHMP2B PE=2 SV=1
	sp|Q3ZC91|ASM3A_BOVIN	Acid sphingomyelinase-like phosphodiesterase 3a OS=Bos taurus GN=SMPDL3A PE=2 SV=1
	sp|A7YWG4|GGH_BOVIN	Gamma-glutamyl hydrolase OS=Bos taurus GN=GGH PE=2 SV=1
	sp|P80929|ANG2_BOVIN	Angiogenin-2 OS=Bos taurus GN=ANG2 PE=1 SV=1
	sp|Q2KHZ8|GLCM_BOVIN	Glucosylceramidase OS=Bos taurus GN=GBA PE=2 SV=1
	sp|A6QQ92|SERP3_BOVIN	Serpin E3 OS=Bos taurus GN=SERPINE3 PE=2 SV=1
	sp|P13605|FMOD_BOVIN	Fibromodulin OS=Bos taurus GN=FMOD PE=1 SV=2
	sp|Q95132|ICAM1_BOVIN	Intercellular adhesion molecule 1 OS=Bos taurus GN=ICAM1 PE=2 SV=1
	sp|Q28193|FURIN_BOVIN	Furin OS=Bos taurus GN=FURIN PE=1 SV=1
	tr|A7Z066|A7Z066_BOVIN	Canx protein OS=Bos taurus GN=canx PE=2 SV=1
	sp|Q0VD19|ASM_BOVIN	Sphingomyelin phosphodiesterase OS=Bos taurus GN=SMPD1 PE=2 SV=1
	sp|P41976|SODM_BOVIN	Superoxide dismutase [Mn], mitochondrial OS=Bos taurus GN=SOD2 PE=2 SV=1
	sp|Q0VCA0|FGF18_BOVIN	Fibroblast growth factor 18 OS=Bos taurus GN=FGF18 PE=2 SV=1
	sp|Q07537|GALT1_BOVIN	Polypeptide N-acetylgalactosaminyltransferase 1 OS=Bos taurus GN=GALNT1 PE=1 SV=1
	tr|A0JNE6|A0JNE6_BOVIN	Eukaryotic translation initiation factor 2-alpha kinase 2 OS=Bos taurus GN=EIF2AK2 PE=2 SV=1
	sp|Q3T0P7|ITM2B_BOVIN	Integral membrane protein 2B OS=Bos taurus GN=ITM2B PE=2 SV=1
	sp|Q3T0I2|CATH_BOVIN	Pro-cathepsin H OS=Bos taurus GN=CTSH PE=2 SV=1
	tr|G3MX46|G3MX46_BOVIN	Uncharacterized protein OS=Bos taurus GN=CIC PE=4 SV=1
	sp|Q5QQ49|XYLT2_BOVIN	Xylosyltransferase 2 OS=Bos taurus GN=XYLT2 PE=2 SV=1
	sp|Q08DK4|GHC1_BOVIN	Mitochondrial glutamate carrier 1 OS=Bos taurus GN=SLC25A22 PE=2 SV=1
	tr|A7YW22|A7YW22_BOVIN	JAM3 protein OS=Bos taurus GN=JAM3 PE=2 SV=1
	sp|O77656|MMP13_BOVIN	Collagenase 3 OS=Bos taurus GN=MMP13 PE=2 SV=1
	tr|E1BN99|E1BN99_BOVIN	Uncharacterized protein OS=Bos taurus GN=ADAMTS15 PE=3 SV=1
	tr|A4FV32|A4FV32_BOVIN	PLEKHB2 protein OS=Bos taurus GN=PLEKHB2 PE=2 SV=1
	REVERSE_sp|P82919|RT18A_BOVIN-R	28S ribosomal protein S18a, mitochondrial OS=Bos taurus GN=MRPS18A PE=1 SV=3
	tr|B1H0W5|B1H0W5_BOVIN	PDGFB protein OS=Bos taurus GN=PDGFB PE=2 SV=1
	REVERSE_tr|Q5E9I4|Q5E9I4_BOVIN-R	MGAT1 protein OS=Bos taurus GN=MGAT1 PE=2 SV=1
	tr|E1BGF1|E1BGF1_BOVIN	Uncharacterized protein OS=Bos taurus GN=KIAA0513 PE=4 SV=2
	tr|E1BJX9|E1BJX9_BOVIN	Uncharacterized protein OS=Bos taurus GN=CCDC138 PE=2 SV=2
	tr|E1BF55|E1BF55_BOVIN	Uncharacterized protein (Fragment) OS=Bos taurus GN=MAP7D2 PE=4 SV=2
	tr|F1MHG5|F1MHG5_BOVIN	Uncharacterized protein (Fragment) OS=Bos taurus GN=ARHGAP21 PE=4 SV=2
	REVERSE_sp|A6H750|KIF2B_BOVIN-R	Kinesin-like protein KIF2B OS=Bos taurus GN=KIF2B PE=2 SV=1
	REVERSE_tr|F1ML08|F1ML08_BOVIN-R	Uncharacterized protein OS=Bos taurus GN=CCDC132 PE=4 SV=1
	REVERSE_tr|F1MZ23|F1MZ23_BOVIN-R	Uncharacterized protein (Fragment) OS=Bos taurus GN=PARD3 PE=4 SV=2
	tr|F1MVZ8|F1MVZ8_BOVIN	Uncharacterized protein (Fragment) OS=Bos taurus GN=NGEF PE=4 SV=2
	sp|Q27965|HS71B_BOVIN	Heat shock 70 kDa protein 1B OS=Bos taurus GN=HSPA1B PE=2 SV=1
	sp|Q2KJH4|WDR1_BOVIN	WD repeat-containing protein 1 OS=Bos taurus GN=WDR1 PE=2 SV=3
	tr|F1MTP5|F1MTP5_BOVIN	WD repeat-containing protein 1 OS=Bos taurus GN=WDR1 PE=4 SV=2
	sp|Q6B855|TKT_BOVIN	Transketolase OS=Bos taurus GN=TKT PE=2 SV=1
	sp|Q3MHP2|RB11B_BOVIN	Ras-related protein Rab-11B OS=Bos taurus GN=RAB11B PE=2 SV=3
	tr|E1B9F6|E1B9F6_BOVIN	Elongation factor 1-alpha OS=Bos taurus GN=EEF1A1 PE=3 SV=2
	tr|E1BJB1|E1BJB1_BOVIN	Tubulin beta-2B chain OS=Bos taurus GN=TUBB2B PE=2 SV=1
	tr|F1MWU9|F1MWU9_BOVIN	Uncharacterized protein OS=Bos taurus GN=HSPA6 PE=3 SV=2
	sp|P62833|RAP1A_BOVIN	Ras-related protein Rap-1A OS=Bos taurus GN=RAP1A PE=1 SV=1
	tr|A1L579|A1L579_BOVIN	Oviduct-specific glycoprotein OS=Bos taurus GN=OVGP1 PE=2 SV=1
	tr|G3N2V5|G3N2V5_BOVIN	Heat shock protein HSP 90-beta OS=Bos taurus GN=HSP90AB1 PE=3 SV=1
	sp|A7MAZ5|H13_BOVIN	Histone H1.3 OS=Bos taurus GN=HIST1H1D PE=1 SV=1
	tr|G3MWV5|G3MWV5_BOVIN	Uncharacterized protein OS=Bos taurus GN=HIST1H1E PE=3 SV=1
	sp|P13752|HA1A_BOVIN	BOLA class I histocompatibility antigen, alpha chain BL3-6 OS=Bos taurus PE=2 SV=1
	sp|Q3T0E7|PP1A_BOVIN	Serine/threonine-protein phosphatase PP1-alpha catalytic subunit OS=Bos taurus GN=PPP1CA PE=2 SV=1
	sp|Q2KJI3|FA49B_BOVIN	Protein FAM49B OS=Bos taurus GN=FAM49B PE=2 SV=1
	sp|Q3SZ43|UB2V2_BOVIN	Ubiquitin-conjugating enzyme E2 variant 2 OS=Bos taurus GN=UBE2V2 PE=2 SV=3
	tr|Q08DB4|Q08DB4_BOVIN	Copine I OS=Bos taurus GN=CPNE1 PE=2 SV=1
	REVERSE_tr|E1BH55|E1BH55_BOVIN-R	Uncharacterized protein OS=Bos taurus GN=LOC504623 PE=3 SV=2
	sp|A2VE52|ORN_BOVIN	Oligoribonuclease, mitochondrial OS=Bos taurus GN=REXO2 PE=2 SV=1
	sp|P00514|KAP0_BOVIN	cAMP-dependent protein kinase type I-alpha regulatory subunit OS=Bos taurus GN=PRKAR1A PE=1 SV=2
	sp|P04975|CLCB_BOVIN	Clathrin light chain B OS=Bos taurus GN=CLTB PE=1 SV=1
	sp|Q28024|GBG12_BOVIN	Guanine nucleotide-binding protein G(I)/G(S)/G(O) subunit gamma-12 OS=Bos taurus GN=GNG12 PE=1 SV=2
	sp|Q2HJB0|MBLC1_BOVIN	Metallo-beta-lactamase domain-containing protein 1 OS=Bos taurus GN=MBLAC1 PE=2 SV=1
	sp|Q3ZCD0|CD81_BOVIN	CD81 antigen OS=Bos taurus GN=CD81 PE=2 SV=1
	tr|A5D7E6|A5D7E6_BOVIN	CD82 protein OS=Bos taurus GN=CD82 PE=2 SV=1
	tr|E1BCA5|E1BCA5_BOVIN	Uncharacterized protein OS=Bos taurus GN=SERPINI1 PE=3 SV=2
	tr|E1BP80|E1BP80_BOVIN	Uncharacterized protein OS=Bos taurus GN=ZNF185 PE=4 SV=2
	tr|F1MEV4|F1MEV4_BOVIN	Uncharacterized protein OS=Bos taurus GN=LOC538751 PE=4 SV=1
	tr|F1N605|F1N605_BOVIN	Uncharacterized protein (Fragment) OS=Bos taurus GN=PICALM PE=4 SV=1
	tr|G5E6N7|G5E6N7_BOVIN	Uncharacterized protein OS=Bos taurus GN=CBX1 PE=4 SV=1
	tr|F1MZU1|F1MZU1_BOVIN	Uncharacterized protein (Fragment) OS=Bos taurus GN=LARP1 PE=4 SV=2
	tr|G3MXL3|G3MXL3_BOVIN	Uncharacterized protein (Fragment) OS=Bos taurus GN=KRT3 PE=3 SV=1
	tr|A7MB04|A7MB04_BOVIN	SPOCK2 protein OS=Bos taurus GN=SPOCK2 PE=2 SV=1
	sp|Q2KHT7|RS27_BOVIN	40S ribosomal protein S27 OS=Bos taurus GN=RPS27 PE=3 SV=3
	tr|G3N0T0|G3N0T0_BOVIN	Uncharacterized protein OS=Bos taurus GN=LOC510369 PE=4 SV=1
	tr|G3X6B2|G3X6B2_BOVIN	Uncharacterized protein OS=Bos taurus GN=PRRC2C PE=2 SV=1
	sp|Q0V8R6|HEXA_BOVIN	Beta-hexosaminidase subunit alpha OS=Bos taurus GN=HEXA PE=2 SV=1
	sp|Q2NKU3|BUD31_BOVIN	Protein BUD31 homolog OS=Bos taurus GN=BUD31 PE=2 SV=1
	tr|A7MBI8|A7MBI8_BOVIN	NUDT9 protein OS=Bos taurus GN=NUDT9 PE=2 SV=1
	REVERSE_tr|F1MC13|F1MC13_BOVIN-R	Uncharacterized protein (Fragment) OS=Bos taurus GN=LAMA5 PE=4 SV=2
	tr|F1MWX3|F1MWX3_BOVIN	Uncharacterized protein (Fragment) OS=Bos taurus GN=BOLA PE=3 SV=2
	tr|E1BLL9|E1BLL9_BOVIN	Uncharacterized protein OS=Bos taurus GN=OAF PE=4 SV=2
	sp|P61283|BAF_BOVIN	Barrier-to-autointegration factor OS=Bos taurus GN=BANF1 PE=3 SV=1
	sp|Q58DS5|RAB13_BOVIN	Ras-related protein Rab-13 OS=Bos taurus GN=RAB13 PE=1 SV=1
	sp|Q148F1|COF2_BOVIN	Cofilin-2 OS=Bos taurus GN=CFL2 PE=2 SV=1
	REVERSE_sp|Q1JQC1|MFSD1_BOVIN-R	Major facilitator superfamily domain-containing protein 1 OS=Bos taurus GN=MFSD1 PE=2 SV=1
	tr|Q2KJ86|Q2KJ86_BOVIN	Haloacid dehalogenase-like hydrolase domain containing 1A OS=Bos taurus GN=HDHD1A PE=2 SV=1
	sp|Q95107|WASL_BOVIN	Neural Wiskott-Aldrich syndrome protein OS=Bos taurus GN=WASL PE=1 SV=1
	tr|F6RF06|F6RF06_BOVIN	Uncharacterized protein (Fragment) OS=Bos taurus GN=BOLA PE=2 SV=1
	sp|Q3SZC0|ERH_BOVIN	Enhancer of rudimentary homolog OS=Bos taurus GN=ERH PE=3 SV=1
	tr|F2Z4H3|F2Z4H3_BOVIN	Uncharacterized protein OS=Bos taurus GN=POLR2H PE=2 SV=1
	tr|Q1RMI2|Q1RMI2_BOVIN	Ras homolog gene family, member G (Rho G) OS=Bos taurus GN=RHOG PE=2 SV=1
	sp|A6H730|PPAP_BOVIN	Prostatic acid phosphatase OS=Bos taurus GN=ACPP PE=2 SV=1
	sp|P28782|S10A8_BOVIN	Protein S100-A8 OS=Bos taurus GN=S100A8 PE=1 SV=2
	sp|Q05204|LAMP1_BOVIN	Lysosome-associated membrane glycoprotein 1 OS=Bos taurus GN=LAMP1 PE=1 SV=2
	tr|B2Z4B0|B2Z4B0_BOVIN	Angiopoietin-like protein 2 OS=Bos taurus GN=ANGPTL2 PE=2 SV=1
	tr|Q08DU4|Q08DU4_BOVIN	Interleukin 10 receptor, beta OS=Bos taurus GN=IL10RB PE=2 SV=1
	tr|Q1JPD9|Q1JPD9_BOVIN	G protein-coupled receptor, family C, group 5, member B OS=Bos taurus GN=GPRC5B PE=2 SV=1
	tr|Q2LGB2|Q2LGB2_BOVIN	Lymphocyte antigen 96 OS=Bos taurus GN=MD2 PE=2 SV=1
	sp|O46675|GROG_BOVIN	Growth-regulated protein homolog gamma OS=Bos taurus PE=3 SV=1
	tr|A7YW37|A7YW37_BOVIN	CD58 protein (Fragment) OS=Bos taurus GN=CD58 PE=2 SV=1
	sp|Q28132|SCF_BOVIN	Kit ligand OS=Bos taurus GN=KITLG PE=2 SV=1
	sp|Q3SX46|C1GLC_BOVIN	C1GALT1-specific chaperone 1 OS=Bos taurus GN=C1GALT1C1 PE=2 SV=1
	tr|Q2TBX9|Q2TBX9_BOVIN	Integrin alpha FG-GAP repeat containing 1 OS=Bos taurus GN=ITFG1 PE=2 SV=1
	tr|A5PKA3|A5PKA3_BOVIN	CCDC80 protein OS=Bos taurus GN=CCDC80 PE=2 SV=1
	sp|Q28017|PAFA_BOVIN	Platelet-activating factor acetylhydrolase OS=Bos taurus GN=PLA2G7 PE=2 SV=1
	sp|P48818|ACADV_BOVIN	Very long-chain specific acyl-CoA dehydrogenase, mitochondrial OS=Bos taurus GN=ACADVL PE=2 SV=3
	tr|F1N4Y5|F1N4Y5_BOVIN	Uncharacterized protein OS=Bos taurus GN=BOLA-NC1 PE=3 SV=2
	tr|E1BJC9|E1BJC9_BOVIN	Uncharacterized protein OS=Bos taurus GN=C18H19orf33 PE=4 SV=2
	tr|Q08E55|Q08E55_BOVIN	MBTPS1 protein OS=Bos taurus GN=MBTPS1 PE=2 SV=1
	tr|F1N3G9|F1N3G9_BOVIN	Uncharacterized protein (Fragment) OS=Bos taurus GN=KIRREL PE=4 SV=2
	tr|F1MD22|F1MD22_BOVIN	Uncharacterized protein OS=Bos taurus GN=PTPRU PE=4 SV=2
	REVERSE_tr|F1MLY7|F1MLY7_BOVIN-R	Uncharacterized protein (Fragment) OS=Bos taurus GN=ATR PE=4 SV=2
	sp|A7Z035|EPN4_BOVIN	Clathrin interactor 1 OS=Bos taurus GN=CLINT1 PE=2 SV=1
	tr|Q3ZC60|Q3ZC60_BOVIN	CD200 molecule OS=Bos taurus GN=CD200 PE=2 SV=1
	tr|G3N081|G3N081_BOVIN	Histone H4 OS=Bos taurus GN=LOC100337473 PE=3 SV=1
	sp|P79391|OLR1_BOVIN	Oxidized low-density lipoprotein receptor 1 OS=Bos taurus GN=OLR1 PE=1 SV=1
	REVERSE_tr|E1B882|E1B882_BOVIN-R	Uncharacterized protein OS=Bos taurus GN=MXRA5 PE=4 SV=1
	sp|Q32PH8|EF1A2_BOVIN	Elongation factor 1-alpha 2 OS=Bos taurus GN=EEF1A2 PE=2 SV=1
	tr|Q32KR9|Q32KR9_BOVIN	Chromatin modifying protein 1A OS=Bos taurus GN=CHMP1A PE=2 SV=1
	REVERSE_tr|E1BBB3|E1BBB3_BOVIN-R	Uncharacterized protein OS=Bos taurus GN=LOC100138004 PE=4 SV=2
	sp|Q2KHV5|NDUF7_BOVIN	NADH dehydrogenase [ubiquinone] complex I, assembly factor 7 OS=Bos taurus GN=NDUFAF7 PE=2 SV=2
	tr|E1BIU0|E1BIU0_BOVIN	Uncharacterized protein OS=Bos taurus GN=SEC24C PE=4 SV=1
	tr|F1N0T3|F1N0T3_BOVIN	Uncharacterized protein OS=Bos taurus GN=LOC404051 PE=3 SV=2
	REVERSE_tr|E1BEH3|E1BEH3_BOVIN-R	Uncharacterized protein (Fragment) OS=Bos taurus GN=KCNK15 PE=3 SV=2
	REVERSE_tr|F1MPK7|F1MPK7_BOVIN-R	Uncharacterized protein (Fragment) OS=Bos taurus GN=LOC516421 PE=2 SV=2
	sp|O18963|CP2E1_BOVIN	Cytochrome P450 2E1 OS=Bos taurus GN=CYP2E1 PE=2 SV=1
	tr|E1BM53|E1BM53_BOVIN	Uncharacterized protein OS=Bos taurus GN=RSG1 PE=4 SV=1
	REVERSE_tr|E1BFC3|E1BFC3_BOVIN-R	Uncharacterized protein OS=Bos taurus GN=DFNA5 PE=4 SV=1
	tr|F6R7H1|F6R7H1_BOVIN	Uncharacterized protein OS=Bos taurus GN=UPP2 PE=4 SV=1
	REVERSE_sp|Q32L08|AMN1_BOVIN-R	Protein AMN1 homolog OS=Bos taurus GN=AMN1 PE=2 SV=2
	tr|F1MY95|F1MY95_BOVIN	Uncharacterized protein OS=Bos taurus GN=KCND3 PE=4 SV=2
	REVERSE_tr|F1N2X1|F1N2X1_BOVIN-R	Uncharacterized protein OS=Bos taurus GN=SLC12A6 PE=4 SV=2
	tr|F1MCN4|F1MCN4_BOVIN	Uncharacterized protein OS=Bos taurus GN=STARD13 PE=4 SV=2
	REVERSE_tr|F1MDU7|F1MDU7_BOVIN-R	DNA topoisomerase 2 OS=Bos taurus GN=TOP2A PE=3 SV=2
	tr|G3X6W2|G3X6W2_BOVIN	Uncharacterized protein OS=Bos taurus GN=LOC101909711 PE=4 SV=1
	tr|Q29RS3|Q29RS3_BOVIN	IQ motif containing B1 OS=Bos taurus GN=IQCB1 PE=2 SV=1
	REVERSE_sp|Q24K09|DNMT1_BOVIN-R	DNA (cytosine-5)-methyltransferase 1 OS=Bos taurus GN=DNMT1 PE=2 SV=1
	REVERSE_tr|E1BHE1|E1BHE1_BOVIN-R	Uncharacterized protein OS=Bos taurus GN=TAOK3 PE=4 SV=1
	sp|P26285|F262_BOVIN	6-phosphofructo-2-kinase/fructose-2,6-bisphosphatase 2 OS=Bos taurus GN=PFKFB2 PE=1 SV=2
	sp|Q2T9P3|RGP1_BOVIN	Retrograde Golgi transport protein RGP1 homolog OS=Bos taurus GN=RGP1 PE=2 SV=1
	sp|Q148H5|K2C71_BOVIN	Keratin, type II cytoskeletal 71 OS=Bos taurus GN=KRT71 PE=2 SV=1
	tr|E1BKL5|E1BKL5_BOVIN	Uncharacterized protein OS=Bos taurus GN=PAX7 PE=3 SV=1
	tr|Q17QR2|Q17QR2_BOVIN	STAM binding protein OS=Bos taurus GN=STAMBP PE=2 SV=1
	tr|E1BC58|E1BC58_BOVIN	Uncharacterized protein OS=Bos taurus GN=RAB2B PE=3 SV=1
	sp|P01008|ANT3_HUMAN	Antithrombin-III OS=Homo sapiens GN=SERPINC1 PE=1 SV=1
	sp|Q0VD34|PHYIP_BOVIN	Phytanoyl-CoA hydroxylase-interacting protein OS=Bos taurus GN=PHYHIP PE=2 SV=1
	REVERSE_tr|F1MPC2|F1MPC2_BOVIN-R	Anoctamin (Fragment) OS=Bos taurus GN=ANO5 PE=3 SV=2
	REVERSE_tr|Q0IIG0|Q0IIG0_BOVIN-R	Nucleolar and coiled-body phosphoprotein 1 OS=Bos taurus GN=NOLC1 PE=2 SV=1
	REVERSE_tr|E1BNV7|E1BNV7_BOVIN-R	Uncharacterized protein OS=Bos taurus GN=MYO9B PE=4 SV=2
	sp|Q27975|HS71A_BOVIN	Heat shock 70 kDa protein 1A OS=Bos taurus GN=HSPA1A PE=1 SV=2
	tr|A5D973|A5D973_BOVIN	Alpha isoform of regulatory subunit A, protein phosphatase 2 OS=Bos taurus GN=PPP2R1A PE=2 SV=1
	tr|F1MR96|F1MR96_BOVIN	Calpastatin OS=Bos taurus GN=CAST PE=2 SV=2
	tr|F1MD74|F1MD74_BOVIN	Calpastatin OS=Bos taurus GN=CAST PE=2 SV=2
	tr|A6H7A2|A6H7A2_BOVIN	Adenosine deaminase OS=Bos taurus GN=ADA PE=2 SV=1
	sp|P56658|ADA_BOVIN	Adenosine deaminase OS=Bos taurus GN=ADA PE=1 SV=3
	tr|G3N2F0|G3N2F0_BOVIN	Elongation factor 1-alpha OS=Bos taurus PE=3 SV=1
	tr|F2Z4D5|F2Z4D5_BOVIN	Ras-related protein Rab-11A OS=Bos taurus GN=RAB11A PE=3 SV=1
	sp|Q6B856|TBB2B_BOVIN	Tubulin beta-2B chain OS=Bos taurus GN=TUBB2B PE=1 SV=2
	sp|P20811|ICAL_BOVIN	Calpastatin OS=Bos taurus GN=CAST PE=1 SV=2
	sp|Q71SP7|FAS_BOVIN	Fatty acid synthase OS=Bos taurus GN=FASN PE=2 SV=1
	sp|Q2T9S0|TBB3_BOVIN	Tubulin beta-3 chain OS=Bos taurus GN=TUBB3 PE=2 SV=1
	sp|A1A4R1|H2A2C_BOVIN	Histone H2A type 2-C OS=Bos taurus GN=HIST2H2AC PE=2 SV=1
	tr|F2Z4J1|F2Z4J1_BOVIN	Histone H2A OS=Bos taurus GN=HIST1H2AC PE=3 SV=1
	sp|P61223|RAP1B_BOVIN	Ras-related protein Rap-1b OS=Bos taurus GN=RAP1B PE=2 SV=1
	sp|Q28178|TSP1_BOVIN	Thrombospondin-1 OS=Bos taurus GN=THBS1 PE=2 SV=2
	sp|A6QPN6|GILT_BOVIN	Gamma-interferon-inducible lysosomal thiol reductase OS=Bos taurus GN=IFI30 PE=2 SV=1
	sp|P41361|ANT3_BOVIN	Antithrombin-III OS=Bos taurus GN=SERPINC1 PE=1 SV=2
	tr|F1MEP6|F1MEP6_BOVIN	Epithelial cell adhesion molecule OS=Bos taurus GN=EPCAM PE=4 SV=1
	sp|Q6R8F2|CADH1_BOVIN	Cadherin-1 OS=Bos taurus GN=CDH1 PE=2 SV=1
	sp|P02253|H12_BOVIN	Histone H1.2 OS=Bos taurus GN=HIST1H1C PE=1 SV=2
	sp|Q3T0B7|RS27L_BOVIN	40S ribosomal protein S27-like OS=Bos taurus GN=RPS27L PE=3 SV=3
	sp|Q0V8J4|VWA7_BOVIN	von Willebrand factor A domain-containing protein 7 OS=Bos taurus GN=VWA7 PE=2 SV=1
	tr|F1N6I5|F1N6I5_BOVIN	Versican core protein OS=Bos taurus GN=VCAN PE=2 SV=1
	tr|G3MZC1|G3MZC1_BOVIN	5'-nucleotidase (Fragment) OS=Bos taurus GN=NT5E PE=4 SV=1
	tr|F1MRG7|F1MRG7_BOVIN	Actin-related protein 2 OS=Bos taurus GN=ACTR2 PE=3 SV=2
	sp|Q148H7|K2C79_BOVIN	Keratin, type II cytoskeletal 79 OS=Bos taurus GN=KRT79 PE=2 SV=1
	tr|G3MZL8|G3MZL8_BOVIN	Uncharacterized protein (Fragment) OS=Bos taurus PE=3 SV=1
	tr|G3X7S7|G3X7S7_BOVIN	Tropomyosin alpha-1 chain (Fragment) OS=Bos taurus GN=TPM1 PE=3 SV=1
	sp|P33545|DSC2_BOVIN	Desmocollin-2 (Fragment) OS=Bos taurus GN=DSC2 PE=2 SV=1
	tr|A2VDX0|A2VDX0_BOVIN	TWF2 protein OS=Bos taurus GN=TWF2 PE=2 SV=1
	sp|A6QNX5|K2C78_BOVIN	Keratin, type II cytoskeletal 78 OS=Bos taurus GN=KRT78 PE=2 SV=1
	tr|F1MKE7|F1MKE7_BOVIN	Uncharacterized protein (Fragment) OS=Bos taurus PE=3 SV=2
	tr|E1B9E8|E1B9E8_BOVIN	Beta-hexosaminidase OS=Bos taurus PE=3 SV=2
	tr|E1BGX1|E1BGX1_BOVIN	Uncharacterized protein OS=Bos taurus GN=TAF15 PE=4 SV=2
	sp|P61626|LYSC_HUMAN	Lysozyme C OS=Homo sapiens GN=LYZ PE=1 SV=1
	tr|G3MYV4|G3MYV4_BOVIN	Histone H2B OS=Bos taurus GN=LOC520044 PE=3 SV=1
	tr|E1BCW3|E1BCW3_BOVIN	6-phosphofructokinase OS=Bos taurus GN=PFKP PE=3 SV=2
	sp|Q3SZ52|UB2V1_BOVIN	Ubiquitin-conjugating enzyme E2 variant 1 OS=Bos taurus GN=UBE2V1 PE=2 SV=1
	tr|F1MVX6|F1MVX6_BOVIN	Histone H2B OS=Bos taurus GN=LOC101906927 PE=3 SV=2
	sp|P48616|VIME_BOVIN	Vimentin OS=Bos taurus GN=VIM PE=1 SV=3
	sp|A2VE31|S38A2_BOVIN	Sodium-coupled neutral amino acid transporter 2 OS=Bos taurus GN=SLC38A2 PE=2 SV=1
	sp|A2VE47|ADPGK_BOVIN	ADP-dependent glucokinase OS=Bos taurus GN=ADPGK PE=2 SV=1
	sp|F1MH07|MICA1_BOVIN	Protein-methionine sulfoxide oxidase MICAL1 OS=Bos taurus GN=MICAL1 PE=2 SV=1
	sp|P08814|PTMS_BOVIN	Parathymosin OS=Bos taurus GN=PTMS PE=1 SV=2
	sp|P19483|ATPA_BOVIN	ATP synthase subunit alpha, mitochondrial OS=Bos taurus GN=ATP5A1 PE=1 SV=1
	sp|P21327|INPP_BOVIN	Inositol polyphosphate 1-phosphatase OS=Bos taurus GN=INPP1 PE=1 SV=2
	sp|P21809|PGS1_BOVIN	Biglycan OS=Bos taurus GN=BGN PE=1 SV=3
	sp|P52176|MMP9_BOVIN	Matrix metalloproteinase-9 OS=Bos taurus GN=MMP9 PE=2 SV=1
	sp|P60986|PIP_BOVIN	Prolactin-inducible protein homolog OS=Bos taurus GN=PIP PE=3 SV=1
	sp|Q0P570|MVD1_BOVIN	Diphosphomevalonate decarboxylase OS=Bos taurus GN=MVD PE=2 SV=1
	sp|Q1JQA7|TIGAR_BOVIN	Fructose-2,6-bisphosphatase TIGAR OS=Bos taurus GN=TIGAR PE=2 SV=1
	sp|Q32PI9|MPZL1_BOVIN	Myelin protein zero-like protein 1 OS=Bos taurus GN=MPZL1 PE=2 SV=1
	sp|Q3T0N1|MB12A_BOVIN	Multivesicular body subunit 12A OS=Bos taurus GN=MVB12A PE=2 SV=1
	sp|Q92180|GCNT1_BOVIN	Beta-1,3-galactosyl-O-glycosyl-glycoprotein beta-1,6-N-acetylglucosaminyltransferase OS=Bos taurus GN=GCNT1 PE=2 SV=1
	sp|Q9XSC9|TCO2_BOVIN	Transcobalamin-2 OS=Bos taurus GN=TCN2 PE=1 SV=1
	tr|A4IFU2|A4IFU2_BOVIN	RAP2B protein OS=Bos taurus GN=RAP2B PE=2 SV=1
	tr|E1B725|E1B725_BOVIN	Uncharacterized protein OS=Bos taurus GN=GLA PE=4 SV=2
	tr|E1B8A0|E1B8A0_BOVIN	Uncharacterized protein OS=Bos taurus GN=ACP5 PE=2 SV=1
	tr|E1BD36|E1BD36_BOVIN	Uncharacterized protein OS=Bos taurus GN=IL6ST PE=4 SV=1
	tr|E1BDA6|E1BDA6_BOVIN	Fibroblast growth factor OS=Bos taurus GN=FGF21 PE=3 SV=1
	tr|E1BFD0|E1BFD0_BOVIN	Uncharacterized protein OS=Bos taurus GN=CHI3L2 PE=3 SV=1
	tr|E1BQ28|E1BQ28_BOVIN	Uncharacterized protein OS=Bos taurus GN=SLC39A8 PE=4 SV=1
	tr|F1MLT0|F1MLT0_BOVIN	Uncharacterized protein OS=Bos taurus GN=BMP7 PE=2 SV=1
	tr|F1MQX1|F1MQX1_BOVIN	Uncharacterized protein OS=Bos taurus GN=SRPX PE=4 SV=1
	tr|F1MRR1|F1MRR1_BOVIN	Uncharacterized protein (Fragment) OS=Bos taurus GN=KREMEN1 PE=4 SV=1
	tr|F1MTX6|F1MTX6_BOVIN	Uncharacterized protein (Fragment) OS=Bos taurus GN=MMP3 PE=4 SV=2
	tr|F1MUC5|F1MUC5_BOVIN	Uncharacterized protein OS=Bos taurus GN=COL15A1 PE=4 SV=2
	tr|F1MVT9|F1MVT9_BOVIN	Uncharacterized protein (Fragment) OS=Bos taurus GN=SPOCK1 PE=4 SV=2
	tr|F1MXD2|F1MXD2_BOVIN	Uncharacterized protein (Fragment) OS=Bos taurus GN=CDCP1 PE=4 SV=2
	tr|F1N1S6|F1N1S6_BOVIN	Uncharacterized protein (Fragment) OS=Bos taurus GN=C1RL PE=4 SV=2
	tr|F1N2D5|F1N2D5_BOVIN	Uncharacterized protein OS=Bos taurus GN=IDS PE=4 SV=2
	tr|F1N2J8|F1N2J8_BOVIN	Uncharacterized protein OS=Bos taurus GN=C16orf89 PE=4 SV=2
	tr|F1N348|F1N348_BOVIN	Uncharacterized protein OS=Bos taurus GN=AMIGO2 PE=4 SV=2
	tr|F1N5W4|F1N5W4_BOVIN	Uncharacterized protein (Fragment) OS=Bos taurus GN=ENPP5 PE=4 SV=2
	tr|F6QLF1|F6QLF1_BOVIN	Uncharacterized protein OS=Bos taurus GN=HAPLN3 PE=4 SV=1
	tr|G3MWH1|G3MWH1_BOVIN	Uncharacterized protein OS=Bos taurus GN=TPD52L2 PE=2 SV=1
	tr|G3X6G7|G3X6G7_BOVIN	Uncharacterized protein OS=Bos taurus GN=METRNL PE=4 SV=1
	tr|G5E598|G5E598_BOVIN	Uncharacterized protein OS=Bos taurus GN=CD99 PE=4 SV=1
	tr|Q0II49|Q0II49_BOVIN	Interferon-induced protein 35 OS=Bos taurus GN=IFI35 PE=2 SV=1
	tr|Q0VCH9|Q0VCH9_BOVIN	GLI pathogenesis-related 2 OS=Bos taurus GN=GLIPR2 PE=2 SV=1
	tr|Q2KI48|Q2KI48_BOVIN	Pituitary tumor-transforming 1 interacting protein OS=Bos taurus GN=PTTG1IP PE=2 SV=1
	tr|Q2NL04|Q2NL04_BOVIN	TAP binding protein (Tapasin) OS=Bos taurus GN=TAPBP PE=2 SV=1
	tr|Q2YDK6|Q2YDK6_BOVIN	Dickkopf-like 1 (Soggy) OS=Bos taurus GN=DKKL1 PE=2 SV=1
	tr|Q9N0E6|Q9N0E6_BOVIN	Midkine OS=Bos taurus GN=bMK PE=2 SV=1
	sp|Q3T0C6|AT1B3_BOVIN	Sodium/potassium-transporting ATPase subunit beta-3 OS=Bos taurus GN=ATP1B3 PE=2 SV=1
	sp|Q5E9B5|ACTH_BOVIN	Actin, gamma-enteric smooth muscle OS=Bos taurus GN=ACTG2 PE=2 SV=1
	tr|E1BN54|E1BN54_BOVIN	Uncharacterized protein OS=Bos taurus GN=CER1 PE=4 SV=1
	tr|E1BAU7|E1BAU7_BOVIN	Uncharacterized protein OS=Bos taurus GN=SERPINB7 PE=3 SV=1
	tr|F1MNK0|F1MNK0_BOVIN	Uncharacterized protein OS=Bos taurus GN=BCL2L13 PE=4 SV=1
	tr|F1MUJ7|F1MUJ7_BOVIN	Uncharacterized protein (Fragment) OS=Bos taurus GN=B4GALT5 PE=4 SV=1
	tr|E1BMI4|E1BMI4_BOVIN	Uncharacterized protein OS=Bos taurus GN=UXS1 PE=4 SV=1
	REVERSE_tr|Q2TBH3|Q2TBH3_BOVIN-R	Actin related protein M1 OS=Bos taurus GN=ARPM1 PE=2 SV=1
	sp|A2VDN6|SF3A1_BOVIN	Splicing factor 3A subunit 1 OS=Bos taurus GN=SF3A1 PE=2 SV=1
	tr|E1BB36|E1BB36_BOVIN	Uncharacterized protein (Fragment) OS=Bos taurus GN=MGAT2 PE=4 SV=2
	tr|E1BBU4|E1BBU4_BOVIN	Uncharacterized protein OS=Bos taurus GN=ADAM15 PE=4 SV=2
	sp|A2VDP5|ENPP4_BOVIN	Bis(5'-adenosyl)-triphosphatase ENPP4 OS=Bos taurus GN=ENPP4 PE=2 SV=1
	sp|Q6B411|LYSM_BOVIN	Lysozyme C, milk isozyme OS=Bos taurus PE=2 SV=1
	tr|F1MM68|F1MM68_BOVIN	Interstitial collagenase (Fragment) OS=Bos taurus GN=MMP1 PE=4 SV=2
	tr|G3N2P6|G3N2P6_BOVIN	Uncharacterized protein OS=Bos taurus GN=LOC101905591 PE=3 SV=1
	REVERSE_tr|E1BAE9|E1BAE9_BOVIN-R	Uncharacterized protein OS=Bos taurus GN=ZNF461 PE=4 SV=2
	sp|A5D7M7|TMM88_BOVIN	Transmembrane protein 88 OS=Bos taurus GN=TMEM88 PE=2 SV=1
	REVERSE_sp|Q2KHV7|UBP2_BOVIN-R	Ubiquitin carboxyl-terminal hydrolase 2 OS=Bos taurus GN=USP2 PE=2 SV=1
	tr|F1MHJ6|F1MHJ6_BOVIN	60S ribosomal protein L18a OS=Bos taurus PE=3 SV=2
	tr|G3N222|G3N222_BOVIN	Uncharacterized protein (Fragment) OS=Bos taurus PE=3 SV=1
	REVERSE_sp|Q3ZBY7|DEGS1_BOVIN-R	Sphingolipid delta(4)-desaturase DES1 OS=Bos taurus GN=DEGS1 PE=2 SV=1
	sp|Q3MHE8|SRPR_BOVIN	Signal recognition particle receptor subunit alpha OS=Bos taurus GN=SRPR PE=2 SV=1
	tr|G3N3V1|G3N3V1_BOVIN	Uncharacterized protein OS=Bos taurus PE=3 SV=1
	tr|F1MLK9|F1MLK9_BOVIN	Uncharacterized protein OS=Bos taurus GN=HSCB PE=4 SV=1
	tr|Q08E01|Q08E01_BOVIN	Adducin 3 (Gamma) OS=Bos taurus GN=ADD3 PE=2 SV=1
	tr|E1BHD8|E1BHD8_BOVIN	Uncharacterized protein OS=Bos taurus GN=GXYLT1 PE=4 SV=1
	tr|E1BKB7|E1BKB7_BOVIN	Uncharacterized protein OS=Bos taurus GN=MGA PE=3 SV=2
	REVERSE_tr|E1BIS9|E1BIS9_BOVIN-R	Uncharacterized protein OS=Bos taurus GN=SULT1C3 PE=4 SV=1
	REVERSE_tr|F1MZX0|F1MZX0_BOVIN-R	Protein kinase C delta type OS=Bos taurus GN=PRKCD PE=3 SV=1
	sp|Q3SZU0|GTSF1_BOVIN	Gametocyte-specific factor 1 OS=Bos taurus GN=GTSF1 PE=2 SV=1
	tr|A7MB72|A7MB72_BOVIN	MGC166429 protein OS=Bos taurus GN=MGC166429 PE=2 SV=1
	tr|A7YY64|A7YY64_BOVIN	B3GNT2 protein OS=Bos taurus GN=B3GNT2 PE=2 SV=1
	tr|E1B8U3|E1B8U3_BOVIN	Uncharacterized protein OS=Bos taurus GN=GREB1 PE=4 SV=2
	sp|P04040|CATA_HUMAN	Catalase OS=Homo sapiens GN=CAT PE=1 SV=3
	tr|F1MUT0|F1MUT0_BOVIN	Uncharacterized protein OS=Bos taurus GN=SETD7 PE=4 SV=1
	tr|E1BDM4|E1BDM4_BOVIN	Uncharacterized protein OS=Bos taurus GN=FIBCD1 PE=4 SV=2
	sp|Q58CS6|IFT20_BOVIN	Intraflagellar transport protein 20 homolog OS=Bos taurus GN=IFT20 PE=2 SV=1
	tr|E1BNW5|E1BNW5_BOVIN	Uncharacterized protein OS=Bos taurus GN=SH3D19 PE=4 SV=2
	sp|A6QLR4|FLOT2_BOVIN	Flotillin-2 OS=Bos taurus GN=FLOT2 PE=2 SV=1
	Total	1148

## Sheet: OEC-S4
	OEC-S4: Total proteins identified
	Accession	Protein Name
	sp|P02769|ALBU_BOVIN	Serum albumin OS=Bos taurus GN=ALB PE=1 SV=4
	sp|Q2UVX4|CO3_BOVIN	Complement C3 OS=Bos taurus GN=C3 PE=1 SV=2
	sp|Q7SIH1|A2MG_BOVIN	Alpha-2-macroglobulin OS=Bos taurus GN=A2M PE=1 SV=2
	sp|P31976|EZRI_BOVIN	Ezrin OS=Bos taurus GN=EZR PE=1 SV=2
	sp|Q76LV2|HS90A_BOVIN	Heat shock protein HSP 90-alpha OS=Bos taurus GN=HSP90AA1 PE=1 SV=3
	sp|P07589|FINC_BOVIN	Fibronectin OS=Bos taurus GN=FN1 PE=1 SV=4
	sp|Q0VCX2|GRP78_BOVIN	78 kDa glucose-regulated protein OS=Bos taurus GN=HSPA5 PE=2 SV=1
	sp|Q3SYU2|EF2_BOVIN	Elongation factor 2 OS=Bos taurus GN=EEF2 PE=2 SV=3
	sp|Q9HWK6|LYSC_PSEAE	Lysyl endopeptidase OS=Pseudomonas aeruginosa (strain ATCC 15692 / PAO1 / 1C / PRS 101 / LMG 12228) GN=prpL PE=1 SV=1
	tr|Q0P5D6|Q0P5D6_BOVIN	Retinoic acid receptor responder (Tazarotene induced) 1 OS=Bos taurus GN=RARRES1 PE=2 SV=1
	tr|G3X757|G3X757_BOVIN	Transitional endoplasmic reticulum ATPase OS=Bos taurus GN=VCP PE=4 SV=1
	sp|P17697|CLUS_BOVIN	Clusterin OS=Bos taurus GN=CLU PE=1 SV=1
	sp|Q9XSJ4|ENOA_BOVIN	Alpha-enolase OS=Bos taurus GN=ENO1 PE=1 SV=4
	sp|P04272|ANXA2_BOVIN	Annexin A2 OS=Bos taurus GN=ANXA2 PE=1 SV=2
	sp|A5D7D1|ACTN4_BOVIN	Alpha-actinin-4 OS=Bos taurus GN=ACTN4 PE=2 SV=1
	tr|A5D984|A5D984_BOVIN	Pyruvate kinase OS=Bos taurus GN=PKM2 PE=2 SV=1
	tr|F1MM32|F1MM32_BOVIN	Sulfhydryl oxidase OS=Bos taurus GN=QSOX1 PE=3 SV=2
	sp|P81187|CFAB_BOVIN	Complement factor B OS=Bos taurus GN=CFB PE=1 SV=2
	tr|A5D7E8|A5D7E8_BOVIN	PDIA3 protein OS=Bos taurus GN=PDIA3 PE=2 SV=1
	sp|P19120|HSP7C_BOVIN	Heat shock cognate 71 kDa protein OS=Bos taurus GN=HSPA8 PE=1 SV=2
	sp|Q95M18|ENPL_BOVIN	Endoplasmin OS=Bos taurus GN=HSP90B1 PE=2 SV=1
	sp|Q05589|UROK_BOVIN	Urokinase-type plasminogen activator OS=Bos taurus GN=PLAU PE=2 SV=1
	sp|Q95114|MFGM_BOVIN	Lactadherin OS=Bos taurus GN=MFGE8 PE=1 SV=2
	sp|Q3T0P6|PGK1_BOVIN	Phosphoglycerate kinase 1 OS=Bos taurus GN=PGK1 PE=2 SV=3
	sp|P15497|APOA1_BOVIN	Apolipoprotein A-I OS=Bos taurus GN=APOA1 PE=1 SV=3
	sp|P10096|G3P_BOVIN	Glyceraldehyde-3-phosphate dehydrogenase OS=Bos taurus GN=GAPDH PE=1 SV=4
	sp|P46193|ANXA1_BOVIN	Annexin A1 OS=Bos taurus GN=ANXA1 PE=2 SV=2
	sp|Q5E956|TPIS_BOVIN	Triosephosphate isomerase OS=Bos taurus GN=TPI1 PE=2 SV=3
	sp|Q3ZBD7|G6PI_BOVIN	Glucose-6-phosphate isomerase OS=Bos taurus GN=GPI PE=2 SV=4
	sp|Q2HJ49|MOES_BOVIN	Moesin OS=Bos taurus GN=MSN PE=2 SV=3
	tr|A6QLL8|A6QLL8_BOVIN	Fructose-bisphosphate aldolase OS=Bos taurus GN=ALDOA PE=2 SV=1
	sp|P04264|K2C1_HUMAN	Keratin, type II cytoskeletal 1 OS=Homo sapiens GN=KRT1 PE=1 SV=6
	sp|P34955|A1AT_BOVIN	Alpha-1-antiproteinase OS=Bos taurus GN=SERPINA1 PE=1 SV=1
	sp|P48644|AL1A1_BOVIN	Retinal dehydrogenase 1 OS=Bos taurus GN=ALDH1A1 PE=2 SV=3
	tr|A6H7J6|A6H7J6_BOVIN	P4HB protein OS=Bos taurus GN=P4HB PE=2 SV=1
	sp|P50291|FST_BOVIN	Follistatin OS=Bos taurus GN=FST PE=2 SV=2
	sp|P12763|FETUA_BOVIN	Alpha-2-HS-glycoprotein OS=Bos taurus GN=AHSG PE=1 SV=2
	sp|P00761|TRYP_PIG	Trypsin OS=Sus scrofa PE=1 SV=1
	tr|A5PJE3|A5PJE3_BOVIN	Fibrinogen alpha chain OS=Bos taurus GN=FGA PE=2 SV=1
	sp|Q95L54|ANXA8_BOVIN	Annexin A8 OS=Bos taurus GN=ANXA8 PE=2 SV=1
	tr|F1MEN8|F1MEN8_BOVIN	Protein disulfide-isomerase A4 OS=Bos taurus GN=PDIA4 PE=2 SV=1
	sp|Q76LV1|HS90B_BOVIN	Heat shock protein HSP 90-beta OS=Bos taurus GN=HSP90AB1 PE=2 SV=3
	sp|P55859|PNPH_BOVIN	Purine nucleoside phosphorylase OS=Bos taurus GN=PNP PE=1 SV=3
	sp|P19858|LDHA_BOVIN	L-lactate dehydrogenase A chain OS=Bos taurus GN=LDHA PE=2 SV=2
	sp|Q0VCM4|PYGL_BOVIN	Glycogen phosphorylase, liver form OS=Bos taurus GN=PYGL PE=2 SV=1
	sp|P25975|CATL1_BOVIN	Cathepsin L1 OS=Bos taurus GN=CTSL PE=1 SV=3
	sp|Q3B7N2|ACTN1_BOVIN	Alpha-actinin-1 OS=Bos taurus GN=ACTN1 PE=2 SV=1
	sp|P24627|TRFL_BOVIN	Lactotransferrin OS=Bos taurus GN=LTF PE=1 SV=2
	sp|P62935|PPIA_BOVIN	Peptidyl-prolyl cis-trans isomerase A OS=Bos taurus GN=PPIA PE=1 SV=2
	sp|P26779|SAP_BOVIN	Prosaposin OS=Bos taurus GN=PSAP PE=1 SV=3
	tr|F1N5M2|F1N5M2_BOVIN	Vitamin D-binding protein OS=Bos taurus GN=GC PE=4 SV=2
	sp|A3KMV5|UBA1_BOVIN	Ubiquitin-like modifier-activating enzyme 1 OS=Bos taurus GN=UBA1 PE=2 SV=1
	sp|P35527|K1C9_HUMAN	Keratin, type I cytoskeletal 9 OS=Homo sapiens GN=KRT9 PE=1 SV=3
	sp|Q28198|TPA_BOVIN	Tissue-type plasminogen activator OS=Bos taurus GN=PLAT PE=2 SV=1
	sp|Q32PF2|ACLY_BOVIN	ATP-citrate synthase OS=Bos taurus GN=ACLY PE=2 SV=1
	tr|E1B7R4|E1B7R4_BOVIN	Eukaryotic translation initiation factor 3 subunit A OS=Bos taurus GN=EIF3A PE=3 SV=2
	sp|Q7YRQ8|TFPI2_BOVIN	Tissue factor pathway inhibitor 2 OS=Bos taurus GN=TFPI2 PE=2 SV=1
	tr|F1MTV9|F1MTV9_BOVIN	Nucleophosmin OS=Bos taurus GN=NPM1 PE=4 SV=2
	sp|Q3SZV7|HEMO_BOVIN	Hemopexin OS=Bos taurus GN=HPX PE=2 SV=1
	sp|Q3T149|HSPB1_BOVIN	Heat shock protein beta-1 OS=Bos taurus GN=HSPB1 PE=2 SV=1
	sp|Q3ZCH5|ZA2G_BOVIN	Zinc-alpha-2-glycoprotein OS=Bos taurus GN=AZGP1 PE=2 SV=1
	sp|P13645|K1C10_HUMAN	Keratin, type I cytoskeletal 10 OS=Homo sapiens GN=KRT10 PE=1 SV=6
	sp|Q3ZC84|CNDP2_BOVIN	Cytosolic non-specific dipeptidase OS=Bos taurus GN=CNDP2 PE=2 SV=1
	tr|F1MGU7|F1MGU7_BOVIN	Fibrinogen gamma-B chain OS=Bos taurus GN=FGG PE=2 SV=1
	sp|Q32LP2|RADI_BOVIN	Radixin OS=Bos taurus GN=RDX PE=2 SV=1
	sp|P50397|GDIB_BOVIN	Rab GDP dissociation inhibitor beta OS=Bos taurus GN=GDI2 PE=2 SV=3
	sp|P63103|1433Z_BOVIN	14-3-3 protein zeta/delta OS=Bos taurus GN=YWHAZ PE=1 SV=1
	tr|F1MUK3|F1MUK3_BOVIN	Insulin-like growth factor-binding protein 6 OS=Bos taurus GN=IGFBP6 PE=4 SV=1
	sp|Q3ZCI9|TCPQ_BOVIN	T-complex protein 1 subunit theta OS=Bos taurus GN=CCT8 PE=1 SV=3
	tr|A6QP39|A6QP39_BOVIN	MSLN protein OS=Bos taurus GN=MSLN PE=2 SV=1
	sp|P31096|OSTP_BOVIN	Osteopontin OS=Bos taurus GN=SPP1 PE=1 SV=2
	sp|Q3T0K2|TCPG_BOVIN	T-complex protein 1 subunit gamma OS=Bos taurus GN=CCT3 PE=1 SV=1
	tr|F1N430|F1N430_BOVIN	Metalloproteinase inhibitor 2 OS=Bos taurus GN=TIMP2 PE=2 SV=1
	sp|O77834|PRDX6_BOVIN	Peroxiredoxin-6 OS=Bos taurus GN=PRDX6 PE=1 SV=3
	sp|P17248|SYWC_BOVIN	Tryptophan--tRNA ligase, cytoplasmic OS=Bos taurus GN=WARS PE=1 SV=3
	sp|P49951|CLH1_BOVIN	Clathrin heavy chain 1 OS=Bos taurus GN=CLTC PE=1 SV=1
	sp|P62261|1433E_BOVIN	14-3-3 protein epsilon OS=Bos taurus GN=YWHAE PE=2 SV=1
	sp|Q0P569|NUCB1_BOVIN	Nucleobindin-1 OS=Bos taurus GN=NUCB1 PE=2 SV=1
	sp|Q5E9B7|CLIC1_BOVIN	Chloride intracellular channel protein 1 OS=Bos taurus GN=CLIC1 PE=2 SV=3
	sp|F1N152|HTRA1_BOVIN	Serine protease HTRA1 OS=Bos taurus GN=HTRA1 PE=2 SV=1
	tr|F1N455|F1N455_BOVIN	Dipeptidyl peptidase 1 OS=Bos taurus GN=CTSC PE=3 SV=1
	sp|Q5E947|PRDX1_BOVIN	Peroxiredoxin-1 OS=Bos taurus GN=PRDX1 PE=2 SV=1
	sp|Q2NKZ1|TCPH_BOVIN	T-complex protein 1 subunit eta OS=Bos taurus GN=CCT7 PE=1 SV=1
	sp|P02584|PROF1_BOVIN	Profilin-1 OS=Bos taurus GN=PFN1 PE=1 SV=2
	sp|Q5E9F7|COF1_BOVIN	Cofilin-1 OS=Bos taurus GN=CFL1 PE=2 SV=3
	sp|Q28042|OVGP1_BOVIN	Oviduct-specific glycoprotein (Fragment) OS=Bos taurus GN=OVGP1 PE=1 SV=1
	sp|Q3SZK8|NHRF1_BOVIN	Na(+)/H(+) exchange regulatory cofactor NHE-RF1 OS=Bos taurus GN=SLC9A3R1 PE=2 SV=1
	sp|Q3ZBZ8|STIP1_BOVIN	Stress-induced-phosphoprotein 1 OS=Bos taurus GN=STIP1 PE=2 SV=1
	tr|Q3ZCI4|Q3ZCI4_BOVIN	6-phosphogluconate dehydrogenase, decarboxylating OS=Bos taurus GN=PGD PE=2 SV=2
	tr|A6QPW7|A6QPW7_BOVIN	TNFRSF6B protein OS=Bos taurus GN=TNFRSF6B PE=2 SV=1
	tr|A6QNL5|A6QNL5_BOVIN	PDIA6 protein (Fragment) OS=Bos taurus GN=PDIA6 PE=2 SV=1
	tr|F6S1Q0|F6S1Q0_BOVIN	Uncharacterized protein OS=Bos taurus GN=KRT18 PE=2 SV=1
	sp|Q3ZBH0|TCPB_BOVIN	T-complex protein 1 subunit beta OS=Bos taurus GN=CCT2 PE=1 SV=3
	tr|G5E531|G5E531_BOVIN	T-complex protein 1 subunit alpha OS=Bos taurus GN=TCP1 PE=3 SV=1
	sp|O77588|PLOD1_BOVIN	Procollagen-lysine,2-oxoglutarate 5-dioxygenase 1 OS=Bos taurus GN=PLOD1 PE=2 SV=2
	sp|P08728|K1C19_BOVIN	Keratin, type I cytoskeletal 19 OS=Bos taurus GN=KRT19 PE=2 SV=1
	sp|Q58DW0|RL4_BOVIN	60S ribosomal protein L4 OS=Bos taurus GN=RPL4 PE=2 SV=3
	sp|P09867|ROA1_BOVIN	Heterogeneous nuclear ribonucleoprotein A1 OS=Bos taurus GN=HNRNPA1 PE=1 SV=2
	sp|P13214|ANXA4_BOVIN	Annexin A4 OS=Bos taurus GN=ANXA4 PE=1 SV=2
	sp|P19803|GDIR1_BOVIN	Rho GDP-dissociation inhibitor 1 OS=Bos taurus GN=ARHGDIA PE=1 SV=3
	sp|Q3ZBV8|SYTC_BOVIN	Threonine--tRNA ligase, cytoplasmic OS=Bos taurus GN=TARS PE=2 SV=1
	tr|F1N1I6|F1N1I6_BOVIN	Gelsolin OS=Bos taurus GN=GSN PE=2 SV=1
	tr|F1N0E5|F1N0E5_BOVIN	T-complex protein 1 subunit delta OS=Bos taurus GN=CCT4 PE=3 SV=2
	sp|Q2HJ60|ROA2_BOVIN	Heterogeneous nuclear ribonucleoproteins A2/B1 OS=Bos taurus GN=HNRNPA2B1 PE=2 SV=1
	sp|Q5E946|PARK7_BOVIN	Protein DJ-1 OS=Bos taurus GN=PARK7 PE=2 SV=1
	sp|Q9TRY0|FKBP4_BOVIN	Peptidyl-prolyl cis-trans isomerase FKBP4 OS=Bos taurus GN=FKBP4 PE=1 SV=4
	sp|P20959|IBP3_BOVIN	Insulin-like growth factor-binding protein 3 OS=Bos taurus GN=IGFBP3 PE=1 SV=3
	sp|P20414|TIMP1_BOVIN	Metalloproteinase inhibitor 1 OS=Bos taurus GN=TIMP1 PE=1 SV=1
	sp|P10103|HMGB1_BOVIN	High mobility group protein B1 OS=Bos taurus GN=HMGB1 PE=1 SV=3
	sp|Q3T145|MDHC_BOVIN	Malate dehydrogenase, cytoplasmic OS=Bos taurus GN=MDH1 PE=2 SV=3
	tr|F1MAZ3|F1MAZ3_BOVIN	Microtubule-associated protein OS=Bos taurus GN=MAP4 PE=2 SV=2
	sp|Q3MHL7|TCPZ_BOVIN	T-complex protein 1 subunit zeta OS=Bos taurus GN=CCT6A PE=1 SV=3
	sp|Q5E9B1|LDHB_BOVIN	L-lactate dehydrogenase B chain OS=Bos taurus GN=LDHB PE=2 SV=4
	sp|P10462|S10A2_BOVIN	Protein S100-A2 OS=Bos taurus GN=S100A2 PE=1 SV=1
	sp|Q0VCK0|PUR9_BOVIN	Bifunctional purine biosynthesis protein PURH OS=Bos taurus GN=ATIC PE=2 SV=1
	sp|Q3SZV3|EF1G_BOVIN	Elongation factor 1-gamma OS=Bos taurus GN=EEF1G PE=2 SV=1
	sp|Q56JV9|RS3A_BOVIN	40S ribosomal protein S3a OS=Bos taurus GN=RPS3A PE=2 SV=3
	sp|Q9MZ08|BCAM_BOVIN	Basal cell adhesion molecule OS=Bos taurus GN=BCAM PE=2 SV=2
	tr|Q08E54|Q08E54_BOVIN	Amyloid beta (A4) protein OS=Bos taurus GN=APP PE=2 SV=1
	tr|A2VE41|A2VE41_BOVIN	EGF-containing fibulin-like extracellular matrix protein 1 OS=Bos taurus GN=EFEMP1 PE=2 SV=1
	tr|F1MMK2|F1MMK2_BOVIN	Glucose-6-phosphate 1-dehydrogenase OS=Bos taurus GN=G6PD PE=3 SV=1
	sp|Q9BGI3|PRDX2_BOVIN	Peroxiredoxin-2 OS=Bos taurus GN=PRDX2 PE=2 SV=1
	tr|Q3SZA6|Q3SZA6_BOVIN	Syndecan binding protein (Syntenin) OS=Bos taurus GN=SDCBP PE=2 SV=1
	sp|Q3MHL4|SAHH_BOVIN	Adenosylhomocysteinase OS=Bos taurus GN=AHCY PE=2 SV=3
	sp|Q9XSG3|IDHC_BOVIN	Isocitrate dehydrogenase [NADP] cytoplasmic OS=Bos taurus GN=IDH1 PE=2 SV=1
	tr|G5E5C8|G5E5C8_BOVIN	Transaldolase OS=Bos taurus GN=TALDO1 PE=2 SV=1
	sp|P86435|VGF_BOVIN	Neurosecretory protein VGF OS=Bos taurus GN=VGF PE=1 SV=2
	sp|O97680|THIO_BOVIN	Thioredoxin OS=Bos taurus GN=TXN PE=3 SV=3
	sp|Q29S21|K2C7_BOVIN	Keratin, type II cytoskeletal 7 OS=Bos taurus GN=KRT7 PE=2 SV=1
	sp|O18739|CTGF_BOVIN	Connective tissue growth factor OS=Bos taurus GN=CTGF PE=2 SV=2
	tr|A5D7V3|A5D7V3_BOVIN	ESM1 protein OS=Bos taurus GN=ESM1 PE=2 SV=1
	tr|F1MZ58|F1MZ58_BOVIN	Low-density lipoprotein receptor OS=Bos taurus GN=LDLR PE=4 SV=2
	sp|P35908|K22E_HUMAN	Keratin, type II cytoskeletal 2 epidermal OS=Homo sapiens GN=KRT2 PE=1 SV=2
	sp|A6QLN9|VWA1_BOVIN	von Willebrand factor A domain-containing protein 1 OS=Bos taurus PE=2 SV=1
	sp|Q3SZR3|A1AG_BOVIN	Alpha-1-acid glycoprotein OS=Bos taurus GN=ORM1 PE=2 SV=1
	tr|Q3ZC35|Q3ZC35_BOVIN	Cysteine-rich, angiogenic inducer, 61 OS=Bos taurus GN=CYR61 PE=2 SV=1
	sp|P13213|SPRC_BOVIN	SPARC OS=Bos taurus GN=SPARC PE=1 SV=2
	sp|Q3T169|RS3_BOVIN	40S ribosomal protein S3 OS=Bos taurus GN=RPS3 PE=2 SV=1
	tr|A3KLR9|A3KLR9_BOVIN	Superoxide dismutase [Cu-Zn] OS=Bos taurus GN=ECSOD PE=2 SV=1
	tr|A6QR15|A6QR15_BOVIN	LOC535277 protein OS=Bos taurus GN=LOC535277 PE=2 SV=1
	sp|Q28034|GLU2B_BOVIN	Glucosidase 2 subunit beta OS=Bos taurus GN=PRKCSH PE=2 SV=1
	sp|Q3B7M5|LASP1_BOVIN	LIM and SH3 domain protein 1 OS=Bos taurus GN=LASP1 PE=2 SV=1
	sp|Q9XSA7|CLIC4_BOVIN	Chloride intracellular channel protein 4 OS=Bos taurus GN=CLIC4 PE=2 SV=3
	sp|P00727|AMPL_BOVIN	Cytosol aminopeptidase OS=Bos taurus GN=LAP3 PE=1 SV=3
	sp|P13696|PEBP1_BOVIN	Phosphatidylethanolamine-binding protein 1 OS=Bos taurus GN=PEBP1 PE=1 SV=2
	sp|Q58DW5|RL5_BOVIN	60S ribosomal protein L5 OS=Bos taurus GN=RPL5 PE=2 SV=3
	sp|P80311|PPIB_BOVIN	Peptidyl-prolyl cis-trans isomerase B OS=Bos taurus GN=PPIB PE=1 SV=4
	sp|G3X745|GPC1_BOVIN	Glypican-1 OS=Bos taurus GN=GPC1 PE=2 SV=1
	sp|P79103|RS4_BOVIN	40S ribosomal protein S4 OS=Bos taurus GN=RPS4 PE=2 SV=3
	sp|A7MB70|SEM3C_BOVIN	Semaphorin-3C OS=Bos taurus GN=SEMA3C PE=2 SV=1
	sp|Q8MJ24|LOXL4_BOVIN	Lysyl oxidase homolog 4 OS=Bos taurus GN=LOXL4 PE=2 SV=1
	sp|Q3ZBZ1|CAB45_BOVIN	45 kDa calcium-binding protein OS=Bos taurus GN=SDF4 PE=2 SV=1
	tr|Q3ZBH5|Q3ZBH5_BOVIN	Proliferation-associated 2G4, 38kDa OS=Bos taurus GN=PA2G4 PE=2 SV=1
	sp|Q3T0L2|ERP44_BOVIN	Endoplasmic reticulum resident protein 44 OS=Bos taurus GN=ERP44 PE=2 SV=1
	sp|P01888|B2MG_BOVIN	Beta-2-microglobulin OS=Bos taurus GN=B2M PE=1 SV=2
	tr|F1MUZ9|F1MUZ9_BOVIN	60 kDa heat shock protein, mitochondrial OS=Bos taurus GN=HSPD1 PE=3 SV=1
	sp|Q769I5|MET_BOVIN	Hepatocyte growth factor receptor OS=Bos taurus GN=MET PE=2 SV=1
	sp|A5PK39|TPP2_BOVIN	Tripeptidyl-peptidase 2 OS=Bos taurus GN=TPP2 PE=2 SV=1
	sp|Q0IIM3|HS105_BOVIN	Heat shock protein 105 kDa OS=Bos taurus GN=HSPH1 PE=2 SV=1
	sp|A0JNL5|LY66C_BOVIN	Lymphocyte antigen 6 complex locus protein G6c OS=Bos taurus GN=LY6G6C PE=2 SV=1
	sp|Q5E958|RS8_BOVIN	40S ribosomal protein S8 OS=Bos taurus GN=RPS8 PE=2 SV=3
	sp|Q32LE5|ASGL1_BOVIN	Isoaspartyl peptidase/L-asparaginase OS=Bos taurus GN=ASRGL1 PE=2 SV=1
	sp|Q3T0Q4|NDKB_BOVIN	Nucleoside diphosphate kinase B OS=Bos taurus GN=NME2 PE=1 SV=1
	sp|Q3T0X5|PSA1_BOVIN	Proteasome subunit alpha type-1 OS=Bos taurus GN=PSMA1 PE=1 SV=1
	sp|Q5E984|TCTP_BOVIN	Translationally-controlled tumor protein OS=Bos taurus GN=TPT1 PE=2 SV=1
	sp|A6H742|PLSI_BOVIN	Plastin-1 OS=Bos taurus GN=PLS1 PE=2 SV=1
[truncated: 1,226 more rows]

## Sheet: TOTAL SECRETED PROTEINS
		Total Secreted Proteins (OF + OEC-48 + OEC-S4)
[truncated: 268 more rows]
