# Supplementary material for: Profiling of proteins secreted in the bovine oviduct reveals diverse functions of this luminal microenvironment
Source: PLoS One. 2017 Nov 20;12(11):e0188105. doi: 10.1371/journal.pone.0188105 (PMC5695823; doi:10.1371/journal.pone.0188105)
Supplement: S2 Table — (PDF) [file pone.0188105.s004.pdf]

**Table S2. Secreted proteins identified in OF, OEC-48 and OEC-S4 whose corresponding transcripts\* were not detected in the oviduct**

| Name                                          | Accession |
|-----------------------------------------------|-----------|
| Alpha amylase                                 | F1MJQ3    |
| Beta hexosaminidase                           | H7BWW2    |
| Cathepsin B                                   | P07688    |
| Cathepsin D                                   | F1MMR6    |
| Cystatin B                                    | F6QEL0    |
| Folate receptor alpha                         | P02702    |
| Glucosidase 2 subunit beta                    | Q28034    |
| Granzyme A                                    | F6QZF5    |
| Growth regulated protein homolog gamma        | O46675    |
| Hepatoma derived growth factor                | Q9XSK7    |
| Interleukin 8                                 | P79255    |
| Interstitial collagenase                      | F1MT97    |
| Kininogen 2                                   | P01045    |
| Lysozyme C, milk isozyme                      | Q6B411    |
| Macrophage migration inhibitory factor        | P80177    |
| Myeloid derived growth factor                 | P62248    |
| NAD(P)H-hydrate epimerase                     | Q6QRN6    |
| Paraoxonase 1                                 | Q2KIW1    |
| Peptidyl-prolyl cis-trans isomerase C         | Q08E11    |
| Platelet derived growth factor C              | E1BJY4    |
| Primary amine oxidase, liver isozyme          | Q29437    |
| Protein disulfide-isomerase A4                | F1MEN8    |
| Protein HP-20 homolog                         | Q2KIT0    |
| Protein HP-25 homolog 1                       | Q2KIX7    |
| Serpin A3-7                                   | A2I7N3    |
| Serpin A3-8                                   | A6QPQ2    |
| Small inducible cytokine subfamily E member 1 | Q3ZBX5    |
| Tumor necrosis factor ligand 1B               | E1BF06    |
| Family with sequence similarity 3, member B   | E1BQ21    |
| Family with sequence similarity 3, member D   | E1BDN9    |

\* Transcriptome datasets are from Maillo *et al.* [32] and Gonella-Diaza *et al.* [33]
